# Supplementary material for: Covalent disruptor of YAP-TEAD association suppresses defective Hippo signaling
Source: eLife. 2022 Oct 27;11:e78810. doi: 10.7554/eLife.78810 (PMC9728995; doi:10.7554/eLife.78810)
Supplement: Supplementary file 2. [file elife-78810-supp2.xlsx]

## Sheet: siteQuant_5201_export
Protein Id	gene_symbol	prot_description	Site Position	sequence	DMSO_1	DMSO_2	DMSO_3	0.5uM_1	0.5uM_2	0.5uM_3	2uM_1	2uM_2	2uM_3	10uM_1	10uM_2	10uM_3	25uM_1	25uM_2	25uM_3	DMSO Avg	0.5uM Avg	2uM Avg	10uM Avg	25uM Avg	0.5uM CR	2uM CR	10uM CR	25uM CR	Gene + Site	CV DMSO	CV 0.5	CV 2	CV 10	CV 25
sp|O95197-5|RTN3_HUMAN	RTN3	RTN3_HUMAN Isoform 5 of Reticulon-3	42;46	K.SC#SSSC#AVHDLIFWR.D	94.2805	83.7981	90.0089	67.9921	83.4183	71.6301	94.0204	67.1766	63.7433	43.9258	53.148	51.9016	20.0294	25.1701	17.2843	89.3625	74.3468	74.9801	49.6584	20.8279	1.20197	1.19182	1.79954	4.29051	RTN3_C42;46	5.89844	10.8464	22.1105	10.076	19.2199
sp|Q9P2T1-2|GMPR2_HUMAN	GMPR2	GMPR2_HUMAN Isoform 2 of GMP reductase 2	204	K.VGIGPGSVC#TTR.K	127.692	130.138	127.146	108.71	127.002	126.058	133.941	111.138	98.38	54.3992	62.1772	71.2402	47.0165	47.0718	39.7644	128.325	120.59	114.486	62.6055	44.6175	1.06415	1.12088	2.04974	2.87612	GMPR2_C204	1.24146	8.54067	15.7357	13.4631	9.42017
sp|O76062|ERG24_HUMAN	TM7SF2	ERG24_HUMAN Delta(14)-sterol reductase	184	R.IC#FFDFK.Y	222.005	179.233	210.559	198.407	186.894	180.9	160.952	181.562	176.85	125.426	158.137	149.365	73.9678	82.2754	84.2641	203.932	188.734	173.121	144.309	80.1691	1.08053	1.17797	1.41316	2.54377	TM7SF2_C184	10.8579	4.71417	6.23776	11.7328	6.81276
sp|Q8N3C0|ASCC3_HUMAN	ASCC3	ASCC3_HUMAN Activating signal cointegrator 1 complex subunit 3	1315	R.HPPHTELLDLQPLPITALGC#K.A	136.092	121.498	95.0386	130.869	137.606	124.79	59.0758	102.713	91.51	55.185	115.896	52.6172	53.3089	52.3911	51.3234	117.543	131.088	84.4329	74.5661	52.3411	0.896669	1.39215	1.57636	2.24571	ASCC3_C1315	17.7045	4.89049	26.8415	48.0323	1.89851
sp|Q9UPU7|TBD2B_HUMAN	TBC1D2B	TBD2B_HUMAN TBC1 domain family member 2B	726	K.HYSC#PTSEGIQK.L	19.46	15.9678	9.86285	14.4123	23.5816	15.1294	21.9591	13.583	12.17	13.0683	11.5295	7.03287	6.15346	6.32168	8.18357	15.0969	17.7078	15.904	10.5435	6.88624	0.852557	0.949248	1.43186	2.19233	TBC1D2B_C726	32.1754	28.798	33.2696	29.745	16.3612
sp|Q5MNZ6|WIPI3_HUMAN	WDR45B	WIPI3_HUMAN WD repeat domain phosphoinositide-interacting protein 3	63	R.C#NYLALVGGGK.K	272.661	276.624	262.82	274.894	267.671	259.489	224.413	234.786	226.51	152.741	146.236	141.212	119.658	118.508	134.519	270.702	267.352	228.569	146.73	124.228	1.01253	1.18433	1.84491	2.17907	WDR45B_C63	2.62558	2.88284	2.39951	3.93946	7.18884
sp|O60888-2|CUTA_HUMAN	CUTA	CUTA_HUMAN Isoform A of Protein CutA	115	R.LAAC#VNLIPQITSIYEWK.G	178.08	144.878	134.528	163.234	171.651	176.899	120.654	120.462	132.71	83.2627	120.234	80.0097	76.2422	70.5409	71.6002	152.495	170.595	124.608	94.5021	72.7944	0.893903	1.2238	1.61367	2.09488	CUTA_C115	14.9207	4.04095	5.63108	23.6436	4.16583
sp|P42695|CNDD3_HUMAN	NCAPD3	CNDD3_HUMAN Condensin-2 complex subunit D3	631	R.GVVPVVMDC#ESTVQEK.A	11.445	9.85476	9.78727	7.34274	7.3571	7.46006	8.8055	11.2958	11.86	7.44119	10.0067	9.74256	4.52349	5.97419	5.34239	10.3623	7.38663	10.6538	9.06348	5.28002	1.40285	0.972644	1.14331	1.96256	NCAPD3_C631	9.05404	0.866289	15.2558	15.5696	13.7757
sp|Q9C0I1|MTMRC_HUMAN	MTMR12	MTMRC_HUMAN Myotubularin-related protein 12	152	R.VFQFC#LR.Y	29.47	22.2	28.9587	29.808	28.6301	35.9092	22.8214	24.3421	28.39	19.2269	25.7333	18.1426	11.2708	17.2543	12.591	26.8762	31.4491	25.1845	21.0343	13.7054	0.854594	1.06717	1.27773	1.961	MTMR12_C152	15.0981	12.4238	11.4288	19.518	22.9366
sp|P30519|HMOX2_HUMAN	HMOX2	HMOX2_HUMAN Heme oxygenase 2	282	K.GALEGSSC#PFR.T	61.9266	66.8384	64.7572	58.436	57.6378	63.4597	67.6141	48.1941	63.38	50.8866	35.1002	46.1509	39.0561	34.4284	31.3137	64.5074	59.8445	59.7294	44.0459	34.9328	1.07792	1.07999	1.46455	1.84662	HMOX2_C282	3.82187	5.27399	17.0967	18.3921	11.1522
sp|Q5VT25-6|MRCKA_HUMAN	CDC42BPA	MRCKA_HUMAN Isoform 6 of Serine/threonine-protein kinase MRCK alpha	912	K.ASNIITEC#K.L	538.731	160.453	105.355	171.833	156.031	154.236	140.317	143.369	170.3	157.859	190.281	146.409	161.304	142.792	149.296	268.18	160.7	151.329	164.85	151.131	1.66882	1.77217	1.62681	1.77449	CDC42BPA_C912	87.9704	6.02571	10.9037	13.804	6.21397
sp|P02462|CO4A1_HUMAN	COL4A1	CO4A1_HUMAN Collagen alpha-1(IV) chain	1505;1511	K.FSTMPFLFC#NINNVC#NFASR.N	17.636	17.1078	13.5974	15.7162	7.06155	8.89027	11.9509	10.0875	14.132	13.376	23.9848	6.97283	11.8236	5.90847	9.98411	16.1137	10.556	12.0568	14.7779	9.23872	1.5265	1.33649	1.0904	1.74415	COL4A1_C1505;1511	13.6231	43.2116	16.79	58.1424	32.7663
sp|O14545|TRAD1_HUMAN	TRAFD1	TRAD1_HUMAN TRAF-type zinc finger domain-containing protein 1	267	R.AVC#EADQSHGGPR.S	14.7933	9.33044	9.87545	11.4512	6.88245	12.1134	8.42899	8.20349	10.26	10.3298	7.97209	7.59944	6.53252	5.72025	7.3215	11.3331	10.149	8.96416	8.63379	6.52476	1.11667	1.26426	1.31264	1.73693	TRAFD1_C267	26.5509	28.0641	12.5821	17.1488	12.271
sp|Q96EP0|RNF31_HUMAN	RNF31	RNF31_HUMAN E3 ubiquitin-protein ligase RNF31	717;719	R.MQALTSC#EC#TICPDCFR.Q	11.2187	12.4242	18.34	12.7679	11.2595	9.36586	10.913	11.2019	11.1741	9.80747	11.0551	10.2317	10.3908	3.71404	10.7998	13.9943	11.1311	11.0963	10.3648	8.30154	1.25723	1.26117	1.35018	1.68575	RNF31_C717;719	27.2357	15.3144	1.43618	6.12048	47.9207
sp|Q00765|REEP5_HUMAN	REEP5	REEP5_HUMAN Receptor expression-enhancing protein 5	18	K.NC#MTDLLAK.L	503.008	510.243	526.825	539.91	514.652	477.161	455.263	502.257	479.44	383.302	397.082	404.15	307.092	310.083	296.527	513.359	510.574	478.986	394.845	304.567	1.00545	1.07176	1.30015	1.68553	REEP5_C18	2.37852	6.18382	4.90629	2.68524	2.33836
sp|Q9BVS4|RIOK2_HUMAN	RIOK2	RIOK2_HUMAN Serine/threonine-protein kinase RIO2	365	R.NCLEESEGC#YCR.S	11.9117	9.10403	12.1176	10.6208	7.00111	10.5007	6.33996	7.46833	9.48	5.2227	6.88441	7.99358	7.75816	7.45771	4.68673	11.0444	9.37419	7.76276	6.70023	6.6342	1.17817	1.42274	1.64837	1.66477	RIOK2_C365	15.2437	21.9328	20.49	20.8141	25.5228
sp|P07476|INVO_HUMAN_contaminant	IVL	INVO_HUMAN_contaminant Involucrin	44	K.QPTPLPPPC#QK.V	63.2333	70.163	45.0315	70.1167	66.7857	63.8906	36.728	69.0004	44.2	39.9213	40.6794	37.8002	36.668	31.7554	38.8173	59.4759	66.931	49.9761	39.467	35.7469	0.888616	1.19009	1.50698	1.66381	IVL_C44	21.8243	4.65491	33.8036	3.78148	10.1266
sp|Q53R41|FAKD1_HUMAN	FASTKD1	FAKD1_HUMAN FAST kinase domain-containing protein 1	70	K.QVGC#AFDMLWK.L	23.8583	20.782	23.0763	19.5369	22.3086	20.7675	19.5421	21.9382	13.69	18.1177	15.2532	24.7321	11.3213	11.7479	18.0549	22.5722	20.871	18.3901	19.3676	13.708	1.08151	1.22741	1.16546	1.64664	FASTKD1_C70	7.08359	6.65391	23.0725	25.1011	27.5057
sp|P16144|ITB4_HUMAN	ITGB4	ITB4_HUMAN Integrin beta-4	742;748;749	K.AC#LALLPC#C#NR.G	129.465	118.28	129.772	141.054	122.516	126.216	95.5429	104.26	111.94	113.599	124.709	100.391	82.9212	70.7031	78.0744	125.839	129.929	103.914	112.9	77.2329	0.968523	1.21099	1.11461	1.62934	ITGB4_C742;748;749	5.2038	7.55088	7.89511	10.7833	7.96601
sp|Q96CP6|GRM1A_HUMAN	GRAMD1A	GRM1A_HUMAN GRAM domain-containing protein 1A	480	R.YC#ILGLAR.N	11.34	14.2399	11.1729	10.5989	10.5826	12.7166	8.41684	11.4475	10.68	10.7458	8.72707	6.98361	6.88631	10.4649	5.26954	12.2509	11.2993	10.1815	8.81883	7.54023	1.08422	1.20326	1.38918	1.62474	GRAMD1A_C480	14.077	10.8623	15.4758	21.3496	35.2598
sp|O15533-3|TPSN_HUMAN	TAPBP	TPSN_HUMAN Isoform 3 of Tapasin	440	K.ALGWAAVYLSTC#K.D	336.77	248.693	312.349	326.785	268.567	256.843	309.528	257.611	222.56	243.722	949.344	279.492	178.64	187.499	187.299	299.27	284.065	263.233	490.853	184.479	1.05353	1.1369	0.609695	1.62224	TAPBP_C440	15.1942	13.1865	16.6225	80.975	2.74183
sp|Q8WVD3-2|RN138_HUMAN	RNF138	RN138_HUMAN Isoform 2 of E3 ubiquitin-protein ligase RNF138	34	R.TTAC#QHVNR.S	7.86333	9.33044	8.17496	7.86723	5.41535	5.21958	9.03626	5.95133	7.6	10.9191	7.28109	13.5608	0	8.52692	7.20009	8.45624	6.16738	7.5292	10.587	5.24233	1.37112	1.12313	0.798739	1.61307	RNF138_C34	9.14055	23.9219	20.5027	29.7816	87.5223
sp|Q9Y4C1|KDM3A_HUMAN	KDM3A	KDM3A_HUMAN Lysine-specific demethylase 3A	1273	K.HC#FWLTQEFR.Y	242.212	140.612	108.844	125.209	116.57	119.546	111.277	110.8	120.52	120.827	147.413	111.257	100.603	99.4762	104.808	163.889	120.442	114.199	126.499	101.629	1.36074	1.43512	1.29558	1.61262	KDM3A_C1273	42.5068	3.64377	4.7981	14.8092	2.76497
sp|Q03001-3|DYST_HUMAN	DST	DYST_HUMAN Isoform 3 of Dystonin	2050	K.NPVPSAEEWMLEGC#R.A	9.28666	13.2271	9.09448	9.2877	7.65915	6.54909	7.10513	10.9341	7.76	9.75212	5.8863	8.91734	7.93505	5.66679	6.27731	10.5361	7.83198	8.59974	8.18525	6.62638	1.34526	1.22516	1.2872	1.59002	DST_C2050	22.1378	17.5876	23.8142	24.8524	17.713
sp|Q07065|CKAP4_HUMAN	CKAP4	CKAP4_HUMAN Cytoskeleton-associated protein 4	100	K.SSSSSSASAAAAAAAASSSASC#SR.R	89.6116	78.4925	92.3808	80.0162	92.4816	92.2166	92.4517	83.8087	88.44	72.3898	73.9754	68.2102	50.6428	54.4493	58.9241	86.8283	88.2382	88.2334	71.5251	54.6721	0.984022	0.984075	1.21395	1.58816	CKAP4_C100	8.46567	8.0709	4.902	4.16391	7.58184
sp|P29279|CTGF_HUMAN	CTGF	CTGF_HUMAN Connective tissue growth factor	160;161;166	K.C#C#EEWVC#DEPK.D	10.2417	14.9077	13.3087	8.43376	8.18667	8.75298	7.10028	6.63974	11.5924	10.7648	7.58838	14.528	9.31228	6.05428	8.85434	12.8194	8.4578	8.44414	10.9604	8.07364	1.51569	1.51814	1.16961	1.58781	CTGF_C160;161;166	18.4972	3.3569	32.4034	31.6953	21.8456
sp|Q16678|CP1B1_HUMAN	CYP1B1	CP1B1_HUMAN Cytochrome P450 1B1	470	R.C#IGEELSK.M	34.0083	51.514	38.3429	37.6643	35.6205	37.7435	35.6714	43.5964	32.92	22.7049	33.6926	28.1192	24.0579	28.1335	26.2748	41.2884	37.0094	37.3959	28.1722	26.1554	1.11562	1.10409	1.46557	1.57858	CYP1B1_C470	22.0812	3.25195	14.8229	19.5018	7.80118
sp|P35869|AHR_HUMAN	AHR	AHR_HUMAN Aryl hydrocarbon receptor	101	R.NGGQDNC#R.A	107.998	108.545	88.4759	96.0239	87.5948	100.157	60.764	79.9345	102.76	82.2113	59.1189	77.3739	64.744	67.6941	61.3282	101.673	94.5918	81.1528	72.9014	64.5888	1.07486	1.25286	1.39467	1.57416	AHR_C101	11.2443	6.7683	25.9073	16.7055	4.9324
sp|Q9UKT4|FBX5_HUMAN	FBXO5	FBX5_HUMAN F-box only protein 5	15;17	R.C#SC#SASPSAVTAAGR.P	13.8049	18.8177	15.3715	13.8102	12.7108	18.8782	11.1847	9.96	11.1461	8.22152	9.36943	11.9839	9.38389	8.78543	12.3547	15.9981	15.133	10.7636	9.85827	10.1747	1.05716	1.48631	1.62281	1.57234	FBXO5_C15;17	16.0298	21.7381	6.46822	19.5594	18.7871
sp|Q8NBS9|TXND5_HUMAN	TXNDC5	TXND5_HUMAN Thioredoxin domain-containing protein 5	350	K.FYAPWC#GHC#K.T	256.375	237.646	257.265	247.96	254.888	226.03	232.307	298.757	218.27	178.196	215.899	227.269	164.324	178.29	136.571	250.429	242.959	249.778	207.121	159.728	1.03074	1.00261	1.20909	1.56784	TXNDC5_C350	4.42402	6.20059	17.2127	12.402	13.295
sp|Q86SQ7|SDCG8_HUMAN	SDCCAG8	SDCG8_HUMAN Serologically defined colon cancer antigen 8	713	R.TQLPSMPQSDC#.-	9.16999	11.0821	9.85025	9.68106	7.616	8.87574	6.02418	10.5957	8.88	7.52207	8.91902	10.5432	5.04154	7.52454	6.66585	10.0341	8.72427	8.49996	8.99475	6.41064	1.15014	1.18049	1.11555	1.56523	SDCCAG8_C713	9.65944	11.9303	27.1688	16.8094	19.6707
sp|Q5IJ48|CRUM2_HUMAN	CRB2	CRUM2_HUMAN Protein crumbs homolog 2	208;220	R.C#DCAGTGYEGTHC#ER.E	125.928	160.001	124.395	105.587	119.661	109.539	101.345	121.622	118.732	104.357	96.3208	118.914	90.4069	80.5936	91.1778	136.774	111.596	113.899	106.531	87.3928	1.22562	1.20083	1.2839	1.56505	CRB2_C208;220	14.717	6.50457	9.62973	10.7505	6.75211
sp|Q6ZW49|PAXI1_HUMAN	PAXIP1	PAXI1_HUMAN PAX-interacting protein 1	648;653	R.C#THLLC#ESQVSSAYAQAIR.E	21.4714	26.1014	22.2811	25.4106	20.8561	24.0418	19.3975	19.0654	18.5049	16.6786	21.9763	14.6054	17.8143	9.7962	17.1117	23.2847	23.4362	18.9893	17.7535	14.9074	0.993535	1.2262	1.31156	1.56196	PAXIP1_C648;653	10.6197	9.9712	2.37579	21.4109	29.7861
sp|P17936-2|IBP3_HUMAN	IGFBP3	IBP3_HUMAN Isoform 2 of Insulin-like growth factor-binding protein 3	268;270	R.GFC#WC#VDK.Y	235.792	200.629	201.548	218.729	179.763	186.943	180.981	180.377	213.109	162.265	187.691	176.591	138.842	118.682	152.547	212.656	195.145	191.489	175.516	136.69	1.08974	1.11054	1.21161	1.55576	IGFBP3_C268;270	9.42424	10.6268	9.77906	7.26278	12.4623
sp|Q5VV42|CDKAL_HUMAN	CDKAL1	CDKAL_HUMAN Threonylcarbamoyladenosine tRNA methylthiotransferase	556	R.LHQDC#ALR.M	123.982	118.15	109.373	96.4282	122.19	108.208	119.475	110.053	105.41	101.577	93.8864	100.443	70.7963	82.9704	72.5351	117.168	108.942	111.646	98.6355	75.4339	1.07551	1.04946	1.18789	1.55326	CDKAL1_C556	6.27607	11.8383	6.41921	4.20912	8.72869
sp|Q8TBF2-6|PGFS_HUMAN	FAM213B	PGFS_HUMAN Isoform 6 of Prostamide/prostaglandin F synthase	74;77	R.FGC#VVC#R.W	41.7241	45.1171	49.0965	38.8189	38.6161	45.5106	36.4461	42.3366	47.3034	38.5271	32.3204	27.1279	22.4008	33.4123	31.7356	45.3126	40.9819	42.0287	32.6585	29.1829	1.10567	1.07813	1.38747	1.55271	FAM213B_C74;77	8.14365	9.57335	12.9321	17.4752	20.3304
sp|Q15021|CND1_HUMAN	NCAPD2	CND1_HUMAN Condensin complex subunit 1	439	K.NAIQLLASFLANNPFSC#K.L	60.3516	42.8986	57.3255	63.9431	50.3239	51.7895	54.3026	33.7942	40.12	38.269	143.421	60.9187	30.7673	34.6155	38.2831	53.5252	55.3522	42.7389	80.8695	34.5553	0.966994	1.25238	0.661871	1.54897	NCAPD2_C439	17.4245	13.5062	24.5725	68.4339	10.8761
sp|P07339|CATD_HUMAN_contaminant	CTSD	CATD_HUMAN_contaminant Cathepsin D	117	K.LLDIAC#WIHHK.Y	637.175	469.036	429.116	488.096	417.985	423.377	447.089	259.816	386.28	367.022	495.332	380.206	350.684	282.792	365.128	511.776	443.152	364.395	414.187	332.868	1.15485	1.40445	1.23562	1.53747	CTSD_C117	21.5754	8.80405	26.2175	17.0412	13.2078
sp|Q9H093|NUAK2_HUMAN	NUAK2	NUAK2_HUMAN NUAK family SNF1-like kinase 2	571;591	R.GC#VSVDNLTGLEEPPSEGPGSC#LR.R	80.3529	71.3129	47.8932	67.0964	68.8076	71.7171	74.2104	69.4808	70.5091	60.6318	54.1572	59.3601	50.5662	36.122	43.1902	66.5197	69.207	71.4001	58.0497	43.2928	0.961169	0.931647	1.14591	1.53651	NUAK2_C571;591	25.1839	3.37552	3.48387	5.9095	16.6833
sp|Q9HCC9|LST2_HUMAN	ZFYVE28	LST2_HUMAN Lateral signaling target protein 2 homolog	49	R.C#TLLVSQFR.S	46.235	50.7633	53.2821	40.4179	40.3993	47.0131	35.1613	40.259	38.57	38.8814	31.9268	32.2207	33.9514	29.2695	34.8348	50.0935	42.6101	37.9967	34.3429	32.6852	1.17562	1.31836	1.45863	1.5326	ZFYVE28_C49	7.12865	8.9489	6.83413	11.4526	9.15064
sp|Q12805|FBLN3_HUMAN	EFEMP1	FBLN3_HUMAN EGF-containing fibulin-like extracellular matrix protein 1	212;218;224	K.RGEQC#VDIDEC#TIPPYC#HQR.C	11.9922	12.2452	6.25551	8.19452	11.4613	6.64323	7.55749	11.989	11.4167	10.4089	11.9953	12.3349	7.61631	7.63208	4.7213	10.1643	8.76636	10.3211	11.5797	6.65656	1.15947	0.984812	0.877767	1.52696	EFEMP1_C212;218;224	33.3272	28.0552	23.3539	8.87802	25.1783
sp|Q96JM2-3|ZN462_HUMAN	ZNF462	ZN462_HUMAN Isoform 3 of Zinc finger protein 462	1016	K.TFTPEC#ENQK.D	16.24	11.2609	10.0014	8.78507	8.11223	9.45433	7.29945	10.8057	9.01	9.64812	11.2351	13.5115	7.0253	9.42238	8.24428	12.5008	8.78388	9.0384	11.4649	8.23065	1.42315	1.38307	1.09035	1.51881	ZNF462_C1016	26.3898	7.63957	19.3985	16.9378	14.5626
sp|Q9ULP9|TBC24_HUMAN	TBC1D24	TBC24_HUMAN TBC1 domain family member 24	161	R.ILAC#NDPGR.R	12.88	12.524	12.042	7.76889	10.9494	10.3776	9.71641	8.2385	10.82	11.3235	7.05076	9.76719	4.94045	11.3336	8.58425	12.482	9.69861	9.59164	9.3805	8.2861	1.28699	1.30134	1.33063	1.50638	TBC1D24_C161	3.36943	17.4816	13.5041	23.0529	38.7031
sp|P48506|GSH1_HUMAN	GCLC	GSH1_HUMAN Glutamate--cysteine ligase catalytic subunit	553	R.C#SILNYLK.L	306.238	255.747	265.025	296.168	295.363	301.861	279.59	272.151	266.06	217.782	209.501	233.206	184.553	188.996	177.865	275.67	297.798	272.6	220.163	183.805	0.925696	1.01126	1.25212	1.4998	GCLC_C553	9.74939	1.18955	2.48572	5.46431	3.04823
sp|Q2KHR3|QSER1_HUMAN	QSER1	QSER1_HUMAN Glutamine and serine-rich protein 1	1188	R.TFC#PPPLPK.P	55.2066	19.1137	22.3205	28.8465	28.2418	23.8082	19.3478	23.3969	24.65	28.5168	20.9859	29.1784	18.1066	21.1302	25.2792	32.2136	26.9655	22.4649	26.2271	21.5053	1.19462	1.43395	1.22826	1.49794	QSER1_C1188	62.0141	10.2019	12.3359	17.3523	16.7447
sp|Q8TBF2-6|PGFS_HUMAN	FAM213B	PGFS_HUMAN Isoform 6 of Prostamide/prostaglandin F synthase	74	R.FGC#VVC#R.W	44.5666	36.8213	40.0182	35.0092	37.3573	42.2983	42.8129	36.8515	32.7	30.1576	35.2026	32.0729	32.7763	24.8323	23.6158	40.4687	38.2216	37.4548	32.4777	27.0748	1.05879	1.08047	1.24605	1.4947	FAM213B_C74	9.61799	9.73438	13.5721	7.84153	18.3749
sp|Q9HA92|RSAD1_HUMAN	RSAD1	RSAD1_HUMAN Radical S-adenosyl methionine domain-containing protein 1, mitochondrial	53;56	R.C#SYC#NFNK.Y	60.6695	51.8591	58.5752	52.6483	63.1661	65.3774	45.4839	43.4677	47.7841	48.2681	45.8516	46.3899	37.7549	34.7199	42.1481	57.0346	60.3973	45.5786	46.8366	38.2076	0.944324	1.25135	1.21774	1.49275	RSAD1_C53;56	8.07015	11.2609	4.73851	2.70861	9.77484
sp|Q86XP1-3|DGKH_HUMAN	DGKH	DGKH_HUMAN Isoform 3 of Diacylglycerol kinase eta	193	R.ATFSFC#VSPLLVFVNSK.S	7.01166	4.59968	7.79707	4.06473	3.81879	5.40423	4.53028	6.32474	5.48	5.82354	24.4793	3.51028	4.68775	4.38374	3.93394	6.46947	4.42925	5.44501	11.271	4.33514	1.46062	1.18815	0.57399	1.49233	DGKH_C193	25.7552	19.2643	16.4875	102.005	8.74815
sp|Q53EP0|FND3B_HUMAN	FNDC3B	FND3B_HUMAN Fibronectin type III domain-containing protein 3B	442	K.LC#PAMGYTFR.L	109.317	94.1505	89.4081	107.246	82.1795	93.8662	85.966	43.1996	64.06	70.2291	134.003	78.6549	74.7639	59.9156	61.8382	97.625	94.4304	64.4085	94.2956	65.5059	1.03383	1.51572	1.03531	1.49032	FNDC3B_C442	10.6521	13.2823	33.2026	36.7404	12.3272
sp|O15118|NPC1_HUMAN	NPC1	NPC1_HUMAN Niemann-Pick C1 protein	816	R.GAEDGTSVQASESC#LFR.F	47.1566	56.5904	55.8139	54.7537	57.174	48.872	55.0435	44.6233	40.55	51.291	52.0809	52.9375	34.1283	40.9372	32.3943	53.187	53.5999	46.7389	52.1031	35.8199	0.992296	1.13796	1.0208	1.48484	NPC1_C816	9.84609	7.96562	15.9926	1.58039	12.6067
sp|Q8N961|ABTB2_HUMAN	ABTB2	ABTB2_HUMAN Ankyrin repeat and BTB/POZ domain-containing protein 2	27	K.TLEDLTLDSGYGAGDSC#R.S	6.615	9.72368	11.0091	11.2764	9.06153	9.82364	11.1617	8.11014	9.14	8.30779	11.0048	6.95897	8.17513	5.37276	4.881	9.11593	10.0538	9.47062	8.75719	6.14296	0.906711	0.962548	1.04096	1.48396	ABTB2_C27	24.7832	11.1919	16.392	23.5238	28.9274
sp|P46939-2|UTRO_HUMAN	UTRN	UTRO_HUMAN Isoform 2 of Utrophin	1223	K.VPSGGQELTSELNVVLENYQLLC#NR.I	118.265	53.2896	54.3905	68.3138	58.3822	69.6518	45.8858	55.429	65.98	58.4434	87.6418	62.914	53.2963	46.4704	52.7925	75.315	65.4492	55.7649	69.6664	50.8531	1.15074	1.35058	1.08108	1.48103	UTRN_C1223	49.3923	9.40687	18.0245	22.5745	7.48012
sp|O95476|CNEP1_HUMAN	CTDNEP1	CNEP1_HUMAN CTD nuclear envelope phosphatase 1	6	R.TQC#LLGLR.T	22.19	21.2586	25.0287	21.318	19.4068	22.811	15.692	17.8773	22.14	20.5904	20.794	18.0564	17.4369	16.4791	12.4818	22.8258	21.1786	18.5698	19.8136	15.4659	1.07778	1.22919	1.15203	1.47587	CTDNEP1_C6	8.60349	8.05718	17.6593	7.69765	16.9945
sp|Q9BRJ7|SDOS_HUMAN	NUDT16L1	SDOS_HUMAN Protein syndesmos	88	R.VLGLGLGC#LR.L	696.861	600.401	567.7	609.513	638.709	635.656	630.583	581.83	567.5	514.748	559.531	571.683	406.469	442.143	415.65	621.654	627.959	593.304	548.654	421.421	0.989959	1.04778	1.13305	1.47514	NUDT16L1_C88	10.8022	2.55549	5.57385	5.4653	4.39559
sp|O95881|TXD12_HUMAN	TXNDC12	TXD12_HUMAN Thioredoxin domain-containing protein 12	66;69	K.SWC#GAC#K.A	188.692	168.423	157.574	159.01	151.437	160.682	165.241	140.576	121.983	132.211	126.977	132.311	117.988	116.669	115.219	171.563	157.043	142.6	130.5	116.625	1.09246	1.2031	1.31466	1.47106	TXNDC12_C66;69	9.20663	3.1369	15.217	2.33819	1.18786
sp|O94964-2|SOGA1_HUMAN	SOGA1	SOGA1_HUMAN Isoform 2 of Protein SOGA1	684;689	R.LC#LDNEC#ADFR.L	36.9606	43.6736	34.1607	26.2943	27.2212	33.7999	38.9142	33.8814	29.9313	32.3949	31.4014	28.1831	31.0091	23.7192	23.3586	38.2649	29.1051	34.2423	30.6598	26.029	1.31471	1.11747	1.24805	1.47009	SOGA1_C684;689	12.7761	14.0599	13.1484	7.18103	16.5841
sp|P16144|ITB4_HUMAN	ITGB4	ITB4_HUMAN Integrin beta-4	748;749	K.ACLALLPC#C#NR.G	89.3922	106.593	100.532	99.0404	95.0889	99.2505	93.22	85.9598	97.332	86.8532	97.261	81.143	68.0898	73.5042	60.5377	98.8392	97.7933	92.1706	88.4191	67.3772	1.0107	1.07235	1.11785	1.46695	ITGB4_C748;749	8.82708	2.39732	6.24739	9.24269	9.66578
sp|O43865|SAHH2_HUMAN	AHCYL1	SAHH2_HUMAN Putative adenosylhomocysteinase 2	392;395	K.NSC#IVC#NMGHSNTEIDVTSLR.T	14.0728	13.6427	16.0894	12.9375	14.3878	11.6612	14.5354	16.6418	17.6597	12.8285	8.88968	8.01257	7.67822	10.6857	11.579	14.6016	12.9955	16.279	9.91026	9.981	1.12359	0.896963	1.47339	1.46294	AHCYL1_C392;395	8.94626	10.4973	9.78849	25.8829	20.4756
sp|Q9ULZ3|ASC_HUMAN	PYCARD	ASC_HUMAN Apoptosis-associated speck-like protein containing a CARD	173	K.LFSFTPAWNWTC#K.D	406.338	346.597	340.879	353.533	267.078	296.728	311.763	78.4058	203.27	234.074	424.76	254.206	263.664	245.49	239.193	364.605	305.78	197.813	304.347	249.449	1.19238	1.84318	1.19799	1.46164	PYCARD_C173	9.94366	14.3675	59.0327	34.4232	5.09382
sp|O15118|NPC1_HUMAN	NPC1	NPC1_HUMAN Niemann-Pick C1 protein	323;324	K.GEASC#C#DPVSAAFEGCLR.R	11.6921	16.7375	14.8937	17.9501	13.6066	16.1756	13.6271	14.7229	15.9407	12.0042	16.2222	15.5586	9.77182	9.41477	10.4846	14.4411	15.9108	14.7636	14.595	9.8904	0.90763	0.978158	0.989456	1.46011	NPC1_C323;324	17.6783	13.7254	7.83917	15.5402	5.50726
sp|O95881|TXD12_HUMAN	TXNDC12	TXD12_HUMAN Thioredoxin domain-containing protein 12	66	K.SWC#GAC#K.A	449.19	613.271	694.972	555	542.624	566.706	566.394	1250.93	496.22	536.574	564.752	549.217	400.316	417.605	389.606	585.811	554.777	771.183	550.181	402.509	1.05594	0.759627	1.06476	1.4554	TXNDC12_C66	21.3671	2.17068	54.067	2.56523	3.50993
sp|Q7Z5L2|R3HCL_HUMAN	R3HCC1L	R3HCL_HUMAN Coiled-coil domain-containing protein R3HCC1L	186	K.PFQNVEFC#DFSR.H	10.9667	8.09115	4.98811	9.08009	9.07232	9.99598	4.94322	7.55001	12.12	4.76051	8.35598	5.81351	7.44227	6.56225	2.52549	8.01531	9.3828	8.20441	6.31	5.51001	0.854255	0.976951	1.27025	1.45468	R3HCC1L_C186	37.3036	5.65981	44.2794	29.2938	47.5834
sp|Q5UIP0|RIF1_HUMAN	RIF1	RIF1_HUMAN Telomere-associated protein RIF1	880	K.VYSC#LNNK.L	404.728	377.293	346.296	359.139	385.428	378.961	389.009	341.443	320.46	332.716	309.632	359.083	259.216	269.026	251.129	376.106	374.509	350.304	333.81	259.79	1.00426	1.07366	1.1267	1.44773	RIF1_C880	7.7729	3.65766	10.0264	7.41249	3.44978
sp|Q53EQ6|TIGD5_HUMAN	TIGD5	TIGD5_HUMAN Tigger transposable element-derived protein 5	476	R.C#WLLGLR.A	15.7383	16.2419	15.506	20.1598	19.5578	18.0223	11.271	16.9088	14.38	16.2112	15.3811	13.6716	12.6607	9.87679	10.272	15.8287	19.2466	14.1866	15.088	10.9365	0.822415	1.11575	1.0491	1.44733	TIGD5_C476	2.37666	5.72661	19.9049	8.5824	13.7726
sp|Q9NXH8|TOR4A_HUMAN	TOR4A	TOR4A_HUMAN Torsin-4A	21	R.C#VIAPVR.A	97.9416	98.7382	94.308	90.0251	88.4902	100.625	94.3585	83.2952	95.62	82.9508	80.655	105.961	64.2259	73.2807	64.8251	96.9959	93.0466	91.0912	89.8556	67.4439	1.04244	1.06482	1.07946	1.43817	TOR4A_C21	2.4348	7.1012	7.44414	15.5749	7.50801
sp|Q16881|TRXR1_HUMAN	TXNRD1	TRXR1_HUMAN Thioredoxin reductase 1, cytoplasmic	209;214	R.WGLGGTC#VNVGC#IPK.K	436.662	414.93	419.864	379.962	411.456	410.431	430.9	380.541	382.862	360.398	381.558	377.892	306.191	312.45	265.554	423.819	400.616	398.101	373.283	294.732	1.05792	1.0646	1.13538	1.43798	TXNRD1_C209;214	2.68826	4.4668	7.14107	3.02931	8.6389
sp|P35556|FBN2_HUMAN	FBN2	FBN2_HUMAN Fibrillin-2	793;795	R.C#NC#NSGYEPDASGR.N	28.7273	25.8814	24.6418	24.2286	24.311	23.9666	16.0882	23.2256	27.813	19.9955	17.4652	19.4356	18.6659	19.3481	17.1597	26.4168	24.1687	22.3756	18.9654	18.3912	1.09302	1.18061	1.39289	1.43638	FBN2_C793;795	7.92953	0.743957	26.4058	7.00794	6.08865
sp|Q8IU81|I2BP1_HUMAN	IRF2BP1	I2BP1_HUMAN Interferon regulatory factor 2-binding protein 1	363	R.EPAPAEALPQQYPEPAPAALC#GPPPR.A	15.8667	17.2309	17.5843	17.3516	13.1176	17.7392	10.6273	14.6449	17.25	14.8824	15.5731	16.0487	8.66791	12.3627	14.4609	16.894	16.0695	14.1741	15.5014	11.8305	1.05131	1.19189	1.08984	1.428	IRF2BP1_C363	5.36916	15.9538	23.5384	3.7834	24.7912
sp|O00468|AGRIN_HUMAN	AGRN	AGRIN_HUMAN Agrin	285;296	R.GAPEGTVC#GSDGADYPGEC#QLLR.R	9.63935	15.1397	12.038	11.0002	15.1586	14.3968	12.3406	14.0678	14.2284	11.5264	11.0761	12.5993	12.169	5.23231	8.40947	12.2723	13.5185	13.5456	11.7339	8.60359	0.907817	0.906002	1.04588	1.42642	AGRN_C285;296	22.4706	16.3772	7.72655	6.66841	40.3601
sp|P17936-2|IBP3_HUMAN	IGFBP3	IBP3_HUMAN Isoform 2 of Insulin-like growth factor-binding protein 3	40;43	R.C#EPC#DAR.A	292.793	317.05	265.409	306.488	264.434	254.571	231.963	274.323	315.49	273.461	215.604	273.31	229.046	171.287	215.488	291.751	275.164	273.926	254.125	205.274	1.06028	1.06507	1.14806	1.42128	IGFBP3_C40;43	8.85555	10.0201	15.2468	13.1275	14.7139
sp|O95235|KI20A_HUMAN	KIF20A	KI20A_HUMAN Kinesin-like protein KIF20A	87	R.QEDQGC#VR.I	354.736	269.987	188.918	187.71	186.031	172.665	189.919	171.246	176.47	252.665	193.365	177.805	196.86	184.745	191.173	271.214	182.135	179.212	207.945	190.926	1.48908	1.51337	1.30426	1.42052	KIF20A_C87	30.5721	4.52664	5.3756	18.9967	3.17458
sp|Q12893|TM115_HUMAN	TMEM115	TM115_HUMAN Transmembrane protein 115	156	K.QTMGDC#VVLR.V	275.683	222.989	257.454	240.071	227.908	234.881	221.133	214.458	208.11	189.357	193.442	189.715	173.876	180.856	178.448	252.042	234.287	214.567	190.838	177.727	1.07579	1.17465	1.32071	1.41814	TMEM115_C156	10.6175	2.60487	3.03513	1.1852	1.99487
sp|Q9NSI6|BRWD1_HUMAN	BRWD1	BRWD1_HUMAN Bromodomain and WD repeat-containing protein 1	1593	K.TGPVSLANGC#GR.K	150.477	157.152	153.989	156.164	153.755	146.665	141.92	252.161	149.76	135.709	128.603	131.715	116.714	100.826	107.977	153.872	152.195	181.28	132.009	108.506	1.01102	0.848809	1.16562	1.41811	BRWD1_C1593	2.17007	3.24454	33.9305	2.69854	7.33315
sp|Q7Z3C6|ATG9A_HUMAN	ATG9A	ATG9A_HUMAN Autophagy-related protein 9A	433	R.SFIPDQHMVFC#PEQLLR.V	14.455	17.2548	17.1561	15.1772	16.5049	19.6227	15.4005	12.8245	12.26	18.0252	22.4447	21.5543	16.4892	9.12835	9.00921	16.2886	17.1016	13.495	20.6748	11.5423	0.952461	1.20701	0.78785	1.41121	ATG9A_C433	9.7536	13.3438	12.4059	11.3053	37.1211
sp|P11274|BCR_HUMAN	BCR	BCR_HUMAN Breakpoint cluster region protein	395	R.HC#PVVVSEATIVGVR.K	25.1766	27.9317	21.6529	18.1602	24.3583	20.9891	27.2181	25.8591	21.56	22.3929	19.7319	22.9215	16.5019	16.0381	20.4468	24.9204	21.1692	24.8791	21.6821	17.6623	1.1772	1.00166	1.14936	1.41094	BCR_C395	12.6292	14.6579	11.8719	7.88431	13.7163
sp|Q9H269|VPS16_HUMAN	VPS16	VPS16_HUMAN Vacuolar protein sorting-associated protein 16 homolog	490	R.ILAHWAC#YK.V	95.7949	93.6977	90.8062	84.977	85.6531	78.4537	92.1237	82.6184	79.6	81.5295	86.1703	64.7123	65.8938	66.2507	66.622	93.4329	83.0279	84.7807	77.4707	66.2555	1.12532	1.10205	1.20604	1.41019	VPS16_C490	2.68091	4.78849	7.70916	14.5734	0.549613
sp|Q9NQE9|HINT3_HUMAN	HINT3	HINT3_HUMAN Histidine triad nucleotide-binding protein 3	32	R.SAGLAPDC#EASATAETTVSSVGTC#EAAGK.S	4.66666	11.4873	11.1603	7.65962	5.64188	9.71285	7.42091	7.84175	5.96	10.1334	8.3048	8.06748	4.43504	7.56463	7.38221	9.10474	7.67145	7.07422	8.83523	6.46063	1.18683	1.28703	1.0305	1.40927	HINT3_C32	42.2523	26.5335	13.9608	12.7954	27.189
sp|O00622|CYR61_HUMAN	CYR61	CYR61_HUMAN Protein CYR61	78	K.GLEC#NFGASSTALK.G	116.982	97.3083	85.3269	84.2667	104.294	78.983	98.8281	88.3597	92.94	84.7879	77.955	95.5165	84.3163	56.7882	71.5152	99.8723	89.1812	93.3759	86.0865	70.8732	1.11988	1.06957	1.16014	1.40917	CYR61_C78	16.0028	14.9717	5.62007	10.2832	19.4365
sp|Q9Y2L6|FRM4B_HUMAN	FRMD4B	FRM4B_HUMAN FERM domain-containing protein 4B	929;939	R.C#LGFAGLQVPC#SPSSR.A	255.503	247.155	209.993	203.337	201.869	217.403	159.057	164.219	196.726	238.177	169.735	198.642	160.731	196.427	149.024	237.55	207.536	173.334	202.185	168.727	1.14462	1.37048	1.17492	1.4079	FRMD4B_C929;939	10.199	4.13254	11.7818	16.9934	14.6346
sp|Q9HCC0|MCCB_HUMAN	MCCC2	MCCB_HUMAN Methylcrotonoyl-CoA carboxylase beta chain, mitochondrial	453	K.ITLIIGGSYGAGNYGMC#GR.A	262.663	295.547	263.261	260.383	273.766	298.021	200.498	250.481	271.66	233.924	217.14	199.938	202.356	195.157	186.668	273.824	277.39	240.88	217.001	194.727	0.987144	1.13677	1.26186	1.40619	MCCC2_C453	6.87136	6.87788	15.1692	7.83096	4.03286
sp|Q9Y5X2|SNX8_HUMAN	SNX8	SNX8_HUMAN Sorting nexin-8	200	K.ESAQC#VGDEFLNC#K.L	13.79	10.9749	10.1274	14.2375	11.1867	17.6038	11.854	14.1431	6.93	13.5305	11.683	8.12907	9.13542	7.76511	7.92859	11.6307	14.3426	10.9757	11.1142	8.27637	0.810921	1.05968	1.04648	1.4053	SNX8_C200	16.4854	22.3797	33.5824	24.7006	9.043
sp|Q8WYP5-2|ELYS_HUMAN	AHCTF1	ELYS_HUMAN Isoform 2 of Protein ELYS	556	R.C#LVAGLLSPR.F	29.7033	37.1669	35.7355	26.7814	37.3465	30.0003	24.9226	30.025	29.42	31.3477	22.9566	29.4494	30.4767	17.4281	25.2792	34.2019	31.376	28.1225	27.9179	24.3946	1.09006	1.21617	1.22509	1.40202	AHCTF1_C556	11.5814	17.2592	9.91266	15.7614	26.9286
sp|O94761|RECQ4_HUMAN	RECQL4	RECQ4_HUMAN ATP-dependent DNA helicase Q4	749	K.TTAEAYHAGMC#SR.E	23.6367	26.9308	19.2848	22.1703	24.067	22.1709	11.9755	24.3421	22.7	20.3939	16.1489	17.847	18.4098	14.1002	17.3263	23.2841	22.8027	19.6725	18.13	16.6121	1.02111	1.18358	1.28429	1.40163	RECQL4_C749	16.4711	4.8016	34.1401	11.7849	13.4953
sp|O75427|LRCH4_HUMAN	LRCH4	LRCH4_HUMAN Leucine-rich repeat and calponin homology domain-containing protein 4	283	R.GSALGDLAPSRPPSFSPC#PAEDLFPGHR.Y	94.1849	91.4336	94.4969	98.8976	89.2453	96.6976	86.7919	90.0517	91.99	83.3898	87.8082	67.6067	65.1104	64.7538	69.9853	93.3718	94.9468	89.6112	79.6016	66.6165	0.983411	1.04197	1.17299	1.40163	LRCH4_C283	1.80548	5.32793	2.93147	13.3416	4.38769
sp|Q96PE2|ARHGH_HUMAN	ARHGEF17	ARHGH_HUMAN Rho guanine nucleotide exchange factor 17	176	R.TC#FPLAGLR.S	15.435	14.5855	12.8356	8.94897	11.9094	10.0083	7.16585	13.1046	13.19	13.542	7.44744	13.376	10.8665	8.31308	11.4254	14.2854	10.2889	11.1535	11.4552	10.2017	1.38842	1.2808	1.24707	1.4003	ARHGEF17_C176	9.27841	14.5793	30.9648	30.3075	16.2647
sp|Q8WXH0-2|SYNE2_HUMAN	SYNE2	SYNE2_HUMAN Isoform 2 of Nesprin-2	2993;2994	K.C#C#ILQVLK.L	182.467	176.753	131.763	151.899	168.276	179.688	135.173	138.084	130.48	167.61	151.156	152.001	119.779	127.161	105.137	163.661	166.621	134.579	156.922	117.359	0.982236	1.2161	1.04294	1.39453	SYNE2_C2993;2994	16.969	8.38319	2.85105	5.90463	9.55161
sp|O95714|HERC2_HUMAN	HERC2	HERC2_HUMAN E3 ubiquitin-protein ligase HERC2	1005	K.QC#LPLVQLIQQLLR.N	12.005	21.6161	28.7572	16.5758	21.683	19.1302	17.8296	12.7428	17.84	20.417	23.5708	16.1226	13.9874	16.84	13.9266	20.7928	19.1297	16.1375	20.0368	14.918	1.08694	1.28848	1.03773	1.3938	HERC2_C1005	40.4294	13.3488	18.2176	18.6586	11.1594
sp|Q9H3H3-3|CK068_HUMAN	C11orf68	CK068_HUMAN Isoform 3 of UPF0696 protein C11orf68	215	R.QVIC#VYTDDFTDR.L	10.1267	9.55685	7.21764	8.61024	6.07339	4.91182	10.7974	7.88842	6.24	10.9654	8.36878	8.8188	6.60833	7.2305	5.46381	8.96705	6.53182	8.3086	9.38431	6.43422	1.37283	1.07925	0.955536	1.39365	C11orf68_C215	17.1917	28.9559	27.7731	14.7863	13.9275
sp|Q9NQC3|RTN4_HUMAN	RTN4	RTN4_HUMAN Reticulon-4	1101	K.YSNSALGHVNC#TIK.E	171.733	146.797	133.722	130.672	139.472	134.219	142.163	116.984	124.67	151.123	142.845	141.409	104.331	118.321	101.87	150.75	134.788	127.939	145.126	108.174	1.11843	1.1783	1.03876	1.39359	RTN4_C1101	12.8104	3.28464	10.0859	3.61299	8.20296
sp|Q7L5D6|GET4_HUMAN	GET4	GET4_HUMAN Golgi to ER traffic protein 4 homolog	160	K.EQNYC#ESR.Y	399.7	355.82	331.923	360.734	388.459	384.71	365.665	346.192	325	308.59	309.555	366.165	252.507	285.972	242.545	362.481	377.968	345.619	328.103	260.341	0.959026	1.04879	1.10478	1.39233	GET4_C160	9.48344	3.97972	5.88468	10.0474	8.73828
sp|P45880|VDAC2_HUMAN	VDAC2	VDAC2_HUMAN Voltage-dependent anion-selective channel protein 2	210;227	K.VC#EDLDTSVNLAWTSGTNC#TR.F	929.645	955.635	943.226	933.169	888.122	968.125	865.364	857.248	946.767	850.393	961.475	798.505	686.268	681.491	669.038	942.835	929.806	889.793	870.125	678.932	1.01401	1.05961	1.08356	1.3887	VDAC2_C210;227	1.37876	4.31356	5.56394	9.56843	1.31018
sp|Q15388|TOM20_HUMAN	TOMM20	TOM20_HUMAN Mitochondrial import receptor subunit TOM20 homolog	100	K.GVDHLTNAIAVC#GQPQQLLQVLQQTLPPPVFQMLLTK.L	24.395	21.7591	35.7985	22.2905	21.8556	29.4832	18.3397	23.5369	28.75	26.2059	41.9846	24.1162	20.5579	18.8047	19.694	27.3175	24.5431	23.5422	30.7689	19.6855	1.11304	1.16036	0.887828	1.3877	TOMM20_C100	27.3159	17.4542	22.1098	31.75	4.45316
sp|Q5VU43-2|MYOME_HUMAN	PDE4DIP	MYOME_HUMAN Isoform 2 of Myomegalin	273;274;284	K.CDC#C#SDDQAPQHGC#NHK.L	15.3688	18.1014	12.7769	16.5994	10.9112	13.6161	12.2639	11.8378	12.0973	13.9149	13.8164	11.3774	13.5919	10.5024	9.2678	15.4157	13.7089	12.0663	13.0363	11.1207	1.1245	1.27758	1.18252	1.38622	PDE4DIP_C273;274;284	17.2715	20.7548	1.7795	11.0264	20.0288
sp|Q9Y573|IPP_HUMAN	IPP	IPP_HUMAN Actin-binding protein IPP	312	R.ALSC#VER.F	16.2517	20.1623	14.0322	11.9538	11.8987	16.8282	13.9431	11.9143	12.12	15.5872	17.0575	13.3514	12.1174	9.19517	15.1044	16.8154	13.5602	12.6591	15.332	12.139	1.24005	1.32832	1.09675	1.38524	IPP_C312	18.4575	20.872	8.82099	12.1718	24.3404
sp|Q8IY21|DDX60_HUMAN	DDX60	DDX60_HUMAN Probable ATP-dependent RNA helicase DDX60	1051	R.AQELC#PENFIHFNNK.L	127.505	136.417	119.677	98.2201	112.298	116.296	105.97	120.158	115.44	102.917	114.45	98.5834	93.8307	86.7527	96.3452	127.866	108.938	113.856	105.317	92.3095	1.17375	1.12305	1.21411	1.38519	DDX60_C1051	6.55074	8.7157	6.34644	7.787	5.38826
sp|Q16513|PKN2_HUMAN	PKN2	PKN2_HUMAN Serine/threonine-protein kinase N2	118	K.LQELNAHIVVSDPEDITDC#PR.T	15.1433	20.8296	13.4024	13.2541	16.6128	11.8672	10.8581	13.3263	14.78	10.041	11.5934	10.2845	13.1409	12.7503	9.82271	16.4585	13.9114	12.9881	10.6396	11.9046	1.1831	1.26719	1.5469	1.38253	PKN2_C118	23.601	17.5407	15.2655	7.84747	15.2338
sp|Q0P651|CD029_HUMAN	C4orf29	CD029_HUMAN Uncharacterized protein C4orf29	393	R.SLQEIWPGC#EIR.Y	161.945	208.523	201.074	182.946	178.663	217.474	149.511	255.043	211.16	174.533	176.87	149.378	135.591	131.125	147.061	190.514	193.028	205.238	166.927	137.926	0.986976	0.928257	1.1413	1.38128	C4orf29_C393	13.133	11.0239	25.8308	9.13152	5.96039
sp|P52948|NUP98_HUMAN	NUP98	NUP98_HUMAN Nuclear pore complex protein Nup98-Nup96	1068	K.FTSGAFLSPSVSVQEC#R.T	207.912	190.529	183.212	172.161	182.946	189.099	171.81	174.292	183.6	160.725	145.839	154.489	147.847	133.53	141.039	193.884	181.402	176.568	153.685	140.806	1.06881	1.09807	1.26157	1.37696	NUP98_C1068	6.54352	4.7264	3.52013	4.8641	5.08591
sp|Q9H3M7|TXNIP_HUMAN	TXNIP	TXNIP_HUMAN Thioredoxin-interacting protein	120	K.YGC#VDYWVK.A	49.105	42.8986	42.9406	45.0508	39.3637	46.6315	49.4565	48.6725	41.31	39.9444	45.7212	48.836	30.464	32.4771	35.4055	44.9814	43.682	46.4797	44.8338	32.7822	1.02975	0.967764	1.00329	1.37213	TXNIP_C120	7.93929	8.75039	9.66918	10.0632	7.57975
sp|Q8NAN2|FA73A_HUMAN	FAM73A	FA73A_HUMAN Protein FAM73A	150	K.GSQVC#NYANGGLFSK.Y	162.365	172.571	163.927	157.858	140.583	158.459	119.986	147.465	158.19	138.921	137.471	126.727	122.627	114.084	126.882	166.288	152.3	141.88	134.373	121.198	1.09184	1.17203	1.23751	1.37204	FAM73A_C150	3.30602	6.66541	13.8885	4.9572	5.37747
sp|Q7Z6Z7|HUWE1_HUMAN	HUWE1	HUWE1_HUMAN E3 ubiquitin-protein ligase HUWE1	2181;2190	R.LQAVMC#IISTIMESC#PSTSSFYSSATAK.T	32.5692	28.9891	35.0966	37.9025	34.3875	35.0702	25.6279	22.1462	33.6236	36.4286	88.2236	28.5439	25.2621	20.8255	24.7259	32.2183	35.7868	27.1325	51.0653	23.6045	0.900286	1.18744	0.630923	1.36492	HUWE1_C2181;2190	9.52507	5.20814	21.689	63.4883	10.2591
sp|P19013|K2C4_HUMAN_contaminant	KRT4	K2C4_HUMAN_contaminant Keratin, type II cytoskeletal 4	17	R.GFSC#GSAIVGGGK.R	15.9367	20.1742	18	18.9469	14.8652	10.156	13.6273	17.1305	23.32	16.2574	16.3537	25.2001	14.4044	15.6906	9.59202	18.037	14.6561	18.0259	19.2704	13.229	1.23068	1.00061	0.935995	1.36344	KRT4_C17	11.7483	30.0161	27.2275	26.6498	24.3004
sp|Q99439|CNN2_HUMAN	CNN2	CNN2_HUMAN Calponin-2	164;175	K.AGQC#VIGLQMGTNKC#ASQSGMTAYGTR.R	19.8897	10.4069	23.2476	26.3143	14.4471	20.5967	17.3994	14.5871	14.3412	16.281	63.4026	13.1267	14.1703	12.548	12.6498	17.848	20.4527	15.4426	30.9368	13.1227	0.872651	1.15577	0.576919	1.36009	CNN2_C164;175	37.3115	29.0178	11.0027	91.0258	6.92461
sp|P04040|CATA_HUMAN	CAT	CATA_HUMAN Catalase	377	R.LGPNYLHIPVNC#PYR.A	13.4867	18.792	16.9293	14.467	15.6096	11.8179	17.3438	19.9311	13.05	11	14.0631	16.4182	13.0777	12.777	10.3691	16.4027	13.9648	16.775	13.8271	12.0746	1.17457	0.977805	1.18627	1.35844	CAT_C377	16.4094	13.9283	20.7192	19.6484	12.2955
sp|Q96EX2|RNFT2_HUMAN	RNFT2	RNFT2_HUMAN RING finger and transmembrane domain-containing protein 2	161	K.AVIC#WLQK.G	54.2966	48.1894	55.0329	44.1985	50.928	54.941	42.898	42.8845	49.88	51.7994	59.1445	40.5837	33.4081	41.1511	41.4157	52.5063	50.0225	45.2208	50.5092	38.6583	1.04965	1.16111	1.03954	1.35822	RNFT2_C161	7.15465	10.8515	8.92279	18.5063	11.7665
sp|P0CJ79|ZN888_HUMAN	ZNF888	ZN888_HUMAN Zinc finger protein 888	406	R.TQSQLAC#HHR.L	17.8733	16.5994	11.0469	8.58839	15.7174	15.9419	8.45328	11.4125	12.78	16.5116	13.6281	17.5144	11.4603	9.66295	12.3968	15.1732	13.4159	10.8819	15.8847	11.1734	1.13099	1.39435	0.955209	1.35798	ZNF888_C406	23.9225	31.1739	20.3238	12.7016	12.4343
sp|O75182|SIN3B_HUMAN	SIN3B	SIN3B_HUMAN Paired amphipathic helix protein Sin3b	249	R.SLFTGNGPC#EM*HSVQK.N	11.305	14.3353	7.45697	9.51716	11.2298	2.43744	6.59501	9.51045	8.48	7.89182	10.8641	7.21762	5.88811	9.20854	9.28847	11.0324	7.72814	8.19516	8.65783	8.12837	1.42756	1.34621	1.27427	1.35727	SIN3B_C249	31.2465	60.3148	18.0405	22.4092	23.8736
sp|Q16666|IF16_HUMAN	IFI16	IF16_HUMAN Gamma-interferon-inducible protein 16	366	K.LQLFC#FR.L	49.0116	32.1263	32.3219	48.6238	30.6906	29.9264	33.6431	14.0381	30	26.2521	46.1946	22.6752	31.8792	24.3512	27.3798	37.8199	36.4136	25.8937	31.7073	27.87	1.03862	1.46058	1.19278	1.35701	IFI16_C366	25.6287	29.0586	40.2707	39.9694	13.5913
sp|Q6N075-2|MFSD5_HUMAN	MFSD5	MFSD5_HUMAN Isoform 2 of Molybdate-anion transporter	140	R.AC#SNPSFLR.F	121.52	130.829	133.117	119.615	113.075	119.509	140.657	130.101	115.89	117.002	111.763	105.776	98.43	94.2371	91.4763	128.489	117.399	128.883	111.514	94.7145	1.09446	0.996942	1.15222	1.35659	MFSD5_C140	4.78059	3.19033	9.64323	5.03712	3.69675
sp|Q9H3M7|TXNIP_HUMAN	TXNIP	TXNIP_HUMAN Thioredoxin-interacting protein	36	R.VIVEVC#EVTR.V	19.7517	21.4016	20.9853	24.8692	19.04	21.2969	21.8741	20.9113	19.86	24.958	23.0333	16.4182	15.1625	14.1937	16.4643	20.7129	21.7353	20.8818	21.4699	15.2735	0.952958	0.99191	0.964741	1.35613	TXNIP_C36	4.14267	13.5228	4.82411	20.8638	7.45962
sp|Q3KRA9-2|ALKB6_HUMAN	ALKBH6	ALKB6_HUMAN Isoform 2 of Alpha-ketoglutarate-dependent dioxygenase alkB homolog 6	240	R.PGAC#LVR.G	43.6216	41.7665	37.6375	42.0132	36.6021	40.6241	36.5823	42.4061	35.74	38.812	29.5083	33.0212	29.3142	31.8891	29.6017	41.0086	39.7465	38.2428	33.7805	30.2683	1.03175	1.07232	1.21397	1.35483	ALKBH6_C240	7.46967	7.07045	9.4921	13.9078	4.66145
sp|O95685|PPR3D_HUMAN	PPP1R3D	PPR3D_HUMAN Protein phosphatase 1 regulatory subunit 3D	60	R.APPPTPAPSGC#DPR.L	10.5117	8.59163	10.2281	8.44634	6.90403	6.81992	5.25901	9.39376	9.99	9.42859	6.66687	5.96131	6.87368	5.59997	9.20348	9.77714	7.3901	8.21426	7.35226	7.22571	1.32301	1.19027	1.32982	1.35311	PPP1R3D_C60	10.6005	12.3909	31.3677	24.9234	25.2898
sp|Q9BY89|K1671_HUMAN	KIAA1671	K1671_HUMAN Uncharacterized protein KIAA1671	585	K.VSSNQDPDSC#R.G	8.85499	9.75943	10.732	6.73085	8.26326	9.12195	12.352	9.53379	9.57	7.32564	8.35598	10.4693	9.76719	5.42622	6.49586	9.78214	8.03869	10.4853	8.71696	7.22976	1.21688	0.932942	1.1222	1.35304	KIAA1671_C585	9.59611	15.068	15.4191	18.3848	31.2822
sp|Q5TAX3|TUT4_HUMAN	ZCCHC11	TUT4_HUMAN Terminal uridylyltransferase 4	1362	R.CFIC#GDAGHVR.R	21.8867	23.0937	29.4122	21.4163	19.5902	20.706	22.4206	18.1574	22.72	19.458	18.2347	18.6845	15.4531	20.3951	19.2083	24.7975	20.5708	21.0993	18.7924	18.3522	1.20547	1.17528	1.31955	1.3512	ZCCHC11_C1362	16.299	4.47504	12.0961	3.2925	14.0573
sp|Q14872|MTF1_HUMAN	MTF1	MTF1_HUMAN Metal regulatory transcription factor 1	231;236	K.TFNC#ESEGC#SK.Y	22.7062	25.6475	25.0387	15.305	18.7947	20.0893	20.4366	18.3704	14.6133	17.4347	22.4603	26.7512	14.5125	22.7156	17.1727	24.4641	18.063	17.8068	22.2154	18.1336	1.35438	1.37386	1.10122	1.3491	MTF1_C231;236	6.34626	13.7003	16.5794	20.9905	23.0793
sp|P02462|CO4A1_HUMAN	COL4A1	CO4A1_HUMAN Collagen alpha-1(IV) chain	39;41	K.C#DC#HGVK.G	146.463	176.437	181.93	148.251	129.546	141.681	147.483	132.773	140.451	145.496	149.385	157.246	126.586	130.46	117.899	168.277	139.826	140.236	150.709	124.982	1.20347	1.19996	1.11657	1.34641	COL4A1_C39;41	11.3441	6.78675	5.24654	3.97206	5.14652
sp|P48509|CD151_HUMAN	CD151	CD151_HUMAN CD151 antigen	11;15	K.TTC#GTVC#LK.Y	40.7263	40.651	46.5853	44.4833	43.0553	42.0331	29.0392	43.8333	32.845	35.6757	38.2736	36.6578	27.4741	42.5639	25.0032	42.6542	43.1906	35.2391	36.869	31.6804	0.987581	1.21042	1.15691	1.34639	CD151_C11;15	7.98189	2.84949	21.8001	3.55788	30.0059
sp|O43520|AT8B1_HUMAN	ATP8B1	AT8B1_HUMAN Probable phospholipid-transporting ATPase IC	655;657	R.TLC#LC#YK.E	20.8815	26.6587	21.9008	22.7271	22.603	16.4558	21.6951	15.1845	18.9467	18.7343	17.5358	19.0898	14.623	15.5751	21.4164	23.147	20.5953	18.6088	18.4533	17.2048	1.1239	1.24388	1.25435	1.34538	ATP8B1_C655;657	13.3219	17.4092	17.5641	4.41227	21.3795
sp|Q13219|PAPP1_HUMAN	PAPPA	PAPP1_HUMAN Pappalysin-1	1442;1458	K.C#EDSDASQGLGSNVIHC#R.K	10.7906	9.91994	7.29976	4.78427	8.72279	11.6345	6.83605	10.1404	7.23911	6.52645	7.8363	6.2046	7.29695	6.64085	6.8878	9.33676	8.38051	8.07186	6.85578	6.94187	1.1141	1.15671	1.36188	1.34499	PAPPA_C1442;1458	19.4608	41.0226	22.3334	12.6064	4.77353
sp|Q86YV5|SG223_HUMAN	SGK223	SG223_HUMAN Tyrosine-protein kinase SgK223	284;288	R.DC#SPTC#WEQGK.C	25.7871	24.599	22.8274	25.1347	20.4501	25.6083	21.7343	20.9638	26.013	28.6069	26.4443	22.2855	21.3639	11.9027	21.2723	24.4045	23.731	22.9037	25.7789	18.1796	1.02838	1.06553	0.946686	1.34241	SGK223_C284;288	6.10295	12.0149	11.8764	12.463	29.9027
sp|O00443|P3C2A_HUMAN	PIK3C2A	P3C2A_HUMAN Phosphatidylinositol 4-phosphate 3-kinase C2 domain-containing subunit alpha	514	R.LQLLTFSAMC#QNLAR.T	87.7566	95.6877	89.9875	88.1129	92.4924	91.8966	72.3508	73.8781	81.17	88.5548	123.177	62.5569	80.1466	58.5524	65.4564	91.1439	90.834	75.7997	91.4296	68.0518	1.00341	1.20243	0.996876	1.33933	PIK3C2A_C514	4.48745	2.61492	6.21788	33.263	16.2061
sp|P51797-5|CLCN6_HUMAN	CLCN6	CLCN6_HUMAN Isoform 5 of Chloride transport protein 6	759	R.GVC#YSESQSSASQPR.L	34.93	38.859	33.8965	34.3536	38.134	32.8686	32.1856	35.1478	33.29	34.5022	25.7717	32.6887	31.1337	23.1216	26.1656	35.8951	35.1187	33.5411	30.9875	26.807	1.02211	1.07018	1.15837	1.33902	CLCN6_C759	7.29417	7.73036	4.46314	14.8676	15.0871
sp|O14682|ENC1_HUMAN	ENC1	ENC1_HUMAN Ectoderm-neural cortex protein 1	136	R.DAC#AEFLEK.N	9.34499	13.7395	16.3373	12.1614	11.7908	7.70626	7.65167	10.9341	9.43	10.0988	10.8129	11.2698	10.399	8.58038	10.5148	13.1406	10.5528	9.33859	10.7272	9.83138	1.24522	1.40713	1.22498	1.3366	ENC1_C136	26.897	23.4264	17.595	5.5022	11.0355
sp|Q8IXI2-3|MIRO1_HUMAN	RHOT1	MIRO1_HUMAN Isoform 3 of Mitochondrial Rho GTPase 1	620	R.C#M*C#TCNR.C	52.0566	39.7765	40.1064	35.3042	39.5471	39.6023	35.9993	45.2767	39.66	36.9055	36.1495	35.5216	30.7041	37.3821	30.658	43.9799	38.1512	40.312	36.1922	32.9148	1.15278	1.09099	1.21517	1.33617	RHOT1_C620	15.9087	6.46311	11.592	1.91469	11.7543
sp|Q9NRM7|LATS2_HUMAN	LATS2	LATS2_HUMAN Serine/threonine-protein kinase LATS2	848	R.QDSMEPSDLWDDVSNC#R.C	19.6	21.2586	21.8923	17.7231	17.6808	14.2061	12.2062	18.4841	21.51	17.9559	14.7541	17.5391	16.742	18.3235	11.9354	20.917	16.5367	17.4001	16.7497	15.667	1.26488	1.20212	1.2488	1.3351	LATS2_C848	5.65911	12.2058	27.2737	10.3927	21.2356
sp|P02769|ALBU_BOVIN_contaminant	ALB	ALBU_BOVIN_contaminant Serum albumin	268;269;276	K.EC#C#HGDLLEC#ADDR.A	192.294	273.163	221.701	239.34	266.31	295.307	171.783	320.208	280.724	189.93	168.046	225.252	198.49	139.884	176.317	229.053	266.985	257.572	194.409	171.564	0.857922	0.889277	1.1782	1.33509	ALB_C268;269;276	17.8704	10.4836	29.8453	14.8475	17.2477
sp|P16144|ITB4_HUMAN	ITGB4	ITB4_HUMAN Integrin beta-4	748	K.AC#LALLPC#C#NR.G	27.4516	34.3189	28.3919	24.1262	32.3303	33.4595	29.38	25.1473	24.38	27.9853	30.468	22.515	22.0488	18.1631	27.3433	30.0541	29.972	26.3024	26.9895	22.5184	1.00274	1.14264	1.11355	1.33465	ITGB4_C748	12.3882	16.9959	10.2376	15.076	20.4636
sp|Q9BTE3|MCMBP_HUMAN	MCMBP	MCMBP_HUMAN Mini-chromosome maintenance complex-binding protein	325	K.LQHINPLLPAC#LNK.E	73.6633	76.3714	60.9154	68.3902	72.4707	61.7855	61.0069	64.3093	61	63.6776	57.3018	60.4753	59.5003	46.3902	52.1733	70.3167	67.5488	62.1054	60.4849	52.6879	1.04098	1.13222	1.16255	1.33459	MCMBP_C325	11.7377	7.98245	3.07323	5.27059	12.47
sp|Q03001|DYST_HUMAN	DST	DYST_HUMAN Dystonin	2071;2073	K.C#HC#GEPEHEETPENR.K	7.92369	10.4987	4.42637	5.91714	10.2404	10.7211	8.81419	8.42045	7.17476	9.04252	10.7898	8.00858	0	7.12421	10.0071	7.61624	8.95955	8.13647	9.28029	5.71043	0.850069	0.936062	0.82069	1.33374	DST_C2071;2073	40.0171	29.5298	10.5183	15.1477	90.2062
sp|Q9UK41-2|VPS28_HUMAN	VPS28	VPS28_HUMAN Isoform 2 of Vacuolar protein sorting-associated protein 28 homolog	128	R.C#IADVVSLFITVMDK.L	14.4433	14.0016	22.7236	13.3087	11.0788	11.9656	17.0644	16.6754	16.4	15.5179	20.666	13.7455	11.9152	14.1402	12.3361	17.0562	12.1177	16.7133	16.6431	12.7972	1.40754	1.02052	1.02482	1.33281	VPS28_C128	28.8054	9.26505	1.99747	21.5996	9.23653
sp|Q6PGN9|PSRC1_HUMAN	PSRC1	PSRC1_HUMAN Proline/serine-rich coiled-coil protein 1	178	R.ESPTC#NLFPASK.S	23.2517	30.6963	27.2708	26.7704	31.4457	21.223	22.8457	22.1833	21.04	28.6671	18.721	23.0077	20.6842	17.5751	22.778	27.0729	26.4797	22.023	23.4653	20.3458	1.0224	1.2293	1.15375	1.33064	PSRC1_C178	13.7638	19.3263	4.14778	21.2604	12.8672
sp|Q9GZX9|TWSG1_HUMAN	TWSG1	TWSG1_HUMAN Twisted gastrulation protein homolog 1	53	R.PGEGNC#SCCK.E	7.81666	5.71981	11.4374	5.71467	6.79615	7.20154	11.7569	8.88031	8.26	6.65547	9.43087	13.5977	9.32495	6.4687	2.97474	8.32462	6.57079	9.63239	9.89468	6.25613	1.26691	0.864232	0.841322	1.33063	TWSG1_C53	34.7455	11.6977	19.3701	35.3147	50.8371
sp|P35556|FBN2_HUMAN	FBN2	FBN2_HUMAN Fibrillin-2	2298;2305	K.DLDEC#AEGLHDC#ESR.G	16.8598	20.1598	17.8084	18.0445	18.8781	15.8491	18.5991	22.1103	17.8329	14.0648	19.8918	15.4821	9.99698	17.7513	13.4578	18.276	17.5905	19.5141	16.4796	13.7354	1.03897	0.936555	1.10901	1.33058	FBN2_C2298;2305	9.29592	8.89497	11.6877	18.4402	28.2819
sp|Q8IX01|SUGP2_HUMAN	SUGP2	SUGP2_HUMAN SURP and G-patch domain-containing protein 2	381	R.DFC#FFTIK.F	37.2166	25.6319	19.5494	55.4749	38.6841	28.4615	34.809	19.5927	25.83	20.9948	43.8273	23.8822	21.6445	19.5264	20.811	27.466	40.8735	26.7439	29.5681	20.6606	0.671975	1.027	0.928905	1.32939	SUGP2_C381	32.6779	33.3691	28.6018	42.0485	5.16462
sp|Q9P227|RHG23_HUMAN	ARHGAP23	RHG23_HUMAN Rho GTPase-activating protein 23	378	R.C#GWASQR.S	58.275	69.8174	51.7453	57.8787	51.8773	56.6767	52.6994	58.1013	57.54	49.1419	40.6922	44.3157	46.1825	39.5473	49.6114	59.9459	55.4776	56.1136	44.7166	45.1137	1.08054	1.0683	1.34057	1.32877	ARHGAP23_C378	15.2658	5.72367	5.29291	9.47986	11.3413
sp|Q96N19-4|G137A_HUMAN	GPR137	G137A_HUMAN Isoform 4 of Integral membrane protein GPR137	440;443	R.PLC#QVC#LPLLAQDPGGR.G	86.8204	96.4101	94.0626	75.3805	76.2803	94.9031	58.7629	67.2367	90.1611	80.813	86.3304	76.3975	69.0184	65.644	74.0913	92.431	82.188	72.0536	81.1803	69.5845	1.12463	1.28281	1.13859	1.32833	GPR137_C440;443	5.40807	13.4093	22.5442	6.13031	6.11057
sp|Q0VDG4|SCRN3_HUMAN	SCRN3	SCRN3_HUMAN Secernin-3	143	K.YGQGGNC#TEGR.M	61.6816	74.4529	66.7978	72.6844	61.5106	65.1093	69.5574	69.1521	62.53	60.2112	62.1772	65.2542	46.8143	54.6899	51.3355	67.6441	66.4348	67.0798	62.5475	50.9466	1.0182	1.00841	1.08148	1.32775	SCRN3_C143	9.502	8.58532	5.88174	4.06381	7.7575
sp|Q9HCE6|ARGAL_HUMAN	ARHGEF10L	ARGAL_HUMAN Rho guanine nucleotide exchange factor 10-like protein	359	K.C#QVVFFR.V	12.4717	13.9659	12.1176	11.1015	8.12302	6.42599	7.95531	11.2725	7.25	9.65968	7.2683	8.73259	10.4621	8.90114	9.68915	12.8517	8.55018	8.82594	8.55352	9.68414	1.50309	1.45613	1.5025	1.32709	ARHGEF10L_C359	7.63328	27.682	24.3367	14.096	8.0597
sp|P35555|FBN1_HUMAN	FBN1	FBN1_HUMAN Fibrillin-1	1971;1977	R.TC#VDINEC#LLEPR.K	23.8211	32.737	26.895	27.8899	33.0851	24.6703	28.9721	32.425	31.2726	27.7722	23.7752	32.7133	24.7497	17.719	20.4277	27.8177	28.5484	30.8899	28.0869	20.9655	0.974404	0.900543	0.990415	1.32683	FBN1_C1971;1977	16.281	14.8726	5.69118	15.9411	16.9137
sp|P30153|2AAA_HUMAN	PPP2R1A	2AAA_HUMAN Serine/threonine-protein phosphatase 2A 65 kDa regulatory subunit A alpha isoform	154	R.TSACGLFSVC#YPR.A	46.6433	50.2152	46.2912	39.8497	41.9204	41.6089	41.3069	42.5461	47.68	38.5694	41.8439	36.1251	37.0597	29.8308	41.0757	47.7165	41.1263	43.8443	38.8461	35.9888	1.16024	1.08832	1.22835	1.32587	PPP2R1A_C154	4.54984	2.71484	7.70697	7.38666	15.8339
sp|Q9NZU5|LMCD1_HUMAN	LMCD1	LMCD1_HUMAN LIM and cysteine-rich domains protein 1	52;58	K.C#SQEDHC#LTSDLEDDRK.I	10.3215	10.4891	8.40921	8.87332	6.35277	8.37109	13.433	7.42485	9.64434	11.7265	5.56607	7.32106	7.1915	6.20893	8.66965	9.73993	7.86572	10.1674	8.20456	7.35669	1.23828	0.957958	1.18714	1.32396	LMCD1_C52;58	11.8634	16.961	29.8801	38.6839	16.837
sp|Q9NT68|TEN2_HUMAN	TENM2	TEN2_HUMAN Teneurin-2	1228	R.SISC#PSC#NGLAEGNK.L	9.50833	12.0593	10.2659	8.40263	6.00866	8.33409	9.49779	9.07869	7.97	13.8078	12.5148	10.5924	8.45311	7.35079	8.28071	10.6112	7.5818	8.84883	12.305	8.0282	1.39956	1.19916	0.862347	1.32174	TENM2_C1228	12.3459	17.9747	8.92105	13.1485	7.38588
sp|Q14149|MORC3_HUMAN	MORC3	MORC3_HUMAN MORC family CW-type zinc finger protein 3	671	R.NDAVILPSC#VEAEAK.I	10.57	11.5945	9.98881	9.83403	7.86412	11.5102	10.9795	8.83363	7.92	7.96115	7.38346	8.64637	8.99643	5.65343	9.67701	10.7178	9.7361	9.24439	7.99699	8.10896	1.10083	1.15938	1.34023	1.32172	MORC3_C671	7.5855	18.7446	16.9896	7.90567	26.5584
sp|Q5VY09|IER5_HUMAN	IER5	IER5_HUMAN Immediate early response gene 5 protein	220;231	R.C#AAGVGGGPAGC#PAPGSTPLK.K	45.4537	51.5014	34.9682	32.98	42.916	36.1033	34.3833	36.0987	36.8982	39.2036	39.8955	48.1178	35.6062	28.4146	35.8293	43.9745	37.3331	35.7934	42.4056	33.2834	1.1779	1.22856	1.037	1.32121	IER5_C220;231	19.023	13.6095	3.58996	11.6941	12.6728
sp|Q9HCM1|K1551_HUMAN	KIAA1551	K1551_HUMAN Uncharacterized protein KIAA1551	483;494	K.TQC#MLNSDIQEVNC#R.R	13.7831	17.6552	13.4283	8.37604	16.1097	7.85738	16.3581	12.5554	11.1767	14.9607	16.4489	14.2769	10.4525	14.3467	9.17714	14.9555	10.781	13.3634	15.2288	11.3254	1.38721	1.11914	0.982055	1.32053	KIAA1551_C483;494	15.6777	42.8719	20.0814	7.29247	23.7789
sp|Q93008|USP9X_HUMAN	USP9X	USP9X_HUMAN Probable ubiquitin carboxyl-terminal hydrolase FAF-X	577	R.EIC#SLFGEAPQNLSQTQR.S	113.435	114.742	129.351	118.413	114.596	117.256	104.342	102.841	110.43	106.152	105.083	105.062	86.9823	93.2748	90.5414	119.176	116.755	105.871	105.433	90.2662	1.02074	1.12567	1.13035	1.32027	USP9X_C577	7.41419	1.67618	3.79593	0.591427	3.49552
sp|O95340-2|PAPS2_HUMAN	PAPSS2	PAPS2_HUMAN Isoform B of Bifunctional 3'-phosphoadenosine 5'-phosphosulfate synthase 2	502	K.STIVAIFPSPMLYAGPTEVQWHC#R.S	92.2599	111.608	96.3738	98.4605	92.5679	111.532	66.0716	87.9513	99.79	97.7407	88.4992	66.0302	73.2729	71.7036	82.4792	100.081	100.853	84.6043	84.09	75.8186	0.992337	1.18292	1.19016	1.32	PAPSS2_C502	10.1844	9.62351	20.2195	19.3942	7.67808
sp|Q01082|SPTB2_HUMAN	SPTBN1	SPTB2_HUMAN Spectrin beta chain, non-erythrocytic 1	1970	R.NDSFTTC#IELGK.S	19.845	14.0255	18.6172	16.9364	20.3345	15.8188	6.86222	20.2695	14.11	17.2857	14.3063	13.6962	13.9369	13.5522	12.3118	17.4959	17.6966	13.7472	15.0961	13.267	0.988661	1.27268	1.15897	1.31876	SPTBN1_C1970	17.5329	13.2901	48.8171	12.723	6.40139
sp|Q8N5N7|RM50_HUMAN	MRPL50	RM50_HUMAN 39S ribosomal protein L50, mitochondrial	52	K.KEPILVC#PPLR.S	11.7483	22.0332	12.5458	10.3913	13.9051	12.9628	11.769	12.8945	11.44	15.4601	7.99768	10.4446	13.76	10.2777	11.1097	15.4425	12.4197	12.0345	11.3008	11.7158	1.24338	1.28318	1.36649	1.31809	MRPL50_C52	37.0515	14.6442	6.33804	33.6629	15.5219
sp|P51116|FXR2_HUMAN	FXR2	FXR2_HUMAN Fragile X mental retardation syndrome-related protein 2	270	R.KVPGVTAIELGEETC#TFR.I	47.4133	54.7791	52.5893	50.7218	48.8352	62.241	50.5739	51.3098	52.75	53.1629	51.0828	49.3533	42.733	34.4418	40.2743	51.5939	53.9327	51.5446	51.1997	39.1497	0.956636	1.00096	1.0077	1.31786	FXR2_C270	7.33118	13.4553	2.14741	3.7256	10.8775
sp|Q7L576|CYFP1_HUMAN	CYFIP1	CYFP1_HUMAN Cytoplasmic FMR1-interacting protein 1	428	K.DC#PDSAEEYER.A	9.26333	10.4863	9.44718	8.06391	10.0108	6.37675	6.74076	10.8874	7.56	8.354	8.49674	12.0088	6.58306	7.63146	7.97716	9.73227	8.1505	8.39606	9.61986	7.39723	1.19407	1.15915	1.01169	1.31567	CYFIP1_C428	6.77602	22.3126	26.1566	21.5195	9.81403
sp|Q9NV58|RN19A_HUMAN	RNF19A	RN19A_HUMAN E3 ubiquitin-protein ligase RNF19A	460	R.SGGC#GVSAGNGKGVR.I	56.6066	58.5923	63.019	51.4757	57.2926	55.8027	43.4202	56.2342	65.21	55.8782	37.3012	42.4066	43.3143	39.3601	52.829	59.406	54.857	54.9548	45.1954	45.1678	1.08292	1.081	1.31443	1.31523	RNF19A_C460	5.52585	5.50809	19.9274	21.2353	15.3275
sp|P23142-3|FBLN1_HUMAN	FBLN1	FBLN1_HUMAN Isoform B of Fibulin-1	354;367	R.C#VDVDECAPPAEPC#GK.G	6.48467	8.89634	10.3492	6.38031	6.02619	12.5937	8.32285	7.68075	11.7542	6.63454	9.01601	7.46066	7.13705	4.30026	8.14092	8.57675	8.33339	9.25259	7.70374	6.52608	1.0292	0.926956	1.11332	1.31423	FBLN1_C354;367	22.7593	44.3248	23.6701	15.6963	30.5221
sp|O43379-4|WDR62_HUMAN	WDR62	WDR62_HUMAN Isoform 4 of WD repeat-containing protein 62	1215	R.NLPTPTSAPTPGLAQGVHAPSTC#SYMEATASSR.A	15.8083	17.7791	17.534	10.2274	13.0853	16.4835	14.5746	13.8514	13.19	11.8088	14.8821	11.4792	9.47658	14.9822	14.4609	17.0405	13.2654	13.872	12.7234	12.9732	1.28458	1.22841	1.3393	1.31351	WDR62_C1215	6.30307	23.6099	4.99235	14.7504	23.4282
sp|Q9BXW9|FACD2_HUMAN	FANCD2	FACD2_HUMAN Fanconi anemia group D2 protein	893	K.NSEC#DPTPSHR.G	44.6366	54.648	51.3045	49.8258	40.9495	45.499	41.2462	45.2651	44.94	47.7784	37.8514	45.338	36.0615	34.7225	43.9654	50.1964	45.4247	43.8171	43.656	38.2498	1.10504	1.14559	1.14982	1.31233	FANCD2_C893	10.1538	9.77132	5.09482	11.8491	13.0588
sp|Q96LW1|Z354B_HUMAN	ZNF354B	Z354B_HUMAN Zinc finger protein 354B	87	K.DSSGVSSLGC#K.S	15.7267	13.9301	15.2288	11.8445	14.2611	17.456	12.9593	18.0524	16.56	16.188	14.639	10.7033	11.2708	9.80996	13.1738	14.9619	14.5206	15.8572	13.8434	11.4182	1.03039	0.943538	1.08079	1.31035	ZNF354B_C87	6.19938	19.3844	16.5115	20.4256	14.7727
tr|H7C561|H7C561_HUMAN	SF1	H7C561_HUMAN Splicing factor 1 (Fragment)	175	K.YAC#GLWGLSPASR.K	55.2183	57.5794	50.0448	54.4915	43.1717	44.5018	44.2097	30.025	54.87	38.4769	45.5548	41.5568	45.9045	33.6666	44.7789	54.2809	47.3883	43.0349	41.8628	41.45	1.14545	1.26132	1.29664	1.30955	SF1_C175	7.0997	13.0567	28.9627	8.47731	16.3187
sp|Q4AC94|C2CD3_HUMAN	C2CD3	C2CD3_HUMAN C2 domain-containing protein 3	1614	K.SPASTQVPC#SSTTAEVR.L	14.56	18.78	11.0721	13.1667	11.0357	9.20812	14.8904	16.5003	12.76	9.48636	12.3996	12.6124	12.8755	9.76987	11.304	14.804	11.1368	14.7169	11.4994	11.3165	1.32929	1.00592	1.28737	1.30819	C2CD3_C1614	26.0724	17.7898	12.7486	15.1888	13.7221
sp|Q8N392|RHG18_HUMAN	ARHGAP18	RHG18_HUMAN Rho GTPase-activating protein 18	489	K.MTVMNVAMVMAPNLFMC#HALGLK.S	35.385	37.8342	44.4521	36.3641	44.0887	37.7804	30.2788	39.022	40.97	38.3845	95.5499	36.2359	30.464	32.0762	27.4526	39.2238	39.411	36.7569	56.7235	29.9976	0.995248	1.06711	0.691491	1.30756	ARHGAP18_C489	11.9585	10.4346	15.4914	59.3086	7.82333
sp|P35556|FBN2_HUMAN	FBN2	FBN2_HUMAN Fibrillin-2	175	K.GYIGTYC#GQPVC#ENGC#QNGGR.C	46.025	61.1186	53.6726	47.9354	49.7413	48.4904	37.0681	43.9931	54.76	39.2511	42.6756	41.9386	42.8341	37.8232	42.3506	53.6054	48.7224	45.2737	41.2884	41.0026	1.10022	1.18403	1.29831	1.30736	FBN2_C175	14.0789	1.89859	19.6918	4.36554	6.74126
sp|Q9NS15|LTBP3_HUMAN	LTBP3	LTBP3_HUMAN Latent-transforming growth factor beta-binding protein 3	1228;1237;1239	R.C#VPRPGGAVC#EC#PGGFQLDASR.A	76.1228	79.2807	78.8166	89.0721	77.5814	83.0968	69.4868	81.3404	88.0579	84.7632	70.1861	69.6419	59.5869	51.6455	68.2103	78.0734	83.2501	79.6283	74.8637	59.8142	0.937817	0.980472	1.04287	1.30526	LTBP3_C1228;1237;1239	2.18396	6.90314	11.8088	11.4575	13.8507
sp|P29279|CTGF_HUMAN	CTGF	CTGF_HUMAN Connective tissue growth factor	43;54	R.C#PAGVSLVLDGC#GCCR.V	106.683	124.7	105.701	102.998	108.29	106.788	88.4691	96.3263	106.295	110.219	93.1066	92.448	73.549	98.2623	86.6813	112.361	106.025	97.0303	98.5913	86.1642	1.05976	1.158	1.13967	1.30404	CTGF_C43;54	9.52015	2.572	9.20744	10.2194	14.3503
sp|Q5VU43-2|MYOME_HUMAN	PDE4DIP	MYOME_HUMAN Isoform 2 of Myomegalin	92	K.FC#IASMYR.K	10.64	12.8696	11.7019	14.762	13.1932	9.33123	11.684	12.031	7.99	10.2605	12.9243	14.152	9.69138	7.19041	10.1263	11.7372	12.4288	10.5683	12.4456	9.00268	0.944352	1.1106	0.943078	1.30374	PDE4DIP_C92	9.50153	22.4873	21.1919	15.9847	17.5999
sp|P49746|TSP3_HUMAN	THBS3	TSP3_HUMAN Thrombospondin-3	266;269	R.NTIM*EC#QVC#GFHEQR.S	179.671	189.467	175.524	165.547	177.143	170.193	142.954	173.798	181.536	167.402	146.202	145.372	136.912	135.434	145.533	181.554	170.961	166.096	152.992	139.293	1.06196	1.09307	1.18669	1.3034	THBS3_C266;269	3.9435	3.41366	12.2889	8.16135	3.91571
tr|E7EVA0|E7EVA0_HUMAN	MAP4	E7EVA0_HUMAN Microtubule-associated protein	1435	R.NITFTC#PR.T	184.683	228.161	225.901	236.924	201.522	225.698	149.256	164.817	232.44	177.78	139.403	147.247	168.519	166.435	155.561	212.915	221.381	182.171	154.81	163.505	0.961758	1.16876	1.37533	1.30219	MAP4_C1435	11.4954	8.17199	24.2761	13.097	4.25572
sp|Q92973|TNPO1_HUMAN	TNPO1	TNPO1_HUMAN Transportin-1	467	R.SITC#WTLSR.Y	155.692	152.624	185.328	154.58	101.306	109.882	134.754	81.5565	109.42	104.916	203.423	107.944	122.399	127.917	129.007	164.548	121.923	108.577	138.761	126.441	1.34961	1.51549	1.18584	1.30138	TNPO1_C467	10.9766	23.4619	24.507	40.371	2.80152
sp|Q76FK4|NOL8_HUMAN	NOL8	NOL8_HUMAN Nucleolar protein 8	517	K.SDGPETTTQC#K.F	22.8667	30.2197	13.4906	17.8105	16.7099	12.1995	13.19	21.8332	19.4	13.1838	19.5655	16.2828	17.9676	17.7221	15.4808	22.1923	15.5733	18.1411	16.344	17.0568	1.42502	1.22332	1.35782	1.30108	NOL8_C517	37.783	19.0914	24.5685	19.5257	8.03427
sp|Q9C0D5|TANC1_HUMAN	TANC1	TANC1_HUMAN Protein TANC1	1003	K.GQC#ALVHSALR.G	16.1583	16.0274	16.8034	13.6475	10.6689	18.9579	12.1698	12.4861	13.64	14.27	13.3721	16.7754	10.9549	14.5412	12.1661	16.3297	14.4247	12.7653	14.8058	12.5541	1.13206	1.27922	1.10292	1.30075	TANC1_C1003	2.5439	29.1085	6.06206	11.9129	14.5319
sp|O00622|CYR61_HUMAN	CYR61	CYR61_HUMAN Protein CYR61	267;272	R.IC#EVRPC#GQPVYSSLK.K	179.827	194.486	176.99	163.721	188.385	163.89	143.042	156.837	154.644	162.57	149.064	155.25	141.519	133.637	148.766	183.767	171.999	151.508	155.628	141.307	1.06842	1.21293	1.18081	1.30048	CYR61_C267;272	5.10979	8.25081	4.89291	4.34407	5.3548
sp|Q86VW0|SESD1_HUMAN	SESTD1	SESD1_HUMAN SEC14 domain and spectrin repeat-containing protein 1	112	K.VTHFC#FWK.E	89.7166	75.7994	82.1526	83.1194	79.5257	75.4869	88.2372	41.2625	63.81	68.8541	81.8579	73.6173	71.2007	58.8999	60.3447	82.5562	79.3774	64.4366	74.7764	63.4818	1.04005	1.2812	1.10404	1.30047	SESTD1_C112	8.43954	4.81047	36.46	8.79814	10.5915
sp|Q9Y6G3|RM42_HUMAN	MRPL42	RM42_HUMAN 39S ribosomal protein L42, mitochondrial	45	K.STYSPLPDDYNC#NVELALTSDGR.T	7.28	9.53302	11.7145	8.56654	9.46067	7.36157	7.46949	9.1487	8.44	6.23951	9.25172	10.1983	8.22567	7.13695	6.58085	9.50917	8.46293	8.35273	8.56317	7.31449	1.12363	1.13845	1.11047	1.30005	MRPL42_C45	23.318	12.447	10.0925	24.1413	11.4383
sp|P02769|ALBU_BOVIN_contaminant	ALB	ALBU_BOVIN_contaminant Serum albumin	415	K.QNC#DQFEK.L	49.4083	85.8925	85.9819	66.4562	64.5634	71.9785	40.5174	62.2322	51.33	41.4118	55.2672	43.4905	66.3108	53.5138	50.4977	73.7609	67.666	51.3599	46.7232	56.7741	1.09007	1.43616	1.57868	1.2992	ALB_C415	28.5924	5.69373	21.1399	15.992	14.7876
sp|P10071|GLI3_HUMAN	GLI3	GLI3_HUMAN Transcriptional activator GLI3	870	R.SSGISPC#FSSR.R	101.675	90.5994	70.9042	74.5529	92.8268	83.4148	80.6219	85.8858	82.46	90.6461	82.165	79.9728	70.5184	55.3581	76.8819	87.7262	83.5981	82.9892	84.2613	67.5861	1.04938	1.05708	1.04112	1.29799	GLI3_C870	17.7658	10.9313	3.21914	6.68994	16.3605
sp|Q9NVV5|AIG1_HUMAN	AIG1	AIG1_HUMAN Androgen-induced gene 1 protein	6	-.MALVPC#QVLR.M	146.498	158.88	140.486	146.582	131.867	154.852	123.653	136.484	124.54	123.981	147.375	120.039	112.139	112.521	118.929	148.621	144.433	128.226	130.465	114.53	1.02899	1.15906	1.13916	1.29767	AIG1_C6	6.31061	8.06044	5.58807	11.3259	3.33069
sp|Q5EE01|CENPW_HUMAN	CENPW	CENPW_HUMAN Centromere protein W	63	R.TNAC#ASK.C	30.555	25.6081	21.4766	24.0934	20.6258	21.8631	21.4125	23.6886	24.22	18.1639	21.8049	17.5637	17.816	21.2906	20.7382	25.8799	22.1941	23.1071	19.1775	19.9482	1.16607	1.12	1.34949	1.29735	CENPW_C63	17.5631	7.91802	6.45407	11.9676	9.35995
sp|P14324|FPPS_HUMAN	FDPS	FPPS_HUMAN Farnesyl pyrophosphate synthase	62	R.ALC#SSLR.M	92.6449	92.363	78.2982	77.7435	72.9238	78.6507	83.8405	90.1451	72.92	76.8846	73.6043	84.8871	77.4678	69.4182	56.2044	87.7687	76.4393	82.3019	78.4587	67.6968	1.14821	1.06642	1.11866	1.2965	FDPS_C62	9.34608	4.02692	10.5891	7.39727	15.8586
tr|Q5LJA9|Q5LJA9_HUMAN	UCHL5	Q5LJA9_HUMAN Ubiquitin carboxyl-terminal hydrolase isozyme L5 (Fragment)	228;229	K.DGFSPC#C#PGWSQTPELK.P	323.533	306.747	317.929	324.103	313.332	329.019	287.604	297.711	298.937	295.317	269.143	291.997	241.632	251.882	238.044	316.07	322.151	294.751	285.486	243.853	0.981122	1.07233	1.10713	1.29615	UCHL5_C228;229	2.70395	2.49058	2.11018	4.99153	2.9448
tr|J3KNL6|J3KNL6_HUMAN	SEC16A	J3KNL6_HUMAN Protein transport protein Sec16A	718;750	K.C#ESPATTLWAQSELPDFGGNVLLAPAAPALYVC#AK.P	84.6039	78.6993	77.3457	92.6542	77.4556	75.8152	57.745	69.2884	86.9064	79.2622	80.7297	56.8496	65.0039	54.7291	66.0513	80.2163	81.975	71.3133	72.2805	61.9281	0.978546	1.12484	1.10979	1.29531	SEC16A_C718;750	4.81145	11.3263	20.5933	18.5164	10.1028
sp|Q05048|CSTF1_HUMAN	CSTF1	CSTF1_HUMAN Cleavage stimulation factor subunit 1	402;415	R.C#IVHSPTNPGFMTC#SDDFR.A	27.0176	36.8921	26.7339	27.3206	27.7654	35.742	28.4464	29.3383	28.0098	31.3644	30.7697	24.0408	26.8916	21.4038	21.7254	30.2146	30.276	28.5982	28.725	23.3403	0.99797	1.05652	1.05186	1.29453	CSTF1_C402;415	19.1453	15.6524	2.36762	14.1601	13.1951
sp|Q14517|FAT1_HUMAN	FAT1	FAT1_HUMAN Protocadherin Fat 1	3826	R.FGQC#PGSSSMTLTGNSYVK.Y	56.2333	62.8941	50.07	55.8573	48.1448	42.8646	48.157	48.5091	54.17	50.6209	47.4998	48.9345	42.1265	43.9043	44.7061	56.3991	48.9556	50.2787	49.0184	43.579	1.15205	1.12173	1.15057	1.29418	FAT1_C3826	11.3719	13.3472	6.71171	3.18697	3.02941
sp|P50552|VASP_HUMAN	VASP	VASP_HUMAN Vasodilator-stimulated phosphoprotein	334	K.SSSSVTTSETQPC#TPSSSDYSDLQR.V	9.43833	11.0941	9.95102	9.96515	9.16941	9.51588	10.2022	8.79863	10.12	12.5483	9.36689	10.5555	9.83037	5.35939	8.3657	10.1611	9.55015	9.70695	10.8236	7.85182	1.06398	1.04679	0.938797	1.29411	VASP_C334	8.34181	4.17771	8.11489	14.8526	29.0296
sp|Q8IXI2-3|MIRO1_HUMAN	RHOT1	MIRO1_HUMAN Isoform 3 of Mitochondrial Rho GTPase 1	618;620	R.C#M*C#TCNR.C	18.5514	24.267	27.6355	20.5996	22.894	22.4947	22.3048	16.8296	16.4321	19.8836	14.0252	20.743	19.9928	19.5641	14.8892	23.4846	21.9961	18.5222	18.2173	18.1487	1.06767	1.26792	1.28914	1.29401	RHOT1_C618;620	19.5546	5.57286	17.7187	20.0678	15.5987
sp|Q9GZR1|SENP6_HUMAN	SENP6	SENP6_HUMAN Sentrin-specific protease 6	127	K.LSENTQNTSLC#SGTVVHGR.R	19.355	23.8206	21.3254	20.2144	20.6366	16.7174	14.2588	25.4157	21.14	14.5126	19.5271	18.7708	15.2636	15.2896	19.3055	21.5003	19.1895	20.2715	17.6035	16.6196	1.12042	1.06062	1.22137	1.29368	SENP6_C127	10.4089	11.2105	27.7675	15.357	13.9961
sp|Q8IZV5|RDH10_HUMAN	RDH10	RDH10_HUMAN Retinol dehydrogenase 10	108;117	R.DLEAADAAALQAGNGEEEILPHC#NLQVFTYTC#DVGK.R	65.1392	74.0249	65.9124	82.0073	58.7191	67.421	53.9928	68.3345	80.9976	75.8393	61.0569	49.3	52.8568	52.1769	53.4941	68.3588	69.3825	67.775	62.0654	52.8426	0.985246	1.00862	1.1014	1.29363	RDH10_C108;117	7.2005	16.9601	19.9352	21.4264	1.24656
sp|O00622|CYR61_HUMAN	CYR61	CYR61_HUMAN Protein CYR61	50;52;53	R.DGC#GC#C#K.V	152.889	158.443	136.711	128.242	128.165	132.204	132.061	112.678	127.145	144.603	133.372	154.614	131.268	106.019	109.129	149.348	129.537	123.962	144.196	115.472	1.15294	1.20479	1.03572	1.29337	CYR61_C50;52;53	7.55968	1.78322	8.12869	7.36964	11.923
sp|Q8IWZ3-6|ANKH1_HUMAN	ANKHD1	ANKH1_HUMAN Isoform 6 of Ankyrin repeat and KH domain-containing protein 1	1390	K.EVNQFPSDIEC#MR.Y	33.8916	38.9662	39.8545	28.9885	34.7467	35.3429	28.9792	38.812	35.72	36.3509	30.5448	30.4101	31.2727	28.2671	27.6469	37.5708	33.0261	34.5037	32.4352	29.0622	1.13761	1.08889	1.15833	1.29277	ANKHD1_C1390	8.56259	10.6258	14.5722	10.4569	6.67285
sp|Q6VMQ6|MCAF1_HUMAN	ATF7IP	MCAF1_HUMAN Activating transcription factor 7-interacting protein 1	608;612	K.LC#ALQC#AVFDK.T	333.61	301.905	288.407	314.231	323.582	326.599	312.437	298.949	291.739	296.227	275.989	316.794	254.421	226.584	233.858	307.974	321.47	301.041	296.337	238.287	0.958016	1.02303	1.03927	1.29245	ATF7IP_C608;612	7.53466	2.00592	3.49005	6.88504	6.05878
sp|Q9BZG8|DPH1_HUMAN	DPH1	DPH1_HUMAN Diphthamide biosynthesis protein 1	219	K.PLSPGEILGC#TSPR.L	50.4116	62.0242	54.2646	53.6938	51.8449	60.7268	39.9345	56.7826	47.64	45.3635	40.8074	36.3345	43.5038	43.9577	41.5249	55.5668	55.4219	48.119	40.8351	42.9955	1.00262	1.15478	1.36076	1.29239	DPH1_C219	10.6445	8.45574	17.528	11.0557	3.00868
sp|Q07617|SPAG1_HUMAN	SPAG1	SPAG1_HUMAN Sperm-associated antigen 1	657	K.EC#AIYTNR.A	17.64	21.0561	19.0455	24.9675	21.5427	22.491	16.3479	12.1477	17.47	18.4412	17.4925	16.369	14.6824	13.4052	16.61	19.2472	23.0004	15.3219	17.4342	14.8992	0.836819	1.25619	1.10399	1.29183	SPAG1_C657	8.92047	7.68821	18.3109	5.95002	10.8286
sp|Q14693-2|LPIN1_HUMAN	LPIN1	LPIN1_HUMAN Isoform 2 of Phosphatidate phosphatase LPIN1	728	K.FLYC#SAR.A	23.0533	26.5137	23.6683	19.832	22.9775	17.7146	19.9429	25.7891	23.76	15.6681	18.9129	20.4828	14.8845	22.5736	19.2933	24.4118	20.1747	23.164	18.3546	18.9172	1.21002	1.05387	1.33001	1.29046	LPIN1_C728	7.56237	13.126	12.8142	13.3777	20.3958
sp|O15228|GNPAT_HUMAN	GNPAT	GNPAT_HUMAN Dihydroxyacetone phosphate acyltransferase	54	K.C#YTPLVYK.G	36.1083	34.5691	41.7313	39.3034	39.1911	40.6487	35.9386	44.7516	30.46	27.8005	31.1846	37.2089	25.9911	26.6232	34.4948	37.4696	39.7144	37.0501	32.0647	29.0364	0.943476	1.01132	1.16856	1.29044	GNPAT_C54	10.0619	2.04226	19.4611	14.8624	16.3165
sp|Q07954|LRP1_HUMAN	LRP1	LRP1_HUMAN Prolow-density lipoprotein receptor-related protein 1	2753;2769	K.QWLC#DGSDDCGDGSDEAAHC#EGK.T	17.4969	19.5261	20.9341	14.6084	15.2829	15.5123	18.6717	26.2737	18.9712	19.9247	18.8018	25.0767	20.8442	9.59373	14.5033	19.319	15.1346	21.3055	21.2677	14.9804	1.27648	0.90676	0.908373	1.28962	LRP1_C2753;2769	8.94426	3.10451	20.2068	15.7334	37.6518
sp|Q9UPZ3|HPS5_HUMAN	HPS5	HPS5_HUMAN Hermansky-Pudlak syndrome 5 protein	579;588	R.GDEQSC#EEDVSSDTC#PK.E	13.3305	22.7263	19.7432	15.4682	13.8399	16.5405	20.2793	20.0149	12.1734	14.7866	16.0223	16.35	13.3209	13.1733	16.8356	18.6	15.2829	17.4892	15.7197	14.4432	1.21705	1.06352	1.18323	1.2878	HPS5_C579;588	25.8122	8.89785	26.3335	5.24475	14.3536
sp|Q96GJ1|TRM2_HUMAN	TRMT2B	TRM2_HUMAN tRNA (uracil(54)-C(5))-methyltransferase homolog	451	R.AIHTLVFVSC#K.L	36.1433	29.1591	29.6767	33.0096	28.5546	26.8119	23.8902	33.6892	23.78	24.5998	46.2074	29.0183	26.9767	27.4251	19.354	31.6597	29.4587	27.1198	33.2752	24.5853	1.07472	1.1674	0.951451	1.28775	TRMT2B_C451	12.2917	10.8498	20.9792	34.3062	18.4498
sp|Q9NPH3-5|IL1AP_HUMAN	IL1RAP	IL1AP_HUMAN Isoform 4 of Interleukin-1 receptor accessory protein	47	K.C#PLFEHFLK.F	30.9516	31.1611	40.3961	32.6599	34.0023	29.6556	25.6878	33.024	38.06	29.3488	30.1481	27.9467	23.7546	29.5502	26.2991	34.1696	32.1059	32.2573	29.1479	26.5346	1.06428	1.05928	1.17229	1.28774	IL1RAP_C47	15.784	6.93236	19.2876	3.82304	10.9478
sp|Q12805|FBLN3_HUMAN	EFEMP1	FBLN3_HUMAN EGF-containing fibulin-like extracellular matrix protein 1	332;338;344	R.TC#QDINEC#ETTNEC#R.E	78.9343	80.1848	80.2375	79.6698	64.5221	74.8282	73.621	69.5182	75.5646	74.4635	57.9834	78.0675	69.5806	54.5935	61.728	79.7856	73.0067	72.9013	70.1715	61.9674	1.09285	1.09443	1.13701	1.28754	EFEMP1_C332;338;344	0.924557	10.5969	4.23416	15.2596	12.0974
sp|Q86TI0|TBCD1_HUMAN	TBC1D1	TBCD1_HUMAN TBC1 domain family member 1	604	R.ANTLSHFPIEC#QEPPQPAR.G	170.835	188.229	160.01	179.941	185.934	194.306	126.459	164.957	210.5	168.779	116.395	119.349	143.854	115.514	143.905	173.025	186.727	167.305	134.841	134.424	0.926619	1.03419	1.28318	1.28715	TBC1D1_C604	8.22809	3.86413	25.1454	21.8241	12.1828
sp|Q16644|MAPK3_HUMAN	MAPKAPK3	MAPK3_HUMAN MAP kinase-activated protein kinase 3	379	K.QAGSSSASQGC#NNQ.-	8.02666	13.6084	15.7831	12.0522	18.2525	9.28199	17.1738	9.89554	13.05	12.8141	12.3228	13.0311	9.0217	9.24863	10.8062	12.4727	13.1956	13.3731	12.7227	9.69218	0.945221	0.932672	0.980352	1.28688	MAPKAPK3_C379	32.0779	34.8092	27.2925	2.85232	10.0227
sp|P22692|IBP4_HUMAN	IGFBP4	IBP4_HUMAN Insulin-like growth factor-binding protein 4	215	K.QC#HPALDGQR.G	168.98	158.82	152.011	147.008	149.731	131.253	129.253	132.084	148.68	133.479	126.325	128.119	122.703	113.456	136.972	159.937	142.664	136.672	129.308	124.377	1.12108	1.17022	1.23687	1.28591	IGFBP4_C215	5.33912	6.99247	7.67888	2.87862	9.52493
sp|O95980|RECK_HUMAN	RECK	RECK_HUMAN Reversion-inducing cysteine-rich protein with Kazal motifs	225	R.AEDHAC#QNAC#K.R	10.0567	7.87666	12.8104	10.9376	10.1511	8.74033	8.47757	9.70883	10.31	9.46325	8.01048	10.925	8.78163	8.03241	7.11509	10.2479	9.94301	9.4988	9.46623	7.97638	1.03066	1.07886	1.08257	1.28478	RECK_C225	24.126	11.1971	9.83383	15.3942	10.4644
sp|Q9NU22|MDN1_HUMAN	MDN1	MDN1_HUMAN Midasin	2954	K.VTADFMAQAC#LR.R	27.2183	23.3559	25.0791	24.3775	18.3712	22.5402	24.0846	20.1995	21.13	16.9507	22.1504	18.9801	20.4189	15.7173	22.7537	25.2178	21.763	21.8047	19.3604	19.63	1.15875	1.15653	1.30254	1.28466	MDN1_C2954	7.67292	14.1417	9.30306	13.5361	18.2574
sp|Q96QE3|ATAD5_HUMAN	ATAD5	ATAD5_HUMAN ATPase family AAA domain-containing protein 5	827;831	K.SQDC#DVQC#K.A	12.1764	11.0556	7.65044	11.4004	12.3399	9.61256	10.9761	11.5363	8.76424	10.0752	14.0308	13.674	9.15906	4.92819	9.9561	10.2941	11.1176	10.4255	12.5933	8.01445	0.925931	0.987397	0.817428	1.28445	ATAD5_C827;831	22.8975	12.462	14.0591	17.3746	33.7182
sp|P01130|LDLR_HUMAN	LDLR	LDLR_HUMAN Low-density lipoprotein receptor	89;95	R.C#DGQVDC#DNGSDEQGCPPK.T	13.2549	13.7464	7.37705	14.3675	8.8571	9.37695	12.3449	16.9129	16.0394	12.5082	11.8562	8.18941	11.4849	7.17061	8.12851	11.4595	10.8672	15.0991	10.8513	8.92799	1.0545	0.758951	1.05605	1.28354	LDLR_C89;95	30.9264	27.9971	16.0596	21.4553	25.3755
sp|Q6ZRI6|CO039_HUMAN	C15orf39	CO039_HUMAN Uncharacterized protein C15orf39	417;426	R.AC#QPLPASQPC#SEPVRPAQEAEEK.T	80.1345	78.5052	77.9902	81.0497	80.4294	59.516	77.0904	74.1164	74.1819	85.3069	80.0215	61.4838	64.6275	58.227	61.5404	78.8766	73.665	75.1296	75.604	61.465	1.07075	1.04988	1.04329	1.28328	C15orf39_C417;426	1.41912	16.6393	2.26075	16.5478	5.20777
sp|O94903|PROSC_HUMAN	PROSC	PROSC_HUMAN Proline synthase co-transcribed bacterial homolog protein	15	R.AGSMSAELGVGC#ALR.A	31.7916	37.6793	30.0924	29.7097	37.8535	28.7815	36.4365	28.9281	25.7	31.0935	32.3746	28.4764	25.3593	26.4228	25.8256	33.1878	32.1149	30.3549	30.6482	25.8692	1.03341	1.09333	1.08286	1.28291	PROSC_C15	11.9967	15.5422	18.1475	6.48302	2.06058
sp|Q9H0H0|INT2_HUMAN	INTS2	INT2_HUMAN Integrator complex subunit 2	988	K.GMEEGEDNLLC#NLR.E	9.85833	10.3076	10.4801	9.0036	10.5071	7.59547	11.2467	10.1289	11.47	8.78153	10.5697	13.4745	10.5127	7.83193	5.5488	10.2153	9.03538	10.9486	10.9419	7.96447	1.13059	0.933029	0.933594	1.28261	INTS2_C988	3.14206	16.1151	6.56295	21.6465	31.196
sp|Q14678|KANK1_HUMAN	KANK1	KANK1_HUMAN KN motif and ankyrin repeat domain-containing protein 1	386	K.IQDSSC#EASSELR.E	21.21	16.3015	15.6319	12.9044	13.4844	17.2468	14.7204	10.4907	12.77	10.4569	12.6683	11.2329	12.1427	13.1512	16.1486	17.7145	14.5452	12.6603	11.4527	13.8142	1.21789	1.39921	1.54675	1.28234	KANK1_C386	17.1931	16.2082	16.7213	9.79647	15.0832
sp|P14618|KPYM_HUMAN	PKM	KPYM_HUMAN Pyruvate kinase PKM	49	R.NTGIIC#TIGPASR.S	13.58	11.5945	13.0119	15.6907	11.1975	12.9997	11.7204	10.9458	10.54	12.9412	14.3574	16.6892	9.70401	11.0663	9.00921	12.7288	13.296	11.0687	14.6626	9.9265	0.957343	1.14998	0.868113	1.28231	PKM_C49	8.03339	17.007	5.41833	12.9073	10.5417
sp|Q8IUI8|CRLF3_HUMAN	CRLF3	CRLF3_HUMAN Cytokine receptor-like factor 3	313	R.APTYFC#GQTLTFR.V	40.5066	48.5946	49.1127	44.0892	42.1685	37.3249	34.7848	40.2706	52.18	51.5452	45.6956	37.8125	34.9875	35.7516	37.0932	46.0713	41.1942	42.4118	45.0178	35.9441	1.11839	1.08629	1.0234	1.28175	CRLF3_C313	10.4753	8.46193	20.9684	15.3083	2.96559
sp|O14508|SOCS2_HUMAN	SOCS2	SOCS2_HUMAN Suppressor of cytokine signaling 2	111	R.LDSIIC#VK.S	51.5083	61.7263	54.4787	55.3656	64.941	66.7466	66.9339	48.5908	55.28	53.0127	42.6628	54.2307	44.7547	41.0441	45.0946	55.9044	62.3511	56.9349	49.9687	43.6312	0.896608	0.981901	1.11879	1.2813	SOCS2_C111	9.4019	9.8099	16.3043	12.7206	5.14968
sp|Q99501|GA2L1_HUMAN	GAS2L1	GA2L1_HUMAN GAS2-like protein 1	608;624	R.SQALSSSSDEGSPC#PGMGGPLDAPGSPLAC#TEPSR.T	95.9671	87.9588	80.5261	82.2797	80.1105	83.1218	84.3775	74.7877	90.7905	85.334	81.8557	73.1652	71.0947	63.3118	72.019	88.1507	81.8373	83.3186	80.1183	68.8085	1.07714	1.058	1.10026	1.2811	GAS2L1_C608;624	8.76035	1.89843	9.66627	7.82302	6.95067
sp|A1L390|PKHG3_HUMAN	PLEKHG3	PKHG3_HUMAN Pleckstrin homology domain-containing family G member 3	359	R.DSLC#FTVTHYK.H	33.74	35.439	34.69	30.5183	30.4532	27.452	31.8577	26.7226	31.19	36.7206	26.258	36.2359	29.1373	29.7373	22.2195	34.623	29.4745	29.9234	33.0715	27.0314	1.17468	1.15705	1.04691	1.28085	PLEKHG3_C359	2.45932	5.94353	9.33055	17.8572	15.4561
sp|Q9NZV1|CRIM1_HUMAN	CRIM1	CRIM1_HUMAN Cysteine-rich motor neuron 1 protein	260;268	R.TVEC#PPVQQTAC#PPDSYETQVR.L	12.5314	15.8803	14.3511	14.7222	13.5828	18.5073	14.8451	12.4709	15.4902	13.2208	12.427	15.2268	10.5702	11.406	11.4156	14.2542	15.6041	14.2688	13.6249	11.1306	0.913492	0.998982	1.04619	1.28063	CRIM1_C260;268	11.7616	16.5214	11.1434	10.5908	4.36025
sp|O75444-1|MAF_HUMAN	MAF	MAF_HUMAN Isoform 1 of Transcription factor Maf	46	R.IISQC#GR.L	14.1283	19.4593	12.4073	13.5491	13.6031	12.3965	10.3723	12.031	14.5	14.1544	11.9645	15.8147	17.7149	11.6276	6.58085	15.3316	13.1829	12.3011	13.9779	11.9744	1.16299	1.24636	1.09685	1.28036	MAF_C46	23.9815	5.17017	16.8853	13.8158	46.5584
sp|Q9UKP4|ATS7_HUMAN	ADAMTS7	ATS7_HUMAN A disintegrin and metalloproteinase with thrombospondin motifs 7	1664;1665;1668	R.TQC#C#RSC#SPPSHGAPSR.G	7.62172	5.44476	6.49654	9.39353	7.78715	8.47488	7.95379	6.51243	8.68553	13.4098	8.248	3.57381	5.616	4.9975	4.67084	6.52101	8.55185	7.71725	8.41055	5.09478	0.762526	0.844991	0.775336	1.27994	ADAMTS7_C1664;1665;1668	16.6951	9.42429	14.3275	58.4983	9.42199
sp|Q8NDV7|TNR6A_HUMAN	TNRC6A	TNR6A_HUMAN Trinucleotide repeat-containing gene 6A protein	395	K.GPVGSGSSGINIQC#STIGQMPNNQSINSK.V	37.3683	25.7034	29.9287	30.0375	27.0983	31.1451	32.7079	27.5395	28.37	32.4801	30.468	28.3532	22.2636	22.7073	27.7076	31.0001	29.427	29.5391	30.4338	24.2262	1.05346	1.04946	1.01861	1.27961	TNRC6A_C395	19.0509	7.10692	9.39591	6.78083	12.4789
sp|P09622|DLDH_HUMAN	DLD	DLDH_HUMAN Dihydrolipoyl dehydrogenase, mitochondrial	80;85	K.NETLGGTC#LNVGC#IPSK.A	262.297	289.187	287.937	242.369	197.882	229.757	248.565	220.604	261.512	291.96	282.999	296.015	223.429	234.185	198.896	279.807	223.336	243.56	290.324	218.837	1.25285	1.14882	0.963774	1.27861	DLD_C80;85	5.42398	10.2663	8.58442	2.29405	8.26511
sp|Q9HCE0|EPG5_HUMAN	EPG5	EPG5_HUMAN Ectopic P granules protein 5 homolog	472	R.VGC#PGDHLFLLNHILR.C	109.993	84.0812	86.0953	96.6685	103.938	96.5622	93.8363	76.9821	85.58	89.664	143.28	86.9071	73.4498	70.5943	75.1941	93.3899	99.0562	85.4661	106.617	73.0794	0.942797	1.09271	0.875938	1.27792	EPG5_C472	15.4344	4.26831	9.86079	29.8086	3.1776
sp|P47895|AL1A3_HUMAN	ALDH1A3	AL1A3_HUMAN Aldehyde dehydrogenase family 1 member A3	164	K.TIPTDDNVVC#FTR.H	507.5	492.583	486.655	479.486	428.837	489.766	482.165	423.291	423.36	392.557	414.318	418.635	369.081	415.346	379.795	495.579	466.03	442.939	408.503	388.074	1.06341	1.11884	1.21316	1.27702	ALDH1A3_C164	2.16722	6.99898	7.66945	3.4216	6.24063
sp|P35442|TSP2_HUMAN	THBS2	TSP2_HUMAN Thrombospondin-2	610	R.C#VNTQPGFHC#LPC#PPR.Y	63.3266	68.4709	73.4486	67.9204	58.9431	61.7609	62.4037	48.1474	73.24	62.5337	51.6586	57.1991	55.5327	49.0097	56.2529	68.4154	62.8748	61.2637	57.1305	53.5985	1.08812	1.11674	1.19753	1.27644	THBS2_C610	7.3978	7.30201	20.5425	9.51831	7.44471
sp|Q8N4S9|MALD2_HUMAN	MARVELD2	MALD2_HUMAN MARVEL domain-containing protein 2	395	K.MC#EMATSGDR.Q	30.345	32.2693	31.2513	25.5685	23.2256	21.3215	27.2424	20.7013	26.55	29.6261	23.0077	24.4734	23.2239	30.1783	20.1918	31.2885	23.3718	24.8312	25.7024	24.5314	1.33873	1.26005	1.21734	1.27545	MARVELD2_C395	3.0768	9.10187	14.4711	13.5245	20.8714
sp|P47895|AL1A3_HUMAN	ALDH1A3	AL1A3_HUMAN Aldehyde dehydrogenase family 1 member A3	196;197	K.LAPALC#C#GNTMVLK.P	185.484	189.857	203.938	186.618	176.647	194.71	234.137	166.272	191.091	165.979	160.955	154.285	151.742	160.022	142.577	193.093	185.992	197.166	160.406	151.447	1.03818	0.979339	1.20378	1.27499	ALDH1A3_C196;197	4.99398	4.86442	17.4156	3.65702	5.7616
sp|O00622|CYR61_HUMAN	CYR61	CYR61_HUMAN Protein CYR61	355;359	K.C#NYNC#PHANEAAFPFYR.L	54.0566	55.1059	48.0718	43.6675	45.3106	54.4213	32.4716	35.5933	50.0044	49.0237	33.556	47.7935	43.4912	43.9383	35.9125	52.4114	47.7998	39.3564	43.4577	41.114	1.09648	1.33171	1.20603	1.27478	CYR61_C355;359	7.24015	12.1192	23.7638	19.7829	10.9699
sp|Q5VY43|PEAR1_HUMAN	PEAR1	PEAR1_HUMAN Platelet endothelial aggregation receptor 1	278;284	R.C#HNGGLC#DR.F	53.884	53.4673	54.9869	47.2945	48.4211	43.0901	53.9247	48.5908	47.7396	59.3897	44.6531	74.7964	50.4158	43.5376	33.4329	54.1127	46.2686	50.085	59.6131	42.4621	1.16954	1.08042	0.907733	1.27438	PEAR1_C278;284	1.45104	6.07251	6.6933	25.2845	20.1177
sp|Q4L180|FIL1L_HUMAN	FILIP1L	FIL1L_HUMAN Filamin A-interacting protein 1-like	990	R.AQTPESC#GSLTPER.T	22.225	19.7214	20.3555	28.2127	18.2741	22.4663	19.6757	13.8748	18.19	20.5557	16.0849	16.837	14.3791	10.1307	24.3807	20.7673	22.9844	17.2468	17.8259	16.2969	0.90354	1.20412	1.16501	1.27431	FILIP1L_C990	6.26748	21.7084	17.4717	13.4288	44.8921
sp|P13804|ETFA_HUMAN	ETFA	ETFA_HUMAN Electron transfer flavoprotein subunit alpha, mitochondrial	155	R.TIYAGNALC#TVK.C	95.5849	64.8603	80.1876	77.0442	66.7533	66.5619	74.8285	61.9755	61.89	62.8919	75.5621	73.7528	64.9461	66.1571	57.7464	80.2109	70.1198	66.2313	70.7356	62.9499	1.14391	1.21107	1.13395	1.2742	ETFA_C155	19.1524	8.55315	11.2417	9.68794	7.22297
sp|Q13895|BYST_HUMAN	BYSL	BYST_HUMAN Bystin	381	R.ELPVLWHQC#LLTLVQR.Y	9.72999	9.41386	10.5934	10.3694	10.766	7.95247	9.26703	6.39476	8.53	4.98005	17.1726	8.54784	6.89895	9.50257	6.95725	9.91243	9.69596	8.06393	10.2335	7.78625	1.02233	1.22923	0.968625	1.27307	BYSL_C381	6.15978	15.7062	18.4994	61.2561	19.0933
sp|Q9Y4H2|IRS2_HUMAN	IRS2	IRS2_HUMAN Insulin receptor substrate 2	409	R.SHTLSGGC#GGR.G	85.4933	86.2619	67.8433	76.2138	78.6412	77.8259	73.9176	90.1451	73.45	65.1913	78.0958	89.4813	67.7638	54.9839	65.5171	79.8662	77.5603	79.1709	77.5895	62.755	1.02973	1.00878	1.02934	1.27267	IRS2_C409	13.0458	1.59271	12.0079	15.6631	10.8725
sp|Q9Y277-2|VDAC3_HUMAN	VDAC3	VDAC3_HUMAN Isoform 2 of Voltage-dependent anion-selective channel protein 3	230	R.FGIAAKYMLDC#R.T	452.2	451.829	663.141	713.306	482.937	463.558	387.393	511.382	451.85	419.93	2433.06	484.406	415.706	384.941	431.155	522.39	553.267	450.209	1112.47	410.601	0.944192	1.16033	0.469578	1.27226	VDAC3_C230	23.334	25.112	13.7738	102.846	5.72974
sp|P78527|PRKDC_HUMAN	PRKDC	PRKDC_HUMAN DNA-dependent protein kinase catalytic subunit	1229	K.EEGVSFLINTFEGGGC#GQPSGILAQPTLLYLR.G	124.495	119.02	112.195	131.262	108.674	121.761	99.2653	107.101	120.03	109.191	132.224	82.1282	102.739	81.7809	95.2645	118.57	120.566	108.799	107.848	93.2614	0.983444	1.08981	1.09942	1.27137	PRKDC_C1229	5.19733	9.40711	9.63798	23.2503	11.389
sp|Q12802-2|AKP13_HUMAN	AKAP13	AKP13_HUMAN Isoform 2 of A-kinase anchor protein 13	1399	R.ENWC#TIEPC#PDAASLLASK.Q	153.078	176.897	143.937	150.242	160.896	154.679	125.305	160.289	191.45	152.036	128.193	140.83	126.733	115.367	130.67	157.971	155.273	159.015	140.353	124.257	1.01738	0.993435	1.12552	1.27132	AKAP13_C1399	10.7716	3.44666	20.8099	8.49891	6.39502
sp|O96020|CCNE2_HUMAN	CCNE2	CCNE2_HUMAN G1/S-specific cyclin-E2	109	K.NLFINPSPLPDLSWGC#SK.E	104.393	112.633	93.6026	98.2092	88.1881	92.6229	90.9092	89.6316	98.95	93.5926	94.0144	82.1775	75.2061	82.409	86.826	103.543	93.0067	93.1636	89.9281	81.4804	1.11328	1.11141	1.1514	1.27077	CCNE2_C109	9.21692	5.39912	5.42241	7.46774	7.19847
sp|Q12805|FBLN3_HUMAN	EFEMP1	FBLN3_HUMAN EGF-containing fibulin-like extracellular matrix protein 1	350	R.EDEMC#WNYHGGFR.C	189.992	199.621	180.643	192.824	187.034	155.122	173.632	165.178	194.36	187.601	147.554	198.891	144.802	150.959	152.999	190.085	178.327	177.724	178.015	149.586	1.06594	1.06956	1.0678	1.27074	EFEMP1_C350	4.99237	11.3853	8.44841	15.1546	2.85262
sp|Q9Y473|ZN175_HUMAN	ZNF175	ZN175_HUMAN Zinc finger protein 175	198;199	K.C#C#LFTESLK.L	22.9878	20.5368	18.5146	18.2917	25.5001	17.6407	18.8032	17.923	14.407	15.6691	22.2548	21.0202	17.3079	15.1642	16.3884	20.6797	20.4775	17.0444	19.648	16.2868	1.00988	1.21329	1.05251	1.26972	ZNF175_C198;199	10.8321	21.3009	13.6473	17.8171	6.60346
sp|P47895|AL1A3_HUMAN	ALDH1A3	AL1A3_HUMAN Aldehyde dehydrogenase family 1 member A3	467	K.LASALESGTVWINC#YNALYAQAPFGGFK.M	197.925	203.59	189.561	211.716	206.118	208.094	188.984	158.667	194.72	181.882	311.334	155.696	159.598	146.107	160.32	197.025	208.642	180.79	216.304	155.342	0.944319	1.0898	0.910871	1.26833	ALDH1A3_C467	3.58206	1.36078	10.7157	38.526	5.15363
sp|Q5R372-3|RBG1L_HUMAN	RABGAP1L	RBG1L_HUMAN Isoform 3 of Rab GTPase-activating protein 1-like	248	R.ILYSFC#TAFK.R	339.208	274.42	250.035	306.155	308.06	295.078	279.408	185.145	251.4	231.601	354.637	239.45	240.2	213.801	227.477	287.888	303.098	238.651	275.229	227.159	0.949818	1.20631	1.04599	1.26734	RABGAP1L_C248	16.0086	2.31277	20.2838	25.0266	5.81184
sp|Q9ULU4-7|PKCB1_HUMAN	ZMYND8	PKCB1_HUMAN Isoform 7 of Protein kinase C-binding protein 1	158	K.ITVAEC#IETQSK.A	23.87	23.4989	25.986	16.4447	19.7412	24.4237	16.2628	15.5318	23.64	25.3162	20.3077	20.1133	19.6986	18.5507	19.6333	24.4516	20.2032	18.4782	21.9124	19.2942	1.21029	1.32327	1.11588	1.2673	ZMYND8_C158	5.48723	19.8459	24.2727	13.4599	3.34149
sp|Q12841|FSTL1_HUMAN	FSTL1	FSTL1_HUMAN Follistatin-related protein 1	257;262	R.CVCAC#GNWVC#TAMTCDGK.N	42.85	47.7771	38.2859	37.6561	45.3104	41.3395	37.0177	35.7058	39.7478	37.6683	33.3302	36.2626	31.2221	34.9884	35.5231	42.971	41.4353	37.4904	35.7537	33.9112	1.03706	1.14619	1.20186	1.26716	FSTL1_C257;262	11.0464	9.23863	5.50027	6.19057	6.91248
sp|Q15149-6|PLEC_HUMAN	PLEC	PLEC_HUMAN Isoform 6 of Plectin	3688	R.EALEAESAWC#YLYGTGSVAGVYLPGSR.Q	151.247	182.402	188.427	168.304	154.294	174.166	141.592	188.19	178.26	167.069	198.343	156.066	141.782	138.395	131.945	174.025	165.588	169.348	173.826	137.374	1.05095	1.02762	1.00115	1.2668	PLEC_C3688	11.4671	6.16633	14.4933	12.6181	3.63789
sp|Q9NS15|LTBP3_HUMAN	LTBP3	LTBP3_HUMAN Latent-transforming growth factor beta-binding protein 3	1106;1108	R.C#EC#RPPWVPGPSGR.D	106.438	116.669	93.9324	113.165	111.317	98.5967	81.2672	108.102	108.189	90.2122	81.5299	92.3425	87.351	74.9027	88.0703	105.68	107.693	99.186	88.0282	83.4413	0.981307	1.06547	1.20052	1.26652	LTBP3_C1106;1108	10.7752	7.36509	15.6456	6.50654	8.87256
sp|Q9NZN5|ARHGC_HUMAN	ARHGEF12	ARHGC_HUMAN Rho guanine nucleotide exchange factor 12	1325	R.TGTGDIATC#YSPR.T	17.22	16.8019	16.4885	16.095	15.2859	14.6	20.9875	12.4394	14.26	21.2721	14.9845	14.1027	15.8701	11.1866	12.8339	16.8368	15.327	15.8956	16.7864	13.2969	1.09851	1.05921	1.003	1.26622	ARHGEF12_C1325	2.17976	4.88249	28.3262	23.2905	17.8677
sp|Q9BZ95|NSD3_HUMAN	WHSC1L1	NSD3_HUMAN Histone-lysine N-methyltransferase NSD3	1226;1230	R.FMNHSC#NPNC#ETQK.W	254.535	264.656	261.799	242.177	261.296	235.421	233.04	254.094	254.46	238.899	201.141	202.653	206.47	202.372	207.999	260.33	246.298	247.198	214.231	205.614	1.05697	1.05312	1.21518	1.26611	WHSC1L1_C1226;1230	2.00428	5.44897	4.96055	9.97812	1.41512
sp|O95407|TNF6B_HUMAN	TNFRSF6B	TNF6B_HUMAN Tumor necrosis factor receptor superfamily member 6B	70;73	R.DSPTTC#GPC#PPR.H	45.0257	51.5664	46.4765	38.9396	48.2505	37.3411	46.9025	45.5092	44.4205	46.7919	30.9841	52.395	33.0954	35.5201	44.3853	47.6895	41.5104	45.6107	43.3904	37.6669	1.14886	1.04558	1.09908	1.26609	TNFRSF6B_C70;73	7.20277	14.193	2.72777	25.5895	15.7783
sp|Q16881|TRXR1_HUMAN	TXNRD1	TRXR1_HUMAN Thioredoxin reductase 1, cytoplasmic	214	R.WGLGGTC#VNVGC#IPK.K	252.093	234.191	201.3	248.145	286.344	280.577	225.785	259.956	254.05	193.436	194.478	216.159	174.04	201.291	168.152	229.195	271.689	246.597	201.358	181.161	0.843592	0.92943	1.13825	1.26514	TXNRD1_C214	11.2403	7.57933	7.40642	6.37122	9.75934
sp|P29279|CTGF_HUMAN	CTGF	CTGF_HUMAN Connective tissue growth factor	160;161	K.C#C#EEWVCDEPK.D	127.707	128.983	118.763	113.505	126.838	115.633	99.1923	112.365	122.92	112.28	89.3304	112.119	101.436	88.8431	106.571	125.151	118.659	111.493	104.576	98.95	1.05472	1.12251	1.19674	1.26479	CTGF_C160;161	4.44964	6.03642	10.6625	12.6258	9.21842
sp|Q14872|MTF1_HUMAN	MTF1	MTF1_HUMAN Metal regulatory transcription factor 1	632;636;638	K.QEEAC#QCQC#AC#R.D	21.5081	20.9084	23.2677	20.1649	20.6455	15.7854	15.9058	16.9849	18.1898	13.805	11.684	12.6765	12.85	19.4951	19.5997	21.8947	18.8653	17.0269	12.7218	17.3149	1.16058	1.28589	1.72104	1.2645	MTF1_C632;636;638	5.60089	14.1956	6.71054	8.34171	22.3338
sp|Q9Y239|NOD1_HUMAN	NOD1	NOD1_HUMAN Nucleotide-binding oligomerization domain-containing protein 1	593	K.DHFQFTNLFLC#GLLSK.A	11.795	10.2003	8.94333	7.56128	10.7983	9.74978	10.3115	6.2664	9.85	7.45274	18.5802	10.0997	7.27801	8.99469	8.19571	10.3129	9.36979	8.80931	12.0442	8.15614	1.10065	1.17068	0.85625	1.26443	NOD1_C593	13.858	17.6273	25.1358	48.2638	10.5323
sp|P01130|LDLR_HUMAN	LDLR	LDLR_HUMAN Low-density lipoprotein receptor	216;222	R.C#DGGPDC#K.D	243.571	258.551	214.827	177.961	164.57	186.544	216.922	205.077	193.479	208.864	222.723	222.007	209.353	172.817	184.893	238.983	176.358	205.159	217.865	189.021	1.3551	1.16487	1.09693	1.26432	LDLR_C216;222	9.29785	6.27967	5.71339	3.58162	9.84783
sp|O95352|ATG7_HUMAN	ATG7	ATG7_HUMAN Ubiquitin-like modifier-activating enzyme ATG7	550;553	K.LGC#YFC#NDVVAPGDSTR.D	254.272	166.085	162.975	172.628	161.16	179.002	140.178	162.452	175.063	173.487	209.557	148.071	163.655	148.982	148.754	194.444	170.93	159.231	177.038	153.797	1.13756	1.22114	1.09831	1.26429	ATG7_C550;553	26.6584	5.28955	11.0935	17.4519	5.55156
sp|P47974|TISD_HUMAN	ZFP36L2	TISD_HUMAN Zinc finger protein 36, C3H1 type-like 2	87	K.FPGAANGSSC#GSAAAGGPTSYGTLK.E	35.35	27.2883	15.8083	23.3176	29.4176	26.7996	25.1169	19.9778	26.72	23.5599	21.7537	24.5596	24.816	16.0648	21.1753	26.1488	26.5116	23.9382	23.2911	20.6854	0.986317	1.09235	1.1227	1.26412	ZFP36L2_C87	37.5564	11.5429	14.714	6.10598	21.2523
sp|Q9H9A7|RMI1_HUMAN	RMI1	RMI1_HUMAN RecQ-mediated genome instability protein 1	268	R.C#FTTGSSSNTIPTR.Q	13.44	21.4374	14.4857	15.647	12.1791	16.8898	13.2508	14.6099	15.42	18.3372	10.5569	14.6816	12.1806	12.2023	14.6673	16.4543	14.9053	14.4269	14.5252	13.0167	1.10392	1.14053	1.13281	1.26409	RMI1_C268	26.4185	16.379	7.59791	26.7981	10.9819
sp|Q9BZG8|DPH1_HUMAN	DPH1	DPH1_HUMAN Diphthamide biosynthesis protein 1	428;433	K.VQEGSARPPSAVAC#EDCSC#R.D	22.7832	20.6535	25.7709	22.3454	23.4079	20.507	28.4814	26.4768	22.737	27.7379	22.2514	19.9597	19.3419	18.3938	17.0134	23.0692	22.0868	25.8984	23.3163	18.2497	1.04448	0.890757	0.9894	1.26409	DPH1_C428;433	11.1434	6.64473	11.2575	17.1422	6.41611
sp|O60318|GANP_HUMAN	MCM3AP	GANP_HUMAN Germinal-center associated nuclear protein	1285	R.ALAPSAEC#PIAEENLAR.G	21.8633	22.3668	24.3485	19.4823	19.9569	24.6083	17.8053	24.062	21.41	22.5084	15.9442	17.7731	16.1354	20.2615	17.8606	22.8596	21.3492	21.0925	18.7419	18.0858	1.07075	1.08378	1.2197	1.26395	MCM3AP_C1285	5.74737	13.2673	14.8888	18.0754	11.4576
sp|O95425|SVIL_HUMAN	SVIL	SVIL_HUMAN Supervillin	1101	K.NPC#AMFAAGEIK.T	64.925	58.2706	56.746	63.4623	53.9701	57.7847	54.2054	56.4909	49.8	50.9097	54.9089	47.3456	44.0471	47.5262	50.8498	59.9805	58.4057	53.4988	51.0548	47.4744	1.02696	1.12116	1.17483	1.26343	SVIL_C1101	7.25123	8.17812	6.3571	7.41109	7.16525
sp|Q15048|LRC14_HUMAN	LRRC14	LRC14_HUMAN Leucine-rich repeat-containing protein 14	221	R.NTVALLQLLDAGC#LR.R	82.2033	80.6732	65.4752	81.3821	75.707	79.3154	60.2418	70.0506	74.83	70.1713	74.7304	62.8648	60.0562	55.6923	64.995	76.1172	78.8015	68.3741	69.2555	60.2478	0.965936	1.11325	1.09908	1.2634	LRRC14_C221	12.1496	3.64493	10.8772	8.64275	7.72534
sp|Q9NXV6|CARF_HUMAN	CDKN2AIP	CARF_HUMAN CDKN2A-interacting protein	24	R.C#DGETDK.H	62.1133	61.345	41.3282	44.122	51.5105	54.3993	35.7321	45.6152	44.96	52.8625	38.6192	46.0524	42.5309	44.5458	43.3705	54.9288	50.0106	42.1024	45.8447	43.4824	1.09834	1.30465	1.19815	1.26324	CDKN2AIP_C24	21.4545	10.5983	13.1265	15.5392	2.32763
sp|Q9NX47|MARH5_HUMAN	44260	MARH5_HUMAN E3 ubiquitin-protein ligase MARCH5	65	R.VAC#PQC#NAEYLIVFPK.L	73.3716	89.5746	81.3339	74.5092	79.5905	81.0266	58.6628	77.1572	73.44	74.8047	80.0152	71.3264	65.9696	63.8851	63.6109	81.4267	78.3754	69.7533	75.3821	64.4885	1.03893	1.16735	1.08019	1.26265	44260_C65	9.94993	4.36919	14.0249	5.80125	2.00031
sp|Q9H093|NUAK2_HUMAN	NUAK2	NUAK2_HUMAN NUAK family SNF1-like kinase 2	277	R.EPPKPSDAC#GLIR.W	300.486	291.436	279.8	258.318	260.562	261.127	235.38	249.769	250.47	265.283	253.712	254.033	222.636	243.512	224.417	290.574	260.002	245.206	257.676	230.188	1.11758	1.18502	1.12767	1.26233	NUAK2_C277	3.56882	0.571369	3.4734	2.55734	5.02748
sp|Q04721|NOTC2_HUMAN	NOTCH2	NOTC2_HUMAN Neurogenic locus notch homolog protein 2	1211	K.C#SCPPGTR.G	170.812	184.094	162.051	139.687	153.453	139.131	122.585	162.249	154.5	148.72	126.939	136.26	151.196	117.305	141.258	172.319	144.09	146.445	137.306	136.586	1.19591	1.17668	1.25499	1.26161	NOTCH2_C1211	6.44097	5.63039	14.356	7.95875	12.7549
sp|Q9Y3X0|CCDC9_HUMAN	CCDC9	CCDC9_HUMAN Coiled-coil domain-containing protein 9	233	R.C#GLEHER.Q	99.2716	100.001	96.2478	88.5828	100.475	99.689	85.6745	89.3166	94.48	107.643	67.3341	81.1675	75.3956	68.0817	90.8206	98.5069	96.249	89.8237	85.3815	78.0993	1.02346	1.09667	1.15373	1.2613	CCDC9_C233	2.02034	6.90994	4.92589	23.989	14.8632
sp|Q9BXY0|MAK16_HUMAN	MAK16	MAK16_HUMAN Protein MAK16 homolog	39	R.NEYSLTGLC#NR.S	20.02	21.9021	21.3884	23.11	14.8437	22.134	15.2548	22.8134	23.14	18.7647	17.8252	20.5197	17.6391	14.5947	17.982	21.1035	20.0292	20.4027	19.0366	16.7386	1.05364	1.03435	1.10858	1.26077	MAK16_C39	4.60999	22.5533	21.866	7.18438	11.1395
sp|Q12789|TF3C1_HUMAN	GTF3C1	TF3C1_HUMAN General transcription factor 3C polypeptide 1	1981	R.DCESVC#FIGR.P	7.02333	8.28181	11.0217	7.34274	10.9709	10.1068	6.99582	9.40543	8.8	7.90337	8.36878	5.01292	5.92602	7.72501	7.24865	8.77561	9.47348	8.40041	7.09502	6.96656	0.926334	1.04466	1.23687	1.25968	GTF3C1_C1981	23.2966	20.0052	14.9221	25.6251	13.3794
sp|Q14296|FASTK_HUMAN	FASTK	FASTK_HUMAN Fas-activated serine/threonine kinase	61;62	R.LSGLLLIPPVQPC#C#LGPSK.W	32.3275	34.7955	32.6595	30.6328	30.2709	31.2874	30.3596	30.6625	28.0448	34.5137	34.2621	35.0198	25.9679	29.294	23.988	33.2608	30.7304	29.689	34.5985	26.4167	1.08234	1.12031	0.961337	1.25909	FASTK_C61;62	4.0269	1.67673	4.82326	1.11538	10.1501
sp|Q9BRZ2|TRI56_HUMAN	TRIM56	TRI56_HUMAN E3 ubiquitin-protein ligase TRIM56	101;104	K.PAC#ALC#PLVGGTSTGGPATAR.C	60.3019	57.8234	64.7354	60.0381	61.1095	59.6378	38.6859	51.9323	51.2325	52.0328	50.221	42.6781	51.978	50.3997	42.8588	60.9536	60.2618	47.2835	48.3106	48.4121	1.01148	1.28911	1.2617	1.25906	TRIM56_C101;104	5.74496	1.26277	15.7645	10.2696	10.0671
sp|Q13206|DDX10_HUMAN	DDX10	DDX10_HUMAN Probable ATP-dependent RNA helicase DDX10	323	K.SIVFFSSC#K.E	160.043	148.739	154.808	168.501	156.829	158.151	154.552	118.875	145.05	138.17	174.49	133.698	138.522	113.189	116.841	154.53	161.16	139.492	148.786	122.851	0.958859	1.1078	1.0386	1.25787	DDX10_C323	3.66095	3.96579	13.2455	15.0365	11.1472
sp|Q5TGY3|AHDC1_HUMAN	AHDC1	AHDC1_HUMAN AT-hook DNA-binding motif-containing protein 1	791	R.NC#GFQGTEAR.A	136.687	170.498	145.612	130.487	134.542	139.082	101.403	144.302	160.12	148.003	90.0603	102.168	118.066	109.995	131.921	150.932	134.704	135.275	113.41	119.994	1.12048	1.11574	1.33085	1.25784	AHDC1_C791	11.6093	3.19216	22.4591	26.9498	9.24172
sp|P48449|ERG7_HUMAN	LSS	ERG7_HUMAN Lanosterol synthase	700	K.SC#AISYTSYR.N	13.405	17.3024	10.0266	20.0505	15.383	16.225	9.42492	8.37853	16.68	18.1986	12.566	16.098	11.7383	12.1622	8.48712	13.578	17.2195	11.4945	15.6208	10.7959	0.788524	1.18126	0.869224	1.2577	LSS_C700	26.8154	14.4463	39.3333	18.2221	18.6243
sp|P04150-3|GCR_HUMAN	NR3C1	GCR_HUMAN Isoform Alpha-2 of Glucocorticoid receptor	639;644	R.MTLPC#MYDQC#K.H	724.321	767.354	663.43	697.671	751.944	737.353	667.107	726.099	731.59	666.727	674.39	672.54	578.443	576.362	558.736	718.369	728.989	708.265	671.219	571.181	0.985431	1.01426	1.07025	1.25769	NR3C1_C639;644	7.26884	3.85277	5.04748	0.595724	1.89559
sp|Q9H967|WDR76_HUMAN	WDR76	WDR76_HUMAN WD repeat-containing protein 76	81	K.NSNNEVAC#K.K	64.5983	73.6664	60.4367	56.2179	65.0812	75.2407	46.4445	53.3285	62.54	64.7175	39.5406	42.7761	55.5959	51.4956	50.9106	66.2338	65.5133	54.1043	49.0114	52.6674	1.011	1.22419	1.3514	1.25759	WDR76_C81	10.2135	14.5295	14.9263	27.9481	4.84743
sp|Q6NYC8|PPR18_HUMAN	PPP1R18	PPR18_HUMAN Phostensin	396	R.ALQNC#C#SVPSPLPPEDAGTGGLR.Q	23.5433	20.8654	25.5326	19.2966	21.0896	22.4787	18.8134	22.8718	23.37	20.0473	17.147	20.7784	16.7925	18.3502	20.4832	23.3138	20.955	21.6851	19.3242	18.542	1.11257	1.07511	1.20645	1.25735	PPP1R18_C396	10.0457	7.61308	11.5258	9.93892	9.99254
sp|Q14493|SLBP_HUMAN	SLBP	SLBP_HUMAN Histone RNA hairpin-binding protein	15	R.C#DGDASPPSPAR.W	24.1617	28.3011	18.5794	18.7611	21.5859	21.7154	16.3114	19.8261	22.5	24.3225	21.4082	19.4851	21.1517	12.9641	22.4138	23.6807	20.6875	19.5458	21.7386	18.8432	1.14469	1.21155	1.08934	1.25673	SLBP_C15	20.6018	8.07013	15.8795	11.2039	27.2267
sp|P49023-3|PAXI_HUMAN	PXN	PAXI_HUMAN Isoform Gamma of Paxillin	323	R.SPDQPPPC#PQFMAQGK.T	125.732	118.066	109.512	113.332	112.838	108.528	102.994	117.498	109.86	103.876	103.765	102.82	104.293	75.3122	101.688	117.77	111.566	110.117	103.487	93.7642	1.05561	1.0695	1.13801	1.25602	PXN_C323	6.88973	2.36856	6.58875	0.56065	17.0992
sp|Q8IY17-4|PLPL6_HUMAN	PNPLA6	PLPL6_HUMAN Isoform 4 of Neuropathy target esterase	1208	R.LAYVSC#VR.Q	1376.79	1247.85	1393.62	1266.23	1261.73	1258.98	1447.95	1270.27	1250.37	1088.17	1270.94	1115.22	1023.33	1109.01	1067.3	1339.42	1262.31	1322.86	1158.11	1066.55	1.06108	1.01252	1.15656	1.25585	PNPLA6_C1208	5.95405	0.290045	8.22348	8.5178	4.01698
sp|Q13200|PSMD2_HUMAN	PSMD2	PSMD2_HUMAN 26S proteasome non-ATPase regulatory subunit 2	230;236	K.VC#LYLTSC#VNYVPEPENSALLR.C	105.983	105.787	103.038	116.519	110.874	114.812	87.783	112.011	111.909	96.5458	117.605	88.927	100.411	67.426	82.8377	104.936	114.068	103.901	101.026	83.5583	0.919943	1.00996	1.03871	1.25585	PSMD2_C230;236	1.56907	2.53803	13.4346	14.7038	19.7519
sp|Q86U28|ISCA2_HUMAN	ISCA2	ISCA2_HUMAN Iron-sulfur cluster assembly 2 homolog, mitochondrial	79	R.LQVEGGGC#SGFQYK.F	40.3666	48.0464	38.2926	41.7728	43.7651	45.9298	37.3596	40.1656	35.7	41.6314	37.2372	32.8981	31.9803	35.6179	33.3049	42.2352	43.8226	37.7417	37.2556	33.6344	0.963778	1.11906	1.13366	1.25571	ISCA2_C79	12.1661	4.74439	5.98064	11.7209	5.47374
sp|O95633-2|FSTL3_HUMAN	FSTL3	FSTL3_HUMAN Isoform 2 of Follistatin-related protein 3	73;78	K.DSC#DGVEC#GPGK.A	132.815	126.313	111.378	128.295	121.266	126.555	111.832	124.79	116.641	109.649	79.3631	111.629	104.233	84.4879	106.479	123.502	125.372	117.754	100.214	98.4002	0.985086	1.04881	1.23239	1.2551	FSTL3_C73;78	8.8996	2.92004	5.56259	18.0456	12.2973
sp|Q8N442|GUF1_HUMAN	GUF1	GUF1_HUMAN Translation factor GUF1, mitochondrial	129	K.AQTASLFYNC#EGK.Q	66.43	79.7914	76.1316	71.2858	70.7771	67.8668	65.9016	71.0892	70.73	71.3383	58.9397	56.731	53.6248	55.2378	68.334	74.1177	69.9766	69.2402	62.3364	59.0656	1.05918	1.07044	1.189	1.25484	GUF1_C129	9.31577	2.63618	4.18391	12.6311	13.658
sp|Q9Y5Q8-3|TF3C5_HUMAN	GTF3C5	TF3C5_HUMAN Isoform 3 of General transcription factor 3C polypeptide 5	26	R.MVC#VEYPGVVR.D	39.4683	42.4338	41.4542	37.8938	35.9009	38.1128	35.9264	40.0606	32.57	39.5862	39.3486	39.894	29.0994	34.2146	34.9927	41.1188	37.3025	36.1857	39.6096	32.7689	1.10231	1.13633	1.0381	1.25481	GTF3C5_C26	3.67461	3.26713	10.3688	0.690362	9.7702
sp|Q92625|ANS1A_HUMAN	ANKS1A	ANS1A_HUMAN Ankyrin repeat and SAM domain-containing protein 1A	866	R.C#QDLLSQTSSPLSQNDSC#TGR.S	21.56	26.9665	17.6221	15.0679	22.2223	22.5771	14.186	16.302	24.07	19.354	15.3811	12.637	17.1336	18.4037	17.1806	22.0495	19.9558	18.186	15.7907	17.5727	1.10492	1.21245	1.39636	1.25476	ANKS1A_C866	21.2766	21.2306	28.6176	21.3872	4.09776
sp|Q12888-2|TP53B_HUMAN	TP53BP1	TP53B_HUMAN Isoform 2 of Tumor suppressor p53-binding protein 1	324	K.TVSSDGC#STPSR.E	85.7033	74.286	55.4234	57.3761	68.6195	72.4463	65.0635	57.5295	69.79	76.4802	66.0033	62.8032	65.5653	48.7023	57.5157	71.8042	66.1473	64.1277	68.4289	57.2611	1.08552	1.11971	1.04933	1.25398	TP53BP1_C324	21.2964	11.8423	9.64265	10.4544	14.7296
sp|Q8WTP8-2|AEN_HUMAN	AEN	AEN_HUMAN Isoform 2 of Apoptosis-enhancing nuclease	12;14	R.EAPESAQC#LC#PSLTIPNAK.D	162.937	191.723	172.426	159.011	166.626	154.252	145.721	145.282	180.167	177.594	152.639	152.632	157.277	119.705	143.475	175.695	159.963	157.057	160.955	140.152	1.09835	1.11868	1.09158	1.2536	AEN_C12;14	8.3491	3.90187	12.7439	8.95277	13.5603
sp|O94832|MYO1D_HUMAN	MYO1D	MYO1D_HUMAN Unconventional myosin-Id	353	R.LFC#WIVTR.I	129.173	108.915	119.967	120.379	111.241	98.3964	120.398	93.9259	95.42	97.5443	158.444	108.363	103.333	96.4691	85.9639	119.352	110.006	103.248	121.45	95.2552	1.08496	1.15597	0.982719	1.25297	MYO1D_C353	8.49864	10.039	14.4036	26.7523	9.18347
sp|O15417|TNC18_HUMAN	TNRC18	TNC18_HUMAN Trinucleotide repeat-containing gene 18 protein	2595	K.NGDGGC#GTGGR.N	69.58	79.6484	67.5662	73.788	65.9119	68.3469	51.9707	69.082	69.62	68.9119	52.7207	52.5433	64.3144	49.5443	59.2155	72.2648	69.3489	63.5576	58.0586	57.6914	1.04205	1.137	1.24469	1.25261	TNRC18_C2595	8.95748	5.81487	15.7938	16.1898	13.0038
sp|Q6NTE8|CE045_HUMAN	C5orf45	CE045_HUMAN UPF0544 protein C5orf45	126	K.DSQELELEGTGVC#FSK.Q	9.39166	13.3224	12.8734	10.9049	9.50382	13.0366	11.8419	9.93054	17.12	11.8897	12.2205	14.5954	12.4206	10.6653	5.33025	11.8625	11.1484	12.9641	12.9019	9.47207	1.06405	0.915022	0.919439	1.25236	C5orf45_C126	18.1373	15.957	28.7238	11.4396	38.9855
sp|O00622|CYR61_HUMAN	CYR61	CYR61_HUMAN Protein CYR61	322;323	R.C#C#TPQLTR.T	116.691	119.509	101.745	104.828	120.115	108.476	101.348	106.055	118.101	110.556	84.5044	105.391	104.213	78.4572	87.2653	112.648	111.14	108.501	100.151	89.9784	1.01357	1.03822	1.12479	1.25195	CYR61_C322;323	8.47497	7.18371	7.9635	13.7731	14.5484
tr|E9PF99|E9PF99_HUMAN	CEP192	E9PF99_HUMAN Centrosomal protein of 192 kDa	2168;2182	R.FELC#WPAHCLTVTPQHGC#VAPESK.L	36.2051	39.6492	36.1387	32.9064	28.8777	29.8899	38.0158	32.7983	29.329	34.7512	37.7129	32.3494	27.2147	29.4772	32.7921	37.331	30.558	33.381	34.9379	29.828	1.22165	1.11833	1.0685	1.25154	CEP192_C2168;2182	5.37867	6.85848	13.0991	7.6896	9.40464
sp|Q8IZT6|ASPM_HUMAN	ASPM	ASPM_HUMAN Abnormal spindle-like microcephaly-associated protein	2987	K.IIQGC#FYTK.L	210.268	225.635	197.295	234.367	200.627	221.586	212.425	181.912	198.5	187.798	198.035	197.561	172.613	173.88	159.507	211.066	218.86	197.612	194.465	168.666	0.964389	1.06808	1.08537	1.25138	ASPM_C2987	6.72147	7.78328	7.73018	2.97162	4.718
sp|Q8WV99|ZFN2B_HUMAN	ZFAND2B	ZFN2B_HUMAN AN1-type zinc finger protein 2B	171	R.AQAVASTSTVPSPSQTMPSC#TSPSR.A	26.3083	32.3527	36.3149	28.4531	21.4025	31.7237	24.0724	29.1615	28.66	31.7059	25.2215	25.4464	27.6716	25.9951	22.2316	31.6586	27.1931	27.298	27.458	25.2994	1.16422	1.15974	1.15299	1.25136	ZFAND2B_C171	15.9176	19.3973	10.2742	13.4044	11.0117
sp|Q9NWS6|F118A_HUMAN	FAM118A	F118A_HUMAN Protein FAM118A	234	K.SFLFVGC#GETLR.D	77.4199	82.1508	82.8076	69.5048	74.1643	83.2547	75.8487	75.6985	76.55	79.935	99.0433	71.7328	65.5779	65.3151	62.8217	80.7928	75.6413	76.0324	83.5704	64.5716	1.0681	1.06261	0.966763	1.25121	FAM118A_C234	3.63816	9.24489	0.597752	16.7685	2.35575
sp|Q9ULL5-3|PRR12_HUMAN	PRR12	PRR12_HUMAN Isoform 3 of Proline-rich protein 12	417	K.C#QSLGGPAAAYATGK.A	55.7083	57.0074	62.175	60.8836	63.7112	64.6415	52.8087	51.2164	49.96	47.6975	48.4724	59.1574	45.5381	42.8885	51.3598	58.2969	63.0788	51.3284	51.7758	46.5955	0.924192	1.13576	1.12595	1.25113	PRR12_C417	5.86783	3.10273	2.7814	12.3695	9.30025
sp|Q2T9J0|TYSD1_HUMAN	TYSND1	TYSD1_HUMAN Peroxisomal leader peptide-processing protease	284	R.PAGALVALVVAPLC#WK.A	19.6817	13.5965	18.2393	23.8202	17.7455	11.1901	15.9349	17.2472	16.82	21.1912	45.4141	20.1995	12.8123	15.8109	12.5668	17.1725	17.5853	16.6674	28.9349	13.73	0.976527	1.03031	0.593487	1.25073	TYSND1_C284	18.5167	35.9198	4.0157	49.352	13.1557
sp|P46779-3|RL28_HUMAN	RPL28	RL28_HUMAN Isoform 3 of 60S ribosomal protein L28	13	R.NC#SSFLIKR.N	288.61	292.699	440.956	418.416	299.613	304.878	272.934	305.326	311.03	288.982	772.947	278.938	241.488	260.285	315.832	340.755	340.969	296.43	446.956	272.535	0.999373	1.14953	0.762392	1.25032	RPL28_C13	25.4731	19.6859	6.93151	63.1745	14.184
sp|Q53EP0|FND3B_HUMAN	FNDC3B	FND3B_HUMAN Fibronectin type III domain-containing protein 3B	774;782	K.APC#ISCTPDGC#VLVGWESPDSSGADISEYR.L	12.9071	18.3228	14.0501	6.47459	13.2055	16.1234	13.5909	13.1891	16.9685	10.1124	16.1542	19.2609	11.3093	11.2464	13.6787	15.0933	11.9345	14.5829	15.1758	12.0781	1.26468	1.03501	0.994565	1.24964	FNDC3B_C774;782	18.9128	41.4629	14.2346	30.6543	11.4793
sp|Q9HD67|MYO10_HUMAN	MYO10	MYO10_HUMAN Unconventional myosin-X	1517	K.ENC#LNSDVVEQIYK.R	12.3317	26.609	14.8762	10.7191	17.6161	17.8746	18.6677	11.821	14.95	16.5116	15.8034	17.8224	12.0542	16.2519	14.7644	17.9389	15.4032	15.1462	16.7125	14.3569	1.16462	1.18439	1.07339	1.2495	MYO10_C1517	42.4525	26.3493	22.6298	6.12924	14.8245
sp|Q9HD67|MYO10_HUMAN	MYO10	MYO10_HUMAN Unconventional myosin-X	230	K.FVQLNIC#QK.G	95.9699	98.7263	77.0638	75.427	85.0274	91.7858	76.8447	80.658	86.06	77.1041	77.2384	71.9915	74.2205	70.7681	72.5594	90.5867	84.0801	81.1875	75.4447	72.516	1.07739	1.11577	1.2007	1.2492	MYO10_C230	13.0174	9.77689	5.70338	3.96489	2.38106
sp|Q01954|BNC1_HUMAN	BNC1	BNC1_HUMAN Zinc finger protein basonuclin-1	211	R.AFIESC#SHR.S	16.1117	14.0255	25.0665	16.2699	20.0972	15.9788	12.9957	18.6008	20.62	19.5967	20.3845	16.7878	12.3069	17.9092	13.9874	18.4012	17.4486	17.4055	18.923	14.7345	1.05459	1.05721	0.972427	1.24885	BNC1_C211	31.8773	13.1721	22.6951	9.99128	19.5114
sp|O00468|AGRIN_HUMAN	AGRN	AGRIN_HUMAN Agrin	891;901	R.ALGPAGC#EADASAPATC#AEMR.C	17.4236	22.2616	15.8829	14.2352	17.6548	12.8527	13.9748	20.2515	16.7669	16.3915	16.9145	16.1932	13.3476	16.2266	14.9432	18.5227	14.9142	16.9977	16.4997	14.8391	1.24195	1.08972	1.12261	1.24824	AGRN_C891;901	17.9691	16.5748	18.5007	2.25816	9.71986
sp|P07858|CATB_HUMAN	CTSB	CATB_HUMAN Cathepsin B	93	R.EQWPQC#PTIK.E	80.9199	84.7366	80.2632	72.1709	69.8925	66.4388	78.5086	84.6605	81.63	68.8079	67.4493	65.8454	65.4895	64.0187	67.5448	81.9733	69.5007	81.5997	67.3675	65.6843	1.17946	1.00458	1.21681	1.24799	CTSB_C93	2.94677	4.15253	3.7697	2.20123	2.69641
sp|P04733|MT1F_HUMAN	MT1F	MT1F_HUMAN Metallothionein-1F	37;41	K.SCCSCC#PVGC#SK.C	52.1056	47.8555	53.1546	53.2192	45.8576	54.8256	44.9722	42.5378	56.2772	50.9223	51.6138	53.9172	42.9447	36.4222	43.3283	51.0386	51.3008	47.9291	52.1511	40.8984	0.994888	1.06488	0.978667	1.24794	MT1F_C37;41	5.49789	9.32121	15.2965	3.00682	9.48997
sp|Q68CP9|ARID2_HUMAN	ARID2	ARID2_HUMAN AT-rich interactive domain-containing protein 2	1362	R.KPLVNGIC#DFDK.G	23.8	30.1482	22.4087	19.1764	15.8469	22.294	24.2546	24.2254	20.83	19.874	21.9201	24.2148	23.4893	17.4949	20.204	25.4523	19.1058	23.1033	22.0029	20.396	1.33218	1.10167	1.15677	1.2479	ARID2_C1362	16.21	16.8752	8.52178	9.86949	14.7176
sp|P55196-5|AFAD_HUMAN	MLLT4	AFAD_HUMAN Isoform 5 of Afadin	1752;1774	K.FVAYNEEEEEEDC#SLAGPNSYPGSTGAAVGAHDAC#R.D	28.6167	22.1652	26.0498	28.7342	21.6933	23.3017	22.1992	29.1861	25.8321	24.7186	22.444	20.424	19.5556	21.8206	20.215	25.6106	24.5764	25.7391	22.5289	20.5304	1.04208	0.995005	1.13679	1.24745	MLLT4_C1752;1774	12.6827	15.0122	13.576	9.53704	5.67439
sp|Q8IVF2|AHNK2_HUMAN	AHNAK2	AHNK2_HUMAN Protein AHNAK2	4904;4917	R.VQC#PLPSTQLPSPGTC#VSQGPEELVASLQTSVVAPGEAPSEDADHEGK.G	16.3609	14.513	16.1966	20.0524	16.9582	13.9196	8.60724	15.3194	19.4946	14.9895	13.7967	14.0325	15.4545	10.4764	11.8184	15.6902	16.9767	14.4738	14.2729	12.5831	0.924216	1.08404	1.0993	1.24692	AHNAK2_C4904;4917	6.51825	18.0628	37.9495	4.42608	20.4692
sp|Q86X10|RLGPB_HUMAN	RALGAPB	RLGPB_HUMAN Ral GTPase-activating protein subunit beta	344	R.GISC#LVDAFLGISR.P	49.3733	48.7137	47.1729	51.279	47.4112	41.8305	44.5012	45.4635	45.87	46.2648	60.5009	44.9808	33.9388	38.4914	44.0869	48.42	46.8402	45.2782	50.5822	38.839	1.03373	1.06939	0.957254	1.24668	RALGAPB_C344	2.33216	10.141	1.55255	17.0294	13.0873
sp|Q9BTC0|DIDO1_HUMAN	DIDO1	DIDO1_HUMAN Death-inducer obliterator 1	1685	R.DPFTC#PGFASQDK.A	189.455	196.392	144.126	172.576	169.44	149.46	161.438	136.25	151	187.37	152.148	182.202	135.3	161.651	128.169	176.658	163.825	149.563	173.907	141.707	1.07833	1.18116	1.01582	1.24664	DIDO1_C1685	16.0683	7.65417	8.46151	10.9369	12.4456
sp|Q00653|NFKB2_HUMAN	NFKB2	NFKB2_HUMAN Nuclear factor NF-kappa-B p100 subunit	120	K.QC#SELGIC#AVSVGPK.D	19.0983	19.2448	19.8517	26.4535	18.3388	17.8623	18.8741	17.0721	16.93	21.7112	18.8745	18.352	20.0145	11.6142	15.0558	19.3983	20.8849	17.6254	19.6459	15.5615	0.928818	1.10058	0.987395	1.24655	NFKB2_C120	2.05912	23.1195	6.14877	9.20071	27.1369
sp|Q9Y625|GPC6_HUMAN	GPC6	GPC6_HUMAN Glypican-6	60;66;67	R.IC#PQEYTC#C#TTEMEDK.L	131.181	124.486	104.711	89.7201	94.3639	95.7619	93.2524	85.9243	106.364	107.851	101.526	93.7457	97.2007	97.5931	94.3593	120.126	93.282	95.1801	101.041	96.3844	1.28777	1.26209	1.18889	1.24632	GPC6_C60;66;67	11.4574	3.39067	10.8795	6.99248	1.8309
sp|Q12805|FBLN3_HUMAN	EFEMP1	FBLN3_HUMAN EGF-containing fibulin-like extracellular matrix protein 1	332;344	R.TC#QDINECETTNEC#R.E	49.9433	62.3666	59.1196	51.6423	54.0218	48.1097	45.656	46.4627	58.5591	53.7781	38.145	46.597	46.0944	40.7044	50.7733	57.1432	51.2579	50.226	46.1734	45.8574	1.11482	1.13772	1.23758	1.24611	EFEMP1_C332;344	11.2755	5.8035	14.3909	16.9473	10.9877
sp|Q92466|DDB2_HUMAN	DDB2	DDB2_HUMAN DNA damage-binding protein 2	48;52	R.C#DSDC#LWVGLAGPQILPPCR.S	208.011	223.929	221.873	217.372	213.794	253.958	166.347	219.513	253.499	220.285	177.872	175.319	179.315	163.774	181.613	217.938	228.375	213.12	191.158	174.901	0.954298	1.02261	1.14009	1.24606	DDB2_C48;52	3.97272	9.73307	20.6109	13.2123	5.54846
sp|Q9UGK8|SRGEF_HUMAN	SERGEF	SRGEF_HUMAN Secretion-regulating guanine nucleotide exchange factor	189	R.LC#PGQTLPLFFTAK.E	55.6266	51.4068	50.4353	50.6671	50.4749	39.6023	42.6793	49.4193	55.93	44.4969	46.5145	42.4559	41.2168	42.3138	42.9455	52.4896	46.9148	49.3429	44.4891	42.1587	1.11883	1.06377	1.17983	1.24505	SERGEF_C189	5.25789	13.5	13.4278	4.56142	2.0749
sp|A6QL64|AN36A_HUMAN	ANKRD36	AN36A_HUMAN Ankyrin repeat domain-containing protein 36A	342	K.SGTVLPAVEQC#LNR.S	26.04	19.924	19.7887	21.2306	15.3075	21.6169	19.3235	18.064	20.22	20.6944	20.9091	16.7508	16.9694	17.7889	18.067	21.9176	19.385	19.2025	19.4514	17.6084	1.13064	1.14139	1.12678	1.24472	ANKRD36_C342	16.2918	18.2434	5.64025	12.0366	3.24064
sp|Q5VYS8|TUT7_HUMAN	ZCCHC6	TUT7_HUMAN Terminal uridylyltransferase 7	690	K.NSVLAQGPGATSSAANTC#K.V	49.7466	48.0345	45.7747	45.9686	45.7392	38.5067	38.9507	42.7562	44.46	39.0547	38.0178	46.2248	39.3215	39.5473	36.474	47.8519	43.4048	42.0556	41.0991	38.4476	1.10246	1.13783	1.16431	1.2446	ZCCHC6_C690	4.16335	9.77648	6.70704	10.8742	4.4552
tr|G3V1V0|G3V1V0_HUMAN	MYL6	G3V1V0_HUMAN Myosin light polypeptide 6	138	K.MTEEEVEMLVAGHEDSNGC#INYEGKRR.C	216.37	268.664	259.268	239.634	229.516	253.703	165.325	218.682	283.25	215.841	207.262	175.736	196.633	176.245	225.194	248.101	240.951	222.419	199.613	199.357	1.02967	1.11547	1.24291	1.2445	MYL6_C138	11.2368	5.04152	26.5496	10.5797	12.3335
sp|Q7Z333-4|SETX_HUMAN	SETX	SETX_HUMAN Isoform 4 of Probable helicase senataxin	1110;1123	K.C#LAPIANTTNGQGC#TDYVSEVVK.K	148.21	148.847	148.872	156.427	129.511	156.922	134.737	146.339	147.524	137.382	134.259	128.93	121.475	122.621	114.302	148.643	147.62	142.867	133.524	119.466	1.00693	1.04043	1.11323	1.24423	SETX_C1110;1123	0.252385	10.6249	4.94514	3.20074	3.77417
sp|O00339|MATN2_HUMAN	MATN2	MATN2_HUMAN Matrilin-2	918	K.C#ENLIMFQNLANEEVR.K	165.025	167.054	170.024	176.597	187.099	162.447	121.358	167.851	164.18	166.017	266.432	144.796	146.811	124.482	132.309	167.368	175.381	151.13	192.415	134.534	0.954308	1.10745	0.869827	1.24405	MATN2_C918	1.50222	7.05375	17.1033	33.767	8.42126
sp|Q9NS15|LTBP3_HUMAN	LTBP3	LTBP3_HUMAN Latent-transforming growth factor beta-binding protein 3	428;429;430	K.QLC#C#C#SVGK.A	162.217	158.344	144.365	154.877	165.497	138.129	126.543	158.041	161.012	117.641	118.837	122.752	134.63	117.101	122.001	154.975	152.834	148.532	119.744	124.577	1.01401	1.04338	1.29423	1.24401	LTBP3_C428;429;430	6.0593	9.02791	12.8596	2.23265	7.25997
sp|O15516|CLOCK_HUMAN	CLOCK	CLOCK_HUMAN Circadian locomoter output cycles protein kaput	250	R.VC#FVATVR.L	11.725	11.8448	15.0147	8.30429	10.8523	12.6427	10.2265	10.4207	14.42	11.104	11.875	12.0212	11.2076	8.3799	11.4376	12.8615	10.5998	11.6891	11.6667	10.3417	1.21338	1.1003	1.10241	1.24365	CLOCK_C250	14.5061	20.5684	20.2502	4.2237	16.4659
sp|Q9NYL2|MLTK_HUMAN	MLTK	MLTK_HUMAN Mitogen-activated protein kinase kinase kinase MLT	571	R.SDSSADC#QWLDTLR.M	24.045	37.715	23.5046	26.4754	24.6927	24.1898	21.364	25.1123	25.64	29.5799	22.7006	23.057	24.6265	17.1608	26.7727	28.4215	25.1193	24.0387	25.1125	22.8533	1.13146	1.18232	1.13177	1.24365	MLTK_C571	28.3339	4.78136	9.69854	15.4225	22.077
sp|Q9BW92|SYTM_HUMAN	TARS2	SYTM_HUMAN Threonine--tRNA ligase, mitochondrial	233;240	K.VTGPTATVYGC#GTLVDLC#QGPHLR.H	114.444	123.527	113.549	120.702	118.837	129.257	105.925	119.518	136.763	108.604	116.87	97.0421	96.2144	91.2865	95.2004	117.173	122.932	120.735	107.505	94.2338	0.953156	0.9705	1.08993	1.24343	TARS2_C233;240	4.71103	4.51955	12.8008	9.26404	2.76151
sp|Q9NS91|RAD18_HUMAN	RAD18	RAD18_HUMAN E3 ubiquitin-protein ligase RAD18	204;207	K.VDC#PVC#GVNIPESHINK.H	41.0669	46.6039	41.7424	39.5778	39.8094	40.5344	41.5479	37.0708	41.1721	42.6525	39.4784	38.6079	31.0244	38.3346	34.7191	43.1377	39.9739	39.9303	40.2463	34.6927	1.07915	1.08033	1.07184	1.24342	RAD18_C204;207	7.00256	1.24852	6.21959	5.28953	10.5358
sp|Q9H3H3-3|CK068_HUMAN	C11orf68	CK068_HUMAN Isoform 3 of UPF0696 protein C11orf68	241	K.C#LLTYKPDVYTYLGIYR.A	272.451	237.289	240.336	299.293	245.708	265.226	267.979	163.848	198.6	217.042	532.3	227.983	217.746	185.227	200.34	250.025	270.076	210.142	325.775	201.104	0.925761	1.18979	0.767478	1.24326	C11orf68_C241	7.79168	10.0416	25.2287	54.9273	8.09203
sp|Q8IZV5|RDH10_HUMAN	RDH10	RDH10_HUMAN Retinol dehydrogenase 10	320	K.C#MYPFIAQR.K	384.93	416.164	487.537	503.721	421.599	386.273	328.767	395.215	404.76	390.038	1705.58	396.144	339.994	329.623	367.01	429.544	437.198	376.247	830.587	345.542	0.982493	1.14165	0.517156	1.2431	RDH10_C320	12.2446	13.7827	11.0021	91.2332	5.58579
sp|Q9NRG9|AAAS_HUMAN	AAAS	AAAS_HUMAN Aladin	321	R.VWEAQMWTC#ER.W	29.085	25.763	23.7691	28.8356	24.8653	17.1975	25.9793	25.1473	20.52	23.6292	17.339	17.8593	20.3557	20.5822	22.3288	26.2057	23.6328	23.8822	19.6092	21.0889	1.10887	1.09729	1.3364	1.24263	AAAS_C321	10.2476	25.0335	12.3159	17.8038	5.11986
sp|P62979|RS27A_HUMAN	RPS27A	RS27A_HUMAN Ubiquitin-40S ribosomal protein S27a	144;145;149	K.C#C#LTYC#FNKPEDK.-	310.842	291.423	283.176	313.484	226.597	253.591	268.424	179.37	241.93	231.632	240.104	219.972	279.073	186.491	246.994	295.147	264.557	229.908	230.569	237.52	1.11563	1.28376	1.28008	1.24262	RPS27A_C144;145;149	4.81253	16.8091	19.8896	4.38395	19.7931
sp|Q9UKT4|FBX5_HUMAN	FBXO5	FBX5_HUMAN F-box only protein 5	95	R.LSC#IGSPIVSPR.I	43.2483	41.135	37.3604	37.8064	46.3972	41.0303	31.1532	41.846	35.47	37.3793	37.9282	37.2828	29.0236	32.7444	36.2433	40.5812	41.7446	36.1564	37.5301	32.6704	0.97213	1.12238	1.0813	1.24214	FBXO5_C95	7.35005	10.3959	14.8779	0.927596	11.051
sp|P35611-3|ADDA_HUMAN	ADD1	ADDA_HUMAN Isoform 3 of Alpha-adducin	556	K.TAGPQSQVLC#GVVM*DR.S	40.5766	44.5073	40.3709	36.069	32.5352	34.7397	38.1612	34.3893	36.81	35.8194	38.4401	33.1321	33.307	35.9921	31.7022	41.8183	34.448	36.4535	35.7972	33.6671	1.21395	1.14717	1.1682	1.24211	ADD1_C556	5.57414	5.18139	5.24242	7.41415	6.43806
sp|Q5ST30-4|SYVM_HUMAN	VARS2	SYVM_HUMAN Isoform 4 of Valine--tRNA ligase, mitochondrial	495	R.GLQNHPMVLPIC#SR.S	19.2617	24.1662	17.471	24.301	26.0195	16.8036	14.7811	18.6592	22.72	20.0473	16.3665	17.2188	21.4802	16.2519	11.3283	20.2996	22.3747	18.7201	17.8775	16.3535	0.907257	1.08438	1.13548	1.2413	VARS2_C495	17.0752	21.9026	21.2061	10.7778	31.0437
sp|P58397|ATS12_HUMAN	ADAMTS12	ATS12_HUMAN A disintegrin and metalloproteinase with thrombospondin motifs 12	1526;1531	K.C#NQQAC#K.K	38.2632	32.8197	43.2786	34.0994	29.9784	35.623	29.5077	32.4953	40.4337	27.2223	26.1949	29.0973	34.8461	25.8213	31.4968	38.1205	33.2336	34.1456	27.5048	30.7214	1.14705	1.11641	1.38596	1.24085	ADAMTS12_C1526;1531	13.7221	8.78701	16.5376	5.35054	14.8498
sp|Q9NP84|TNR12_HUMAN	TNFRSF12A	TNR12_HUMAN Tumor necrosis factor receptor superfamily member 12A	64	R.PHSDFC#LGC#AAAPPAPFR.L	17.78	19.3759	18.4409	21.4382	21.4888	20.509	15.8985	13.1279	17.4	20.6597	19.476	16.1719	15.1625	14.167	15.4808	18.5322	21.1453	15.4755	18.7692	14.9368	0.876423	1.19752	0.987376	1.24071	TNFRSF12A_C64	4.32678	2.60886	14.0043	12.392	4.58857
sp|P38606|VATA_HUMAN	ATP6V1A	VATA_HUMAN V-type proton ATPase catalytic subunit A	254	R.VLDALFPC#VQGGTTAIPGAFGC#GK.T	166.052	182.462	184.283	175.439	166.15	194.22	154.066	240.842	167.72	171.459	171.112	140.978	134.479	146.842	148.118	177.599	178.603	187.543	161.183	143.146	0.994378	0.946978	1.10185	1.24068	ATP6V1A_C254	5.65408	8.00664	24.8801	10.8567	5.26258
sp|P11388-4|TOP2A_HUMAN	TOP2A	TOP2A_HUMAN Isoform 4 of DNA topoisomerase 2-alpha	486	K.AAIGC#GIVESILNWVK.F	31.885	41.1231	47.7775	36.7574	30.2591	38.5682	28.4691	31.0636	33.32	36.9402	60.0914	36.6177	31.3359	30.1382	35.9397	40.2619	35.1949	30.9509	44.5498	32.4713	1.14397	1.30083	0.90375	1.23992	TOP2A_C486	19.8232	12.4149	7.84281	30.2143	9.43254
sp|Q96BR5|SELR1_HUMAN	SELRC1	SELR1_HUMAN Sel1 repeat-containing protein 1	179;187	K.AC#DLGHIWAC#ANASR.M	17.0613	15.8645	15.2449	17.5805	14.9575	11.1124	13.6869	11.0003	18.5515	16.552	16.6451	11.9413	14.8129	12.9382	11.1012	16.0569	14.5502	14.4129	15.0462	12.9508	1.10356	1.11406	1.06718	1.23984	SELRC1_C179;187	5.75038	22.3589	26.5566	17.8733	14.3306
sp|Q9UM82|SPAT2_HUMAN	SPATA2	SPAT2_HUMAN Spermatogenesis-associated protein 2	41	R.QRPGSDEC#LR.V	79.1116	76.4786	69.4178	73.5804	75.7393	66.328	79.8932	74.8817	72.38	69.1892	83.2271	79.7264	59.3234	71.4764	50.7284	75.0027	71.8826	75.7183	77.3809	60.5094	1.04341	0.990549	0.969266	1.23952	SPATA2_C41	6.68322	6.85843	5.05272	9.44287	17.2283
sp|Q12841|FSTL1_HUMAN	FSTL1	FSTL1_HUMAN Follistatin-related protein 1	253;255;262	R.C#VC#ACGNWVC#TAMTCDGK.N	138.627	126.174	120.408	120.742	132.07	113.561	105.013	121.873	138.628	106.564	123.688	115.752	106.332	93.3308	111.115	128.403	122.124	121.838	115.334	103.592	1.05141	1.05388	1.11331	1.2395	FSTL1_C253;255;262	7.2521	7.64115	13.7951	7.43037	8.88385
sp|Q96KP1|EXOC2_HUMAN	EXOC2	EXOC2_HUMAN Exocyst complex component 2	619;627	K.EDWIVDNEGLTSLPC#QFEQCIVC#SLQSLK.G	23.2193	24.3158	24.4393	22.4219	25.7642	22.8107	22.5515	29.1417	19.4148	21.3329	32.5946	25.2348	20.7564	21.9238	15.3904	23.9915	23.6656	23.7027	26.3875	19.3569	1.01377	1.01218	0.909199	1.23943	EXOC2_C619;627	2.79897	7.72353	20.9453	21.6719	18.0002
sp|O43396|TXNL1_HUMAN	TXNL1	TXNL1_HUMAN Thioredoxin-like protein 1	34	R.GC#GPC#LR.I	1091.59	1220.06	1110.89	1120.64	1169.15	1173.8	1140.17	1300.57	1057.47	1077.84	1040.3	1163.7	934.921	984.124	842.422	1140.85	1154.53	1166.07	1093.95	920.489	0.988145	0.978366	1.04287	1.23939	TXNL1_C34	6.07235	2.55008	10.6001	5.78246	7.81593
sp|Q9BY89|K1671_HUMAN	KIAA1671	K1671_HUMAN Uncharacterized protein KIAA1671	1590	R.LSSLSSQTEPTSAGDQYDC#SR.D	16.9633	17.4335	10.8705	15.1772	13.3226	11.424	11.6111	17.3989	7.16	12.5137	17.5437	17.4898	12.5217	11.4004	12.6032	15.0891	13.3079	12.0567	15.8491	12.1751	1.13384	1.25152	0.952051	1.23934	KIAA1671_C1590	24.2622	14.1017	42.5819	18.2261	5.52062
sp|P42702|LIFR_HUMAN	LIFR	LIFR_HUMAN Leukemia inhibitory factor receptor	879	K.ETFYPDIPNPENC#K.A	16.8933	14.2161	15.6697	12.8826	11.0788	6.47523	12.0362	12.136	13.2	12.6408	11.6062	13.8933	11.0434	14.5813	12.1418	15.593	10.1455	12.4574	12.7134	12.5888	1.53694	1.25171	1.2265	1.23864	LIFR_C879	8.59517	32.5666	5.1779	9.00831	14.3844
sp|P17936-2|IBP3_HUMAN	IGFBP3	IBP3_HUMAN Isoform 2 of Insulin-like growth factor-binding protein 3	219	R.ETEYGPC#R.R	392.793	364.96	380.28	350.911	333.626	314.566	350.799	373.627	366.39	358.529	340.778	401.49	305.601	299.859	313.926	379.344	333.034	363.605	366.932	306.462	1.13905	1.04329	1.03383	1.23782	IGFBP3_C219	3.67483	5.45887	3.20838	8.50726	2.30799
sp|Q8NFC6|BD1L1_HUMAN	BOD1L1	BD1L1_HUMAN Biorientation of chromosomes in cell division protein 1-like 1	1618	K.EGESGEC#AVAESEDR.A	8.17833	8.50822	10.0266	5.80208	9.70879	3.07758	12.2913	8.18015	5.97	6.86346	8.39437	7.25457	6.5957	9.04815	5.93734	8.90438	6.19615	8.81381	7.50413	7.19373	1.43708	1.01028	1.1866	1.2378	BOD1L1_C1618	11.0706	53.7934	36.3965	10.5993	22.7888
sp|Q96CP7|TLCD1_HUMAN	TLCD1	TLCD1_HUMAN TLC domain-containing protein 1	231	R.SDFC#PEHVPK.K	9.49666	8.69888	7.65851	5.20111	9.75194	7.30002	7.19015	9.44044	7.35	4.02101	6.25739	8.72027	9.32495	6.45533	5.1117	8.61802	7.41769	7.99353	6.33289	6.96399	1.16182	1.07812	1.36083	1.23751	TLCD1_C231	10.6955	30.7062	15.7078	37.1163	30.9046
sp|Q9UKK3|PARP4_HUMAN	PARP4	PARP4_HUMAN Poly [ADP-ribose] polymerase 4	1499	R.TTPVDLC#LLEESVGSLEGSR.C	161.805	193.556	177.645	168.085	164.909	180.679	157.187	172.308	192.22	171.344	160.491	136.852	148.808	130.309	151.797	177.669	171.224	173.905	156.229	143.638	1.03764	1.02164	1.13723	1.23692	PARP4_C1499	8.9355	4.87092	10.1037	11.289	8.10311
sp|Q8TBM8|DJB14_HUMAN	DNAJB14	DJB14_HUMAN DnaJ homolog subfamily B member 14	63	K.NGSTAGNSPHC#R.K	43.2716	42.1955	26.4269	35.0201	41.586	36.537	28.8213	33.1174	39.81	42.0589	27.4353	28.6488	30.3377	29.7507	30.3788	37.298	37.7144	33.9162	32.7143	30.1557	0.988961	1.09971	1.14011	1.23685	DNAJB14_C63	25.2829	9.1149	16.3277	24.8067	1.16523
sp|Q96K58|ZN668_HUMAN	ZNF668	ZN668_HUMAN Zinc finger protein 668	126	R.FM*QPVC#LR.V	78.2833	90.5041	93.8797	76.2028	82.7189	80.6449	75.12	79.6544	82.25	71.3846	80.6167	79.4431	72.6285	67.5604	72.2194	87.5557	79.8555	79.0081	77.1481	70.8028	1.09643	1.10819	1.1349	1.23661	ZNF668_C126	9.37188	4.16874	4.56745	6.51443	3.97637
sp|P35556|FBN2_HUMAN	FBN2	FBN2_HUMAN Fibrillin-2	1876;1878	R.C#EC#AAGFK.L	133.731	122.545	114.952	117.86	114.434	111.097	113.621	108.399	119.095	100.22	93.6764	106.761	107.517	103.29	89.4078	123.743	114.464	113.705	100.219	100.072	1.08106	1.08828	1.23472	1.23654	FBN2_C1876;1878	7.63412	2.95414	4.70358	6.52783	9.4672
sp|Q96QT4|TRPM7_HUMAN	TRPM7	TRPM7_HUMAN Transient receptor potential cation channel subfamily M member 7	29;33;36	R.C#LPGC#QIC#QQLVR.C	214.952	193.58	176.195	197.28	181.762	194.986	140.817	170.852	210.469	167.054	170.098	163.311	159.812	153.609	159.676	194.909	191.343	174.046	166.821	157.699	1.01864	1.11987	1.16837	1.23596	TRPM7_C29;33;36	9.95997	4.37746	20.0726	2.03785	2.24643
sp|Q7LBC6|KDM3B_HUMAN	KDM3B	KDM3B_HUMAN Lysine-specific demethylase 3B	999	K.YILANVGDQFC#QLVMSEK.E	71.0033	63.1682	70.161	73.2854	60.7446	75.4377	55.2864	49.9795	65.49	69.686	95.985	60.463	58.7674	52.645	53.9581	68.1108	69.8226	56.9186	75.378	55.1235	0.975484	1.19664	0.90359	1.2356	KDM3B_C999	6.31491	11.3646	13.8497	24.4532	5.84736
sp|Q9BYC9|RM20_HUMAN	MRPL20	RM20_HUMAN 39S ribosomal protein L20, mitochondrial	93	K.C#QVELNR.K	53.0016	44.9482	44.4647	41.7946	42.9452	46.6808	38.2584	40.9941	41.17	36.0389	35.1002	45.4365	42.6067	31.849	40.8086	47.4715	43.8069	40.1408	38.8586	38.4214	1.08365	1.18262	1.22165	1.23555	MRPL20_C93	10.1015	5.83124	4.06725	14.7097	14.9981
sp|Q9BWG6|SCNM1_HUMAN	SCNM1	SCNM1_HUMAN Sodium channel modifier 1	127	R.APHYNSC#C#R.R	6.18333	9.89051	10.606	5.29945	12.3625	8.53106	9.48565	3.37242	6.82	8.80463	8.59911	7.24226	6.49461	4.99854	10.102	8.89329	8.73101	6.55936	8.21533	7.19838	1.01859	1.35582	1.08252	1.23546	SCNM1_C127	26.6943	40.4968	46.7262	10.3337	36.4457
sp|Q05397-5|FAK1_HUMAN	PTK2	FAK1_HUMAN Isoform 5 of Focal adhesion kinase 1	288	K.GC#NPTHLADFTQVQTIQYSNSEDK.D	10.8733	10.9272	8.94333	7.38645	8.12302	8.3464	4.51813	9.61547	11.41	10.9191	7.43465	9.77951	9.03434	8.6873	7.16366	10.248	7.95196	8.51454	9.37776	8.2951	1.28873	1.20358	1.09279	1.23542	PTK2_C288	11.0282	6.31689	41.9918	18.9453	11.9962
sp|P02769|ALBU_BOVIN_contaminant	ALB	ALBU_BOVIN_contaminant Serum albumin	460	R.C#C#TKPESER.M	33.5766	40.8252	49.2891	28.1144	32.3626	42.3968	22.8822	26.7693	24.18	18.8456	25.9509	25.1878	30.7926	38.8255	30.5366	41.2303	34.2913	24.6105	23.3281	33.3849	1.20236	1.67531	1.76741	1.235	ALB_C460	19.0735	21.3871	8.0413	16.7208	14.1186
sp|Q03405-2|UPAR_HUMAN	PLAUR	UPAR_HUMAN Isoform 2 of Urokinase plasminogen activator surface receptor	144	R.SPEEQC#LDVVTHWIQEGEEGRPK.D	147.957	141.279	155.4	130.41	137.789	133.69	142.6	122.737	139.17	150.684	144.125	131.087	128.869	101.828	129.347	148.212	133.963	134.836	141.965	120.015	1.10636	1.0992	1.044	1.23495	PLAUR_C144	4.76592	2.75978	7.87414	7.02651	13.1246
sp|Q8NCN4|RN169_HUMAN	RNF169	RN169_HUMAN E3 ubiquitin-protein ligase RNF169	28	R.C#DETAAAK.T	38.5933	38.4657	27.9888	34.3208	34.8653	27.6121	41.4284	39.8039	33.95	37.1944	31.1334	32.7256	31.6518	24.7655	28.6911	35.016	32.2661	38.3941	33.6845	28.3694	1.08523	0.912015	1.03953	1.23428	RNF169_C28	17.3807	12.5199	10.245	9.32834	12.1764
sp|P25398|RS12_HUMAN	RPS12	RS12_HUMAN 40S ribosomal protein S12	106	K.VVGC#SC#VVVK.D	32.7833	40.7417	44.6662	32.201	30.7013	32.45	32.5986	30.9119	35.31	26.0557	28.8045	36.0019	33.8377	28.4542	33.4871	39.3971	31.7841	32.9401	30.2874	31.9263	1.23952	1.19602	1.30078	1.234	RPS12_C106	15.3679	2.97615	6.73605	16.9584	9.43431
sp|P22676|CALB2_HUMAN	CALB2	CALB2_HUMAN Calretinin	101	K.IEM*AELAQILPTEENFLLC#FR.Q	309.353	297.156	260.944	251.041	320.509	314.652	201.482	276.772	287.28	233.496	292.715	233.316	223.154	265.938	213.878	289.151	295.401	255.178	253.176	234.323	0.978844	1.13313	1.14209	1.23398	CALB2_C101	8.70757	13.0426	18.3393	13.525	11.8508
sp|Q8IY17-4|PLPL6_HUMAN	PNPLA6	PLPL6_HUMAN Isoform 4 of Neuropathy target esterase	477;491	R.EQPAGAC#EYSYCEDESATGGC#PFGPYQGR.Q	9.92857	7.64978	6.69635	7.74154	8.05493	11.6159	7.77816	5.66744	7.51955	8.3439	7.45421	10.9315	4.14429	9.6805	5.84747	8.09157	9.13746	6.98838	8.90987	6.55742	0.885538	1.15786	0.908157	1.23396	PNPLA6_C477;491	20.5248	23.5526	16.4738	20.2744	43.2421
sp|O75369-8|FLNB_HUMAN	FLNB	FLNB_HUMAN Isoform 8 of Filamin-B	1751	R.FGGVDIPNSPFTVMATDGEVTAVEEAPVNAC#PPGFR.P	56.6416	66.2783	59.6432	64.1507	63.01	62.4503	52.1286	52.0566	63.96	62.4875	60.5009	46.5574	48.3053	43.9043	55.7673	60.8544	63.2037	56.0484	56.5152	49.3256	0.96283	1.08575	1.07678	1.23373	FLNB_C1751	8.10327	1.37109	12.2247	15.3601	12.1579
sp|Q8N4L2|TM55A_HUMAN	TMEM55A	TM55A_HUMAN Type 2 phosphatidylinositol 4,5-bisphosphate 4-phosphatase	78;81	K.C#TVC#NEATPIK.N	12.673	7.82493	10.1345	11.7643	12.1967	10.8837	10.6612	11.1834	10.4469	11.8112	9.50351	10.1643	7.09069	7.7345	10.0103	10.2108	11.6149	10.7639	10.493	8.27851	0.879115	0.948621	0.973107	1.23341	TMEM55A_C78;81	23.7487	5.76117	3.51939	11.3263	18.5294
sp|Q9ULV0|MYO5B_HUMAN	MYO5B	MYO5B_HUMAN Unconventional myosin-Vb	892	R.DAAIVIQC#AFR.M	38.7566	40.563	33.1407	39.8388	32.1577	38.9006	34.2261	33.4791	34.23	31.0011	29.3291	31.7896	29.2384	34.3081	27.6347	37.4868	36.9657	33.9784	30.7066	30.3938	1.0141	1.10325	1.22081	1.23337	MYO5B_C892	10.3254	11.3354	1.27254	4.0916	11.4612
sp|Q12841|FSTL1_HUMAN	FSTL1	FSTL1_HUMAN Follistatin-related protein 1	52;54;58	K.GEPTC#LC#IEQC#K.P	276.592	269.071	276.592	279.661	271.291	249.728	269.153	246.161	303.933	279.832	230.065	285.842	223.694	225.021	218.126	274.085	266.893	273.082	265.246	222.28	1.02695	1.00367	1.03332	1.23306	FSTL1_C52;54;58	1.58432	5.78655	10.651	11.5424	1.64583
sp|Q15361|TTF1_HUMAN	TTF1	TTF1_HUMAN Transcription termination factor 1	887;892	K.ESEGQAPC#MAHAC#NSSTLGGQGR.W	12.7256	5.43797	9.4447	6.95515	10.3327	3.84351	8.77327	7.61707	6.79957	8.60949	7.86627	10.4687	7.76882	5.72994	8.89372	9.20277	7.04378	7.72997	8.98149	7.46416	1.30651	1.19053	1.02464	1.23293	TTF1_C887;892	39.6603	46.0761	12.829	14.9252	21.4858
sp|P51114|FXR1_HUMAN	FXR1	FXR1_HUMAN Fragile X mental retardation syndrome-related protein 1	99	K.GEFYVIEYAAC#DATYNEIVTFER.L	32.4216	48.2967	46.2534	34.9982	29.1911	33.0163	37.141	37.9601	32.74	46.8541	52.3241	34.4869	34.2041	35.4976	33.2928	42.3239	32.4019	35.947	44.555	34.3315	1.30622	1.1774	0.949924	1.2328	FXR1_C99	20.4051	9.11036	7.80985	20.5097	3.22712
sp|O60443|DFNA5_HUMAN	DFNA5	DFNA5_HUMAN Non-syndromic hearing impairment protein 5	45	R.FWC#WQRPK.Y	88.3516	51.8715	86.448	95.8272	77.8645	72.6925	85.4437	69.1871	69.91	76.3184	309.632	72.9768	57.5165	62.054	64.4001	75.557	82.128	74.8469	152.976	61.3235	0.919991	1.00949	0.493915	1.2321	DFNA5_C45	27.1772	14.7847	12.2706	88.6929	5.70654
sp|P02769|ALBU_BOVIN_contaminant	ALB	ALBU_BOVIN_contaminant Serum albumin	192	K.YNGVFQEC#C#QAEDK.G	12.4133	42.8986	32.259	17.0566	21.2083	29.4832	23.6109	24.3071	25.16	21.9192	24.7736	26.9614	24.4622	25.5273	21.1267	29.1903	22.5827	24.3593	24.5514	23.7054	1.29259	1.19832	1.18895	1.23138	ALB_C192	53.0059	28.0139	3.18514	10.2986	9.6848
sp|Q71F56|MD13L_HUMAN	MED13L	MD13L_HUMAN Mediator of RNA polymerase II transcription subunit 13-like	1256	R.QTLPC#VSWSYDR.V	31.955	33.6873	29.5508	25.2079	24.2504	33.9642	33.2301	27.026	26.07	26.9339	28.1135	30.4963	24.3485	25.1664	27.8047	31.731	27.8075	28.7754	28.5145	25.7732	1.1411	1.10271	1.1128	1.23116	MED13L_C1256	6.54673	19.2513	13.5096	6.36438	7.00823
sp|P98170|XIAP_HUMAN	XIAP	XIAP_HUMAN E3 ubiquitin-protein ligase XIAP	12	K.TC#VPADINK.E	52.7333	68.9833	60.1848	53.1038	56.5807	62.758	53.331	62.9557	53.13	53.5211	47.0648	58.3199	55.2927	46.457	46.0174	60.6338	57.4808	56.4722	52.9686	49.2557	1.05485	1.07369	1.14471	1.231	XIAP_C12	13.4155	8.50662	9.94427	10.6627	10.6237
sp|P49454|CENPF_HUMAN	CENPF	CENPF_HUMAN Centromere protein F	2148	K.C#ELENQIAQLNK.E	53.76	61.8574	58.1316	58.6218	59.6335	60.653	52.3472	52.7918	57.33	46.4381	54.4226	59.0343	46.6121	44.626	49.9271	57.9163	59.6361	54.1563	53.2983	47.0551	0.971162	1.06943	1.08664	1.23082	CENPF_C2148	6.99802	1.70301	5.09169	11.957	5.69154
sp|Q9NR09|BIRC6_HUMAN	BIRC6	BIRC6_HUMAN Baculoviral IAP repeat-containing protein 6	381	K.GEHTQNVPLSVTLATSPAQFPC#TDGTDR.I	42.7933	44.9243	43.8853	39.7186	40.5072	39.1715	34.7362	40.5857	34.93	35.8078	30.5959	36.9626	35.8594	29.6972	41.3671	43.8676	39.7991	36.7506	34.4555	35.6412	1.10223	1.19366	1.27317	1.23081	BIRC6_C381	2.4292	1.68725	9.04117	9.84443	16.3799
sp|Q9ULE0|WWC3_HUMAN	WWC3	WWC3_HUMAN Protein WWC3	488	R.DSPLAQLADSC#EGPGLGALDR.L	8.63333	9.42577	12.4703	7.28811	7.22765	9.34354	8.28324	6.68649	8.98	8.19224	6.2318	11.5039	6.74732	7.99231	10.0655	10.1765	7.9531	7.98324	8.64263	8.2684	1.27956	1.27473	1.17747	1.23077	WWC3_C488	19.9051	15.1455	14.7286	30.8324	20.273
##sp|Q13825|AUHM_HUMAN	##AUH	##AUHM_HUMAN ##Methylglutaconyl-CoA hydratase, mitochondrial	202	K.LDAGAC#FIGPVESR.I	123.177	159.881	171.132	104.645	96.5485	118.918	129.398	147.231	110.96	124.79	130.957	146.52	113.63	143.434	111.972	151.397	106.704	129.196	134.089	123.012	1.41885	1.17183	1.12907	1.23075	##AUH_C202	16.5647	10.6143	14.0378	8.35153	14.3932
sp|Q86SQ0|PHLB2_HUMAN	PHLDB2	PHLB2_HUMAN Pleckstrin homology-like domain family B member 2	385	R.NFSC#GSVEFDEADLESLR.Q	15.0383	16.4325	13.0875	14.6527	13.9591	16.8159	18.3154	13.1979	14.45	16.6271	17.2238	14.2628	13.3304	11.0663	11.814	14.8528	15.1426	15.3211	16.0379	12.0702	0.980863	0.969432	0.926104	1.23053	PHLDB2_C385	11.3125	9.84033	17.4116	9.76416	9.55739
sp|Q9Y4K0|LOXL2_HUMAN	LOXL2	LOXL2_HUMAN Lysyl oxidase homolog 2	657	K.ASFC#LEDTEC#EGDIQK.N	43.9483	48.952	54.3024	46.209	48.9646	48.4042	37.639	40.9008	49.06	44.8089	37.7363	43.2195	45.2096	35.7382	38.6838	49.0676	47.8593	42.5332	41.9216	39.8772	1.02525	1.15363	1.17046	1.23047	LOXL2_C657	10.5528	3.04305	13.8314	8.85144	12.1552
sp|Q96IF1|AJUBA_HUMAN	AJUBA	AJUBA_HUMAN LIM domain-containing protein ajuba	493;496;499	R.DYHFEC#YHC#EDC#R.M	10.7645	15.0712	13.025	13.8921	8.88814	10.3518	12.579	10.9671	11.2621	17.2051	10.2281	13.6118	14.1451	9.36417	8.08106	12.9535	11.044	11.6027	13.6817	10.5301	1.1729	1.11642	0.94678	1.23014	AJUBA_C493;496;499	16.6304	23.2959	7.39705	25.5016	30.3484
sp|P54687|BCAT1_HUMAN	BCAT1	BCAT1_HUMAN Branched-chain-amino-acid aminotransferase, cytosolic	4;8;12	K.DC#SNGC#SAEC#TGEGGSK.E	206.361	182.675	168.602	185.839	177.032	188.644	172.833	173.968	160.702	188.632	180.616	191.754	171.5	133.369	148.555	185.879	183.839	169.168	187	151.141	1.0111	1.09879	0.994005	1.22984	BCAT1_C4;8;12	10.266	3.29573	4.34682	3.07242	12.7011
sp|Q9H410|DSN1_HUMAN	DSN1	DSN1_HUMAN Kinetochore-associated protein DSN1 homolog	65	K.GGNC#DLSHQER.L	23.3333	18.6728	14.3471	20.0505	15.3507	18.4286	18.8984	15.4618	13.51	16.916	15.0356	14.3983	14.5434	14.4744	16.8042	18.7844	17.9432	15.9567	15.45	15.274	1.04688	1.17721	1.21582	1.22983	DSN1_C65	23.9249	13.3042	17.0968	8.47242	8.67932
sp|Q9UIG8|SO3A1_HUMAN	SLCO3A1	SO3A1_HUMAN Solute carrier organic anion transporter family member 3A1	35	K.VSC#FSNIK.I	64.7033	69.5553	54.189	53.1366	68.5225	63.8413	50.3189	54.3554	59.1	52.8394	59.7203	55.6964	53.4605	48.9563	50.8377	62.8159	61.8335	54.5914	56.0854	51.0848	1.01589	1.15065	1.12	1.22964	SLCO3A1_C35	12.505	12.7553	8.0513	6.16368	4.42847
sp|Q9BU89|DOHH_HUMAN	DOHH	DOHH_HUMAN Deoxyhypusine hydroxylase	232	R.C#TENPM*VR.H	343.501	374.981	328.925	332.532	305.503	341.365	278.205	320.73	325.56	325.055	264.116	266.399	289.01	279.744	283.28	349.136	326.467	308.165	285.19	284.012	1.06944	1.13295	1.22422	1.2293	DOHH_C232	6.74214	5.72329	8.45589	12.1123	1.64644
sp|Q12852-2|M3K12_HUMAN	MAP3K12	M3K12_HUMAN Isoform 2 of Mitogen-activated protein kinase kinase kinase 12	589	K.GSC#GDLPGLR.T	8.44666	7.50725	10.3289	5.79115	7.47577	5.9582	8.73263	9.34708	6.24	10.1565	7.40905	9.81646	5.35742	6.98993	9.0335	8.76094	6.40837	8.10657	9.12735	7.12695	1.36711	1.08072	0.959856	1.22927	MAP3K12_C589	16.4006	14.4835	20.2975	16.4097	25.8436
sp|P22692|IBP4_HUMAN	IGFBP4	IBP4_HUMAN Insulin-like growth factor-binding protein 4	38;44	R.C#RPPVGC#EELVR.E	183.441	163.357	132.771	176.372	185.303	155.427	147.233	184.217	169.411	150.213	109.187	137.792	134.649	112.392	143.194	159.857	172.367	166.954	132.398	130.078	0.927418	0.957491	1.2074	1.22893	IGFBP4_C38;44	15.9616	8.89705	11.1492	15.8901	12.2248
sp|A1KXE4|F168B_HUMAN	FAM168B	F168B_HUMAN Myelin-associated neurite-outgrowth inhibitor	63	K.VSC#SPTSGAVPPYSSSPNPYQTAVYPVR.S	89.4833	90.9807	82.2408	83.5456	81.597	92.0443	71.5128	81.043	85.87	92.8069	83.3423	77.0783	87.4498	56.6545	69.7061	87.5683	85.7289	79.4753	84.4091	71.2701	1.02146	1.10183	1.03743	1.22868	FAM168B_C63	5.33764	6.48015	9.19263	9.38093	21.6881
tr|F8VWL3|F8VWL3_HUMAN	FGD4	F8VWL3_HUMAN FYVE, RhoGEF and PH domain-containing protein 4	225;239	K.TQGAQTC#VANGVMAAQNQMEC#EEEK.A	21.6093	26.0784	30.7001	25.481	25.542	25.5795	23.9665	21.9949	27.8071	21.725	19.7571	22.5645	21.6257	20.6563	21.5206	26.1293	25.5342	24.5895	21.3488	21.2675	1.02331	1.06262	1.22392	1.2286	FGD4_C225;239	17.3968	0.194816	12.0203	6.74983	2.50124
sp|Q5T200|ZC3HD_HUMAN	ZC3H13	ZC3HD_HUMAN Zinc finger CCCH domain-containing protein 13	57	K.TGNCLYGNTC#R.F	31.4883	25.6677	25.5578	22.5309	27.0444	19.9797	21.8498	25.1006	21.14	20.5788	24.2618	20.6675	24.3358	17.2677	25.7528	27.5712	23.185	22.6968	21.836	22.4521	1.18919	1.21476	1.26265	1.228	ZC3H13_C57	12.3053	15.4302	9.30433	9.6227	20.2448
sp|Q96EB6|SIR1_HUMAN	SIRT1	SIR1_HUMAN NAD-dependent protein deacetylase sirtuin-1	574	K.GC#MEEKPQEVQTSR.N	48.02	41.6116	32.1708	33.4794	44.5525	39.4669	43.8696	41.6826	29.33	38.9276	43.597	43.3304	32.6626	29.617	36.9111	40.6008	39.1663	38.2941	41.9516	33.0636	1.03663	1.06024	0.9678	1.22796	SIRT1_C574	19.6371	14.1517	20.4725	6.25079	11.0802
sp|P51511|MMP15_HUMAN	MMP15	MMP15_HUMAN Matrix metalloproteinase-15	111	R.C#GVPDQFGVR.V	57.0266	68.7807	63.6992	47.0722	55.8255	53.5868	48.9221	52.4417	52.43	51.7186	58.6966	51.4471	48.3179	57.6703	48.3851	63.1688	52.1615	51.2646	53.9541	51.4578	1.21102	1.23221	1.17079	1.22759	MMP15_C111	9.33208	8.71787	3.9572	7.61642	10.4558
sp|Q9HC62|SENP2_HUMAN	SENP2	SENP2_HUMAN Sentrin-specific protease 2	54	R.LDC#FIHQVK.N	82.2149	62.906	68.6621	67.1118	75.2323	64.5184	64.4684	62.4072	69.2	73.372	76.9185	67.6806	57.845	61.3056	55.0145	71.261	68.9542	65.3585	72.657	58.055	1.03345	1.09031	0.980786	1.22747	SENP2_C54	13.9113	8.10612	5.32872	6.41406	5.42728
sp|Q9UMS0|NFU1_HUMAN	NFU1	NFU1_HUMAN NFU1 iron-sulfur cluster scaffold homolog, mitochondrial	210;213	K.LQGSC#TSC#PSSIITLK.N	108.373	99.1089	90.5002	100.431	99.9295	104.622	105.388	91.2739	93.08	100.411	77.9489	91.0629	88.9116	78.3135	75.5586	99.3274	101.661	96.5806	89.8075	80.9279	0.977049	1.02844	1.106	1.22736	NFU1_C210;213	8.99898	2.53458	7.95249	12.564	8.71137
sp|Q8IXI1|MIRO2_HUMAN	RHOT2	MIRO2_HUMAN Mitochondrial Rho GTPase 2	543	K.ADLPEGVAVSGPSPAEFC#R.K	41.545	37.1549	44.6411	41.0298	40.4317	36.02	36.3029	41.4259	44.34	39.5515	35.7017	36.9749	30.3882	35.0833	35.0412	41.1137	39.1605	40.6896	37.4094	33.5043	1.04988	1.01042	1.09902	1.22712	RHOT2_C543	9.14939	6.98696	9.99961	5.24296	8.05464
sp|Q5IJ48|CRUM2_HUMAN	CRB2	CRUM2_HUMAN Protein crumbs homolog 2	94;96	R.C#YC#VPGFQGPR.C	109.521	112.48	103.592	101.628	101.251	86.4062	90.4031	96.249	100.919	92.5557	103.733	82.2645	92.396	89.7613	83.2254	108.531	96.4282	95.8572	92.8512	88.4609	1.12551	1.13222	1.16887	1.22688	CRB2_C94;96	4.17001	9.00293	5.49683	11.5642	5.33748
sp|Q5VWN6|F208B_HUMAN	FAM208B	F208B_HUMAN Protein FAM208B	739	R.IVLSC#DDSVK.I	47.9733	52.5984	47.6893	34.8016	54.4016	46.3484	40.3717	46.2103	38.08	47.2238	41.3832	48.8976	35.5056	40.9239	44.4147	49.4204	45.1838	41.554	45.8349	40.2814	1.09376	1.1893	1.07823	1.22688	FAM208B_C739	5.57655	21.8037	10.0883	8.60704	11.1445
sp|Q7Z5J4|RAI1_HUMAN	RAI1	RAI1_HUMAN Retinoic acid-induced protein 1	728;755	K.PTLGVPAPDPTTAAFDC#FPDTTAASSADSANPFAWPEENLGDAC#PR.W	50.1427	60.7254	58.8608	55.0382	56.5199	65.8328	46.4914	60.0885	52.2424	54.2673	58.3145	49.3086	52.3872	44.0358	41.9727	56.5763	59.1303	52.9408	53.9634	46.1319	0.956808	1.06867	1.04842	1.2264	RAI1_C728;755	9.98501	9.89619	12.8925	8.35865	11.954
sp|P42224|STAT1_HUMAN	STAT1	STAT1_HUMAN Signal transducer and activator of transcription 1-alpha/beta	247;255	R.QQSAC#IGGPPNAC#LDQLQNWFTIVAESLQQVR.Q	53.1509	51.6093	63.8537	55.931	58.4823	54.3842	53.6787	61.3594	55.8108	48.7276	73.5762	47.5981	41.4717	45.3728	50.6697	56.2046	56.2658	56.9496	56.634	45.8381	0.998912	0.986918	0.992418	1.22616	STAT1_C247;255	11.8656	3.67803	6.96221	25.9266	10.0716
tr|R4GN35|R4GN35_HUMAN	DENND4C	R4GN35_HUMAN DENN domain-containing protein 4C	126	R.C#ANVNNSSTTSQR.I	85.0733	91.2072	84.5837	83.8843	98.7707	97.8917	80.3547	96.0964	83.98	83.3321	79.8233	77.6695	66.7783	73.3208	72.7172	86.9547	93.5156	86.8104	80.275	70.9388	0.929842	1.00166	1.08321	1.22577	DENND4C_C126	4.24456	8.93167	9.49619	3.56046	5.09694
sp|Q2YD98|UVSSA_HUMAN	UVSSA	UVSSA_HUMAN UV-stimulated scaffold protein A	567	K.FEPVQHWC#R.A	178.325	192.71	187.734	159.071	153.582	175.053	151.685	151.654	174.26	169.934	153.914	153.479	155.403	144.129	156.338	186.256	162.569	159.2	159.109	151.957	1.14571	1.16995	1.17062	1.22572	UVSSA_C567	3.9223	6.86139	8.19261	5.89361	4.47172
sp|O00329|PK3CD_HUMAN	PIK3CD	PK3CD_HUMAN Phosphatidylinositol 4,5-bisphosphate 3-kinase catalytic subunit delta isoform	366	K.TVSSSEVSVC#SEPVWK.Q	24.815	29.7668	21.5396	30.2342	23.6787	25.4947	22.1291	25.8708	25.58	24.1839	23.9035	22.1948	21.9477	21.4108	18.7469	25.3738	26.4692	24.5266	23.4274	20.7018	0.958617	1.03454	1.08308	1.22568	PIK3CD_C366	16.324	12.7872	8.4862	4.5955	8.28019
sp|P17936-2|IBP3_HUMAN	IGFBP3	IBP3_HUMAN Isoform 2 of Insulin-like growth factor-binding protein 3	268	R.GFC#WC#VDK.Y	103.915	86.8935	96.6257	86.6269	76.0953	80.9035	84.302	77.659	89.37	83.5631	83.7901	95.6274	91.0509	69.7657	73.7371	95.8114	81.2086	83.777	87.6602	78.1846	1.17982	1.14365	1.09299	1.22545	IGFBP3_C268	8.91325	6.49245	7.01045	7.87208	14.4762
sp|Q7Z3T8|ZFY16_HUMAN	ZFYVE16	ZFY16_HUMAN Zinc finger FYVE domain-containing protein 16	377;385	K.DVPSSLSC#LPASGSMC#GSLIESK.A	189.915	200.959	162.163	172.249	179.706	198.008	160.181	161.587	182.415	167.154	165.108	159.771	147.907	148.42	155.004	184.346	183.321	168.061	164.011	150.444	1.00559	1.0969	1.12399	1.22535	ZFYVE16_C377;385	10.8431	7.23038	7.40855	2.32406	2.63052
sp|Q9NYH9|UTP6_HUMAN	UTP6	UTP6_HUMAN U3 small nucleolar RNA-associated protein 6 homolog	381	K.QLSVSLLC#YNFLR.E	104.592	95.5208	105.405	110.611	87.9508	107.9	102.047	84.4388	94.33	87.9192	148.424	87.8801	84.9986	75.4993	88.8537	101.839	102.154	93.6051	108.075	83.1172	0.996919	1.08797	0.942306	1.22525	UTP6_C381	5.3879	12.1138	9.42925	32.3331	8.26917
sp|O43303|CP110_HUMAN	CCP110	CP110_HUMAN Centriolar coiled-coil protein of 110 kDa	436	K.LPTDLAGVC#SSK.V	45.8266	46.8429	45.3338	49.7602	40.723	35.2445	39.2422	41.9043	42.17	34.5137	31.3509	44.9316	39.5742	40.3091	32.7707	46.0011	41.9092	41.1055	36.9321	37.5513	1.09764	1.1191	1.24556	1.22502	CCP110_C436	1.67277	17.4907	3.93902	19.2406	11.0686
sp|Q86YV5|SG223_HUMAN	SGK223	SG223_HUMAN Tyrosine-protein kinase SgK223	610	R.C#PQPAASSASEQR.R	12.5417	11.666	8.76698	12.1614	11.7584	8.61723	10.2144	12.8712	10.3	12.3635	11.4271	8.72027	8.78163	6.86965	11.2676	10.9916	10.8457	11.1285	10.8369	8.97295	1.01345	0.987692	1.01427	1.22497	SGK223_C610	17.9744	17.8909	13.567	17.4582	24.5761
sp|Q8WUA4|TF3C2_HUMAN	GTF3C2	TF3C2_HUMAN General transcription factor 3C polypeptide 2	233	R.QPAAC#PGGEEVDGAPR.D	22.47	24.1662	24.6382	31.5563	26.5805	23.5989	23.9024	20.7363	31.44	30.6891	21.0883	22.047	20.6842	17.6018	19.9004	23.7581	27.2452	25.3596	24.6081	19.3955	0.872011	0.936852	0.965458	1.22493	GTF3C2_C233	4.79948	14.7554	21.6827	21.489	8.25985
sp|O75064|DEN4B_HUMAN	DENND4B	DEN4B_HUMAN DENN domain-containing protein 4B	1239;1248	R.LC#LALDEPQLC#NGHMGGASR.R	7.92078	10.2203	13.2849	10.15	10.8103	12.9089	7.5799	11.7067	10.2041	11.3895	9.24248	8.28815	8.12731	9.45735	8.07295	10.4753	11.2898	9.83023	9.64006	8.55254	0.927862	1.06562	1.08665	1.22482	DENND4B_C1239;1248	25.6904	12.7602	21.2473	16.4778	9.16759
sp|P17036|ZNF3_HUMAN	ZNF3	ZNF3_HUMAN Zinc finger protein 3	267	K.TFSC#SSALILHR.R	34.3466	32.4957	25.3058	25.2953	36.2461	22.1709	18.1818	19.7911	31.13	31.8099	32.6817	28.5626	28.9857	18.9918	27.2583	30.7161	27.9041	23.0343	31.0181	25.0786	1.10077	1.33349	0.990263	1.22479	ZNF3_C267	15.5486	26.4885	30.6373	6.99832	21.2996
sp|Q12959-2|DLG1_HUMAN	DLG1	DLG1_HUMAN Isoform 2 of Disks large homolog 1	378	K.LLAVNNVC#LEEVTHEEAVTALK.N	148.913	144.807	129.149	133.382	129.256	139.993	124.103	138.374	124.56	133.988	137.893	134.942	120.277	114.632	110.454	140.956	134.211	129.012	135.608	115.121	1.05026	1.09258	1.03944	1.22442	DLG1_C378	7.39904	4.0355	6.28683	1.50127	4.2821
sp|Q99081-3|HTF4_HUMAN	TCF12	HTF4_HUMAN Isoform 3 of Transcription factor 12	129	R.DTGLPGC#QSSLLR.Q	33.74	40.5034	27.7369	38.4292	33.8513	33.878	31.5176	28.473	31.13	37.853	28.9452	28.9198	27.9496	24.7254	30.6823	33.9934	35.3862	30.3735	31.906	27.7858	0.960642	1.11918	1.06542	1.22341	TCF12_C129	18.789	7.44749	5.45633	16.142	10.7316
sp|O15392-2|BIRC5_HUMAN	BIRC5	BIRC5_HUMAN Isoform 2 of Baculoviral IAP repeat-containing protein 5	31	K.NWPFLEGC#ACTPER.M	52.1733	68.0777	48.5459	51.3664	54.4447	52.7005	39.3879	60.2834	56.72	53.3478	46.9496	38.2066	43.3016	44.479	50.2185	56.2656	52.8372	52.1304	46.168	45.9997	1.06489	1.07932	1.21871	1.22317	BIRC5_C31	18.4643	2.92159	21.4429	16.4633	8.04504
sp|Q14393-2|GAS6_HUMAN	GAS6	GAS6_HUMAN Isoform 2 of Growth arrest-specific protein 6	160;167;171	K.DVNEC#SQENGGC#LQIC#HNK.P	109.344	115.138	103.426	95.6729	101.719	109.459	89.7938	81.1427	90.2399	92.299	85.7978	89.9076	94.826	85.5448	87.8812	109.303	102.284	87.0588	89.3348	89.4173	1.06862	1.2555	1.22352	1.22239	GAS6_C160;167;171	5.35749	6.75618	5.89067	3.68083	5.39884
sp|P55268|LAMB2_HUMAN	LAMB2	LAMB2_HUMAN Laminin subunit beta-2	1437;1442	R.C#GGLSC#NGAAATADLALGR.A	316.621	372.444	322.485	358.878	350.458	346.322	250.989	330.995	358.592	334.668	246.302	233.839	291.938	262.072	273.691	337.183	351.886	313.525	271.603	275.9	0.958217	1.07546	1.24146	1.22212	LAMB2_C1437;1442	9.09803	1.81847	17.8258	20.2392	5.45678
sp|Q13444|ADA15_HUMAN	ADAM15	ADA15_HUMAN Disintegrin and metalloproteinase domain-containing protein 15	583	R.DAICGQLQC#QTGR.T	16.9867	18.0412	11.513	17.9307	16.5912	17.7515	18.1697	17.1305	20.42	15.957	16.8655	12.5508	12.3701	10.8524	14.8616	15.5136	17.4245	18.5734	15.1244	12.6947	0.890334	0.83526	1.02573	1.22205	ADAM15_C583	22.5903	4.17318	9.05331	15.0396	15.9451
sp|P35555|FBN1_HUMAN	FBN1	FBN1_HUMAN Fibrillin-1	1429;1431	R.C#EC#DMGFVPSADGK.A	9.65508	9.84641	8.52157	6.73438	8.11666	9.51608	8.66013	6.63002	8.97521	9.11965	9.02328	12.0931	7.23044	8.77541	6.92699	9.34102	8.12237	8.08845	10.0787	7.64428	1.15004	1.15486	0.926811	1.22196	FBN1_C1429;1431	7.66606	17.1238	15.7364	17.3158	12.9675
sp|Q96SD1|DCR1C_HUMAN	DCLRE1C	DCR1C_HUMAN Protein artemis	272	K.LPC#GITSR.N	22.9133	18.7085	19.562	21.7004	21.8124	13.886	17.2223	22.2533	16.58	21.0179	19.0281	19.3866	20.7221	15.2095	14.1452	20.3946	19.133	18.6852	19.8109	16.6923	1.06594	1.09148	1.02947	1.2218	DCLRE1C_C272	10.898	23.7512	16.6265	5.35352	21.1493
sp|Q9HBR0|S38AA_HUMAN	SLC38A10	S38AA_HUMAN Putative sodium-coupled neutral amino acid transporter 10	301	R.QALSTLLC#EQQQK.D	30.555	36.2255	35.9748	31.1957	35.847	33.8165	29.1128	22.6967	28.6	29.4181	35.8808	25.9391	23.5525	35.3239	25.2307	34.2518	33.6197	26.8032	30.4127	28.0357	1.0188	1.2779	1.12623	1.22172	SLC38A10_C301	9.35415	6.93599	13.3026	16.5882	22.7115
sp|A2AJT9|CX023_HUMAN	CXorf23	CX023_HUMAN Uncharacterized protein CXorf23	352	K.DSIAC#TYSNK.N	34.5683	42.8986	35.5844	37.6971	34.9948	32.9178	32.6107	35.0895	35.65	32.8614	35.7145	36.1743	27.4947	32.0628	32.9893	37.6838	35.2032	34.4501	34.9167	30.8489	1.07046	1.09387	1.07925	1.22156	CXorf23_C352	12.06	6.80752	4.69489	5.14013	9.53532
sp|Q9NQW6|ANLN_HUMAN	ANLN	ANLN_HUMAN Actin-binding protein anillin	71	R.C#SDNTEVEVSNLENK.Q	42.1633	37.572	35.2443	38.5603	43.0207	37.5588	29.7687	43.8648	34.49	33	30.5831	29.7696	32.5362	28.2404	33.3535	38.3265	39.7133	36.0411	31.1176	31.3767	0.965081	1.06341	1.23167	1.2215	ANLN_C71	9.18604	7.32189	19.9076	5.39959	8.75394
sp|P78357|CNTP1_HUMAN	CNTNAP1	CNTP1_HUMAN Contactin-associated protein 1	355	R.C#LDPVPHPINFGGPHNFVQVPGFPR.R	195.417	183.129	164.91	187.273	165.351	174.302	152.693	167.886	167.29	177.341	197.703	133.982	156.629	131.111	157.188	181.152	175.642	162.623	169.675	148.309	1.03137	1.11394	1.06764	1.22145	CNTNAP1_C355	8.47308	6.27523	5.29105	19.1806	10.0442
sp|Q9UDR5|AASS_HUMAN	AASS	AASS_HUMAN Alpha-aminoadipic semialdehyde synthase, mitochondrial	534	K.YNINPVSM*DIC#K.Q	274.983	306.248	286.262	276.03	293.626	294.869	235.562	289.293	298.13	294.412	241.556	251.139	249.133	210.313	250.777	289.164	288.175	274.328	262.369	236.741	1.00343	1.05408	1.10213	1.22144	AASS_C534	5.47554	3.65614	12.3436	10.7333	9.6739
sp|Q4L180|FIL1L_HUMAN	FILIP1L	FIL1L_HUMAN Filamin A-interacting protein 1-like	855	K.C#SQSTPC#PVNR.K	37.38	38.2393	32.3597	34.9545	50.7554	43.2092	26.538	46.0469	38.97	31.0127	26.1428	33.6864	30.4514	30.5793	27.3798	35.993	42.973	37.185	30.2806	29.4701	0.837572	0.967945	1.18865	1.22134	FILIP1L_C855	8.82315	18.3908	26.5597	12.6308	6.14677
sp|Q9BRJ7|SDOS_HUMAN	NUDT16L1	SDOS_HUMAN Protein syndesmos	171	K.C#QLLFALK.V	826.291	637.461	565.357	887.806	800.166	766.613	672.279	588.714	709.8	679.031	684.96	584.492	640.288	468.392	552.877	676.37	818.195	656.931	649.495	553.852	0.826661	1.02959	1.04138	1.22121	NUDT16L1_C171	19.9223	7.64799	9.43548	8.67933	15.5189
sp|Q9BXB5|OSB10_HUMAN	OSBPL10	OSB10_HUMAN Oxysterol-binding protein-related protein 10	33	R.ATSAGSSPSC#SLAGR.G	25.6666	19.6499	16.7404	24.1262	21.3485	18.2808	17.6474	21.0163	17.33	25.9864	12.7451	19.9778	19.408	14.8486	16.5736	20.6857	21.2518	18.6646	19.5698	16.9434	0.973358	1.10828	1.05702	1.22087	OSBPL10_C33	22.0074	13.7582	10.9451	33.8791	13.587
sp|P52888|THOP1_HUMAN	THOP1	THOP1_HUMAN Thimet oligopeptidase	689	K.GLQVGGC#EPEPQVC#.-	26.39	23.5108	28.9713	22.7713	22.3302	24.4606	19.7243	24.2487	23.67	26.9108	24.7736	20.064	18.9279	22.1326	23.5672	26.2907	23.1874	22.5477	23.9161	21.5426	1.13384	1.166	1.09929	1.22041	THOP1_C689	10.3901	4.84966	10.9198	14.647	11.026
sp|Q9NVC6|MED17_HUMAN	MED17	MED17_HUMAN Mediator of RNA polymerase II transcription subunit 17	488	K.VLITSQGYEQIC#K.S	15.575	18.9826	19.0077	9.58272	17.9073	19.4872	12.9836	14.1315	20.22	18.5799	14.5494	15.5807	13.9622	13.7393	16.1972	17.8551	15.6591	15.7783	16.2367	14.6329	1.14024	1.13162	1.09968	1.22021	MED17_C488	11.0595	33.9819	24.6488	12.8953	9.28928
sp|Q5TAX3|TUT4_HUMAN	ZCCHC11	TUT4_HUMAN Terminal uridylyltransferase 4	766;771	R.EQPVQC#DEMDC#TSQR.C	52.1334	50.3334	57.0594	54.2098	45.5576	56.2438	46.9907	51.5938	52.3496	57.0445	40.1216	44.6506	41.2102	40.4825	49.0939	53.1754	52.0037	50.3114	47.2722	43.5955	1.02253	1.05693	1.12488	1.21974	ZCCHC11_C766;771	6.54801	10.9115	5.76511	18.5326	10.9543
sp|Q9UPW5-3|CBPC1_HUMAN	AGTPBP1	CBPC1_HUMAN Isoform 3 of Cytosolic carboxypeptidase 1	570;579	K.DC#SLPLTVLTC#AK.A	231.771	207.645	170.25	210.111	206.789	217.908	195.605	203.458	195.277	199.336	179.068	200.892	175.093	155.392	169.449	203.222	211.603	198.113	193.099	166.644	0.960395	1.02579	1.05243	1.2195	AGTPBP1_C570;579	15.2533	2.69741	2.33791	6.30562	6.08808
sp|Q99715|COCA1_HUMAN	COL12A1	COCA1_HUMAN Collagen alpha-1(XII) chain	431	K.VQVEC#SR.G	24.7916	25.2387	30.1806	28.628	24.1641	30.0618	21.8619	23.2102	25.39	27.1996	20.1286	27.4294	25.7131	22.44	17.642	26.737	27.618	23.4874	24.9192	21.9317	0.968101	1.13836	1.07295	1.2191	COL12A1_C431	11.1853	11.1371	7.5798	16.6554	18.5096
sp|Q8IWA4|MFN1_HUMAN	MFN1	MFN1_HUMAN Mitofusin-1	411;418	K.VSC#AMTDEIC#R.L	169.381	236.931	230.748	199.875	212.785	235.888	164.296	179.866	224.258	200.064	172.901	149.675	169.183	162.764	190.627	212.353	216.183	189.473	174.213	174.191	0.982287	1.12075	1.21893	1.21908	MFN1_C411;418	17.5854	8.4399	16.4213	14.4765	8.37656
sp|Q14671-3|PUM1_HUMAN	PUM1	PUM1_HUMAN Isoform 3 of Pumilio homolog 1	234	R.SESGGLGVSMVEYVLSSSPGDSC#LR.K	88.5733	99.0123	82.8454	92.8114	84.6822	99.4182	60.5454	87.9513	111.72	102.571	84.3148	72.5457	76.6339	69.3781	75.8255	90.1437	92.3039	86.7389	86.477	73.9458	0.976596	1.03925	1.0424	1.21905	PUM1_C234	9.09332	7.99651	29.5241	17.4945	5.37742
sp|Q86XI2-2|CNDG2_HUMAN	NCAPG2	CNDG2_HUMAN Isoform 2 of Condensin-2 complex subunit G2	537	R.LVSLIFNSFLPVNQPEEVWC#ER.C	19.2383	21.211	15.6193	14.7838	13.657	21.026	16.4207	8.34352	22.35	19.1576	14.7797	11.6886	15.2889	16.987	13.7324	18.6895	16.489	15.7048	15.2086	15.3361	1.13346	1.19006	1.22888	1.21866	NCAPG2_C537	15.1739	24.0731	44.7676	24.6762	10.6144
sp|Q9H845|ACAD9_HUMAN	ACAD9	ACAD9_HUMAN Acyl-CoA dehydrogenase family member 9, mitochondrial	507	K.FEENTYC#FGR.T	214.725	206.199	196.816	190.059	205.47	194.614	194.134	179.532	173.72	171.945	174.414	188.557	163.3	175.283	168.334	205.913	196.714	182.462	178.305	168.972	1.04676	1.12853	1.15484	1.21862	ACAD9_C507	4.35026	4.02482	5.76432	5.02738	3.56079
sp|P35442|TSP2_HUMAN	THBS2	TSP2_HUMAN Thrombospondin-2	610;622	R.C#VNTQPGFHCLPC#PPR.Y	71.3961	70.7191	75.8573	67.8406	75.019	73.1692	59.0613	74.9829	85.0267	76.8665	68.0138	61.761	55.9955	56.9787	65.8944	72.6575	72.0096	73.0236	68.8804	59.6229	1.009	0.994986	1.05484	1.21862	THBS2_C610;622	3.84227	5.1758	17.9299	11.019	9.14676
sp|Q9Y2D4|EXC6B_HUMAN	EXOC6B	EXC6B_HUMAN Exocyst complex component 6B	32	R.EIESTDTAC#IGPTLR.S	50.4116	47.3076	52.7908	47.7715	48.7057	59.5204	48.3634	49.0926	48.08	47.8362	48.7411	43.8723	40.7872	42.3406	40.3836	50.17	51.9992	48.512	46.8165	41.1705	0.964822	1.03418	1.07163	1.21859	EXOC6B_C32	5.48052	12.5584	1.07683	5.53138	2.50965
sp|P01130|LDLR_HUMAN	LDLR	LDLR_HUMAN Low-density lipoprotein receptor	222	R.C#DGGPDC#K.D	219.228	229.46	198.895	185.219	195.071	206.333	154.637	182.029	179.27	183.961	169.615	178.236	179.385	167.037	185.053	215.861	195.541	171.979	177.271	177.158	1.10392	1.25516	1.21769	1.21846	LDLR_C222	7.20759	5.40309	8.76951	4.07388	5.20006
sp|Q9Y620|RA54B_HUMAN	RAD54B	RA54B_HUMAN DNA repair and recombination protein RAD54B	607;611	K.EC#SSTC#DK.N	65.1985	80.9284	76.5267	73.3204	71.6513	69.4438	69.83	70.2573	61.2506	68.4797	75.5313	68.8513	60.4878	67.7441	54.5486	74.2179	71.4718	67.1127	70.9541	60.9268	1.03842	1.10587	1.046	1.21815	RAD54B_C607;611	10.9342	2.7207	7.57111	5.59276	10.8469
sp|Q9BXR0|TGT_HUMAN	QTRT1	TGT_HUMAN Queuine tRNA-ribosyltransferase	67	K.GITTEQLDALGC#R.I	20.86	22.629	20.5948	18.4552	17.1738	17.5053	14.6353	18.0057	18.25	17.1124	24.8248	32.4054	18.3846	17.7488	16.4764	21.3613	17.7114	16.9637	24.7809	17.5366	1.20607	1.25924	0.862006	1.2181	QTRT1_C67	5.17693	3.75534	11.9083	30.8568	5.54047
sp|Q96D46|NMD3_HUMAN	NMD3	NMD3_HUMAN 60S ribosomal export protein NMD3	218	K.M*VEFLQC#TVPC#R.Y	91.6416	133.236	125.446	106.972	108.987	113.12	94.9658	135.749	120.28	116.066	102.076	86.3652	92.3398	94.9188	100.364	116.774	109.693	116.998	101.503	95.8742	1.06456	0.998088	1.15046	1.218	NMD3_C218	18.9352	2.85694	17.5973	14.6389	4.2729
sp|Q15366-2|PCBP2_HUMAN	PCBP2	PCBP2_HUMAN Isoform 2 of Poly(rC)-binding protein 2	302	K.GYWAGLDASAQTTSHELTIPNDLIGC#IIGR.Q	91.9916	96.9031	103.793	98.384	90.9498	87.4772	71.8164	92.2572	109	90.5422	101.065	84.0989	85.3271	67.8678	87.1538	97.5626	92.2703	91.0245	91.9021	80.1163	1.05736	1.07183	1.06159	1.21776	PCBP2_C302	6.07636	6.03884	20.4587	9.31915	13.289
sp|Q9Y4C4|MFHA1_HUMAN	MFHAS1	MFHA1_HUMAN Malignant fibrous histiocytoma-amplified sequence 1	446	K.C#YPPSPPPVSK.G	22.435	29.8741	25.9608	18.5208	19.8599	23.5004	19.6757	20.5029	23.32	21.4685	18.8361	23.6236	18.4351	27.4118	18.4312	26.09	20.627	21.1662	21.3094	21.426	1.26484	1.23262	1.22434	1.21768	MFHAS1_C446	14.2631	12.493	9.02636	11.2517	24.1939
sp|O75182|SIN3B_HUMAN	SIN3B	SIN3B_HUMAN Paired amphipathic helix protein Sin3b	1052;1056	R.LVGVESAC#DVDC#R.F	25.4216	19.3222	21.6155	20.8391	19.1351	24.2774	25.7863	18.3995	21.2778	23.423	17.3211	15.304	17.2677	20.1481	17.0842	22.1198	21.4172	21.8212	18.6827	18.1667	1.0328	1.01368	1.18397	1.2176	SIN3B_C1052;1056	13.9278	12.2305	17.0626	22.6267	9.45929
sp|Q9Y6A5|TACC3_HUMAN	TACC3	TACC3_HUMAN Transforming acidic coiled-coil-containing protein 3	242	R.HGGVC#APAAVATSPPGAIPK.E	19.81	16.0036	16.6648	18.0072	20.5503	17.4807	17.5624	14.9833	18.25	18.4181	15.3428	15.2358	12.926	13.8195	16.355	17.4928	18.6794	16.9319	16.3322	14.3668	0.936476	1.03312	1.07106	1.21758	TACC3_C242	11.6266	8.78769	10.1712	11.0653	12.3813
sp|Q96BD0|SO4A1_HUMAN	SLCO4A1	SO4A1_HUMAN Solute carrier organic anion transporter family member 4A1	60	K.QPLC#QLWAEK.H	229.6	239.255	240.462	214.426	225.373	249.284	215.194	205.589	224.31	218.591	216.373	185.995	189.671	202.294	190.687	236.439	229.694	215.031	206.986	194.217	1.02936	1.09956	1.14229	1.2174	SLCO4A1_C60	2.518	7.76094	4.35356	8.79881	3.61094
sp|O75385|ULK1_HUMAN	ULK1	ULK1_HUMAN Serine/threonine-protein kinase ULK1	426	R.C#GASVPIPVPTQVQNYQR.I	18.6317	14.7404	17.282	17.9307	15.1026	14.7355	17.5381	21.4481	15.72	12.6292	11.619	16.0364	14.9983	11.8014	14.813	16.8847	15.9229	18.2354	13.4282	13.8709	1.0604	0.92593	1.2574	1.21728	ULK1_C426	11.7017	10.9809	16.0513	17.2365	12.9382
sp|O00622|CYR61_HUMAN	CYR61	CYR61_HUMAN Protein CYR61	50;53	R.DGC#GCC#K.V	319.78	312.892	270.395	255.305	287.191	243.698	275.45	233.784	250.396	290.449	254.837	307.017	272.577	236.082	233.232	301.022	262.065	253.21	284.101	247.297	1.14866	1.18882	1.05956	1.21725	CYR61_C50;53	8.88534	8.5937	8.28359	9.3851	8.87169
sp|O94788|AL1A2_HUMAN	ALDH1A2	AL1A2_HUMAN Retinal dehydrogenase 2	320	K.SPNIIFADADLDYAVEQAHQGVFFNQGQC#C#TAGSR.I	96.8449	94.3888	98.5907	90.047	89.8171	89.0037	80.8284	92.6073	82.6	90.0915	97.0983	78.2977	88.2838	75.1117	74.7206	96.6082	89.6226	85.3452	88.4958	79.372	1.07794	1.13197	1.09167	1.21716	ALDH1A2_C320	2.18506	0.611651	7.44177	10.7365	9.72669
sp|Q14999-2|CUL7_HUMAN	CUL7	CUL7_HUMAN Isoform 2 of Cullin-7	112	R.RGDEGDGGSGQVDC#K.A	15.5283	19.7929	15.6193	12.522	18.3496	12.6796	15.3641	14.2365	15.49	20.9023	20.602	17.5268	15.8322	15.1426	10.8791	16.9802	14.5171	15.0302	19.677	13.9513	1.16967	1.12974	0.862944	1.21711	CUL7_C112	14.348	22.8696	4.59231	9.49455	19.2304
sp|Q00653|NFKB2_HUMAN	NFKB2	NFKB2_HUMAN Nuclear factor NF-kappa-B p100 subunit	738	R.GHTPLDLTC#STK.V	41.545	43.5778	48.4703	38.9865	40.7014	45.5482	38.9993	37.0733	43.46	49.8929	46.6809	41.3474	30.0723	39.32	40.3958	44.531	41.7454	39.8442	45.9737	36.596	1.06673	1.11763	0.968619	1.21683	NFKB2_C738	7.99378	8.15218	8.22236	9.38893	15.5078
sp|Q14573|ITPR3_HUMAN	ITPR3	ITPR3_HUMAN Inositol 1,4,5-trisphosphate receptor type 3	1738	K.LVC#DLITSTK.N	24.3483	27.8602	26.238	25.8089	29.9678	25.1869	23.9874	26.1041	23.4	23.0862	27.4608	26.6535	20.0651	21.2906	23.118	26.1488	26.9879	24.4972	25.7335	21.4912	0.968911	1.06742	1.01614	1.21672	ITPR3_C1738	6.72175	9.63159	5.80608	9.04628	7.14857
sp|Q9UBH6|XPR1_HUMAN	XPR1	XPR1_HUMAN Xenotropic and polytropic retrovirus receptor 1	188	R.VAHVEVAPFYTC#K.K	33.8566	34.2831	51.1029	40.0682	39.7629	40.9688	28.3112	37.3883	43.11	37.7721	36.9429	32.0729	33.9514	34.0141	30.0509	39.7476	40.2666	36.2698	35.596	32.6722	0.987109	1.09588	1.11663	1.21656	XPR1_C188	24.747	1.55699	20.575	8.65024	6.94858
sp|Q9P032|NDUF4_HUMAN	NDUFAF4	NDUF4_HUMAN NADH dehydrogenase [ubiquinone] 1 alpha subcomplex assembly factor 4	87	K.AAETC#QEPK.E	29.365	23.7491	24.4367	24.6506	24.8437	24.8669	24.8011	22.0782	30.12	23.7101	24.2746	27.2324	24.0326	19.3125	20.4104	25.8503	24.7871	25.6665	25.0724	21.2518	1.04289	1.00716	1.03103	1.21638	NDUFAF4_C87	11.8497	0.478934	15.9356	7.54535	11.6224
sp|P21281|VATB2_HUMAN	ATP6V1B2	VATB2_HUMAN V-type proton ATPase subunit B, brain isoform	162	R.GPVVLAEDFLDIMGQPINPQC#R.I	66.5	71.593	76.3584	66.8277	56.4836	66.2542	57.1689	65.838	67.36	69.2238	84.3404	59.1451	53.8901	59.3677	63.0524	71.4838	63.1885	63.4556	70.9031	58.77	1.13128	1.12652	1.00819	1.21633	ATP6V1B2_C162	6.89683	9.20058	8.66333	17.8854	7.84456
sp|Q92558|WASF1_HUMAN	WASF1	WASF1_HUMAN Wiskott-Aldrich syndrome protein family member 1	14	R.HLC#HTALPR.G	94.2199	135.762	111.338	106	111.673	101.708	93.5691	106.984	111.43	105.921	83.0735	89.5306	95.4733	78.7336	106.459	113.773	106.46	103.994	92.8418	93.5554	1.06869	1.09403	1.22545	1.21611	WASF1_C14	18.3504	4.69497	8.94106	12.6865	14.9237
sp|Q9Y4C1|KDM3A_HUMAN	KDM3A	KDM3A_HUMAN Lysine-specific demethylase 3A	496;497	K.VDNESC#C#SR.S	8.44366	10.3847	10.6988	10.6842	7.11733	13.5813	13.962	11.4363	7.66896	10.8904	9.21603	11.0271	6.042	9.15757	9.08117	9.8424	10.4609	11.0224	10.3779	8.09358	0.940873	0.892943	0.948404	1.21608	KDM3A_C496;497	12.4104	30.9508	28.7313	9.71765	21.9573
sp|A1X283|SPD2B_HUMAN	SH3PXD2B	SPD2B_HUMAN SH3 and PX domain-containing protein 2B	664	K.TEPPQGEDQVDIC#NLR.S	11.5383	9.91434	6.28552	6.89475	6.05181	7.91554	9.12128	9.63881	11.01	5.01471	8.75267	11.3191	7.90978	5.22574	9.67701	9.24606	6.95403	9.92337	8.36216	7.60418	1.3296	0.931747	1.1057	1.21592	SH3PXD2B_C664	29.0871	13.4207	9.83519	37.9123	29.4748
sp|P12763|FETUA_BOVIN_contaminant	AHSG	FETUA_BOVIN_contaminant Alpha-2-HS-glycoprotein	219	K.C#NLLAEK.Q	620.13	691.037	762.475	481.136	573.196	574.449	591.147	546.705	594.74	608.352	491.211	753.885	592.665	582.343	530.912	691.214	542.927	577.531	617.816	568.64	1.27313	1.19684	1.1188	1.21556	AHSG_C219	10.2968	9.85704	4.63283	21.2996	5.81711
sp|Q6PJG6|BRAT1_HUMAN	BRAT1	BRAT1_HUMAN BRCA1-associated ATM activator 1	361	K.SSC#AGLLC#R.T	14.3383	17.5646	12.5584	12.8389	15.5125	8.02633	18.0361	17.9007	14.47	13.1838	18.9897	14.0904	14.177	14.1937	8.20785	14.8205	12.1259	16.8022	15.4213	12.1928	1.22221	0.882052	0.961037	1.2155	BRAT1_C361	17.1227	31.2856	12.0277	20.2537	28.3044
sp|Q6VN20|RBP10_HUMAN	RANBP10	RBP10_HUMAN Ran-binding protein 10	501	R.QLC#GGNQAATER.I	79.1816	61.5237	55.0833	63.3858	61.1977	66.5373	71.2456	56.0942	57.89	52.3887	61.9597	65.8085	50.9587	58.3519	51.7969	65.2629	63.7069	61.7433	60.0523	53.7025	1.02442	1.057	1.08677	1.21527	RANBP10_C501	19.1176	4.21342	13.4073	11.507	7.53829
sp|Q86SQ7|SDCG8_HUMAN	SDCCAG8	SDCG8_HUMAN Serologically defined colon cancer antigen 8	276	K.EFLLAANTC#NR.V	29.26	30.3865	23.5801	26.5082	18.5438	30.4927	28.7241	27.4694	21.94	32.6303	19.7575	20.6552	23.6156	21.4509	23.4337	27.7422	25.1815	26.0445	24.3477	22.8334	1.10169	1.06518	1.13942	1.21498	SDCCAG8_C276	13.1503	24.1602	13.8592	29.5182	5.25855
sp|P51828|ADCY7_HUMAN	ADCY7	ADCY7_HUMAN Adenylate cyclase type 7	895	K.VFYTEC#DVNK.E	21.7467	21.1395	19.247	21.2197	23.8081	23.7835	21.704	20.748	16.2	23.0284	12.4764	18.7215	19.7745	17.8023	13.5745	20.7111	22.9371	19.5507	18.0754	17.0504	0.90295	1.05935	1.14581	1.21469	ADCY7_C895	6.29476	6.4847	15.0423	29.3525	18.5779
sp|O15265-2|ATX7_HUMAN	ATXN7	ATX7_HUMAN Isoform b of Ataxin-7	278	K.SAVGPTC#PATVSSLVK.P	52.5583	51.0374	49.8433	50.4704	48.2635	52.0481	40.0681	49.8394	53.66	47.2123	46.4506	36.3098	42.4424	38.2241	45.6532	51.1463	50.2607	47.8558	43.3242	42.1066	1.01762	1.06876	1.18055	1.21469	ATXN7_C278	2.66055	3.78229	14.6476	14.0489	8.84873
sp|Q5VTB9|RN220_HUMAN	RNF220	RN220_HUMAN E3 ubiquitin-protein ligase RNF220	382	R.GSGFIMC#SGK.E	92.5633	71.593	76.371	72.5533	84.3694	81.2358	66.3631	76.387	73.56	71.1304	79.465	60.0689	66.6772	65.8764	65.4929	80.1757	79.3862	72.1034	70.2214	66.0155	1.00995	1.11196	1.14176	1.2145	RNF220_C382	13.7083	7.71083	7.16786	13.8561	0.915372
sp|Q66PJ3|AR6P4_HUMAN	ARL6IP4	AR6P4_HUMAN ADP-ribosylation factor-like protein 6-interacting protein 4	159	R.NC#SASTSQGR.K	183.972	193.771	175.352	175.92	195.114	196.805	124.844	166.672	170.76	174.371	132.685	141.544	156.262	141.309	157.868	184.365	189.28	154.092	149.533	151.813	0.974033	1.19646	1.23293	1.21442	ARL6IP4_C159	4.9985	6.12893	16.4915	14.6867	6.01538
sp|Q13823|NOG2_HUMAN	GNL2	NOG2_HUMAN Nucleolar GTP-binding protein 2	516	K.EETEENSHC#DANTEMQQILTR.V	18.3517	20.6032	18.3779	15.4613	11.78	16.1881	18.0725	18.8692	18.7	21.3992	18.8873	15.7901	14.2022	19.66	13.3681	19.1109	14.4765	18.5472	18.6922	15.7435	1.32014	1.03039	1.0224	1.2139	GNL2_C516	6.76283	16.3252	2.26303	15.0311	21.7067
sp|Q9UBT2|SAE2_HUMAN	UBA2	SAE2_HUMAN SUMO-activating enzyme subunit 2	432;441;444	K.LLVPC#ALDPPNPNC#YVC#ASKPEVTVR.L	84.7589	105.802	108.705	103.413	66.4674	75.3179	85.2573	86.8335	102.727	111.992	111.015	79.5758	70.6398	98.7407	77.1726	99.7555	81.7328	91.6058	100.861	82.1844	1.22051	1.08896	0.98904	1.2138	UBA2_C432;441;444	13.1004	23.6015	10.5486	18.2826	17.8934
sp|Q9UF56|FXL17_HUMAN	FBXL17	FXL17_HUMAN F-box/LRR-repeat protein 17	310	R.ESPENPC#DC#HR.E	23.275	31.459	35.4584	19.9194	23.9915	27.7598	30.9468	22.1599	20.52	21.8383	30.1353	31.6787	29.6048	22.9077	21.8067	30.0641	23.8902	24.5422	27.8841	24.7731	1.25843	1.22499	1.07818	1.21358	FBXL17_C310	20.6569	16.4133	22.8454	18.98	17.0365
sp|O43294|TGFI1_HUMAN	TGFB1I1	TGFI1_HUMAN Transforming growth factor beta-1-induced transcript 1 protein	91	K.PAAPAAPPFSSSSGVLGTGLC#ELDR.L	98.4666	87.5846	105.128	102.547	99.5474	106.681	87.4234	109.738	97.23	79.0684	92.3893	80.1082	76.318	80.5246	83.1106	97.0598	102.925	98.1304	83.8553	79.9844	0.943012	0.98909	1.15747	1.21348	TGFB1I1_C91	9.12426	3.48013	11.3975	8.83533	4.28628
sp|A5YKK6|CNOT1_HUMAN	CNOT1	CNOT1_HUMAN CCR4-NOT transcription complex subunit 1	1457	R.NLTAGMAMITC#R.E	16.8933	21.497	28.4045	19.0671	20.917	23.7097	23.2344	17.4339	17.53	26.4601	16.7504	14.9772	19.9134	17.829	17.3021	22.2649	21.2313	19.3994	19.3959	18.3482	1.04869	1.14771	1.14792	1.21347	CNOT1_C1457	26.0225	11.0082	17.1217	31.8713	7.52628
sp|Q8N806|UBR7_HUMAN	UBR7	UBR7_HUMAN Putative E3 ubiquitin-protein ligase UBR7	424	R.VDGMQYYC#S.-	17.78	14.943	13.4402	12.0084	15.3075	14.5877	15.3641	13.5247	12.07	16.5462	13.9864	12.8957	13.1156	10.8925	14.0359	15.3877	13.9679	13.6529	14.4761	12.6813	1.10165	1.12706	1.06298	1.21341	UBR7_C424	14.3219	12.419	12.091	12.9449	12.7436
sp|O95999|BCL10_HUMAN	BCL10	BCL10_HUMAN B-cell lymphoma/leukemia 10	119;122	K.C#SSC#EPFPDGATNNLSR.S	150.435	159.832	140.95	165.049	145.983	148.484	128.853	141.469	150.732	143.097	115.372	112.938	125.72	124.352	121.853	150.406	153.172	140.351	123.802	123.975	0.981941	1.07164	1.21488	1.21319	BCL10_C119;122	6.27736	6.76465	7.825	13.5327	1.58189
sp|Q9UBB6-3|NCDN_HUMAN	NCDN	NCDN_HUMAN Isoform 3 of Neurochondrin	243;259	K.FELC#QLLPLFLPPTTVPPEC#YR.D	29.6071	36.1443	35.5735	42.8843	32.3857	29.3129	31.0594	33.9662	35.2869	32.2486	50.3311	35.1058	26.0603	23.9727	33.4864	33.775	34.861	33.4375	39.2285	27.8398	0.968847	1.01009	0.86098	1.21319	NCDN_C243;259	10.7202	20.4133	6.46806	24.7797	17.9608
sp|Q9Y305-4|ACOT9_HUMAN	ACOT9	ACOT9_HUMAN Isoform 4 of Acyl-coenzyme A thioesterase 9, mitochondrial	337	K.AYELAWATAC#SFGGSR.P	164.687	167.722	170.1	182.039	166.279	179.743	152.511	166.941	186.35	151.597	177.165	122.958	147.203	119.23	147.778	167.503	176.02	168.601	150.573	138.07	0.951609	0.993487	1.11243	1.21317	ACOT9_C337	1.61975	4.83687	10.0713	18.0096	11.8192
sp|P80404|GABT_HUMAN	ABAT	GABT_HUMAN 4-aminobutyrate aminotransferase, mitochondrial	224	R.TMGC#LATTHSK.A	48.545	48.6422	46.6816	40.8003	43.9161	39.8485	35.7443	38.1235	39.32	38.8351	42.1382	44.1802	41.381	36.2461	40.9907	47.9563	41.5216	37.7292	41.7179	39.5393	1.15497	1.27106	1.14954	1.21288	ABAT_C224	2.30405	5.12396	4.82433	6.4654	7.22994
sp|Q96N06-2|SPT33_HUMAN	SPATA33	SPT33_HUMAN Isoform 2 of Spermatogenesis-associated protein 33	102	R.ASNETLVSC#SSSGSDQQR.T	50.925	52.3959	41.9077	50.9512	47.2818	57.0584	55.0921	46.0936	47.35	52.435	54.8577	41.1996	41.5959	36.5267	41.6342	48.4095	51.7638	49.5119	49.4974	39.9189	0.9352	0.977735	0.978021	1.21269	SPATA33_C102	11.7303	9.54079	9.84255	14.723	7.35939
sp|Q8WV74|NUDT8_HUMAN	NUDT8	NUDT8_HUMAN Nucleoside diphosphate-linked moiety X motif 8, mitochondrial	71	K.C#DPADQDVVHTALR.E	17.9317	17.7672	19.7887	16.4228	16.7638	16.5205	15.9956	16.2786	18.4	13.4958	10.9792	19.4112	16.9315	13.4586	15.3837	18.4958	16.569	16.8914	14.6288	15.2579	1.11629	1.09498	1.26435	1.21221	NUDT8_C71	6.06979	1.05991	7.77972	29.5901	11.4028
sp|O00622|CYR61_HUMAN	CYR61	CYR61_HUMAN Protein CYR61	100	R.AQSEGRPC#EYNSR.I	534.041	531.823	430.602	457.643	546.562	437.928	452.773	458.17	475.62	488.495	383.07	516.984	465.072	373.674	395.92	498.822	480.711	462.188	462.85	411.555	1.03768	1.07926	1.07772	1.21204	CYR61_C100	11.846	12.0393	2.58373	15.2413	11.5812
sp|Q9NSV4|DIAP3_HUMAN	DIAPH3	DIAP3_HUMAN Protein diaphanous homolog 3	781	K.SEYSNLC#EPEQFVVVMSNVK.R	70.1516	83.7118	82.3416	80.6391	75.6099	69.3564	65.1728	69.4088	80.69	74.1577	77.9934	67.0032	66.2855	63.3104	65.3107	78.735	75.2018	71.7572	73.0514	64.9689	1.04698	1.09724	1.0778	1.21189	DIAPH3_C781	9.48109	7.51632	11.1776	7.63571	2.33457
sp|Q8TEX9-2|IPO4_HUMAN	IPO4	IPO4_HUMAN Isoform 2 of Importin-4	735	K.AC#QSC#PSEPNTAALQAALAR.V	72.5316	78.2899	66.294	74.0066	63.4847	82.6392	70.7962	77.9974	74.01	71.061	57.1483	57.4331	59.7656	61.1719	58.2199	72.3718	73.3768	74.2679	61.8808	59.7192	0.986304	0.97447	1.16954	1.21187	IPO4_C735	8.28991	13.0733	4.85741	12.8499	2.47251
sp|P52429|DGKE_HUMAN	DGKE	DGKE_HUMAN Diacylglycerol kinase epsilon	415	K.DC#LVQECK.D	20.195	24.4641	24.2729	17.1768	17.7455	17.8377	17.526	17.1655	20.76	19.146	17.1342	15.3836	18.1066	22.7474	16.0272	22.9773	17.5866	18.4838	17.2213	18.9604	1.30652	1.24311	1.33424	1.21186	DGKE_C415	10.4951	2.03527	10.7091	10.9324	18.1457
sp|P46821|MAP1B_HUMAN	MAP1B	MAP1B_HUMAN Microtubule-associated protein 1B	2065	R.TPQASTYSYETSDLC#YTAEK.K	29.9833	28.8374	26.0364	32.1464	21.5104	32.8439	29.7687	26.0108	29.16	35.3688	21.5362	27.5896	20.381	22.1192	27.5376	28.2857	28.8336	28.3132	28.1648	23.3459	0.980999	0.999031	1.00429	1.21159	MAP1B_C2065	7.17839	22.0287	7.12387	24.6201	15.9886
sp|O43187|IRAK2_HUMAN	IRAK2	IRAK2_HUMAN Interleukin-1 receptor-associated kinase-like 2	493	R.NTSLQEVC#GSVAAVEER.L	78.3999	71.9862	66.0672	56.9391	51.4889	73.0741	60.3389	62.3139	54.8	72.2165	49.8416	60.9064	62.4696	62.6956	53.521	72.1511	60.5007	59.1509	60.9882	59.5621	1.19257	1.21978	1.18304	1.21136	IRAK2_C493	8.54873	18.553	6.58529	18.344	8.78562
sp|Q8TDZ2-4|MICA1_HUMAN	MICAL1	MICA1_HUMAN Isoform 4 of Protein-methionine sulfoxide oxidase MICAL1	106;114	K.C#LVVGAGPC#GLR.V	48.4203	55.0864	62.9107	54.9906	44.0105	44.8774	50.488	51.4461	52.8704	54.7609	45.21	47.7626	34.3121	49.3489	53.7311	55.4725	47.9595	51.6015	49.2445	45.7974	1.15665	1.07502	1.12647	1.21126	MICAL1_C106;114	13.0748	12.7285	2.32316	10.0416	22.2393
sp|Q8WWI1|LMO7_HUMAN	LMO7	LMO7_HUMAN LIM domain only protein 7	1646;1648	K.CVAC#EC#DLGGSSSGAEVR.I	27.8126	37.2102	45.3019	38.0352	37.4502	39.3231	29.6503	34.4465	43.3875	38.5554	30.0704	35.7805	32.4568	25.8414	32.7975	36.7749	38.2695	35.8281	34.8021	30.3653	0.960944	1.02643	1.05669	1.21108	LMO7_C1646;1648	23.8009	2.5038	19.4598	12.431	12.9142
sp|O00622|CYR61_HUMAN	CYR61	CYR61_HUMAN Protein CYR61	39	K.C#APGVGLVR.D	83.9883	96.7244	95.7944	84.5181	78.1234	69.5656	76.0795	76.3287	84.33	80.9171	62.3691	81.8449	85.087	68.8034	74.4535	92.169	77.4024	78.9127	75.0437	76.1146	1.19078	1.16799	1.2282	1.21092	CYR61_C39	7.7032	9.69251	5.94727	14.6399	10.8625
sp|P23497-4|SP100_HUMAN	SP100	SP100_HUMAN Isoform Sp100-C of Nuclear autoantigen Sp-100	270;289	R.EMPCPLPC#DEESPEAELHNHGIQINSC#SVR.L	35.0519	36.804	36.6877	32.5719	34.1742	29.7688	33.5562	43.0276	34.994	32.2281	33.5308	32.3288	32.8814	22.492	34.2778	36.1812	32.1716	37.1926	32.6959	29.8838	1.12463	0.972807	1.1066	1.21073	SP100_C270;289	2.70784	6.93086	13.7235	2.21679	21.5482
sp|Q9P2K8|E2AK4_HUMAN	EIF2AK4	E2AK4_HUMAN Eukaryotic translation initiation factor 2-alpha kinase 4	1245;1255	K.FC#NLSLSSNSLC#R.L	124.961	118.109	108.427	120.975	103.066	106.219	106.268	113.369	109.273	109.544	109.883	105.764	99.5809	90.9039	99.869	117.166	110.086	109.637	108.397	96.7846	1.06431	1.06867	1.08089	1.21058	EIF2AK4_C1245;1255	7.08993	8.6846	3.25122	2.10939	5.26415
sp|Q93009|UBP7_HUMAN	USP7	UBP7_HUMAN Ubiquitin carboxyl-terminal hydrolase 7	223	K.NQGATC#YMNSLLQTLFFTNQLR.K	34.4866	35.3794	35.4206	47.6295	32.0498	36.0323	31.8577	31.9388	36.2	28.9097	59.8611	35.2383	26.5091	28.4676	32.0058	35.0956	38.5705	33.3322	41.3363	28.9942	0.909906	1.0529	0.849024	1.21043	USP7_C223	1.50371	20.9851	7.45214	39.5583	9.60846
sp|Q9NZV1|CRIM1_HUMAN	CRIM1	CRIM1_HUMAN Cysteine-rich motor neuron 1 protein	572	K.C#PELSC#SK.I	20.8717	22.343	20.1414	18.4771	19.4715	19.1056	21.8619	19.546	20.46	21.9885	19.5655	26.0253	17.7022	18.0428	16.5978	21.1187	19.0181	20.6226	22.5264	17.4476	1.11045	1.02405	0.937506	1.2104	CRIM1_C572	5.31005	2.64473	5.65636	14.4866	4.32953
sp|Q6ZV73|FGD6_HUMAN	FGD6	FGD6_HUMAN FYVE, RhoGEF and PH domain-containing protein 6	545	R.NHLQHLC#AQNR.G	156.718	167.197	136.997	163.977	154.337	168.454	103.213	147.733	159.12	136.738	112.774	124.904	145.99	110.636	124.198	153.637	162.256	136.688	124.805	126.941	0.946881	1.124	1.23102	1.2103	FGD6_C545	9.98077	4.44616	21.6147	9.60075	14.0504
sp|Q9H3L0|MMAD_HUMAN	MMADHC	MMAD_HUMAN Methylmalonic aciduria and homocystinuria type D protein, mitochondrial	19	R.LVSYLPGFC#SLVK.R	114.147	123.083	91.4738	89.4569	100.044	114.215	108.314	112.072	100.82	96.227	120.592	100.997	93.856	83.8658	93.8804	109.568	101.239	107.068	105.939	90.5341	1.08227	1.02334	1.03426	1.21024	MMADHC_C19	14.8716	12.2703	5.35008	12.1885	6.37868
sp|Q8NEC7|GSTCD_HUMAN	GSTCD	GSTCD_HUMAN Glutathione S-transferase C-terminal domain-containing protein	140	K.AC#AEVSQWTR.L	47.46	39.8718	45.6236	45.8703	45.7931	52.7497	44.8412	49.4193	40.02	38.8351	35.5353	42.7392	40.4334	33.4929	35.9761	44.3185	48.1377	44.7602	39.0365	36.6341	0.92066	0.990131	1.13531	1.20976	GSTCD_C140	8.93269	8.29769	10.5008	9.23789	9.59961
sp|Q86XJ1|GA2L3_HUMAN	GAS2L3	GA2L3_HUMAN GAS2-like protein 3	33	R.HGPGLANVC#QYDEWIAVR.H	61.2966	69.7817	73.1715	65.4837	64.6389	61.5516	51.1205	58.0429	68.7	70.2407	60.2194	55.3885	55.8739	55.3047	57.6857	68.0833	63.8914	59.2878	61.9495	56.2881	1.06561	1.14835	1.09901	1.20955	GAS2L3_C33	8.98447	3.2397	14.9367	12.2289	2.20893
sp|P10599|THIO_HUMAN	TXN	THIO_HUMAN Thioredoxin	32	K.LVVVDFSATWC#GPC#K.M	665.058	726.726	823.554	790.831	746.336	764.299	713.889	1094.15	684.76	716.584	1022.94	715.456	581.533	641.323	608.923	738.446	767.155	830.931	818.325	610.593	0.962577	0.888697	0.902387	1.20939	TXN_C32	10.8194	2.91788	27.489	21.6538	4.90177
sp|Q7Z4W1|DCXR_HUMAN	DCXR	DCXR_HUMAN L-xylulose reductase	138	R.GVPGAIVNVSSQC#SQR.A	26.7166	21.0799	21.338	20.4657	17.8102	22.5771	19.8701	23.7119	20.51	21.1103	24.4665	25.311	9.90618	26.5831	20.6775	23.0449	20.2844	21.364	23.6293	19.0556	1.13609	1.07868	0.975267	1.20935	DCXR_C138	13.81	11.7757	9.63489	9.40338	44.3751
sp|Q9P0W5-5|SCHI1_HUMAN	SCHIP1	SCHI1_HUMAN Isoform 5 of Schwannomin-interacting protein 1	358	K.LALGSFFDDGPGIYTSC#SK.S	276.838	260.645	227.614	259.651	244.446	263.638	260.363	218.717	257.1	234.097	242.925	226.628	214.967	214.068	203.642	255.032	255.912	245.393	234.55	210.892	0.996564	1.03928	1.08733	1.2093	SCHIP1_C358	9.83697	3.95758	9.43792	3.47799	2.98489
sp|Q8IVL0|NAV3_HUMAN	NAV3	NAV3_HUMAN Neuron navigator 3	748	R.LGQAC#PR.L	187.798	157.76	130.938	144.56	167.552	132.262	163.94	134.278	147.66	145.531	131.072	136.95	137.777	112.08	144.257	158.832	148.125	148.626	137.851	131.371	1.07228	1.06867	1.1522	1.20903	NAV3_C748	17.9091	12.0932	9.99458	5.2746	12.9543
sp|P21359|NF1_HUMAN	NF1	NF1_HUMAN Neurofibromin	1032	R.RDDLSFC#QEM*K.F	540.563	567.739	556.829	552.345	554.296	579.152	520.229	541.897	530.95	503.135	525.685	533.722	466.071	441.595	469.596	555.044	561.931	531.025	520.847	459.087	0.987744	1.04523	1.06566	1.20902	NF1_C1032	2.46389	2.65966	2.04028	3.04445	3.32197
sp|P47736-4|RPGP1_HUMAN	RAP1GAP	RPGP1_HUMAN Isoform 4 of Rap1 GTPase-activating protein 1	708	K.LGDPAC#PEIK.I	6.74333	11.0821	9.91324	7.72518	12.6969	7.8663	8.86623	12.5795	9.17	8.25001	9.21333	13.8933	8.33939	6.28158	8.32927	9.24623	9.42947	10.2052	10.4522	7.65008	0.980568	0.906029	0.884619	1.20865	RAP1GAP_C708	24.28	30.0185	20.2029	28.8814	15.4922
sp|Q9UNS1|TIM_HUMAN	TIMELESS	TIM_HUMAN Protein timeless homolog	700	R.FAC#STVVR.A	704.211	636.305	590.297	586.349	628.363	683.088	589.361	577.792	554.12	565.091	672.036	605.11	539.306	552.499	506.252	643.605	632.6	573.758	614.079	532.686	1.0174	1.12174	1.04808	1.20823	TIMELESS_C700	8.90402	7.6681	3.13087	8.79911	4.47232
sp|Q12805|FBLN3_HUMAN	EFEMP1	FBLN3_HUMAN EGF-containing fibulin-like extracellular matrix protein 1	159;184	R.IQC#AAGYEQSEHNVCQDIDECTAGTHNC#R.A	21.5033	23.043	21.7678	13.3499	30.926	23.2664	23.6088	19.196	23.688	28.0434	17.0929	24.4689	21.3226	15.0137	18.5576	22.1047	22.5141	22.1643	23.2017	18.298	0.981815	0.997311	0.952718	1.20804	EFEMP1_C159;184	3.72448	39.1409	11.5992	24.0678	17.2832
sp|Q07954|LRP1_HUMAN	LRP1	LRP1_HUMAN Prolow-density lipoprotein receptor-related protein 1	2980;2992	R.TC#ADVDECSTTFPC#SQR.C	113.261	122.127	120.574	97.1744	107.367	119.504	94.1147	99.3905	106.01	100.751	87.4653	109.608	103.698	89.1827	101.792	118.654	108.015	99.8383	99.2748	98.2243	1.09849	1.18846	1.19521	1.20799	LRP1_C2980;2992	3.99052	10.3494	5.96973	11.2263	8.0306
sp|O14672|ADA10_HUMAN	ADAM10	ADA10_HUMAN Disintegrin and metalloproteinase domain-containing protein 10	483;484	K.DEC#C#FDANQPEGR.K	30.9743	36.5097	41.537	32.7278	28.0486	26.3477	35.2514	40.6695	25.0192	40.9093	33.878	33.7723	33.1458	25.9407	31.1642	36.3403	29.0414	33.6467	36.1866	30.0835	1.25133	1.08006	1.00425	1.20798	ADAM10_C483;484	14.5386	11.3764	23.6206	11.3035	12.3725
sp|Q9P2B7|K1430_HUMAN	KIAA1430	K1430_HUMAN UPF0501 protein KIAA1430	104	K.LC#DVTTGLK.I	57.3066	60.8087	52.4759	47.8371	56.462	68.3839	57.4726	43.5964	54.85	53.9371	49.6112	53.4794	51.4262	36.9945	52.8047	56.8638	57.561	51.973	52.3426	47.0751	0.987887	1.0941	1.08638	1.20794	KIAA1430_C104	7.35799	17.9242	14.1841	4.54017	18.6027
sp|Q96DU7|IP3KC_HUMAN	ITPKC	IP3KC_HUMAN Inositol-trisphosphate 3-kinase C	321;325	K.C#SPLC#PVPR.L	63.5074	60.054	50.156	72.7785	57.7681	58.6748	43.6195	66.1331	65.0947	57.457	44.3845	59.1896	52.9277	44.3539	46.5523	57.9058	63.0738	58.2824	53.677	47.9446	0.918065	0.993538	1.07878	1.20776	ITPKC_C321;325	11.9679	13.3442	21.806	15.0792	9.28833
sp|O00622|CYR61_HUMAN	CYR61	CYR61_HUMAN Protein CYR61	64	K.QLNEDC#SK.T	94.4299	66.5643	58.2954	69.319	82.406	60.1359	69.9217	72.1044	68.47	75.4402	56.9819	71.1047	64.2891	54.2221	63.0645	73.0965	70.6203	70.1654	67.8423	60.5252	1.03506	1.04178	1.07745	1.2077	CYR61_C64	25.9003	15.848	2.60727	14.227	9.07539
sp|P12109|CO6A1_HUMAN	COL6A1	CO6A1_HUMAN Collagen alpha-1(VI) chain	247;248	K.NNVEQVC#C#SFECQPAR.G	40.6213	42.632	44.4982	45.3272	42.5366	45.5781	42.6771	44.6948	46.727	50.9167	41.5922	37.3102	33.8142	35.3682	36.6164	42.5839	44.4807	44.6996	43.2731	35.2663	0.957357	0.952667	0.984073	1.2075	COL6A1_C247;248	4.55322	3.79547	4.53011	16.0775	3.98074
sp|Q8TDY2|RBCC1_HUMAN	RB1CC1	RBCC1_HUMAN RB1-inducible coiled-coil protein 1	282	R.ESC#QSTVHQQDETTIDTK.D	8.90166	10.8796	7.3688	4.74219	11.3269	7.12768	8.28324	6.46477	10.26	8.8393	6.15502	9.90268	10.1589	8.54028	3.78824	9.05	7.73226	8.336	8.299	7.4958	1.17042	1.08565	1.09049	1.20734	RB1CC1_C282	19.4483	43.1146	22.7707	23.2723	44.1749
sp|O00622|CYR61_HUMAN	CYR61	CYR61_HUMAN Protein CYR61	229;239	K.C#IVQTTSWSQC#SK.T	50.8919	38.1093	30.2219	33.3565	44.4851	42.0837	33.2851	29.901	26.6126	37.8961	35.3549	23.8448	38.3734	31.131	29.2606	39.7411	39.9751	29.9329	32.3653	32.9216	0.994145	1.32767	1.22789	1.20714	CYR61_C229;239	26.2478	14.6499	11.1462	23.1344	14.6198
sp|Q8NBS9|TXND5_HUMAN	TXNDC5	TXND5_HUMAN Thioredoxin domain-containing protein 5	254	K.VDC#TQHYELC#SGNQVR.G	43.4233	55.2081	52.753	48.296	49.4824	49.4998	39.1329	52.9551	52.21	52.5158	45.2477	38.4037	36.946	40.3224	48.1422	50.4615	49.0928	48.0993	45.3891	41.8036	1.02788	1.04911	1.11175	1.20711	TXNDC5_C254	12.3215	1.4056	16.1627	15.5481	13.7385
sp|P08574|CY1_HUMAN	CYC1	CY1_HUMAN Cytochrome c1, heme protein, mitochondrial	139	R.HLVGVC#YTEDEAK.E	43.0966	54.4812	44.767	40.0136	45.5558	38.7529	46.5295	42.2661	48.66	47.478	44.0065	52.4941	40.4966	40.9773	36.4618	47.4483	41.4408	45.8185	47.9928	39.3119	1.14497	1.03557	0.988653	1.20697	CYC1_C139	12.9566	8.73303	7.10567	8.89123	6.30832
sp|P10586|PTPRF_HUMAN	PTPRF	PTPRF_HUMAN Receptor-type tyrosine-protein phosphatase F	615	K.VMC#VSM*GSTTVRVSWVPPPADSR.N	11.27	15.0264	9.72429	7.44109	10.259	11.7071	9.19416	7.91176	12.32	11.1964	12.6555	11.0728	10.7148	10.1575	8.97279	12.0069	9.80239	9.80864	11.6416	9.94836	1.2249	1.22411	1.03138	1.20692	PTPRF_C615	22.7102	22.1309	23.1169	7.56153	8.94271
tr|S4R3R2|S4R3R2_HUMAN	ANKRD10	S4R3R2_HUMAN Ankyrin repeat domain-containing protein 10 (Fragment)	111	K.EIEIYTVSAMQTPC#R.C	26.7866	24.0351	28.1904	19.1108	21.5967	23.0819	22.4449	21.9732	22.38	20.4286	24.9784	21.6159	20.899	20.4619	24.1136	26.3374	21.2631	22.266	22.341	21.8248	1.23864	1.18285	1.17888	1.20676	ANKRD10_C111	8.02563	9.4362	1.1482	10.5633	9.137
sp|Q99758|ABCA3_HUMAN	ABCA3	ABCA3_HUMAN ATP-binding cassette sub-family A member 3	1494	R.HIGAC#VENTLR.G	148.225	161.227	157.377	141.697	155.718	149.041	111.411	147.57	152.95	128.603	117.764	132.196	123.259	129.374	134.228	155.61	148.819	137.31	126.188	128.953	1.04563	1.13327	1.23316	1.20671	ABCA3_C1494	4.29209	4.71242	16.452	5.9537	4.26242
sp|Q96FF9|CDCA5_HUMAN	CDCA5	CDCA5_HUMAN Sororin	165;185	R.SC#FGFEGLLGAEDLSGVSPVVC#SK.L	76.8898	78.6606	65.567	72.4254	80.4518	80.7271	66.3368	76.0413	73.3839	75.5566	76.3429	73.3956	68.3556	53.428	61.4888	73.7058	77.8681	71.9207	75.0983	61.0908	0.946547	1.02482	0.981457	1.2065	CDCA5_C165;185	9.63807	6.05578	6.97291	2.0322	12.2306
##sp|Q7L0L9|YA043_HUMAN		##YA043_HUMAN ##Transmembrane protein LOC653160	84	R.MPPC#TTPPGPR.T	28.4666	23.1891	26.767	21.3945	23.9268	24.7561	19.1535	24.3421	28.14	25.5704	27.4864	20.2857	21.7835	18.2433	24.9757	26.1409	23.3591	23.8785	24.4475	21.6675	1.11909	1.09475	1.06927	1.20646	_C84	10.3054	7.4969	18.8921	15.2546	15.5425
sp|Q9NS18-2|GLRX2_HUMAN	GLRX2	GLRX2_HUMAN Isoform 2 of Glutaredoxin-2, mitochondrial	78	K.TSC#SYCTMAK.K	11.7133	13.4773	14.4101	9.73569	13.6786	9.73747	16.19	9.8722	9.07	12.3866	10.5441	10.186	13.5199	8.3799	10.9276	13.2002	11.0506	11.7107	11.0389	10.9425	1.19453	1.12719	1.19579	1.20633	GLRX2_C78	10.3753	20.5955	33.3013	10.6966	23.4868
sp|Q9Y2I1|NISCH_HUMAN	NISCH	NISCH_HUMAN Nischarin	848	K.VAGGC#QER.S	176.727	167.114	146.343	148.057	163.442	155.344	155.365	143.45	143.14	148.454	136.639	145.917	127.428	145.612	133.305	163.394	155.614	147.319	143.67	135.449	1.05	1.10912	1.13729	1.20632	NISCH_C848	9.50428	4.94566	4.73159	4.32923	6.85107
sp|Q8TEQ6|GEMI5_HUMAN	GEMIN5	GEMI5_HUMAN Gem-associated protein 5	1421	K.NEPEVEAEQPLC#SSQSQC#K.E	25.7016	17.7314	16.2239	16.248	20.0325	22.6633	17.4774	22.265	16.64	20.937	18.2603	21.7145	16.843	16.2118	16.4157	19.8857	19.6479	18.7941	20.3039	16.4902	1.0121	1.05808	0.9794	1.20591	GEMIN5_C1421	25.6107	16.4134	16.1479	8.92442	1.95343
sp|P98174|FGD1_HUMAN	FGD1	FGD1_HUMAN FYVE, RhoGEF and PH domain-containing protein 1	264	R.C#LFLLAPGPR.D	448.921	447.432	422.629	451.677	432.073	418.046	379.049	330.252	408.96	376.693	372.334	343.293	384.648	348.788	360.575	439.661	433.932	372.754	364.106	364.67	1.0132	1.17949	1.20751	1.20564	FGD1_C264	3.35916	3.89284	10.6585	4.98656	5.01198
sp|Q9NRY6|PLS3_HUMAN	PLSCR3	PLS3_HUMAN Phospholipid scramblase 3	125	R.SGAGQPLGQAAEESNC#CAR.L	16.3217	16.1942	12.0798	8.5119	16.9041	13.9722	16.1535	19.301	15.19	15.7028	14.7413	15.864	10.1083	14.862	12.0204	14.8652	13.1294	16.8815	15.436	12.3302	1.13221	0.880563	0.963021	1.20559	PLSCR3_C125	16.2332	32.4394	12.7358	3.93236	19.3987
sp|Q9NPB8|GPCP1_HUMAN	GPCPD1	GPCP1_HUMAN Glycerophosphocholine phosphodiesterase GPCPD1	83	K.TIGGPC#QVIVHK.W	75.8566	83.6284	79.3311	72.7063	62.9992	64.9616	65.4279	61.4037	66.44	64.9602	67.2317	71.5974	62.3559	74.8444	60.8911	79.6054	66.889	64.4239	67.9298	66.0305	1.19011	1.23565	1.17188	1.20559	GPCPD1_C83	4.89056	7.67322	4.13521	4.96571	11.6131
sp|Q09161|NCBP1_HUMAN	NCBP1	NCBP1_HUMAN Nuclear cap-binding protein subunit 1	616	R.TQIVDC#AAVANWIFSSELSR.D	188.918	192.066	156.999	184.902	164.208	162.004	125.099	123.017	158.45	190.49	147.234	144.574	156.427	157.721	132.273	179.328	170.371	135.522	160.766	148.807	1.05257	1.32324	1.11546	1.20511	NCBP1_C616	10.8188	7.41437	14.6717	16.0331	9.63236
sp|O60333-3|KIF1B_HUMAN	KIF1B	KIF1B_HUMAN Isoform 3 of Kinesin-like protein KIF1B	1101	R.QSYC#NYNTGGQLEGNAATSYQK.Q	175.467	163.873	153.208	149.783	146.214	148.943	165.471	140.381	136.44	164.226	146.146	156.953	148.188	116.437	144.123	164.182	148.313	147.431	155.775	136.249	1.107	1.11362	1.05397	1.20501	KIF1B_C1101	6.78058	1.25802	10.6808	5.83992	12.6814
sp|Q96RL1|UIMC1_HUMAN	UIMC1	UIMC1_HUMAN BRCA1-A complex subunit RAP80	601	R.AC#STVEGK.W	161.56	156.556	144	128.214	146.376	137.051	137.937	143.135	131.18	133.213	149.691	148.737	124.51	125.471	133.572	154.039	137.214	137.417	143.881	127.851	1.12262	1.12096	1.0706	1.20483	UIMC1_C601	5.87286	6.61902	4.36226	6.42917	3.89344
sp|Q06190|P2R3A_HUMAN	PPP2R3A	P2R3A_HUMAN Serine/threonine-protein phosphatase 2A regulatory subunit B'' subunit alpha	571	K.VSPSC#LTR.I	54.3783	56.2091	52.7026	58.3705	58.4685	55.2857	48.0477	60.1084	53	50.5631	46.1946	43.5028	47.7746	41.1912	46.5638	54.43	57.3749	53.7187	46.7535	45.1765	0.948673	1.01324	1.16419	1.20483	PPP2R3A_C571	3.22208	3.15462	11.2855	7.62118	7.75648
sp|Q15038|DAZP2_HUMAN	DAZAP2	DAZP2_HUMAN DAZ-associated protein 2	132	R.FGAGATAGNIPPPPPGC#PPNAAQLAVMQGANVLVTQR.K	56.0933	64.9675	54.4661	57.2122	59.6767	63.1027	53.0152	50.3179	61.27	68.0222	69.3047	49.5503	54.2692	43.7973	47.6201	58.509	59.9972	54.8677	62.2924	48.5622	0.975195	1.06637	0.939263	1.20482	DAZAP2_C132	9.66027	4.93074	10.4	17.7447	10.912
sp|Q58EX7|PKHG4_HUMAN	PLEKHG4	PKHG4_HUMAN Puratrophin-1	26	R.FAVC#SFR.D	41.335	32.4123	28.6942	33.5122	36.7424	29.3232	40.0559	34.0392	29.22	37.6335	29.7002	30.3239	29.4911	25.2199	30.3181	34.1472	33.1926	34.4384	32.5525	28.343	1.02876	0.991543	1.04899	1.20478	PLEKHG4_C26	19.025	11.207	15.7643	13.5512	9.65363
sp|P51991|ROA3_HUMAN	HNRNPA3	ROA3_HUMAN Heterogeneous nuclear ribonucleoprotein A3	94	R.GFGFVTYSC#VEEVDAAMC#AR.P	44.0416	45.6274	47.0343	43.0731	37.4651	32.8193	31.967	38.2635	40.32	49.6503	44.3776	39.4629	36.0236	39.0394	38.4045	45.5678	37.7858	36.8502	44.4969	37.8225	1.20595	1.23657	1.02407	1.20478	HNRNPA3_C94	3.28574	13.5881	11.8104	11.4496	4.20355
sp|Q9NW75|GPTC2_HUMAN	GPATCH2	GPTC2_HUMAN G patch domain-containing protein 2	188	R.TMTQPPEGC#R.D	22.645	17.7314	10.2533	15.0461	15.739	14.3169	19.3357	13.2096	18.85	17.3897	9.18774	13.4499	11.056	14.2739	16.695	16.8766	15.034	17.1318	13.3425	14.0083	1.12256	0.985105	1.26488	1.20476	GPATCH2_C188	36.9737	4.73017	19.8774	30.7443	20.1941
sp|Q5IJ48|CRUM2_HUMAN	CRB2	CRUM2_HUMAN Protein crumbs homolog 2	1065;1071	R.GAPVCAPSPC#LHDGAC#R.D	83.8496	89.8601	76.8672	80.8444	76.2043	77.2897	71.2124	85.7673	87.5275	78.894	77.0688	75.5573	65.1606	69.3336	73.564	83.5256	78.1128	81.5024	77.1734	69.3527	1.0693	1.02482	1.08231	1.20436	CRB2_C1065;1071	7.78508	3.10716	10.9871	2.16497	6.05845
sp|P22105|TENX_HUMAN	TNXB	TENX_HUMAN Tenascin-X	295;297	R.C#VC#NPGYTGEDCGVR.S	20.4897	16.5907	19.5294	18.9846	24.3837	15.1056	20.2673	19.5755	18.6903	23.9965	17.8429	23.1268	16.5838	12.79	17.6402	18.8699	19.4913	19.511	21.6554	15.6714	0.968119	0.967142	0.871373	1.2041	TNXB_C295;297	10.7656	23.9068	4.05146	15.3784	16.2756
sp|P46821|MAP1B_HUMAN	MAP1B	MAP1B_HUMAN Microtubule-associated protein 1B	2041	R.TPDTSTYC#YETAEK.I	61.74	50.4654	49.6292	44.133	50.2699	59.6928	53.3553	42.1844	50.39	49.0032	48.8563	45.6952	43.7818	43.9444	46.7216	53.9448	51.3652	48.6432	47.8516	44.8159	1.05022	1.10899	1.12734	1.2037	MAP1B_C2041	12.5382	15.2584	11.8961	3.90564	3.68707
sp|P51692|STA5B_HUMAN	STAT5B	STA5B_HUMAN Signal transducer and activator of transcription 5B	688	K.YYTPVPC#ESATAK.A	28.28	28.4799	24.21	23.853	21.7693	31.7729	21.704	26.0458	25.05	27.9969	16.4304	26.5057	22.6301	23.9636	20.6775	26.9899	25.7984	24.2666	23.6443	22.4237	1.04619	1.11223	1.1415	1.20363	STAT5B_C688	8.92781	20.4585	9.37264	26.61	7.3705
sp|Q9UKX7|NUP50_HUMAN	NUP50	NUP50_HUMAN Nuclear pore complex protein Nup50	165	K.QLAALNC#SVR.D	22.96	21.199	23.0511	25.3172	18.3388	17.7638	22.8943	20.4095	18.34	18.7532	14.9589	21.3942	21.1896	16.3188	18.3341	22.4034	20.4733	20.5479	18.3688	18.6142	1.09428	1.0903	1.21965	1.20357	NUP50_C165	4.6599	20.538	11.0975	17.6106	13.1485
sp|Q13029|PRDM2_HUMAN	PRDM2	PRDM2_HUMAN PR domain zinc finger protein 2	1204	K.EFAFLC#NLQQHQR.D	42.3033	39.6812	42.7138	46.2637	44.531	35.306	38.5134	48.6025	41.89	37.7952	40.897	33.2429	31.4117	34.6556	37.5546	41.5661	42.0335	43.002	37.3117	34.5406	0.988879	0.966609	1.11402	1.2034	PRDM2_C1204	3.95813	14.0133	11.9428	10.3181	8.89694
sp|P16144|ITB4_HUMAN	ITGB4	ITB4_HUMAN Integrin beta-4	245	R.ISGNLDAPEGGFDAILQTAVC#TR.D	72.7766	81.841	79.2555	81.24	67.4545	74.7852	60.6304	73.7147	86.79	77.9476	67.9099	64.5398	67.7891	61.319	65.25	77.9577	74.4933	73.7117	70.1325	64.786	1.04651	1.0576	1.11158	1.20331	ITGB4_C245	5.98973	9.25911	17.7445	9.94506	5.03185
sp|Q93074-2|MED12_HUMAN	MED12	MED12_HUMAN Isoform 2 of Mediator of RNA polymerase II transcription subunit 12	444	K.C#QEATAGFTIGR.V	150.15	171.57	164.671	157.443	161.392	165.943	136.491	152.412	154.86	144.248	140.324	133.366	142.351	122.892	138.987	162.13	161.593	147.921	139.313	134.743	1.00333	1.09606	1.16379	1.20325	MED12_C444	6.7439	2.63236	6.74274	3.95595	7.71876
sp|Q07954|LRP1_HUMAN	LRP1	LRP1_HUMAN Prolow-density lipoprotein receptor-related protein 1	1097;1104	K.SC#EGVTHVC#DPSVK.F	67.6968	65.007	74.8611	66.7906	65.3321	60.3542	56.4413	65.2914	71.7882	69.3388	63.6802	75.9468	57.3862	50.8265	64.3458	69.1883	64.159	64.507	69.6553	57.5195	1.07839	1.07257	0.993296	1.20287	LRP1_C1097;1104	7.36183	5.25996	11.942	8.81399	11.7536
sp|Q15154|PCM1_HUMAN	PCM1	PCM1_HUMAN Pericentriolar material 1 protein	1325;1328	R.YESASMSSTC#EPC#K.S	92.7765	106.732	101.355	94.7216	95.639	97.5529	92.0156	87.7801	94.0475	90.3361	88.2018	96.0863	78.8035	77.7948	93.5248	100.288	95.9711	91.2811	91.5414	83.3744	1.04498	1.09867	1.09554	1.20286	PCM1_C1325;1328	7.01831	1.50524	3.50303	4.45496	10.5608
sp|Q06203|PUR1_HUMAN	PPAT	PUR1_HUMAN Amidophosphoribosyltransferase	348	K.C#GLPYVEVLC#K.N	124.297	119.365	122.662	126.324	117.433	137.396	115.322	148.923	125.53	132.613	113.388	102.007	94.0329	97.271	113.247	122.108	127.051	129.925	116.003	101.517	0.961096	0.939835	1.05263	1.20284	PPAT_C348	2.05712	7.87168	13.2588	13.3352	10.1328
sp|Q99996-6|AKAP9_HUMAN	AKAP9	AKAP9_HUMAN Isoform 6 of A-kinase anchor protein 9	3585	K.LTGQQGEEPSLVSPSTSC#GSLTER.L	28.6416	19.495	28.9713	27.6227	23.8297	29.2001	28.2626	27.7262	23.6	28.5862	23.4556	29.1291	23.4514	25.9683	14.6916	25.7027	26.8842	26.5296	27.057	21.3704	0.956053	0.96883	0.949946	1.20272	AKAP9_C3585	20.9259	10.2675	9.61659	11.5707	27.6989
sp|P16152|CBR1_HUMAN	CBR1	CBR1_HUMAN Carbonyl reductase [NADPH] 1	227	K.ILLNACC#PGWVR.T	162.412	206.95	271.587	182.476	188.62	237.318	247.538	295.174	180.59	185.071	206.583	200.049	160.533	213.266	159.276	213.65	202.805	241.101	197.234	177.692	1.05347	0.886143	1.08323	1.20236	CBR1_C227	25.6941	14.8158	23.8749	5.59187	17.3417
sp|Q765P7|MTSSL_HUMAN	MTSS1L	MTSSL_HUMAN MTSS1-like protein	365;371	K.SSSSASSEASETC#QSVSEC#SSPTSDWSK.V	22.4591	18.8485	19.5744	22.8028	24.2133	16.8384	20.7795	18.6969	21.7891	16.4456	21.9786	22.4294	17.0882	11.9128	21.6346	20.294	21.2848	20.4219	20.2845	16.8785	0.953448	0.993738	1.00047	1.20236	MTSS1L_C365;371	9.41079	18.3924	7.72108	16.4274	28.8194
sp|Q9Y6K5|OAS3_HUMAN	OAS3	OAS3_HUMAN 2'-5'-oligoadenylate synthase 3	175;183	K.PQVYSTLLNSGC#QGGEHAAC#FTELR.R	78.5041	72.7387	82.3198	78.8773	79.0822	84.7745	77.3155	72.3623	85.0877	68.9998	68.9301	68.8742	61.3982	57.0338	75.8268	77.8542	80.9113	78.2552	68.9347	64.7529	0.962216	0.994876	1.12939	1.20233	OAS3_C175;183	6.19555	4.13683	8.19693	0.0912715	15.1891
sp|P33981|TTK_HUMAN	TTK	TTK_HUMAN Dual specificity protein kinase TTK	229	R.NNSC#DSR.G	2831.45	2677.31	2469.81	2565.22	2711.34	2643.08	1807.53	2485.44	2582.25	2372.2	1854.13	2019.47	2325.32	1986.16	2326.27	2659.52	2639.88	2291.74	2081.93	2212.58	1.00744	1.16048	1.27743	1.202	TTK_C229	6.82369	2.76958	18.4192	12.7105	8.86259
sp|Q05932|FOLC_HUMAN	FPGS	FOLC_HUMAN Folylpolyglutamate synthase, mitochondrial	111;116	K.GSTC#AFTEC#ILR.S	216.963	235.652	230.458	213.014	216.542	220.602	236.861	229.081	219.231	211.495	211.48	239.795	180.371	201.579	186.333	227.691	216.719	228.391	220.923	189.428	1.05063	0.996936	1.03063	1.20199	FPGS_C111;116	4.23681	1.75192	3.86845	7.39782	5.77388
sp|Q86UP3-2|ZFHX4_HUMAN	ZFHX4	ZFHX4_HUMAN Isoform 2 of Zinc finger homeobox protein 4	618	K.C#DTVLGSSR.S	172.48	193.032	176.637	173.44	180.325	182.685	127.443	164.233	170.66	161.222	125.225	149.082	158.625	144.503	147.948	180.716	178.816	154.112	145.176	150.359	1.01062	1.17263	1.24481	1.2019	ZFHX4_C618	6.01285	2.68643	15.131	12.6149	4.89713
sp|Q66PJ3-3|AR6P4_HUMAN	ARL6IP4	AR6P4_HUMAN Isoform 3 of ADP-ribosylation factor-like protein 6-interacting protein 4	159	R.NC#SASTSQER.S	159.787	160.727	135.347	139.763	157.272	144.56	112.297	181.842	143.43	153.388	117.061	117.564	132.672	108.899	137.737	151.953	147.198	145.857	129.337	126.436	1.0323	1.0418	1.17486	1.20182	ARL6IP4_C159	9.46971	6.14633	23.8836	16.1051	12.1779
sp|O14920|IKKB_HUMAN	IKBKB	IKKB_HUMAN Inhibitor of nuclear factor kappa-B kinase subunit beta	464	R.NNSC#LSK.M	188.37	173.989	150.991	149.914	192.73	175.681	136.783	156.648	175.07	151.643	135.59	125.569	134.529	137.7	154.966	171.117	172.775	156.167	137.601	142.399	0.990402	1.09573	1.24358	1.20168	IKBKB_C464	11.0184	12.4759	12.2613	9.55857	7.72368
sp|Q96FX2|DPH3_HUMAN	DPH3	DPH3_HUMAN DPH3 homolog	66	K.DQFVC#GETVPAPSANK.E	67.0716	67.0767	65.1225	69.9855	68.3067	62.1795	55.4321	69.3038	56.47	53.9602	53.4117	50.4618	57.3522	54.4359	54.0431	66.4236	66.8239	60.402	52.6112	55.2771	0.99401	1.09969	1.26254	1.20165	DPH3_C66	1.69635	6.1488	12.792	3.57635	3.27046
sp|P30307|MPIP3_HUMAN	CDC25C	MPIP3_HUMAN M-phase inducer phosphatase 3	42	R.DTSFTVC#PDVPR.T	10.1033	12.1069	10.9965	8.57746	10.8415	9.86057	8.90266	12.4511	8.72	10.688	8.6247	7.96895	12.2058	8.60711	6.82369	11.0689	9.75984	10.0246	9.0939	9.21221	1.13413	1.10418	1.21718	1.20155	CDC25C_C42	9.06831	11.633	20.9825	15.6035	29.7607
sp|Q8NFC6|BD1L1_HUMAN	BOD1L1	BD1L1_HUMAN Biorientation of chromosomes in cell division protein 1-like 1	74	R.DC#LADVDTK.P	593.565	347.479	346.17	388.302	373.152	363.413	343.317	356.939	363.19	353.087	372.398	347.259	353.577	342.066	375.728	429.071	374.956	354.482	357.581	357.124	1.14432	1.21042	1.19993	1.20146	BOD1L1_C74	33.2013	3.34499	2.86662	3.67981	4.79078
sp|Q96QT4|TRPM7_HUMAN	TRPM7	TRPM7_HUMAN Transient receptor potential cation channel subfamily M member 7	29;36	R.C#LPGCQIC#QQLVR.C	160.84	160.111	157.492	156.255	151.229	168.283	120.162	152.759	175.209	152.413	130.624	125.552	132.737	131.426	134.055	159.481	158.589	149.377	136.196	132.739	1.00562	1.06764	1.17096	1.20146	TRPM7_C29;36	1.10386	5.52594	18.5296	10.4781	0.990431
sp|O14867|BACH1_HUMAN	BACH1	BACH1_HUMAN Transcription regulator protein BACH1	299	K.DPASQC#PTEK.S	34.3933	37.286	30.1806	33.7526	26.5805	30.9851	31.8577	29.1382	26.61	29.7301	30.3144	33.9081	28.4297	28.4141	27.9626	33.9533	30.4394	29.2019	31.3175	28.2688	1.11544	1.16271	1.08416	1.20109	BACH1_C299	10.5236	11.8828	8.98716	7.22411	0.938619
sp|Q02833|RASF7_HUMAN	RASSF7	RASF7_HUMAN Ras association domain-containing protein 7	151;152	R.PGPAAPVTPTPGC#C#TDLR.G	96.2111	114.105	113.025	101.649	90.1172	102.608	91.5893	105.534	108.828	105.253	97.6074	91.3515	87.7724	84.8659	96.5979	107.78	98.1247	101.984	98.0706	89.7454	1.0984	1.05684	1.09901	1.20096	RASSF7_C151;152	9.30957	7.08414	8.97312	7.09924	6.80791
sp|Q9NS15|LTBP3_HUMAN	LTBP3	LTBP3_HUMAN Latent-transforming growth factor beta-binding protein 3	113;117;123	R.VVVC#PLPC#MNGGQC#SSR.N	160.652	175.885	157.233	172.487	161.654	169.274	137.628	163.693	161.27	157.08	144.229	149.788	132.26	136.056	142.831	164.59	167.805	154.197	150.366	137.049	0.980842	1.0674	1.0946	1.20096	LTBP3_C113;117;123	6.03316	3.31571	9.33893	4.28619	3.90757
sp|Q6PH81|CP087_HUMAN	C16orf87	CP087_HUMAN UPF0547 protein C16orf87	16;19	K.SC#PEC#DQQVPVACK.S	4.20498	11.5237	7.46073	5.80905	9.50384	5.72979	11.815	8.62455	6.09862	8.6779	5.56746	7.01692	7.7381	5.87561	5.69668	7.72979	7.01422	8.84607	7.08743	6.43679	1.10202	0.873811	1.09063	1.20088	C16orf87_C16;19	47.4366	30.7437	32.3832	21.9603	17.5632
sp|Q8WYL5|SSH1_HUMAN	SSH1	SSH1_HUMAN Protein phosphatase Slingshot homolog 1	564	R.QPQQGSGLC#EK.D	39.13	43.3157	39.0357	40.3086	40.0541	34.4074	46.6266	39.4421	37.53	37.5872	38.696	41.9632	42.5182	24.3111	34.337	40.4938	38.2567	41.1996	39.4155	33.7221	1.05848	0.982869	1.02736	1.20081	SSH1_C564	6.03614	8.72019	11.6414	5.7718	27.042
sp|P21127|CD11B_HUMAN	CDK11B	CD11B_HUMAN Cyclin-dependent kinase 11B	440	R.SVEEFQC#LNR.I	49.1516	50.3343	50.5235	47.3126	48.641	49.9061	47.2339	54.1571	43.9	46.1839	44.5183	54.1938	40.7114	43.8241	40.3958	50.0032	48.6199	48.4303	48.2987	41.6437	1.02845	1.03248	1.03529	1.20074	CDK11B_C440	1.48686	2.66731	10.8035	10.71	4.55006
sp|O95071|UBR5_HUMAN	UBR5	UBR5_HUMAN E3 ubiquitin-protein ligase UBR5	2094	R.NC#LEVLPTK.M	50.6916	49.5002	46.3038	46.3511	38.3497	43.6524	43.2137	47.984	41.01	40.5221	38.0562	47.3456	40.3702	37.2217	44.4511	48.8319	42.7844	44.0693	41.9746	40.681	1.14135	1.10807	1.16337	1.20036	UBR5_C2094	4.64656	9.51444	8.0892	11.4642	8.91006
sp|Q8IVL5|P3H2_HUMAN	LEPREL1	P3H2_HUMAN Prolyl 3-hydroxylase 2	584;593	R.NDLSHPIHADNC#LLDPEANEC#WK.E	283.326	283.591	248.378	286.838	266.149	264.927	220.831	253.46	288.778	254.388	205.319	226.114	225.374	216.935	236.982	271.765	272.638	254.356	228.607	226.431	0.996798	1.06844	1.18879	1.20021	LEPREL1_C584;593	7.45285	4.51622	13.3601	10.7736	4.44512
sp|Q9NS15|LTBP3_HUMAN	LTBP3	LTBP3_HUMAN Latent-transforming growth factor beta-binding protein 3	701;713	K.ASRPPVC#EDIDECRDPSSC#PDGK.C	212.014	245.069	220.27	238.08	217.013	202.902	239.686	250.594	224.742	246.1	223.421	260.979	199.397	170.76	194.218	225.784	219.332	238.341	243.5	188.125	1.02942	0.947317	0.927246	1.20018	LTBP3_C701;713	7.61944	8.07144	5.4452	7.76726	8.11158
sp|Q99996-6|AKAP9_HUMAN	AKAP9	AKAP9_HUMAN Isoform 6 of A-kinase anchor protein 9	1379	K.ETEQNYEAEIHC#LQK.R	12.9267	18.5656	15.443	18.04	15.8361	10.6607	15.9592	11.1908	14.75	14.1082	12.9626	15.0634	12.7492	13.5121	12.846	15.6451	14.8456	13.9667	14.0448	13.0358	1.05385	1.12017	1.11394	1.20017	AKAP9_C1379	18.056	25.5161	17.7481	7.48902	3.18625
sp|Q7Z7G8|VP13B_HUMAN	VPS13B	VP13B_HUMAN Vacuolar protein sorting-associated protein 13B	2130	R.AVSC#FQK.I	151.947	156.151	144.491	138.725	139.397	151.823	146.584	130.264	142.78	148.292	145.353	141.889	108.564	139.558	129.007	150.863	143.315	139.876	145.178	125.709	1.05267	1.07855	1.03916	1.20009	VPS13B_C2130	3.914	5.14664	6.10458	2.20772	12.5353
sp|P39880-3|CUX1_HUMAN	CUX1	CUX1_HUMAN Isoform 3 of Homeobox protein cut-like 1	813	K.EAQDAPGLDPQGAADC#AQGVLR.Q	40.5416	37.6078	49.8937	46.657	42.902	40.0332	38.1369	46.3153	43.25	34.687	34.486	34.0312	40.6608	33.9072	32.1393	42.681	43.1974	42.5674	34.4014	35.5691	0.988046	1.00267	1.24068	1.19995	CUX1_C813	15.0331	7.68978	9.70626	0.976665	12.6438
sp|Q9BW62|KATL1_HUMAN	KATNAL1	KATL1_HUMAN Katanin p60 ATPase-containing subunit A-like 1	424	K.IEGYSGADITNVC#R.D	9.76499	10.1527	8.55284	10.2602	7.616	8.85112	9.42492	8.47189	6.63	4.72585	8.34318	12.2552	9.29968	7.19041	7.23651	9.49017	8.9091	8.1756	8.4414	7.90887	1.06522	1.16079	1.12424	1.19994	KATNAL1_C424	8.79403	14.8504	17.3788	44.609	15.2323
sp|Q15021|CND1_HUMAN	NCAPD2	CND1_HUMAN Condensin complex subunit 1	1052	K.FC#M*ISATFC#DSQLR.L	77.9216	112.692	97.6712	92.9098	91.7912	102.397	81.7272	112.142	92.21	83.3321	100.041	84.9364	80.5888	79.1881	80.488	96.095	95.6994	95.3596	89.4366	80.0883	1.00413	1.00771	1.07445	1.19986	NCAPD2_C1052	18.1475	6.08931	16.2017	10.3078	0.975474
sp|Q13867|BLMH_HUMAN	BLMH	BLMH_HUMAN Bleomycin hydrolase	73	R.C#WIFSCLNVMR.L	99.9599	142.793	159.771	159.53	132.687	152.586	99.9333	232.72	131	146.178	164.957	121.813	112.973	98.4739	124.041	134.174	148.268	154.551	144.316	111.829	0.904947	0.868155	0.929727	1.19981	BLMH_C73	22.9721	9.39716	44.9402	14.9895	11.4654
sp|Q16549|PCSK7_HUMAN	PCSK7	PCSK7_HUMAN Proprotein convertase subtilisin/kexin type 7	699	R.NVASNQVC#R.S	85.4233	77.5392	83.3115	74.4436	66.6131	75.2038	61.9907	66.1881	65.27	84.372	75.2806	75.0584	79.717	62.9228	62.6274	82.0913	72.0868	64.4829	78.237	68.4224	1.13878	1.27307	1.04926	1.19977	PCSK7_C699	4.97156	6.59708	3.42199	6.79247	14.2972
sp|Q4L180|FIL1L_HUMAN	FILIP1L	FIL1L_HUMAN Filamin A-interacting protein 1-like	849;855	K.C#SQSTPC#PVNR.K	380.68	389.807	338.509	375.286	398.085	380.093	314.64	380.101	381.669	361.887	294.952	314.101	318.553	266.992	338.936	369.666	384.488	358.803	323.647	308.16	0.961449	1.03027	1.14219	1.19959	FILIP1L_C849;855	7.40269	3.1258	10.6617	10.6515	12.0329
sp|Q8N556-2|AFAP1_HUMAN	AFAP1	AFAP1_HUMAN Isoform 2 of Actin filament-associated protein 1	471	K.QTFC#FMNR.R	380.648	369.512	360.529	346.519	335.622	383.122	327.929	267.028	329.3	365.15	351.553	336.211	322.646	311.46	292.059	370.23	355.087	308.086	350.971	308.721	1.04264	1.20171	1.05487	1.19924	AFAP1_C471	2.72224	7.00739	11.5434	4.1252	5.01302
sp|Q05655-2|KPCD_HUMAN	PRKCD	KPCD_HUMAN Isoform 2 of Protein kinase C delta type	261;264	K.C#EDC#GMNVHHKCR.E	30.485	34.6915	28.3263	23.9885	28.1701	31.0322	29.6055	30.407	32.9136	41.1794	29.8073	35.261	23.5923	25.1313	29.2472	31.1676	27.7303	30.9754	35.4159	25.9903	1.12396	1.00621	0.880046	1.1992	PRKCD_C261;264	10.3859	12.7744	5.57122	16.0595	11.2492
sp|Q8IYT8|ULK2_HUMAN	ULK2	ULK2_HUMAN Serine/threonine-protein kinase ULK2	642;645	R.EC#AHC#LLVQGSER.Q	206.691	219.869	191.744	208.088	199.734	194.879	165.517	191.568	197.741	192.912	179.518	178.895	172.667	170.528	172.478	206.101	200.9	184.942	183.775	171.891	1.02589	1.11441	1.12149	1.19902	ULK2_C642;645	6.82762	3.32553	9.2477	4.30897	0.688746
sp|O60244|MED14_HUMAN	MED14	MED14_HUMAN Mediator of RNA polymerase II transcription subunit 14	621	K.LSDDPC#PVESK.K	20.055	20.6747	27.951	27.0654	16.9904	16.7544	26.7444	21.1797	20.72	24.5421	21.0243	20.2241	23.0849	18.2433	15.9543	22.8936	20.2701	22.8814	21.9302	19.0942	1.12943	1.00053	1.04393	1.19898	MED14_C621	19.1793	29.0387	14.6555	10.4745	19.0668
sp|Q14202|ZMYM3_HUMAN	ZMYM3	ZMYM3_HUMAN Zinc finger MYM-type protein 3	743;747	R.HFC#NQQC#LLR.F	49.5325	57.214	58.6778	54.456	49.0546	64.0425	51.5775	50.1781	55.0682	53.9436	64.7136	50.4084	48.548	42.0187	47.4053	55.1415	55.8511	52.2746	56.3552	45.9907	0.987295	1.05484	0.978462	1.19897	ZMYM3_C743;747	8.90858	13.5909	4.81785	13.222	7.58185
sp|Q99832|TCPH_HUMAN	CCT7	TCPH_HUMAN T-complex protein 1 subunit eta	29	K.EGTDSSQGIPQLVSNISAC#QVIAEAVR.T	137.597	134.201	118.178	139.086	121.619	131.117	113.876	136.589	154.46	136.634	152.199	114.435	115.349	105.932	103.982	129.992	130.607	134.975	134.423	108.421	0.995287	0.963081	0.967039	1.19896	CCT7_C29	7.97827	6.69549	15.0694	14.1188	5.60632
sp|Q8WUQ7-2|CATIN_HUMAN	CACTIN	CATIN_HUMAN Isoform 2 of Cactin	699	R.STPEYFLEAC#ADNK.D	97.7666	109.213	96.0841	92.6366	89.2777	99.4305	87.8121	93.5408	84.87	100.364	106.977	87.6831	88.3849	91.0295	73.385	101.021	93.7816	88.741	98.3412	84.2665	1.0772	1.13838	1.02725	1.19883	CACTIN_C699	7.07158	5.51531	4.96886	9.97007	11.2927
sp|Q9UKK3|PARP4_HUMAN	PARP4	PARP4_HUMAN Poly [ADP-ribose] polymerase 4	1002	R.LFAC#GIGSTANR.H	19.355	21.4731	23.7061	21.9408	21.4996	14.8586	19.2871	21.7165	19.91	21.5147	19.8087	14.5215	19.5597	18.9249	15.3594	21.5114	19.433	20.3045	18.615	17.948	1.10695	1.05944	1.1556	1.19854	PARP4_C1002	10.1147	20.4174	6.21462	19.5878	12.6151
sp|B2RTY4-4|MYO9A_HUMAN	MYO9A	MYO9A_HUMAN Isoform 4 of Unconventional myosin-IXa	1149	K.IILLQSTC#R.G	54.25	69.6387	58.6229	52.1532	58.7489	62.9181	55.2864	58.8831	60.34	51.9034	54.7426	55.4254	49.6194	52.6317	50.1092	60.8372	57.9401	58.1698	54.0238	50.7867	1.05	1.04585	1.12612	1.1979	MYO9A_C1149	13.0344	9.36805	4.47176	3.45731	3.18275
sp|Q12841|FSTL1_HUMAN	FSTL1	FSTL1_HUMAN Follistatin-related protein 1	98	K.IQVDYDGHC#K.E	251.183	273.645	253.776	230.695	238.771	252.423	241.574	219.686	263.47	248.251	217.179	289.419	212.705	220.778	216.525	259.535	240.63	241.577	251.616	216.669	1.07856	1.07434	1.03147	1.19784	FSTL1_C98	4.73483	4.56404	9.06222	14.402	1.86381
sp|P62633|CNBP_HUMAN	CNBP	CNBP_HUMAN Cellular nucleic acid-binding protein	140;150	R.C#GETGHVAINC#SK.T	79.6617	78.7872	69.4775	56.9244	64.5322	52.589	52.9041	50.0411	70.8546	68.1772	65.3966	77.7264	61.5809	70.6379	58.0982	75.9754	58.0152	57.9333	70.4334	63.439	1.30958	1.31143	1.07868	1.19761	CNBP_C140;150	7.42918	10.4212	19.4731	9.18191	10.2036
sp|Q9NQ29|LUC7L_HUMAN	LUC7L	LUC7L_HUMAN Putative RNA-binding protein Luc7-like 1	43;44	K.SHLLDC#C#PHDILAGTR.M	75.3224	86.163	94.135	81.2423	79.3865	95.1482	77.9894	69.2253	87.4747	82.9081	78.979	83.8842	71.4032	67.6228	74.5116	85.2068	85.259	78.2298	81.9237	71.1792	0.999387	1.08919	1.04007	1.19707	LUC7L_C43;44	11.0821	10.1038	11.667	3.16945	4.8467
sp|Q92794|KAT6A_HUMAN	KAT6A	KAT6A_HUMAN Histone acetyltransferase KAT6A	259;262	R.WQC#IEC#K.T	38.4993	50.9704	48.4268	41.85	36.2741	35.0437	49.5774	49.9209	43.2765	49.3408	43.8627	52.6485	43.6753	38.8009	32.7207	45.9655	37.7226	47.5916	48.6173	38.399	1.21851	0.965832	0.945456	1.19705	KAT6A_C259;262	14.3365	9.61491	7.86042	9.12712	14.293
sp|Q86YH6|DLP1_HUMAN	PDSS2	DLP1_HUMAN Decaprenyl-diphosphate synthase subunit 2	132;144	K.AAGPSSVNTSC#QNYDM*VSGIYSC#QR.S	65.0625	67.3595	75.7599	67.2743	61.7058	62.6459	64.7018	55.1093	66.1511	75.484	54.9353	60.1857	63.5782	54.5411	55.803	69.394	63.8753	61.9874	63.535	57.9741	1.0864	1.11949	1.09222	1.19698	PDSS2_C132;144	8.11512	4.66678	9.68026	16.8032	8.44189
sp|Q7Z333-4|SETX_HUMAN	SETX	SETX_HUMAN Isoform 4 of Probable helicase senataxin	602;612	K.APPC#NTFVDLTSAC#K.I	548.088	549.617	490.615	529.383	542.173	517.85	516.526	516.323	502.608	505.486	481.175	535.05	459.223	447.089	420.651	529.44	529.802	511.819	507.237	442.321	0.999317	1.03443	1.04377	1.19696	SETX_C602;612	6.35235	2.29652	1.55867	5.3191	4.45899
sp|Q9NUQ3|TXLNG_HUMAN	TXLNG	TXLNG_HUMAN Gamma-taxilin	480	R.DLATPVMQPC#TALDSHK.E	89.5066	110.237	99.8755	94.7127	84.4664	110.153	78.7151	78.4875	98.65	88.5432	80.1816	84.4191	81.6754	79.7895	88.878	99.8732	96.444	85.2842	84.3813	83.4476	1.03556	1.17106	1.18359	1.19684	TXLNG_C480	10.3786	13.4072	13.5731	4.95481	5.74781
sp|Q15697|ZN174_HUMAN	ZNF174	ZN174_HUMAN Zinc finger protein 174	39;45	K.NC#PDPELC#R.Q	34.3546	35.1138	31.5925	35.2872	27.1138	28.9284	28.9721	34.682	34.3453	24.6826	30.0374	28.2762	29.334	28.8057	26.3221	33.687	30.4431	32.6664	27.6654	28.1539	1.10655	1.03124	1.21766	1.19653	ZNF174_C39;45	5.50109	14.0988	9.80775	9.86498	5.71242
sp|P49427|UB2R1_HUMAN	CDC34	UB2R1_HUMAN Ubiquitin-conjugating enzyme E2 R1	191	K.VPTTLAEYC#VK.T	76.4049	79.8152	66.0169	74.4546	72.859	74.6375	77.5856	62.4772	67.63	77.3236	62.2796	76.4748	60.5364	60.6106	64.5944	74.079	73.9837	69.2309	72.026	61.9138	1.00129	1.07003	1.0285	1.19649	CDC34_C191	9.70209	1.32227	11.0938	11.7337	3.74997
sp|Q9HAU4|SMUF2_HUMAN	SMURF2	SMUF2_HUMAN E3 ubiquitin-protein ligase SMURF2	204;220	R.PLSC#FVDENTPISGTNGATC#GQSSDPR.L	10.5408	16.7289	17.3828	15.2242	15.1081	10.7365	14.5591	14.0755	11.5895	17.5351	10.8466	18.7162	13.828	11.5442	11.9483	14.8842	13.6896	13.408	15.6993	12.4402	1.08726	1.11009	0.948077	1.19646	SMURF2_C204;220	25.367	18.6865	11.8837	27.032	9.79713
sp|Q9Y4E5-4|ZN451_HUMAN	ZNF451	ZN451_HUMAN Isoform 3 of Zinc finger protein 451	422;436	R.C#IISDGMDAGLWQLC#TTR.D	76.882	58.9087	63.8324	53.9021	56.611	63.206	61.8749	64.7176	54.474	65.8304	74.4249	55.375	63.5538	46.2938	56.9994	66.541	57.9064	60.3555	65.2101	55.6156	1.14911	1.10248	1.02041	1.19644	ZNF451_C422;436	13.9579	8.26388	8.76165	14.6298	15.6661
sp|Q13126-2|MTAP_HUMAN	MTAP	MTAP_HUMAN Isoform 2 of S-methyl-5'-thioadenosine phosphorylase	136	R.GVC#HIPMAEPFC#PK.T	110.425	127.492	122.763	127.864	109.494	110.411	105.411	110.683	121.3	110.578	109.178	116.086	109.158	91.2166	101.202	120.227	115.923	112.465	111.947	100.525	1.03712	1.06902	1.07396	1.19598	MTAP_C136	7.3293	8.92971	7.19602	3.26194	8.94258
sp|Q14353|GAMT_HUMAN	GAMT	GAMT_HUMAN Guanidinoacetate N-methyltransferase	220	R.TEVMALVPPADC#R.Y	30.835	32.0786	25.2554	27.3714	27.217	28.3507	25.8214	29.2782	23.23	27.4538	27.2049	25.5942	22.9839	28.4141	22.3288	29.3897	27.6463	26.1099	26.751	24.5756	1.06306	1.12562	1.09864	1.19589	GAMT_C220	12.3647	2.22394	11.6216	3.77362	13.5923
sp|Q9P2S5|WRP73_HUMAN	WRAP73	WRP73_HUMAN WD repeat-containing protein WRAP73	288	K.SPQLGLGC#LSFPPPR.A	137.445	126.205	123.632	125.373	115.524	133.973	110.063	121.687	128.78	104.951	111.993	108.474	105.986	106.012	111.85	129.094	124.957	120.177	108.473	107.949	1.03311	1.0742	1.19011	1.19588	WRAP73_C288	5.69011	7.38799	7.86314	3.24616	3.12952
sp|O94979-8|SC31A_HUMAN	SEC31A	SC31A_HUMAN Isoform 8 of Protein transport protein Sec31A	704	K.LVAC#WTK.A	47.005	48.6303	43.1925	47.5749	44.2613	44.231	51.3634	42.9312	42.82	37.3793	37.8514	39.8078	36.7565	41.9931	37.3482	46.2759	45.3557	45.7049	38.3462	38.6992	1.02029	1.01249	1.20679	1.19578	SEC31A_C704	6.03177	4.2374	10.7226	3.35792	7.41058
sp|P35556|FBN2_HUMAN	FBN2	FBN2_HUMAN Fibrillin-2	89	R.GPNVC#GSR.F	411.355	389.126	353.564	363.368	382.537	386.446	405.855	348.398	352.47	358.841	318.461	378.975	331.554	300.18	333.487	384.681	377.45	368.907	352.092	321.74	1.01916	1.04276	1.09256	1.19563	FBN2_C89	7.57789	3.27234	8.69105	8.75221	5.81118
sp|Q9NYK6|EURL_HUMAN	EURL	EURL_HUMAN Protein EURL homolog	157	K.WIDGSAGGISNC#TQR.I	26.1216	32.8412	26.9937	28.4204	30.108	25.8763	22.9915	25.2173	26.32	21.9307	26.7571	23.9192	26.1933	21.9187	23.7858	28.6522	28.1349	24.8429	24.2023	23.9659	1.01839	1.15334	1.18386	1.19554	EURL_C157	12.7527	7.57157	6.8251	10.0222	8.94167
sp|Q6UB35|C1TM_HUMAN	MTHFD1L	C1TM_HUMAN Monofunctional C1-tetrahydrofolate synthase, mitochondrial	61	R.SSC#SPGGR.T	46.1883	48.8686	44.7796	45.0945	42.244	38.6667	52.5901	46.1519	46.17	43.8845	48.3316	41.877	33.6103	42.3673	40.9907	46.6122	42.0017	48.304	44.6977	38.9894	1.10977	0.964975	1.04283	1.19551	MTHFD1L_C61	4.45636	7.66808	7.68437	7.39019	12.0778
sp|Q24JP5-2|T132A_HUMAN	TMEM132A	T132A_HUMAN Isoform 2 of Transmembrane protein 132A	924;926	K.GEGSC#PC#ESGGGGEAPTLAPGPPGGTTSSSSTLAR.K	21.4652	22.2764	15.4324	14.4904	21.1208	18.5389	10.0569	14.0522	18.5093	17.0291	18.8823	16.0152	17.4776	16.5317	15.4919	19.7247	18.05	14.2061	17.3089	16.5004	1.09278	1.38846	1.13957	1.19541	TMEM132A_C924;926	18.9573	18.5161	29.7639	8.39969	6.01945
sp|P48729-2|KC1A_HUMAN	CSNK1A1	KC1A_HUMAN Isoform 2 of Casein kinase I isoform alpha	153	K.C#LESPVGK.R	209.358	199.538	209.173	197.664	199.203	220.503	210.883	196.744	202.5	187.705	192.866	213.523	176.378	172.677	168.067	206.023	205.79	203.375	198.031	172.374	1.00113	1.01302	1.04036	1.19521	CSNK1A1_C153	2.7264	6.20285	3.49596	6.89908	2.41563
sp|Q0VF96|CGNL1_HUMAN	CGNL1	CGNL1_HUMAN Cingulin-like protein 1	191	K.KPWTC#FPK.P	183.61	186.823	185.291	183.459	160.734	170.56	155.936	160.989	165.81	166.722	165.059	160.216	157.817	152.282	154.881	185.241	171.584	160.912	163.999	154.993	1.07959	1.1512	1.12953	1.19516	CGNL1_C191	0.867676	6.64228	3.06834	2.06086	1.78664
sp|P10768|ESTD_HUMAN	ESD	ESTD_HUMAN S-formylglutathione hydrolase	56	K.C#PALYWLSGLTC#TEQNFISK.S	85.6683	131.663	162.567	168.796	126.948	126.07	108.411	247.552	101.29	134.831	168.719	113.548	111.053	91.6577	115.165	126.633	140.605	152.418	139.033	105.958	0.900631	0.830828	0.910812	1.19512	ESD_C56	30.5572	17.3666	54.105	20.0128	11.8484
sp|O95081|AGFG2_HUMAN	AGFG2	AGFG2_HUMAN Arf-GAP domain and FG repeat-containing protein 2	39	R.ELGGC#SQAGNR.H	43.9133	41.5997	42.147	48.7659	47.2386	43.2954	40.8575	50.9947	45.96	45.9528	47.3975	47.4319	42.1518	33.0251	31.6415	42.5533	46.4333	45.9374	46.9274	35.6061	0.91644	0.926333	0.906791	1.19511	AGFG2_C39	2.84146	6.07915	11.0338	1.79892	16.0387
sp|Q9BT17|MTG1_HUMAN	MTG1	MTG1_HUMAN Mitochondrial ribosome-associated GTPase 1	23	R.ENFPLC#GR.D	481.471	432.906	415.373	416.766	431.178	433.323	393.988	426.757	402.37	407.682	395.892	400.664	392.103	362.207	358.426	443.25	427.089	407.705	401.413	370.912	1.03784	1.08718	1.10423	1.19503	MTG1_C23	7.7251	2.10824	4.17536	1.47748	4.97397
sp|P07384|CAN1_HUMAN	CAPN1	CAN1_HUMAN Calpain-1 catalytic subunit	49	R.C#LQSGTLFR.D	26.2383	34.4499	30.9993	29.6004	28.5115	38.8145	32.805	29.1148	29.69	24.3803	23.558	30.8412	28.6572	24.4314	23.6401	30.5625	32.3088	30.5366	26.2598	25.5762	0.945951	1.00085	1.16385	1.19496	CAPN1_C49	13.491	17.5195	6.50186	15.1898	10.5464
sp|P04183|KITH_HUMAN	TK1	KITH_HUMAN Thymidine kinase, cytosolic	153	K.LTAVC#MEC#FR.E	40.6583	43.3276	52.0728	39.1504	35.7823	44.1448	38.7806	34.0976	46.26	31.4171	40.8714	46.9515	43.6049	35.2972	34.9805	45.3529	39.6925	39.7127	39.7466	37.9609	1.14261	1.14202	1.14105	1.19473	TK1_C153	13.165	10.6004	15.4473	19.6949	12.8828
sp|Q9H7X7|RABL5_HUMAN	RABL5	RABL5_HUMAN Rab-like protein 5	64	K.GTGCEFELWDC#GGDAK.F	26.1916	8.09115	8.43948	13.7895	11.3701	9.76209	11.8662	11.7509	9.83	13.438	5.14411	6.95897	8.09931	19.3794	8.28071	14.2408	11.6406	11.149	8.51371	11.9198	1.22337	1.27731	1.67269	1.19472	RABL5_C64	72.6874	17.4157	10.2589	51.2124	54.2024
sp|O43396|TXNL1_HUMAN	TXNL1	TXNL1_HUMAN Thioredoxin-like protein 1	34;37	R.GC#GPC#LR.I	85.2998	104.769	88.0216	91.9949	85.3511	93.9903	101.684	97.7628	98.0178	89.1245	92.2662	99.7746	81.7605	80.1404	70.8844	92.6967	90.4454	99.1548	93.7218	77.5951	1.02489	0.934869	0.989063	1.19462	TXNL1_C34;37	11.3735	5.00106	2.21257	5.83879	7.56211
sp|Q9UG63|ABCF2_HUMAN	ABCF2	ABCF2_HUMAN ATP-binding cassette sub-family F member 2	411	K.DGPC#IYNNLEFGIDLDTR.V	112.07	121.915	128.381	100.121	97.7351	105.832	98.0993	111.208	121.79	116.806	132.403	90.1341	103.901	102.657	96.8065	120.789	101.229	110.366	113.114	101.122	1.19322	1.09444	1.06785	1.19449	ABCF2_C411	6.79998	4.11002	10.7531	18.8968	3.74636
sp|Q13769|THOC5_HUMAN	THOC5	THOC5_HUMAN THO complex subunit 5 homolog	613	K.ELC#GPWPSHQLLTNQLQR.L	71.785	76.8004	71.1813	70.8378	69.256	73.5419	51.3634	67.5067	67.86	60.6156	61.0127	67.5328	61.623	58.2851	64.1087	73.2555	71.2119	62.2434	63.0537	61.3389	1.0287	1.17692	1.1618	1.19427	THOC5_C613	4.21089	3.04343	15.1406	6.15996	4.76398
sp|Q03001|DYST_HUMAN	DST	DYST_HUMAN Dystonin	3225	R.DDPFC#IGNLK.S	95.9233	93.1138	91.4487	101.651	98.9649	101.733	86.6097	94.1943	93.31	80.9634	83.2783	79.6279	83.5708	75.0583	76.2383	93.4952	100.783	91.3713	81.2898	78.2891	0.92769	1.02324	1.15015	1.19423	DST_C3225	2.41891	1.56269	4.53901	2.27208	5.89091
sp|O60343|TBCD4_HUMAN	TBC1D4	TBCD4_HUMAN TBC1 domain family member 4	45	R.LWYVGGSC#LDHR.T	42.525	42.4458	33.6697	41.445	38.1447	29.9633	29.2221	29.5116	31.66	32.1912	40.5131	34.4869	35.9984	31.0738	32.285	39.5468	36.5177	30.1312	35.7304	33.1191	1.08295	1.31249	1.10681	1.19408	TBC1D4_C45	12.8705	16.1873	4.42014	12.029	7.7479
sp|P29279|CTGF_HUMAN	CTGF	CTGF_HUMAN Connective tissue growth factor	161	K.C#C#EEWVC#DEPK.D	26.81	32.1739	37.4234	26.9671	30.8308	30.7758	26.8416	32.6389	26.97	27.9853	30.8647	32.7133	30.5019	21.5712	28.6789	32.1358	29.5246	28.8168	30.5211	26.9174	1.08844	1.11517	1.0529	1.19387	CTGF_C161	16.5137	7.50223	11.4886	7.80655	17.5306
sp|Q17RS7|GEN_HUMAN	GEN1	GEN_HUMAN Flap endonuclease GEN homolog 1	246	R.WNETSC#NSSPQLLVTK.K	43.8433	35.8561	34.6019	37.2819	41.6399	34.0257	38.0398	31.1453	35.83	41.2154	40.3467	34.7702	30.8052	31.9826	32.965	38.1004	37.6492	35.005	38.7774	31.9176	1.01198	1.08843	0.98254	1.19371	GEN1_C246	13.157	10.1472	10.0571	9.01923	3.38798
sp|O60292|SI1L3_HUMAN	SIPA1L3	SI1L3_HUMAN Signal-induced proliferation-associated 1-like protein 3	757;762	R.VHNPC#TDNVC#YSMAVTR.S	74.3808	82.5804	79.1395	74.4312	76.5038	70.3273	73.1566	65.5372	72.6805	67.9573	76.3559	68.0086	70.8214	58.543	68.5073	78.7002	73.7541	70.4581	70.7739	65.9572	1.06706	1.11698	1.11199	1.1932	SIPA1L3_C757;762	5.23175	4.26204	6.05783	6.83049	9.89176
sp|P49796|RGS3_HUMAN	RGS3	RGS3_HUMAN Regulator of G-protein signaling 3	410	K.NC#THGVQAR.P	86.9866	105.793	91.4613	90.9539	91.4028	96.9684	59.513	100.472	108.85	87.7459	66.5151	78.544	82.004	75.085	81.1315	94.7468	93.1084	89.6118	77.6017	79.4068	1.0176	1.0573	1.22094	1.19318	RGS3_C410	10.3688	3.59842	29.4612	13.7197	4.74538
sp|Q9Y483|MTF2_HUMAN	MTF2	MTF2_HUMAN Metal-response element-binding transcription factor 2	437	K.ESISENPTLDLPC#SIGR.T	30.6716	27.3478	24.147	21.3836	30.1943	33.4595	20.5866	27.6212	27.53	25.9171	26.0533	36.3221	24.6896	20.6223	23.5551	27.3888	28.3458	25.2459	29.4308	22.9557	0.96624	1.08488	0.930617	1.19312	MTF2_C437	11.9119	22.0371	15.984	20.2796	9.14315
sp|Q8IZT6|ASPM_HUMAN	ASPM	ASPM_HUMAN Abnormal spindle-like microcephaly-associated protein	231;236	K.IPISPISPAFNEC#HGATC#LPLSVR.R	77.596	69.0372	66.1636	60.57	58.4204	74.805	78.1062	57.3348	62.9178	73.524	78.0076	66.6643	65.6556	57.3665	55.3337	70.9323	64.5985	66.1196	72.7319	59.4519	1.09805	1.07279	0.975257	1.1931	ASPM_C231;236	8.38427	13.784	16.2576	7.85484	9.19704
sp|P98164|LRP2_HUMAN	LRP2	LRP2_HUMAN Low-density lipoprotein receptor-related protein 2	53;67	K.DC#SDDADEIGCAVVTC#QQGYFK.C	14.7026	11.975	16.4558	14.6111	13.0803	11.6167	12.0446	19.6586	16.0326	13.5473	15.0483	13.8605	12.4197	8.9096	14.8285	14.3778	13.1027	15.9119	14.1521	12.0526	1.09732	0.903585	1.01595	1.19292	LRP2_C53;67	15.7046	11.4278	23.9343	5.59511	24.6958
tr|E7ESL9|E7ESL9_HUMAN	AGAP3	E7ESL9_HUMAN Arf-GAP with GTPase, ANK repeat and PH domain-containing protein 3	61	R.SVC#SGGPEPPPTGAR.G	37.5083	41.2184	45.6739	33.3374	40.3562	42.8646	41.2097	43.2696	43.45	43.4108	42.8676	35.4477	36.529	31.7821	35.9761	41.4669	38.8527	42.6431	40.5753	34.7624	1.06728	0.972417	1.02197	1.19286	AGAP3_C61	9.85964	12.7104	2.91869	10.9648	7.46719
sp|P16860|ANFB_HUMAN	NPPB	ANFB_HUMAN Natriuretic peptides B	112	K.MVQGSGC#FGR.K	334.016	342.7	302.032	328.774	306.485	314.467	278.594	299.737	324.72	311.34	273.687	283.483	292.397	246.505	281.775	326.25	316.575	301.017	289.503	273.559	1.03056	1.08383	1.12693	1.19261	NPPB_C112	6.56473	3.56721	7.67057	6.74775	8.78181
sp|O43353|RIPK2_HUMAN	RIPK2	RIPK2_HUMAN Receptor-interacting serine/threonine-protein kinase 2	407	R.AAFC#DHK.T	54.6	60.6062	51.2163	50.6016	46.4835	46.6931	47.8533	50.2362	44.76	46.9465	44.851	47.8876	45.2728	45.3611	48.9193	55.4741	47.926	47.6165	46.5617	46.5177	1.15749	1.16502	1.19141	1.19254	RIPK2_C407	8.57262	4.83961	5.76641	3.33842	4.47208
sp|P16298-4|PP2BB_HUMAN	PPP3CB	PP2BB_HUMAN Isoform 4 of Serine/threonine-protein phosphatase 2B catalytic subunit beta isoform	478	R.IC#SFEEAK.G	180.168	118.841	123.708	131.361	118.782	120.543	118.407	105.852	111.67	132.717	110.342	121.702	125.988	127.342	101.141	140.906	123.562	111.976	121.587	118.157	1.14037	1.25835	1.15889	1.19253	PPP3CB_C478	24.1931	5.51254	5.61098	9.20124	12.4849
sp|Q9Y5P8|P2R3B_HUMAN	PPP2R3B	P2R3B_HUMAN Serine/threonine-protein phosphatase 2A regulatory subunit B'' subunit beta	35	R.MLQDC#LR.R	17.99	18.7562	20.0154	17.734	10.8307	19.3026	15.1697	15.3101	14.46	12.5021	19.0665	15.6669	12.825	16.7598	18.0184	18.9205	15.9558	14.9799	15.7452	15.8677	1.18581	1.26306	1.20167	1.19239	PPP2R3B_C35	5.40505	28.2481	3.04218	20.8501	17.0737
sp|P57727-6|TMPS3_HUMAN	TMPRSS3	TMPS3_HUMAN Isoform 6 of Transmembrane protease serine 3	213	K.TMC#SDDWK.G	100.532	99.0838	92.3808	83.5456	88.3607	93.4969	79.0673	87.4145	84.79	86.81	93.3234	91.7106	75.7368	87.6615	81.4957	97.3321	88.4677	83.7573	90.6147	81.6314	1.1002	1.16207	1.07413	1.19234	TMPRSS3_C213	4.46781	5.62525	5.09608	3.74352	7.30543
sp|P54687|BCAT1_HUMAN	BCAT1	BCAT1_HUMAN Branched-chain-amino-acid aminotransferase, cytosolic	4;8	K.DC#SNGC#SAECTGEGGSK.E	47.7309	59.4415	67.7176	53.5181	64.2507	59.2141	44.9535	52.0027	57.1651	59.1946	62.3211	63.3304	52.0612	44.5861	50.0345	58.2967	58.9943	51.3738	61.6154	48.8939	0.988175	1.13476	0.946138	1.19231	BCAT1_C4;8	17.2264	9.10202	11.9322	3.49972	7.90669
sp|Q03164-3|KMT2A_HUMAN	KMT2A	KMT2A_HUMAN Isoform 3 of Histone-lysine N-methyltransferase 2A	1575	K.C#YDDDDYESK.M	15.4233	11.4039	12.3695	13.2759	8.7487	12.4211	12.1941	13.1046	13.86	12.8141	13.2698	14.2012	13.4441	9.60949	9.82271	13.0656	11.4819	13.0529	13.4284	10.9588	1.13793	1.00097	0.972983	1.19225	KMT2A_C1575	16.0589	20.9488	6.39056	5.26526	19.6646
sp|Q7Z4Q2|HEAT3_HUMAN	HEATR3	HEAT3_HUMAN HEAT repeat-containing protein 3	446	K.TAFPNSIAVDLC#SR.N	46.3516	54.0165	52.4633	48.2305	42.7402	44.8958	53.003	54.087	58.09	42.2207	53.5653	39.0688	44.4136	40.4828	43.2976	50.9438	45.2888	55.06	44.9516	42.7313	1.12486	0.925241	1.1333	1.19219	HEATR3_C446	7.95395	6.10778	4.86638	16.9612	4.74041
sp|O43502|RA51C_HUMAN	RAD51C	RA51C_HUMAN DNA repair protein RAD51 homolog 3	124	K.TTEIC#GAPGVGK.T	47.7516	49.5121	41.0889	36.0909	43.2041	40.7964	38.8899	45.1017	38.78	40.3372	45.2989	42.7638	42.6446	38.3043	35.1019	46.1176	40.0305	40.9239	42.8	38.6836	1.15206	1.12691	1.07751	1.19217	RAD51C_C124	9.63407	9.03793	8.84208	5.79677	9.78608
sp|Q14135-4|VGLL4_HUMAN	VGLL4	VGLL4_HUMAN Isoform 4 of Transcription cofactor vestigial-like protein 4	99	K.TANGDC#R.R	249.001	210.418	147.981	213.202	221.9	207.491	200.024	209.965	190.27	215.459	180.415	186.796	198.781	131.218	179.504	202.467	214.197	200.087	194.223	169.834	0.945234	1.01189	1.04244	1.19214	VGLL4_C99	25.1783	3.38752	4.92172	9.61034	20.4927
sp|Q9UK53|ING1_HUMAN	ING1	ING1_HUMAN Inhibitor of growth protein 1	216	R.MLHC#VQR.A	187.682	187.955	168.223	176.772	176.635	173.317	157.867	158.224	182.92	163.105	164.356	168.062	147.986	143.848	164.388	181.287	175.575	166.337	165.174	152.074	1.03253	1.08988	1.09755	1.19209	ING1_C216	6.24119	1.11432	8.63453	1.56073	7.14311
sp|P29353|SHC1_HUMAN	SHC1	SHC1_HUMAN SHC-transforming protein 1	416	K.QM*PPPPPC#PGR.E	16.8117	17.3739	15.3674	12.7515	10.8523	13.566	14.0767	10.3506	12.58	13.8425	12.1181	14.3737	14.9856	11.4806	15.1044	16.5177	12.3899	12.3358	13.4447	13.8569	1.33316	1.33901	1.22856	1.19202	SHC1_C416	6.2664	11.2391	15.1995	8.7708	14.8574
sp|Q9ULD2|MTUS1_HUMAN	MTUS1	MTUS1_HUMAN Microtubule-associated tumor suppressor 1	103;105	K.DSIC#QC#PALVGTEK.P	108.323	103.271	98.5805	102.749	100.985	100.046	87.7539	88.6258	91.7561	102.701	92.5593	100.655	84.444	88.5194	87.2775	103.392	101.26	89.3786	98.6385	86.7469	1.02105	1.15678	1.04819	1.19188	MTUS1_C103;105	4.71253	1.35491	2.35472	5.43726	2.40801
sp|A6NHR9|SMHD1_HUMAN	SMCHD1	SMHD1_HUMAN Structural maintenance of chromosomes flexible hinge domain-containing protein 1	1899	K.QC#LILGEQIDLLQQYR.S	135.812	149.513	144.491	135.579	139.634	130.76	104.294	136.099	141.17	141.29	137.637	115.765	122.475	112.48	125.68	143.272	135.324	127.187	131.564	120.212	1.05873	1.12647	1.08899	1.19183	SMCHD1_C1899	4.83824	3.2827	15.7155	10.4919	5.72705
sp|Q14191|WRN_HUMAN	WRN	WRN_HUMAN Werner syndrome ATP-dependent helicase	15	K.C#PEWMNVQNK.R	20.5217	21.4731	18.2393	18.0618	21.0896	18.8963	14.1252	20.0011	17.43	19.0074	18.6698	19.1033	19.0542	13.3918	18.1034	20.078	19.3493	17.1855	18.9268	16.8498	1.03766	1.16832	1.06082	1.19159	WRN_C15	8.27722	8.08242	17.1399	1.20308	17.9956
sp|Q9UJC3|HOOK1_HUMAN	HOOK1	HOOK1_HUMAN Protein Hook homolog 1	692;698	R.LVSGGGAC#SDTGAC#TPAR.S	97.8135	91.3056	102.991	79.4902	94.2232	84.8798	81.0001	94.2007	86.983	86.0833	81.043	77.9989	88.9678	72.4351	83.7716	97.37	86.1977	87.3946	81.7084	81.7248	1.12961	1.11414	1.19168	1.19144	HOOK1_C692;698	6.01338	8.648	7.5633	4.99715	10.3448
sp|Q05209|PTN12_HUMAN	PTPN12	PTN12_HUMAN Tyrosine-protein phosphatase non-receptor type 12	495;498	K.ISKPQELSSDLNVGDTSQNSC#VDC#SVTQSNK.V	52.0382	67.0859	50.4059	50.3507	55.467	65.7748	59.8945	56.7282	58.899	63.9605	55.5003	60.9896	56.3514	42.791	43.1526	56.51	57.1975	58.5072	60.1501	47.4317	0.98798	0.965863	0.939483	1.1914	PTPN12_C495;498	16.2719	13.7354	2.76729	7.13564	16.2903
sp|Q96GN5|CDA7L_HUMAN	CDCA7L	CDA7L_HUMAN Cell division cycle-associated 7-like protein	422	R.C#ATGILIHLAK.F	477.598	503.57	483.746	477.595	491.275	467.091	417.927	454.915	482.87	452.699	456.943	442.467	418.637	400.378	410.648	488.305	478.654	451.904	450.703	409.887	1.02016	1.08055	1.08343	1.19131	CDCA7L_C422	2.77957	2.53357	7.20859	1.65104	2.23319
sp|Q92793|CBP_HUMAN	CREBBP	CBP_HUMAN CREB-binding protein	1213	K.YEFSPQTLCC#YGK.Q	119.525	121.832	118.795	124.051	111.953	115.939	93.7755	122.341	128.83	113.571	101.577	105.555	101.286	103.472	97.5958	120.051	117.314	114.982	106.901	100.785	1.02333	1.04408	1.12301	1.19116	CREBBP_C1213	1.32047	5.25518	16.2198	5.71468	2.94706
sp|Q9H3Y8|PPDPF_HUMAN	PPDPF	PPDPF_HUMAN Pancreatic progenitor cell differentiation and proliferation factor	30;35	R.LGSTSSNSSC#SSTEC#PGEAIPHPPGLPK.A	69.7899	68.2493	59.82	83.17	60.4774	64.1821	59.6485	67.3068	64.3903	57.7771	58.9103	59.0845	52.2176	54.2915	59.6063	65.9531	69.2765	63.7819	58.5906	55.3718	0.952027	1.03404	1.12566	1.1911	PPDPF_C30;35	8.13753	17.5729	6.06009	1.21159	6.88245
sp|Q5T3J3|LRIF1_HUMAN	LRIF1	LRIF1_HUMAN Ligand-dependent nuclear receptor-interacting factor 1	23;27	R.C#VSGC#MYQVVQTIGSDGK.N	353.196	387.585	347.929	388.778	367.94	381.617	330.274	331.594	357.881	351.976	364.898	306.818	312.572	298.743	302.74	362.904	379.445	339.916	341.231	304.685	0.956407	1.06763	1.06351	1.19108	LRIF1_C23;27	5.93454	2.79018	4.58109	8.93675	2.3357
sp|Q9UPZ3|HPS5_HUMAN	HPS5	HPS5_HUMAN Hermansky-Pudlak syndrome 5 protein	222	R.DGEYGAC#FFPGR.C	64.225	62.2744	54.0882	51.5085	56.8503	60.9115	53.4889	56.3509	53.15	55.0001	44.7486	51.2008	57.7187	43.7305	50.1699	60.1959	56.4234	54.3299	50.3165	50.5397	1.06686	1.10797	1.19634	1.19106	HPS5_C222	8.93506	8.35826	3.23651	10.3	13.8533
sp|P00390|GSHR_HUMAN	GSR	GSHR_HUMAN Glutathione reductase, mitochondrial	102;107	K.LGGTC#VNVGC#VPK.K	139.45	155.57	144.972	127.429	127.133	132.402	125.223	128.213	142.482	131.956	125.616	121.074	125.845	113.882	129.82	146.664	128.988	131.973	126.215	123.183	1.13704	1.11132	1.16202	1.19062	GSR_C102;107	5.58564	2.29525	6.98888	4.33048	6.73444
sp|Q5VIY5|ZN468_HUMAN	ZNF468	ZN468_HUMAN Zinc finger protein 468	217	K.SFEC#IQSFK.S	61.2733	61.4165	55.1463	52.5465	56.4188	52.9836	55.5779	54.0054	54.93	55.6125	51.2492	61.9533	46.3847	51.6827	51.3355	59.2787	53.983	54.8377	56.2717	49.801	1.0981	1.08098	1.05344	1.19031	ZNF468_C217	6.03836	3.92863	1.44118	9.5651	5.95107
sp|Q63HN8-4|RN213_HUMAN	RNF213	RN213_HUMAN Isoform 2 of E3 ubiquitin-protein ligase RNF213	62;78	K.EEGGPC#LFPGSDSWQENPEEPC#SK.A	100.671	87.0689	76.435	100.391	83.8469	93.2656	84.094	93.1547	78.6108	90.8856	81.0184	78.8096	77.2951	64.1144	80.5411	88.0584	92.5011	85.2865	83.5712	73.9835	0.951971	1.0325	1.05369	1.19024	RNF213_C62;78	13.7958	8.97116	8.61204	7.694	11.7589
sp|Q49B96|COX19_HUMAN	COX19	COX19_HUMAN Cytochrome c oxidase assembly protein COX19	40;51	K.C#LHNNNFENALC#R.K	669.595	720.687	618.469	700.194	715.976	688.771	550.164	641.05	692.899	649.582	530.246	584.326	578.391	499.431	609.984	669.584	701.647	628.038	588.051	562.602	0.954303	1.06615	1.13865	1.19016	COX19_C40;51	7.63295	1.94698	11.5044	10.1616	10.1213
sp|Q8IUC4|RHPN2_HUMAN	RHPN2	RHPN2_HUMAN Rhophilin-2	444	K.VLC#AAQER.S	86.2516	83.8786	78.1596	69.4173	93.5927	78.6384	69.2173	83.6453	79.81	71.685	72.9261	68.8261	61.8252	76.1809	70.6167	82.7633	80.5495	77.5575	71.1457	69.5409	1.02748	1.06712	1.16329	1.19014	RHPN2_C444	5.02601	15.1465	9.63554	2.95524	10.4084
sp|Q15276|RABE1_HUMAN	RABEP1	RABE1_HUMAN Rab GTPase-binding effector protein 1	533	R.C#DM*C#SNYEK.Q	49.1516	46.4854	46.2282	37.8282	40.2483	38.0881	40.5296	44.5649	37.76	31.6828	40.7306	40.9902	36.4027	42.8083	40.0558	47.2884	38.7216	40.9515	37.8012	39.7556	1.22124	1.15474	1.25098	1.18948	RABEP1_C533	3.42309	3.43109	8.35629	14.0214	8.08277
sp|Q7Z5J4|RAI1_HUMAN	RAI1	RAI1_HUMAN Retinoic acid-induced protein 1	40	R.QPSQAGLSC#DR.Q	30.24	29.2544	32.9769	27.3386	30.6043	25.5316	24.4732	24.7738	29.09	27.7196	24.876	29.3262	29.2005	21.1035	27.4526	30.8238	27.8248	26.1124	27.3073	25.9188	1.10778	1.18043	1.12878	1.18924	RAI1_C40	6.25716	9.24007	9.89223	8.25267	16.4392
sp|Q86TB3|ALPK2_HUMAN	ALPK2	ALPK2_HUMAN Alpha-protein kinase 2	713;715	K.PC#TC#GPQHEEK.Q	144.858	155.386	138.106	157.756	145.51	150.634	131.831	134.72	148.889	124.826	122.262	130.315	126.008	104.461	138.168	146.117	151.3	138.48	125.801	122.879	0.965744	1.05515	1.16149	1.18911	ALPK2_C713;715	5.96014	4.0649	6.59246	3.27041	13.8915
sp|Q13464|ROCK1_HUMAN	ROCK1	ROCK1_HUMAN Rho-associated protein kinase 1	1300	R.DMLLLAC#SQDEQK.K	87.7799	98.7263	93.9679	92.7896	89.4179	86.4431	72.3873	83.5053	89.22	78.6293	72.5934	83.6062	78.5671	72.8396	84.4705	93.4914	89.5502	81.7042	78.2763	78.6258	1.04401	1.14427	1.19438	1.18907	ROCK1_C1300	5.87084	3.54583	10.4764	7.04541	7.39661
sp|Q9ULI0|ATD2B_HUMAN	ATAD2B	ATD2B_HUMAN ATPase family AAA domain-containing protein 2B	360	R.C#LPMNFR.A	70.5716	66.6715	73.3605	63.1891	54.4124	63.0042	62.8288	58.428	54.96	57.4959	64.5317	63.7146	55.2674	61.3858	60.4661	70.2012	60.2019	58.7389	61.9141	59.0398	1.1661	1.19514	1.13385	1.18905	ATAD2B_C360	4.78597	8.32989	6.71374	6.21509	5.58806
sp|Q9UIF8|BAZ2B_HUMAN	BAZ2B	BAZ2B_HUMAN Bromodomain adjacent to zinc finger domain protein 2B	212	K.C#NQEQSK.N	32.3283	33.2941	38.683	36.5607	33.5924	32.4008	23.2344	32.5106	35.24	30.6198	28.4462	27.0353	26.547	29.0824	32.1029	34.7685	34.1846	30.3283	28.7004	29.2441	1.01708	1.1464	1.21143	1.1889	BAZ2B_C212	9.84895	6.26682	20.7505	6.29162	9.51118
sp|Q66K74|MAP1S_HUMAN	MAP1S	MAP1S_HUMAN Microtubule-associated protein 1S	588;598	R.C#GEASPPSAAC#GSPASQLVATPSLELGPIPAGEEK.A	189.142	194.151	141.967	172.071	180.679	178.884	150.003	209.639	173.343	195.989	151.111	146.325	172.403	110.149	159.332	175.087	177.211	177.662	164.475	147.295	0.988011	0.985506	1.06452	1.18868	MAP1S_C588;598	16.4443	2.56249	16.9149	16.6571	22.2861
sp|P22105|TENX_HUMAN	TNXB	TENX_HUMAN Tenascin-X	719;723	R.GPDCAIQTC#PGDC#R.G	95.6852	136.546	118.949	112.08	101.026	116.852	98.9561	112.879	125.799	105.889	92.768	90.5062	83.8548	111.789	99.8288	117.06	109.986	112.545	96.3877	98.491	1.06432	1.04012	1.21447	1.18854	TNXB_C719;723	17.5087	7.38136	11.9282	8.61693	14.23
sp|O43149|ZZEF1_HUMAN	ZZEF1	ZZEF1_HUMAN Zinc finger ZZ-type and EF-hand domain-containing protein 1	728	K.DTEESVC#GATLLLR.T	57.3183	61.1901	50.1582	49.039	40.874	58.0063	58.7357	48.2174	52.43	61.8866	47.5126	54.6988	54.4461	44.4121	43.0548	56.2222	49.3064	53.1277	54.6993	47.3043	1.14026	1.05825	1.02784	1.18852	ZZEF1_C728	9.95517	17.3796	9.9642	13.1391	13.1532
sp|P03915|NU5M_HUMAN	MT-ND5	NU5M_HUMAN NADH-ubiquinone oxidoreductase chain 5	518	K.SPLC#TFYFSNMLGFYPSITHR.T	64.47	75.0725	62.1498	71.7994	71.0791	66.722	68.4521	53.4919	72.85	71.2343	138.328	68.6413	56.5183	51.95	61.2554	67.2308	69.8668	64.9313	92.7345	56.5746	0.96227	1.03541	0.724981	1.18836	MT-ND5_C518	10.2476	3.93209	15.6287	42.6015	8.2244
sp|Q9C0K1|S39A8_HUMAN	SLC39A8	S39A8_HUMAN Zinc transporter ZIP8	289;291	K.KEPSSC#TC#LK.G	75.2173	72.0276	74.0364	77.8935	60.0613	72.2976	70.2105	65.0221	63.3562	72.8287	69.4687	71.3933	63.7951	59.4113	63.011	73.7604	70.0841	66.1963	71.2303	62.0725	1.05246	1.11427	1.03552	1.1883	SLC39A8_C289;291	2.18628	13.0127	5.40034	2.36685	3.76613
sp|Q8N7W2|BEND7_HUMAN	BEND7	BEND7_HUMAN BEN domain-containing protein 7	317	K.LVC#AFFDDK.T	43.9133	39.3833	44.5529	42.8108	51.7263	39.8485	41.8049	38.2869	46.33	40.7301	51.7098	40.633	45.2349	29.0289	33.3414	42.6165	44.7952	42.1406	44.3576	35.8684	0.951363	1.01129	0.960747	1.18813	BEND7_C317	6.61303	13.8017	9.56813	14.3546	23.4002
sp|Q8NFF5|FAD1_HUMAN	FLAD1	FAD1_HUMAN FAD synthase	496;499	R.TDPYSC#SLC#PFSPTDPGWPAFMR.I	96.4752	93.7296	91.4329	104.9	94.0099	113.317	66.8947	91.7295	101.143	88.5299	93.8653	79.8004	85.5869	66.9882	84.5039	93.8793	104.076	86.5892	87.3985	79.0263	0.902027	1.08419	1.07415	1.18795	FLAD1_C496;499	2.68906	9.30106	20.4339	8.12413	13.21
sp|Q6SPF0|SAMD1_HUMAN	SAMD1	SAMD1_HUMAN Atherin	448	K.PALPGADGTPFGC#PPGR.K	34.51	39.9433	42.3485	40.3086	31.5212	38.8145	44.1247	40.6791	41.81	34.7679	28.6893	32.6517	32.511	34.7225	31.1073	38.934	36.8814	42.2046	32.0363	32.7802	1.05565	0.922506	1.21531	1.18773	SAMD1_C448	10.3138	12.7485	4.16154	9.63184	5.55996
sp|Q5JS54-2|PSMG4_HUMAN	PSMG4	PSMG4_HUMAN Isoform 2 of Proteasome assembly chaperone 4	55	R.NLAVAMC#SR.Y	129.757	116.696	114.638	126.444	124.121	141.458	98.1722	121.675	122.26	109.076	104.763	98.7681	112.051	83.1174	108.875	120.364	130.674	114.036	104.202	101.348	0.921096	1.05549	1.15509	1.18763	PSMG4_C55	6.81212	7.20167	12.0501	4.96789	15.6567
sp|A8MV65|VGLL3_HUMAN	VGLL3	VGLL3_HUMAN Transcription cofactor vestigial-like protein 3	277	R.IPAPQC#DITK.T	82.2033	72.1292	65.0092	73.5039	64.1427	73.5296	63.9826	65.2429	66.59	63.6314	69.228	67.9516	54.4335	72.4521	57.8192	73.1139	70.3921	65.2718	66.937	61.5683	1.03867	1.12014	1.09228	1.18753	VGLL3_C277	11.8162	7.68853	1.99773	4.38172	15.5542
sp|Q16635|TAZ_HUMAN	TAZ	TAZ_HUMAN Tafazzin	103	R.WTPAAADIC#FTK.E	171.722	155.758	152.074	147.543	145.707	143.649	138.92	137.802	141.15	141.221	168.361	145.412	132.685	136.738	134.434	159.851	145.633	139.291	151.664	134.619	1.09763	1.14761	1.05398	1.18743	TAZ_C103	6.5334	1.33768	1.22356	9.63347	1.51019
sp|Q96NE9|FRMD6_HUMAN	FRMD6	FRMD6_HUMAN FERM domain-containing protein 6	306	K.LIYYTGC#PMR.S	115.325	88.1685	91.3983	98.242	94.1105	95.4666	92.0873	73.6681	89.29	73.9266	77.9422	102.18	86.4769	82.9303	79.0067	98.2972	95.9397	85.0151	84.6829	82.8046	1.02457	1.15623	1.16077	1.1871	FRMD6_C306	15.0915	2.19511	11.6754	18.05	4.51268
sp|Q8WYA0|IFT81_HUMAN	IFT81	IFT81_HUMAN Intraflagellar transport protein 81 homolog	535	K.SQYDSC#AAGLESNR.S	9.37999	13.4654	11.8153	12.3362	10.9278	11.5717	11.2103	11.9143	13.01	13.4265	9.43087	14.9402	9.843	8.66057	10.6969	11.5535	11.6119	12.0449	12.5992	9.7335	0.994974	0.959209	0.917007	1.18699	IFT81_C535	17.7888	6.07217	7.52951	22.5913	10.5058
sp|Q13228|SBP1_HUMAN	SELENBP1	SBP1_HUMAN Selenium-binding protein 1	5;8	K.C#GNC#GPGYSTPLEAMK.G	167.077	179.592	164.23	159.546	159.639	167.179	149.52	164.243	164.929	168.973	140.529	140.275	139.669	137.456	153.295	170.3	162.121	159.564	149.926	143.473	1.05045	1.06728	1.13589	1.18698	SELENBP1_C5;8	4.79886	2.70198	5.45547	11.0029	5.97879
sp|Q5TFE4|NT5D1_HUMAN	NT5DC1	NT5D1_HUMAN 5'-nucleotidase domain-containing protein 1	119	K.HFLSDTGM*AC#R.S	836.523	894.185	847.941	832.462	891.428	899.959	780.362	792.355	876.7	802.447	741.43	751.273	695.998	730.388	746.126	859.55	874.616	816.472	765.05	724.17	0.982773	1.05276	1.12352	1.18694	NT5DC1_C119	3.5523	4.20243	6.43041	4.28183	3.54003
sp|P29279|CTGF_HUMAN	CTGF	CTGF_HUMAN Connective tissue growth factor	273	K.FELSGC#TSMK.T	65.0883	64.3836	69.1533	60.9273	68.3175	67.3252	67.2983	61.567	53.42	61.54	58.0824	72.0408	56.6699	55.171	55.5366	66.2084	65.5233	60.7618	63.8877	55.7925	1.01046	1.08964	1.03632	1.18669	CTGF_C273	3.88862	6.1216	11.4778	11.3783	1.40079
sp|O95633-2|FSTL3_HUMAN	FSTL3	FSTL3_HUMAN Isoform 2 of Follistatin-related protein 3	93;95;99	R.C#EC#APDC#SGLPAR.L	93.3246	107.009	86.9348	104.711	111.877	105.198	81.5548	103.619	107.098	93.0069	71.3139	86.9816	88.1	67.8055	86.1769	95.7561	107.262	97.4237	83.7675	80.6941	0.892731	0.982883	1.14312	1.18665	FSTL3_C93;95;99	10.71	3.73267	14.2189	13.3679	13.8836
sp|Q9NVN8|GNL3L_HUMAN	GNL3L	GNL3L_HUMAN Guanine nucleotide-binding protein-like 3-like protein	490	K.IGDLTGYC#TNPNR.H	86.1583	84.82	74.1918	82.5185	86.2787	72.04	80.0025	66.6315	77.75	78.0516	75.3062	72.5334	62.6844	72.2516	71.7095	81.7234	80.2791	74.7947	75.2971	68.8818	1.01799	1.09264	1.08535	1.18643	GNL3L_C490	8.0231	9.19142	9.57109	3.66427	7.80172
sp|Q9Y2K2|SIK3_HUMAN	SIK3	SIK3_HUMAN Serine/threonine-protein kinase SIK3	597	K.QLQQEC#EQLQK.M	45.5583	46.2947	47.5004	41.0626	35.5126	48.3673	41.2583	52.1033	33.02	40.6146	43.9425	46.2002	36.7818	39.0126	41.6828	46.4511	41.6475	42.1272	43.5857	39.1591	1.11534	1.10264	1.06574	1.18622	SIK3_C597	2.11071	15.4806	22.7199	6.44672	6.26623
sp|Q2VPK5|CTU2_HUMAN	CTU2	CTU2_HUMAN Cytoplasmic tRNA 2-thiolation protein 2	449	R.C#GQGAC#R.R	183.61	202.303	163.411	176.892	191.5	188.311	145.37	178.19	170.07	160.656	124.725	137.714	160.799	143.768	158.572	183.108	185.568	164.543	141.032	154.38	0.986743	1.11283	1.29835	1.18609	CTU2_C449	10.6225	4.13898	10.3886	12.9003	5.99623
sp|Q9H0C8|ILKAP_HUMAN	ILKAP	ILKAP_HUMAN Integrin-linked kinase-associated serine/threonine phosphatase 2C	301	R.C#GVTSVPDIR.R	89.9733	100.192	98.2128	90.9757	88.0695	88.0311	72.2901	86.3992	80.82	91.5705	85.0314	76.1176	84.7964	82.8367	75.522	96.126	89.0255	79.8364	84.2398	81.0517	1.07976	1.20404	1.1411	1.18598	ILKAP_C301	5.63798	1.89733	8.90045	9.208	6.03083
sp|Q7Z340|ZN551_HUMAN	ZNF551	ZN551_HUMAN Zinc finger protein 551	142	R.GFC#FSADLHQHQK.H	30.4383	28.0986	23.2652	22.9242	23.8189	25.4578	29.5379	20.888	25.39	29.3719	29.0092	20.4581	22.4911	23.9235	22.5837	27.2674	24.067	25.272	26.2797	22.9994	1.13298	1.07896	1.03758	1.18557	ZNF551_C142	13.4155	5.33866	17.1184	19.197	3.48526
sp|O15269|SPTC1_HUMAN	SPTLC1	SPTC1_HUMAN Serine palmitoyltransferase 1	192	R.AAC#FAIQK.G	113.4	91.3144	101.916	105.519	87.2065	90.8379	98.075	78.9776	86.07	80.1083	108.001	80.1329	94.1719	79.6826	84.8469	102.21	94.5212	87.7075	89.414	86.2338	1.08135	1.16535	1.14311	1.18527	SPTLC1_C192	10.8068	10.2581	11.0064	18.0023	8.51587
sp|Q6PJ69|TRI65_HUMAN	TRIM65	TRI65_HUMAN Tripartite motif-containing protein 65	284	R.LC#GLLLEEGSHPGAPAK.P	80.4883	78.0516	62.4647	70.9471	67.2819	76.681	63.7518	66.3748	63.61	73.8573	76.2147	62.8894	62.1284	57.8708	66.4642	73.6682	71.6367	64.5789	70.9871	62.1545	1.02836	1.14075	1.03777	1.18524	TRIM65_C284	13.274	6.61303	2.41089	10.0176	6.91306
sp|O00743-3|PPP6_HUMAN	PPP6C	PPP6_HUMAN Isoform 3 of Serine/threonine-protein phosphatase 6 catalytic subunit	299	K.LVTVWSAPNYC#YR.C	128.998	106.424	121.39	108	107.509	106.213	108.897	90.4251	118.05	110.67	152.161	101.675	109.461	94.6381	96.9523	118.937	107.241	105.791	121.502	100.35	1.10907	1.12427	0.978893	1.18522	PPP6C_C299	9.65641	0.860411	13.3017	22.1638	7.94639
sp|P02769|ALBU_BOVIN_contaminant	ALB	ALBU_BOVIN_contaminant Serum albumin	510	R.RPC#FSALTPDETYVPK.A	175.07	233.333	239.82	180.05	179.85	186.477	158.475	180.839	174.96	162.1	170.229	175.822	166.459	198.672	181.848	216.074	182.126	171.424	169.384	182.326	1.1864	1.26046	1.27565	1.1851	ALB_C510	16.5029	2.06976	6.76309	4.07351	8.8367
sp|Q9NR09|BIRC6_HUMAN	BIRC6	BIRC6_HUMAN Baculoviral IAP repeat-containing protein 6	2892	R.AC#FGGLFANLIR.P	69.9416	64.8722	74.6705	81.0652	76.8828	79.1185	67.6748	68.4869	71.12	68.5999	89.1774	68.6167	62.6591	46.0961	68.0305	69.8281	79.0222	69.0939	75.4647	58.9286	0.883652	1.01063	0.925309	1.18496	BIRC6_C2892	7.01742	2.64846	2.60662	15.7366	19.4017
sp|Q7Z7A3|CTU1_HUMAN	CTU1	CTU1_HUMAN Cytoplasmic tRNA 2-thiolation protein 1	302	R.ALC#QAC#ALLDGLNR.G	91.8633	114.11	94.9252	91.5767	111.349	104.367	78.7637	100.379	111.68	86.3709	101.449	82.4361	81.8776	84.2935	87.7731	100.3	102.431	96.9409	90.0854	84.6481	0.979193	1.03465	1.11338	1.1849	CTU1_C302	12.022	9.78935	17.2531	11.1405	3.50116
sp|Q4KMG0|CDON_HUMAN	CDON	CDON_HUMAN Cell adhesion molecule-related/down-regulated by oncogenes	1160;1168	K.VPVC#LTSAVPDC#GQLPEESVK.D	202.425	225.405	206.215	201.401	192.073	200.868	181.589	213.391	224.239	208.99	192.055	188.416	194.107	164.525	176.656	211.348	198.114	206.406	196.487	178.429	1.0668	1.02394	1.07564	1.18449	CDON_C1160;1168	5.82922	2.64413	10.739	5.58802	8.33421
sp|O60701|UGDH_HUMAN	UGDH	UGDH_HUMAN UDP-glucose 6-dehydrogenase	112	K.YIEAC#AR.R	34.4983	38.5849	43.0665	32.1136	32.5244	38.0881	32.2706	36.9099	34.61	44.4507	36.6486	37.2705	32.1951	29.4566	36.4254	38.7166	34.2421	34.5968	39.4566	32.6924	1.13067	1.11908	0.981244	1.18427	UGDH_C112	11.0692	9.74574	6.70481	10.9897	10.7392
sp|O75095|MEGF6_HUMAN	MEGF6	MEGF6_HUMAN Multiple epidermal growth factor-like domains protein 6	139;147	R.C#VPGSAQPC#HCPPGFQGPR.C	18.999	20.5411	26.9557	24.343	25.764	22.334	22.004	17.0381	20.2439	21.1344	17.9234	21.8675	19.7913	19.8549	16.514	22.1653	24.147	19.762	20.3084	18.7201	0.91793	1.12161	1.09143	1.18404	MEGF6_C139;147	19.0372	7.13705	12.7405	10.3296	10.2071
sp|P35556|FBN2_HUMAN	FBN2	FBN2_HUMAN Fibrillin-2	110;115	K.TLPGGNQC#IVPIC#R.N	97.8866	104.751	87.5235	104.368	101.558	100.943	93.053	95.3227	108.283	102.595	94.8885	78.2698	90.4632	74.4193	80.2542	96.7204	102.29	98.8863	91.9178	81.7122	0.945552	0.978098	1.05225	1.18367	FBN2_C110;115	8.96685	1.78494	8.30922	13.5249	9.9382
sp|Q9BYW2|SETD2_HUMAN	SETD2	SETD2_HUMAN Histone-lysine N-methyltransferase SETD2	575	K.NSFC#C#TELNEEIK.Q	13.65	17.4812	13.6543	14.7729	13.9159	13.0982	15.8378	14.4932	17.22	14.5473	17.4797	22.3672	12.7239	14.5145	10.5998	14.9285	13.929	15.8503	18.1314	12.6127	1.07176	0.941841	0.823349	1.18361	SETD2_C575	14.8085	6.01217	8.6019	21.7881	15.5375
sp|Q8N3F8|MILK1_HUMAN	MICALL1	MILK1_HUMAN MICAL-like protein 1	597	K.PC#SGATPTPLLLVGDR.S	37.485	45.0554	49.2261	43.1605	34.7467	38.5067	42.4364	41.4259	40.6	42.0127	37.1604	47.555	34.6337	42.7816	33.912	43.9222	38.8046	41.4874	42.2427	37.1091	1.13188	1.05869	1.03976	1.18359	MICALL1_C597	13.5513	10.8616	2.21696	12.3124	13.2737
sp|P48509|CD151_HUMAN	CD151	CD151_HUMAN CD151 antigen	11	K.TTC#GTVC#LK.Y	78.9133	86.9173	84.5585	88.2878	72.9561	78.9954	62.9259	85.419	63.86	73.6262	75.8308	69.6513	68.0418	75.4859	68.0548	83.463	80.0798	70.735	73.0361	70.5275	1.04225	1.17994	1.14276	1.18341	CD151_C11	4.92784	9.64429	17.9901	4.28793	6.08859
sp|Q6P1R3|MSD2_HUMAN	MSANTD2	MSD2_HUMAN Myb/SANT-like DNA-binding domain-containing protein 2	99	R.SAASSSVSFSPGGGGGGAAAAAAAAC#R.G	23.8233	29.0519	25.6963	24.0169	24.5848	30.2342	22.7971	23.922	32.03	16.7427	24.1082	21.2095	23.5145	21.7717	21.1146	26.1905	26.2786	26.2497	20.6868	22.1336	0.996647	0.997744	1.26605	1.18329	MSANTD2_C99	10.1147	13.0804	19.1902	17.9365	5.6034
sp|O95967|FBLN4_HUMAN	EFEMP2	FBLN4_HUMAN EGF-containing fibulin-like extracellular matrix protein 2	162;168	K.IGPEC#VDIDEC#R.Y	57.0854	61.1046	56.6219	55.8553	59.2197	59.3891	58.897	54.2614	69.0808	63.8347	51.6435	54.1292	54.4483	43.4684	49.8212	58.2707	58.1547	60.7464	56.5358	49.2459	1.00199	0.959245	1.03069	1.18326	EFEMP2_C162;168	4.23059	3.42733	12.4794	11.3946	11.1938
sp|Q14146|URB2_HUMAN	URB2	URB2_HUMAN Unhealthy ribosome biogenesis protein 2 homolog	702	R.C#DAAFIIGSGR.K	111.37	121.749	123.053	119.691	108.749	137.359	82.4559	114.546	117.09	115.431	107.041	93.3488	98.8344	100.425	101.773	118.724	121.933	104.697	105.274	100.344	0.97368	1.13397	1.12776	1.18317	URB2_C702	5.39222	11.8392	18.4374	10.5883	1.46572
sp|P42575|CASP2_HUMAN	CASP2	CASP2_HUMAN Caspase-2	320	K.MFFIQAC#R.G	102.235	121.248	105.708	114.031	115.265	111.421	96.3139	107.672	119.19	105.378	94.8205	90.9716	96.7748	86.8596	94.5967	109.73	113.572	107.725	97.0568	92.7437	0.966171	1.01861	1.13058	1.18316	CASP2_C320	9.22697	1.72816	10.6178	7.68534	5.61855
sp|Q9P273|TEN3_HUMAN	TENM3	TEN3_HUMAN Teneurin-3	1989	K.TVNLQSDGFIC#TIR.Y	40.0516	43.8876	43.5326	35.6757	38.9862	39.0607	35.7443	42.3128	35.06	40.8803	36.1751	36.6424	35.3034	36.1392	36.304	42.4906	37.9075	37.7057	37.8993	35.9155	1.1209	1.1269	1.12115	1.18307	TENM3_C1989	4.98855	5.09971	10.6204	6.83973	1.49369
sp|Q86SX3|CN080_HUMAN	C14orf80	CN080_HUMAN Uncharacterized protein C14orf80	87	K.SALC#SQGYPR.L	76.8833	84.3791	74.2674	59.9876	70.1298	67.1036	68.2092	78.2774	75.46	73.0369	83.2911	72.8167	65.4895	65.7963	67.7998	78.5099	65.7403	73.9822	76.3816	66.3618	1.19424	1.0612	1.02787	1.18306	C14orf80_C87	6.68509	7.92013	7.02093	7.83545	1.89073
sp|Q92619-2|HMHA1_HUMAN	HMHA1	HMHA1_HUMAN Isoform 2 of Minor histocompatibility protein HA-1	294	R.C#EGGVDAALLYAK.N	26.7866	27.5266	14.8636	22.9352	23.6247	20.9522	19.3235	30.6902	19.89	22.7973	23.1741	27.2077	19.2438	20.4352	18.7955	23.0589	22.504	23.3012	24.393	19.4915	1.02466	0.989602	0.945308	1.18303	HMHA1_C294	30.8212	6.16536	27.489	10.0228	4.3478
sp|Q5D0E6|DALD3_HUMAN	DALRD3	DALD3_HUMAN DALR anticodon-binding domain-containing protein 3	468	R.TAVLDC#TAPGLHIAVR.T	42.8283	38.0963	34.7278	32.2556	40.1512	41.8551	30.0966	29.3365	33.99	28.7595	34.3325	31.7034	33.1933	34.121	30.4516	38.5508	38.0873	31.141	31.5984	32.5886	1.01217	1.23794	1.22002	1.18295	DALRD3_C468	10.5557	13.4474	8.01633	8.8231	5.85469
sp|P23921|RIR1_HUMAN	RRM1	RIR1_HUMAN Ribonucleoside-diphosphate reductase large subunit	779;787	R.NTAAMVC#SLENRDEC#LMCGS.-	120.306	115.678	109.926	118.243	127.368	123.246	107.611	113.108	118.842	128.939	117.621	114.125	94.514	100.721	97.2065	115.303	122.952	113.187	120.229	97.4806	0.93779	1.0187	0.959034	1.18283	RRM1_C779;787	4.50987	3.71654	4.96162	6.44067	3.19316
sp|Q8N1G0|ZN687_HUMAN	ZNF687	ZN687_HUMAN Zinc finger protein 687	281	K.VPVC#QPLK.E	58.1233	63.0847	61.1547	48.9516	53.4415	60.5914	52.8937	47.1322	53.7	55.8782	41.5624	45.375	58.262	45.8155	50.0971	60.7876	54.3282	51.242	47.6052	51.3915	1.1189	1.18629	1.27691	1.18283	ZNF687_C281	4.11436	10.8053	6.99027	15.5738	12.3044
sp|Q2TB90|HKDC1_HUMAN	HKDC1	HKDC1_HUMAN Putative hexokinase HKDC1	158	K.LPLGLTFSFPC#R.Q	59.36	51.2757	50.1708	60.7088	47.0445	47.9364	58.5778	42.2427	50.99	40.8688	85.8248	47.4195	44.5399	44.5191	46.8916	53.6022	51.8965	50.6035	58.0377	45.3169	1.03287	1.05926	0.923575	1.18283	HKDC1_C158	9.35953	14.7305	16.1538	41.8456	3.00952
sp|Q5JPI9|MET10_HUMAN	METTL10	MET10_HUMAN Methyltransferase-like protein 10	192	K.GFFLITSC#NWTK.E	179.597	167.781	192.634	212.951	153.593	171.655	163.539	151.164	176.16	159.858	369.032	159.896	147.822	160.341	148.397	180.004	179.4	163.621	229.596	152.187	1.00337	1.10013	0.784004	1.18278	METTL10_C192	6.90626	16.9605	7.63861	52.5949	4.64403
sp|Q86YT6|MIB1_HUMAN	MIB1	MIB1_HUMAN E3 ubiquitin-protein ligase MIB1	88	K.HDGTMCDTC#R.Q	113.038	149.192	140.599	117.834	126.074	136.448	89.3424	156.321	133.42	121.786	123.024	117.12	115.652	109.714	115.226	134.276	126.785	126.361	120.643	113.531	1.05909	1.06264	1.113	1.18273	MIB1_C88	14.0664	7.35685	26.9409	2.5805	2.91746
sp|P50542-4|PEX5_HUMAN	PEX5	PEX5_HUMAN Isoform 4 of Peroxisomal targeting signal 1 receptor	581	R.YNLGISC#INLGAHR.E	21.0117	23.4631	20.4437	20.8044	19.4284	19.1302	15.0483	24.6338	21.92	16.7427	20.8196	17.8839	17.8918	18.4705	18.5284	21.6395	19.7877	20.534	18.4821	18.2969	1.09358	1.05384	1.17084	1.18269	PEX5_C581	7.41539	4.51325	24.0614	11.3799	1.92402
sp|P49281-4|NRAM2_HUMAN	SLC11A2	NRAM2_HUMAN Isoform 4 of Natural resistance-associated macrophage protein 2	277	K.GMFVPSCSGC#R.T	161.7	164.302	168.915	154.209	154.38	171.421	142.649	141.408	156.72	151.169	132.237	129.671	125.331	144.73	148.421	164.972	160.003	146.926	137.692	139.494	1.03105	1.12283	1.19812	1.18265	SLC11A2_C277	2.21508	6.18018	5.78846	8.52748	8.89202
sp|P35556|FBN2_HUMAN	FBN2	FBN2_HUMAN Fibrillin-2	2336;2342	R.RPDGEGC#VDENEC#R.T	29.2932	34.7724	33.2584	37.5635	35.7364	24.1194	30.3144	36.3449	32.0732	31.587	30.7162	29.9714	29.5279	24.9615	27.8141	32.4414	32.4731	32.9108	30.7582	27.4345	0.999023	0.985734	1.05472	1.1825	FBN2_C2336;2342	8.72188	22.4554	9.42327	2.62902	8.40826
sp|O60566-3|BUB1B_HUMAN	BUB1B	BUB1B_HUMAN Isoform 3 of Mitotic checkpoint serine/threonine-protein kinase BUB1 beta	914	R.IHDPYDC#NK.N	25.235	34.4857	27.0945	22.2577	28.3604	24.0298	35.8536	25.614	25.35	26.4486	28.0879	32.3192	20.3304	28.7215	24.3686	28.9384	24.8826	28.9392	28.9519	24.4735	1.163	0.999972	0.999534	1.18244	BUB1B_C914	16.9092	12.6172	20.6967	10.4628	17.1473
sp|Q9HAZ2|PRD16_HUMAN	PRDM16	PRD16_HUMAN PR domain zinc finger protein 16	113	R.LGPC#VVVPR.A	20.2883	15.3482	13.8055	16.6741	15.5125	12.7289	15.6677	12.9412	12.75	11.9937	13.4489	16.874	14.1896	10.3847	17.2414	16.4807	14.9718	13.7863	14.1055	13.9385	1.10078	1.19544	1.16838	1.18238	PRDM16_C113	20.5487	13.5417	11.8389	17.7626	24.6456
sp|Q9NZB2-6|F120A_HUMAN	FAM120A	F120A_HUMAN Isoform F of Constitutive coactivator of PPAR-gamma-like protein 1	722	R.AFLAC#MR.S	16.275	10.8796	18.2519	15.3192	10.9601	12.7043	13.858	12.5211	12.25	8.16913	14.4598	11.6024	10.9423	11.7746	15.6872	15.1355	12.9945	12.8764	11.4104	12.8014	1.16476	1.17545	1.32646	1.18233	FAM120A_C722	25.2123	16.884	6.68567	27.6039	19.7917
sp|Q9P0K8|FOXJ2_HUMAN	FOXJ2	FOXJ2_HUMAN Forkhead box protein J2	499	R.IADSC#ALTSGK.Q	232.692	236.8	237.981	229.898	217.595	218.114	200.765	228.262	214.14	216.06	200.927	219.596	211.77	206.544	180.111	235.824	221.869	214.389	212.194	199.475	1.0629	1.09998	1.11136	1.18222	FOXJ2_C499	1.17731	3.136	6.41369	4.67322	8.50821
sp|Q6PH81|CP087_HUMAN	C16orf87	CP087_HUMAN UPF0547 protein C16orf87	19;27	K.SCPEC#DQQVPVAC#K.S	63.1722	73.7898	73.8513	57.6292	62.6774	74.3808	63.9064	68.8748	73.2495	71.9546	55.6418	49.2547	57.5312	58.003	62.7979	70.2711	64.8958	68.6769	58.9504	59.444	1.08283	1.02321	1.19204	1.18214	C16orf87_C19;27	8.74888	13.2417	6.80677	19.8574	4.90223
sp|Q9NZV1|CRIM1_HUMAN	CRIM1	CRIM1_HUMAN Cysteine-rich motor neuron 1 protein	433;438;442	R.HC#VATVC#GQTC#TNPVK.V	165.926	144.298	147.965	154.851	156.746	147.188	133.189	146.621	146.242	161.161	124.635	174.794	141.637	120.965	125.041	152.73	152.928	142.017	153.53	129.214	0.998699	1.07543	0.994788	1.18199	CRIM1_C433;438;442	7.57877	3.30909	5.3851	16.8928	8.474
sp|Q9Y6N5|SQRD_HUMAN	SQRDL	SQRD_HUMAN Sulfide:quinone oxidoreductase, mitochondrial	379	K.YDGYTSC#PLVTGYNR.V	44.1933	54.3144	35.7103	35.2277	49.202	50.7924	43.9546	36.128	34.47	47.6513	39.6941	40.0418	39.5489	44.1716	29.8445	44.7393	45.074	38.1842	42.4624	37.855	0.992575	1.17167	1.05362	1.18186	SQRDL_C379	20.8185	19.0002	13.2662	10.5908	19.3163
sp|Q9NUP1|BL1S4_HUMAN	BLOC1S4	BL1S4_HUMAN Biogenesis of lysosome-related organelles complex 1 subunit 4	210;211	R.TEDYFPC#C#SERPQL.-	30.2962	31.5896	32.6896	28.6064	24.3254	22.1171	33.6948	31.4881	29.3889	31.579	33.9775	34.12	28.8074	22.2822	28.938	31.5251	25.0163	31.5239	33.2255	26.6759	1.26018	1.00004	0.948823	1.18178	BLOC1S4_C210;211	3.80023	13.1889	6.83042	4.29695	14.2661
sp|O00299|CLIC1_HUMAN	CLIC1	CLIC1_HUMAN Chloride intracellular channel protein 1	89	K.IEEFLEAVLC#PPR.Y	69.4983	82.4964	67.7803	70.5537	77.0123	67.4113	68.5007	68.1835	69.44	67.9413	91.5703	66.917	64.5671	56.8951	64.5094	73.2583	71.6591	68.7081	75.4762	61.9905	1.02232	1.06623	0.970615	1.18177	CLIC1_C89	10.9835	6.83092	0.950988	18.4791	7.11857
sp|Q96D53|ADCK4_HUMAN	ADCK4	ADCK4_HUMAN Uncharacterized aarF domain-containing protein kinase 4	335	R.VLGMELAGGVPLDQC#QGLSQDLR.N	118.067	158.534	151.331	148.964	125.934	150.235	109.795	162.565	181.82	148.835	135.628	117.81	129.804	101.802	130.573	142.644	141.711	151.393	134.091	120.726	1.00658	0.942208	1.06378	1.18155	ADCK4_C335	15.1336	9.65218	24.6306	11.6113	13.5791
sp|Q9H8Y8|GORS2_HUMAN	GORASP2	GORS2_HUMAN Golgi reassembly-stacking protein 2	103	R.FC#SFDGANENVWHVLEVESNSPAALAGLR.P	82.5066	75.4538	91.3101	78.3991	73.8515	88.6713	73.9662	79.6661	86.71	80.8016	86.5285	71.3141	77.6068	65.6225	67.7755	83.0902	80.3073	80.1141	79.5481	70.335	1.03465	1.03715	1.04453	1.18135	GORASP2_C103	9.56096	9.45359	7.96827	9.65995	9.08365
sp|Q6IA69|NADE_HUMAN	NADSYN1	NADE_HUMAN Glutamine-dependent NAD(+) synthetase	428	K.NSSQETC#TR.A	77.7233	78.7189	68.4857	81.6553	76.57	78.5153	61.5535	67.3433	74.39	58.9402	57.7881	68.2472	64.8577	61.3591	64.2058	74.976	78.9135	67.7623	61.6585	63.4742	0.950103	1.10646	1.21599	1.1812	NADSYN1_C428	7.52604	3.25157	9.48686	9.30122	2.93116
sp|O94972|TRI37_HUMAN	TRIM37	TRI37_HUMAN E3 ubiquitin-protein ligase TRIM37	748	K.SSVANC#YIR.N	54.6116	50.7633	55.7887	44.5154	50.5504	46.0652	61.2498	47.8557	49.66	57.0106	50.7245	57.0389	46.41	42.8484	47.183	53.7212	47.0437	52.9218	54.9247	45.4805	1.14194	1.01511	0.978089	1.18119	TRIM37_C748	4.89259	6.66238	13.7344	6.62267	5.0834
sp|P12763|FETUA_BOVIN_contaminant	AHSG	FETUA_BOVIN_contaminant Alpha-2-HS-glycoprotein	132	K.C#DSSPDSAEDVR.K	531.195	620.635	692.705	418.373	406.464	499.898	548.127	481.159	509.67	518.549	480.565	470.463	507.919	565.329	488.38	614.845	441.578	512.985	489.859	520.543	1.39238	1.19856	1.25515	1.18116	AHSG_C132	13.1595	11.5169	6.55127	5.17585	7.68388
sp|Q9GZT9|EGLN1_HUMAN	EGLN1	EGLN1_HUMAN Egl nine homolog 1	42	R.SSFYC#CK.E	73.7683	65.9447	84.3318	59.9657	73.42	74.2559	65.9623	56.841	67.62	70.2175	68.409	76.9798	62.6212	69.2043	57.8799	74.6816	69.2139	63.4744	71.8688	63.2352	1.079	1.17656	1.03914	1.18101	EGLN1_C42	12.3558	11.5873	9.14417	6.28603	8.99359
sp|P46821|MAP1B_HUMAN	MAP1B	MAP1B_HUMAN Microtubule-associated protein 1B	261	K.PC#C#YIFPGGR.G	85.5749	91.8983	81.8503	82.9446	80.9713	85.2613	73.9298	55.8958	80.46	63.874	66.0161	64.158	84.3289	65.0344	70.216	86.4412	83.0591	70.0952	64.6827	73.1931	1.04072	1.2332	1.33639	1.181	MAP1B_C261	5.87646	2.58528	18.1512	1.79867	13.6431
sp|Q9UPN3|MACF1_HUMAN	MACF1	MACF1_HUMAN Microtubule-actin cross-linking factor 1, isoforms 1/2/3/5	2802;2810	K.DMLIAC#NQTAEMSC#NK.V	225.891	217.809	200.07	203.165	215.897	218.015	190.396	203.305	211.342	203.184	202.242	202.041	181.533	171.775	191.797	214.59	212.359	201.681	202.489	181.702	1.01051	1.06401	1.05976	1.181	MACF1_C2802;2810	6.15497	3.78247	5.23942	0.301364	5.51016
sp|Q96GX5|GWL_HUMAN	MASTL	GWL_HUMAN Serine/threonine-protein kinase greatwall	238;251	K.NQDPANILSAC#LSETSQLSQGLVC#PMSVDQK.D	82.8801	76.2316	83.5618	85.9994	82.552	78.7821	66.2455	78.8744	85.4207	70.5244	78.234	70.8278	66.3929	73.6582	65.461	80.8911	82.4445	76.8469	73.1954	68.504	0.981158	1.05263	1.10514	1.18082	MASTL_C238;251	5.00631	4.37856	12.6837	5.96514	6.55129
sp|Q9Y6H1|CHCH2_HUMAN	CHCHD2	CHCH2_HUMAN Coiled-coil-helix-coiled-coil-helix domain-containing protein 2, mitochondrial	134	K.LC#EGFNEVLK.Q	619.593	585.041	526.976	544.39	573.832	571.125	544.726	503.132	543.94	535.292	513.733	554.217	497.432	499.399	469.79	577.203	563.116	530.599	534.414	488.874	1.02502	1.08783	1.08007	1.18068	CHCHD2_C134	8.10863	2.88988	4.48375	3.79043	3.38656
sp|Q5EBM0|CMPK2_HUMAN	CMPK2	CMPK2_HUMAN UMP-CMP kinase 2, mitochondrial	76;85	R.SYSLC#VPVTPDAGC#GAR.V	62.4513	59.7504	60.6483	55.0586	43.4704	60.3327	49.5775	60.3132	67.2718	60.0032	57.0909	48.6135	43.9571	58.4418	52.49	60.95	52.9539	59.0542	55.2359	51.6296	1.151	1.0321	1.10345	1.18052	CMPK2_C76;85	2.25675	16.2895	15.0948	10.7124	14.1015
sp|P01130|LDLR_HUMAN	LDLR	LDLR_HUMAN Low-density lipoprotein receptor	318;325;329	K.ECGTNEC#LDNNGGC#SHVC#NDLK.I	32.3006	39.8654	37.2678	38.3215	34.4787	30.1396	31.4698	42.4238	32.1525	41.5732	30.1859	33.318	33.9942	25.3888	33.321	36.4779	34.3133	35.3487	35.0257	30.9013	1.06309	1.03195	1.04146	1.18046	LDLR_C318;325;329	10.5371	11.9296	17.3605	16.7951	15.4874
sp|Q9NZD2|GLTP_HUMAN	GLTP	GLTP_HUMAN Glycolipid transfer protein	36	K.QIETGPFLEAVSHLPPFFDC#LGSPVFTPIK.A	63.98	69.3408	64.5809	67.232	65.1675	77.2965	74.0755	67.8801	69.67	56.6639	67.5644	67.8777	55.9371	53.6474	58.0742	65.9672	69.8987	70.5419	64.0354	55.8862	0.943755	0.93515	1.03017	1.18038	GLTP_C36	4.45223	9.28393	4.51985	9.97222	3.96134
sp|Q92508|PIEZ1_HUMAN	PIEZO1	PIEZ1_HUMAN Piezo-type mechanosensitive ion channel component 1	50	R.C#GLQGHTGR.L	234.43	258.118	243.107	191.327	199.721	242.797	200.765	212.556	222.24	224.911	247.723	207.932	203.266	205.782	214.278	245.219	211.281	211.854	226.855	207.776	1.16063	1.15749	1.08095	1.18021	PIEZO1_C50	4.8873	13.0697	5.07639	8.80167	2.77724
sp|Q00403|TF2B_HUMAN	GTF2B	TF2B_HUMAN Transcription initiation factor IIB	34;37	R.AGDMIC#PEC#GLVVGDR.V	160.113	176.815	169.539	173.423	162.716	172.088	142.881	146.565	169.665	161.707	157.404	132.915	139.423	143.796	145.979	168.822	169.409	153.037	150.675	143.066	0.996536	1.10315	1.12044	1.18003	GTF2B_C34;37	4.96035	3.44393	9.4861	10.3075	2.33339
sp|Q8TF40|FNIP1_HUMAN	FNIP1	FNIP1_HUMAN Folliculin-interacting protein 1	864;865	K.DHC#C#MLEFSK.I	95.685	95.5245	86.1876	87.3057	93.3107	97.9518	85.7137	78.5708	96.2992	90.5385	87.9765	81.5245	80.4324	78.6534	76.0037	92.4657	92.8561	86.8612	86.6798	78.3632	0.995796	1.06452	1.06675	1.17996	FNIP1_C864;865	5.88062	5.74821	10.2689	5.35858	2.84389
sp|P38606|VATA_HUMAN	ATP6V1A	VATA_HUMAN V-type proton ATPase catalytic subunit A	240;254	R.VLDALFPC#VQGGTTAIPGAFGC#GK.T	117.001	107.666	120.343	133.64	116.825	117.018	117.03	106.707	114.436	111.795	128.134	94.0655	95.6281	89.5242	107.248	115.003	122.494	112.724	111.332	97.4668	0.938846	1.02022	1.03298	1.17992	ATP6V1A_C240;254	5.71314	7.88051	4.76389	15.3047	9.23787
sp|O14497|ARI1A_HUMAN	ARID1A	ARI1A_HUMAN AT-rich interactive domain-containing protein 1A	336	K.GPADM*ASQC#WGAAAAAAAAAAASGGAQQR.S	161.42	162.431	166.762	161.967	159.407	183.325	130.54	160.954	176.68	148.523	137.778	134.056	138.143	131.218	146.466	163.537	168.233	156.058	140.119	138.609	0.972088	1.04793	1.16713	1.17984	ARID1A_C336	1.73512	7.80628	15.0306	5.36159	5.50813
sp|Q96FS4|SIPA1_HUMAN	SIPA1	SIPA1_HUMAN Signal-induced proliferation-associated protein 1	732	R.VC#GQTLPSLRPEAAAQLLR.S	116.083	134.356	138.193	115.954	124.272	133.542	115.322	121.185	124.77	119.995	137.125	110.284	114.49	92.0185	122.887	129.544	124.59	120.426	122.468	109.798	1.03977	1.07572	1.05778	1.17984	SIPA1_C732	9.11993	7.06191	3.96074	11.097	14.5358
sp|P05362|ICAM1_HUMAN	ICAM1	ICAM1_HUMAN Intercellular adhesion molecule 1	92;96	K.VYELSNVQEDSQPM*C#YSNC#PDGQSTAK.T	39.0349	43.4642	47.8037	37.9906	44.3021	45.6965	44.1874	37.9237	38.8411	51.3168	48.2453	50.6995	40.8932	31.8632	37.6981	43.4343	42.6631	40.3174	50.0872	36.8181	1.01808	1.07731	0.867173	1.1797	ICAM1_C92;96	10.0945	9.62449	8.39033	3.24381	12.4365
sp|P35555|FBN1_HUMAN	FBN1	FBN1_HUMAN Fibrillin-1	637;639	R.C#EC#FPGLAVGLDGR.V	236.64	232.695	229.143	258.556	239.954	234.022	195.655	240.687	246.115	223.999	233.752	196.192	201.993	180.541	209.583	232.826	244.177	227.486	217.981	197.373	0.953511	1.02347	1.0681	1.17963	FBN1_C637;639	1.61073	5.24241	12.1763	8.94117	7.63136
sp|Q08AF3|SLFN5_HUMAN	SLFN5	SLFN5_HUMAN Schlafen family member 5	875	R.NIVFGINPGVAPPAGAYNLLLC#LASR.A	52.3483	51.2281	54.9952	53.7703	54.3045	54.4609	41.5377	43.7014	56.11	41.8856	91.6727	42.2342	45.9424	42.9954	45.5317	52.8572	54.1786	47.1164	58.5975	44.8232	0.975611	1.12184	0.902038	1.17924	SLFN5_C875	3.65971	0.668342	16.6895	48.8835	3.561
sp|Q96II8-2|LRCH3_HUMAN	LRCH3	LRCH3_HUMAN Isoform 2 of Leucine-rich repeat and calponin homology domain-containing protein 3	531	K.QHPLLDGVDGEC#PFPSR.R	136.838	157.295	131.215	131.667	145.653	153.694	124.917	125.876	126.26	144.676	120.656	119.928	119.329	123.306	118.067	141.783	143.672	125.684	128.42	120.234	0.986853	1.12809	1.10405	1.17922	LRCH3_C531	9.68029	7.75849	0.55056	10.9659	2.27422
sp|Q96IF1|AJUBA_HUMAN	AJUBA	AJUBA_HUMAN LIM domain-containing protein ajuba	270	R.HSVTGYGDC#AVGAR.Y	751.554	842.171	868.913	769.174	526.982	728.636	701.367	834.364	735.67	622.703	893.373	823.154	700.054	742.189	646.721	820.88	674.931	757.134	779.743	696.321	1.21624	1.08419	1.05276	1.17888	AJUBA_C270	7.49297	19.2198	9.1196	18.0136	6.87091
sp|O43264|ZW10_HUMAN	ZW10	ZW10_HUMAN Centromere/kinetochore protein zw10 homolog	568	R.LAPILC#DGTATFVDLVPGFR.R	234.733	286.324	274.938	277.899	249.214	290.167	197.267	264.764	308.43	258.893	310.31	220.926	229.485	210.847	234.992	265.332	272.426	256.82	263.376	225.108	0.973958	1.03314	1.00742	1.17869	ZW10_C568	10.2151	7.71502	21.8072	17.0328	5.62107
sp|P28562|DUS1_HUMAN	DUSP1	DUS1_HUMAN Dual specificity protein phosphatase 1	110	R.DGTLALAAGALC#R.E	30.87	25.4293	24.8776	21.613	20.4748	22.6756	22.6392	21.4364	24.04	21.0872	23.5068	26.013	24.8286	19.8471	24.1986	27.059	21.5878	22.7052	23.5357	22.9581	1.25344	1.19175	1.1497	1.17862	DUSP1_C110	12.2398	5.09848	5.73892	10.4651	11.8152
sp|Q9UIF9|BAZ2A_HUMAN	BAZ2A	BAZ2A_HUMAN Bromodomain adjacent to zinc finger domain protein 2A	943;955	R.C#FLMAYGVEPALC#DR.L	209.467	241.637	235.356	219.877	218.629	221.781	189.066	218.437	220.56	231.009	223.971	180.446	184.742	196.13	201.559	228.82	220.096	209.354	211.809	194.143	1.03964	1.09298	1.08031	1.17861	BAZ2A_C943;955	7.45211	0.72114	8.40787	12.9307	4.42077
sp|Q96H12|MSD3_HUMAN	MSANTD3	MSD3_HUMAN Myb/SANT-like DNA-binding domain-containing protein 3	162;172	K.EFIHFPVC#EGTSQPEPSC#SAVR.I	163.796	173.83	166.896	172.362	164.637	181.472	151.213	160.864	191.21	157.103	138.757	143.914	154.873	140.108	133.15	168.174	172.824	167.762	146.592	142.71	0.973096	1.00245	1.14723	1.17843	MSANTD3_C162;172	3.05492	4.87608	12.4411	6.45437	7.7732
sp|Q12986|NFX1_HUMAN	NFX1	NFX1_HUMAN Transcriptional repressor NF-X1	792;795	K.C#PPC#TFLTQK.W	197.159	225.345	221.065	211.866	194.482	212.052	187.88	198.973	236.428	216.014	183.265	196.948	199.171	168.305	178.651	214.523	206.133	207.76	198.742	182.042	1.0407	1.03255	1.0794	1.17843	NFX1_C792;795	7.08055	4.89521	12.2443	8.27593	8.6297
sp|O94851|MICA2_HUMAN	MICAL2	MICA2_HUMAN Protein-methionine sulfoxide oxidase MICAL2	295	K.DC#THYFVMTAK.K	201.565	196.142	191.878	212.983	200.562	220.884	208.599	184.9	172.96	191.241	189.91	204.52	178.551	166.89	154.966	196.528	211.476	188.82	195.224	166.802	0.929316	1.04083	1.00668	1.17821	MICAL2_C295	2.47026	4.8443	9.60712	4.138	7.07007
sp|O60503|ADCY9_HUMAN	ADCY9	ADCY9_HUMAN Adenylate cyclase type 9	630;633	K.TC#PSC#GITFAPK.S	133.723	134.76	129.137	117.496	124.641	149.626	109.848	115.275	122.846	118.953	124.139	112.921	119.333	105.193	113.058	132.54	130.588	115.99	118.671	112.528	1.01495	1.14269	1.11687	1.17784	ADCY9_C630;633	2.25767	12.9189	5.62803	4.73113	6.29619
sp|Q4KMQ2-2|ANO6_HUMAN	ANO6	ANO6_HUMAN Isoform 2 of Anoctamin-6	447	R.C#THVVINEITQEEER.I	18.41	27.5743	29.3492	24.2791	21.5967	19.4257	22.4085	23.0468	23.6	26.0326	26.0277	29.0799	24.4369	20.1946	19.3297	25.1112	21.7672	23.0184	27.0467	21.3204	1.15363	1.09092	0.928436	1.1778	ANO6_C447	23.3794	11.1692	2.5904	6.51013	12.8205
sp|Q96GX5|GWL_HUMAN	MASTL	GWL_HUMAN Serine/threonine-protein kinase greatwall	455	R.NFELVDSSPC#K.K	56.315	46.6403	45.6362	35.632	47.4652	54.0546	44.319	39.4888	41.73	42.7753	39.0415	38.0342	44.1861	37.9568	44.0262	49.5305	45.7173	41.8459	39.9503	42.0564	1.08341	1.18364	1.2398	1.17772	MASTL_C455	11.9057	20.4187	5.77639	6.25225	8.44395
sp|O94927|HAUS5_HUMAN	HAUS5	HAUS5_HUMAN HAUS augmin-like complex subunit 5	533	R.SLWC#WDLLHMK.T	287.525	246.822	255.074	267.65	271.22	253.026	283.768	216.301	269.1	253.093	352.013	258.898	230.71	218.198	221.527	263.14	263.965	256.39	288.002	223.479	0.996873	1.02633	0.913676	1.17747	HAUS5_C533	8.17704	3.65209	13.8397	19.2748	2.89977
sp|P62633|CNBP_HUMAN	CNBP	CNBP_HUMAN Cellular nucleic acid-binding protein	161	R.C#GESGHLAR.E	33.9733	45.5917	35.1435	35.184	38.7057	29.7541	25.4813	29.5933	36.14	36.5935	23.43	31.0629	36.1626	30.5392	30.7187	38.2362	34.5479	30.4048	30.3621	32.4735	1.10676	1.25757	1.25934	1.17746	CNBP_C161	16.7299	13.0531	17.6798	21.7695	9.84221
sp|Q6P4F7|RHGBA_HUMAN	ARHGAP11A	RHGBA_HUMAN Rho GTPase-activating protein 11A	451	R.EVNGC#SGVNR.Y	83.4399	87.0365	96.7517	76.17	89.8063	87.4526	70.7112	69.4788	88.11	90.0222	72.2095	80.059	76.318	74.2563	76.384	89.076	84.4763	76.1	80.7636	75.6528	1.05445	1.17051	1.10292	1.17743	ARHGAP11A_C451	7.73075	8.62852	13.6915	11.0535	1.59917
sp|P15924|DESP_HUMAN_contaminant	DSP	DESP_HUMAN_contaminant Desmoplakin	1069	K.YQAEC#SQFK.A	7.78166	8.78229	8.07419	7.92186	7.72388	7.8663	8.56259	7.88842	7.29	8.72375	10.8257	7.95663	5.54696	12.0419	3.33899	8.21271	7.83735	7.91367	9.16868	6.97596	1.04789	1.03779	0.895735	1.17729	DSP_C1069	6.26466	1.30295	8.04519	16.2004	64.8517
sp|Q8IVU3|HERC6_HUMAN	HERC6	HERC6_HUMAN Probable E3 ubiquitin-protein ligase HERC6	4	-.MYFC#WGADSR.E	7.11666	8.09115	7.83486	7.11328	7.92884	4.60406	9.46136	8.36686	8.14	7.74161	5.66876	8.0798	6.36826	3.9427	9.26419	7.68089	6.54873	8.65607	7.16339	6.52505	1.17288	0.887341	1.07224	1.17714	HERC6_C4	6.57683	26.46	8.1626	18.223	40.8305
sp|P52888|THOP1_HUMAN	THOP1	THOP1_HUMAN Thimet oligopeptidase	18	-.MKPPAAC#AGDM*ADAASPC#SVVNDLR.W	38.99	41.1469	48.0798	34.7251	47.4652	37.5711	29.6351	45.8252	43.02	43.9307	39.2206	39.0072	32.4983	38.6652	37.761	42.7389	39.9205	39.4934	40.7195	36.3082	1.0706	1.08218	1.04959	1.17712	THOP1_C18	11.1127	16.751	21.9075	6.83465	9.17213
sp|Q2PZI1|D19L1_HUMAN	DPY19L1	D19L1_HUMAN Probable C-mannosyltransferase DPY19L1	497	R.QLFGWLFC#K.V	324.858	286.241	348.903	324.534	274.91	287.643	305.703	248.567	220.47	249.072	867.768	302.18	263.31	285.678	266.646	320.001	295.696	258.247	473.006	271.878	1.0822	1.23913	0.676525	1.177	DPY19L1_C497	9.87882	8.71625	16.8184	72.4944	4.4385
sp|Q9BWD1|THIC_HUMAN	ACAT2	THIC_HUMAN Acetyl-CoA acetyltransferase, cytosolic	148;158	K.IGEM*PLTDSILC#DGLTDAFHNC#HMGITAENVAK.K	204.159	220.519	191.849	214.817	176.899	218.112	183.141	181.259	196.317	197.539	186.108	174.772	183.285	170.072	170.588	205.509	203.276	186.906	186.14	174.648	1.01098	1.09953	1.10406	1.1767	ACAT2_C148;158	6.99849	11.2667	4.38983	6.11552	4.2851
sp|Q9UJK0|TSR3_HUMAN	TSR3	TSR3_HUMAN Ribosome biogenesis protein TSR3 homolog	283;284	R.GGASSSC#C#EEEQTQGR.G	31.4291	24.214	16.8405	21.5123	20.8112	19.3306	16.3404	20.9264	19.295	19.0538	21.8495	23.6281	18.5217	21.9186	21.1635	24.1612	20.5514	18.8539	21.5105	20.5346	1.17565	1.28149	1.12323	1.17661	TSR3_C283;284	30.1906	5.4198	12.3295	10.7199	8.68605
sp|P08581-2|MET_HUMAN	MET	MET_HUMAN Isoform 2 of Hepatocyte growth factor receptor	584	R.LTIC#GWDFGFR.R	136.78	120.903	135.724	114.271	117.649	117.674	120.435	87.1577	117.23	122.976	160.338	131.149	111.129	109.086	114.145	131.136	116.532	108.274	138.154	111.453	1.12532	1.21114	0.949198	1.1766	MET_C584	6.76996	1.67969	16.9546	14.2169	2.28366
sp|Q8NG06|TRI58_HUMAN	TRIM58	TRI58_HUMAN Tripartite motif-containing protein 58	57;60	K.SDGAQGGVYAC#PQC#R.G	99.2421	122.831	96.401	103.989	110.647	115.203	80.6651	89.9624	112.721	99.0901	72.2628	83.7071	84.3297	84.4792	101.871	106.158	109.946	94.4497	85.02	90.2267	0.965545	1.12397	1.24863	1.17657	TRIM58_C57;60	13.6675	5.12938	17.4617	15.8337	11.1771
sp|Q9NPG8|ZDHC4_HUMAN	ZDHHC4	ZDHC4_HUMAN Probable palmitoyltransferase ZDHHC4	337	R.SNLQEIFLPAFPC#HER.K	78.6216	91.7076	84.1176	81.7973	76.6886	84.6335	71.2213	85.8508	82.04	80.0852	85.1593	77.1522	79.5906	65.1948	71.4788	84.8156	81.0398	79.704	80.7989	72.0881	1.04659	1.06413	1.04971	1.17656	ZDHHC4_C337	7.74724	4.96822	9.52189	5.01368	10.0116
sp|O15111|IKKA_HUMAN	CHUK	IKKA_HUMAN Inhibitor of nuclear factor kappa-B kinase subunit alpha	77;98	K.AC#DVPEELNILIHDVPLLAMEYC#SGGDLR.K	41.1433	45.57	44.2747	41.8464	41.2736	36.3599	37.5418	38.0319	43.9082	39.5673	43.2214	32.3795	34.4121	35.4386	41.4838	43.6627	39.8266	39.8273	38.3894	37.1115	1.09632	1.0963	1.13736	1.17653	CHUK_C77;98	5.21257	7.57252	8.89508	14.3688	10.2964
sp|Q969E2|SCAM4_HUMAN	SCAMP4	SCAM4_HUMAN Secretory carrier-associated membrane protein 4	20	K.PC#FYQNFSDEIPVEHQVLVK.R	216.72	221.166	248.31	186.224	207.002	227.236	181.928	211.4	220.23	185.775	198.79	175.268	192.21	193.486	197.547	228.732	206.821	204.519	186.611	194.414	1.10594	1.11839	1.22571	1.17652	SCAMP4_C20	7.47598	9.91528	9.80684	6.31457	1.43347
sp|Q15269|PWP2_HUMAN	PWP2	PWP2_HUMAN Periodic tryptophan protein 2 homolog	86	R.LAIIVDEGGDALLVSLVC#R.S	24.5583	23.63	29.3744	24.8364	27.0875	28.8062	23.3558	22.4167	23.12	27.3845	31.5557	21.5667	22.8701	25.9416	17.1321	25.8542	26.91	22.9642	26.8356	21.9813	0.960766	1.12585	0.96343	1.17619	PWP2_C86	11.9273	7.39808	2.12763	18.6956	20.3424
sp|Q9BWD1|THIC_HUMAN	ACAT2	THIC_HUMAN Acetyl-CoA acetyltransferase, cytosolic	65	R.ATVAPEDVSEVIFGHVLAAGC#GQNPVR.Q	135.543	155.376	152.414	136.791	135.038	157.683	125.828	126.612	137.25	142.966	147.081	133.12	123.208	128.652	125.097	147.778	143.171	129.896	141.055	125.652	1.03218	1.13766	1.04766	1.17609	ACAT2_C65	7.23964	8.79949	4.91199	5.08586	2.19989
sp|P29692-2|EF1D_HUMAN	EEF1D	EF1D_HUMAN Isoform 2 of Elongation factor 1-delta	327	K.PAYDSAEC#R.H	20.4167	24.3688	21.5773	18.0946	15.739	20.4105	22.9307	25.3573	23.16	18.3025	18.03	32.8365	21.1138	18.3636	16.9499	22.1209	18.0814	23.816	23.0563	18.8091	1.22341	0.928826	0.959429	1.17607	EEF1D_C327	9.18299	12.9181	5.62527	36.7403	11.2572
sp|O75420|PERQ1_HUMAN	GIGYF1	PERQ1_HUMAN PERQ amino acid-rich with GYF domain-containing protein 1	177	R.C#GFEEGGAGPR.K	109.375	97.7254	80.301	89.5225	106.646	101.031	91.4679	101.068	102.31	101.6	79.8745	92.4866	91.4553	64.0053	88.9508	95.8004	99.0663	98.2818	91.3203	81.4705	0.967033	0.974752	1.04906	1.17589	GIGYF1_C177	15.2737	8.81125	6.03737	11.9465	18.6288
sp|O94761|RECQ4_HUMAN	RECQL4	RECQ4_HUMAN ATP-dependent DNA helicase Q4	1008	R.ALC#QLQWDHEPR.T	29.3183	29.5404	29.513	31.2176	36.0196	28.5353	31.8091	27.4111	23.63	20.5904	29.0348	24.2763	26.547	25.0061	23.6037	29.4572	31.9242	27.6167	24.6338	25.0523	0.922725	1.06664	1.1958	1.17583	RECQL4_C1008	0.411097	11.8776	14.8223	17.1859	5.87668
sp|O43772|MCAT_HUMAN	SLC25A20	MCAT_HUMAN Mitochondrial carnitine/acylcarnitine carrier protein	89	R.GMAAPIIGVTPMFAVC#FFGFGLGK.K	36.5866	41.3137	48.5207	54.7756	39.6226	36.0939	48.6064	43.538	32.71	33.2311	176.064	47.8506	36.9081	31.0203	39.5944	42.1404	43.4974	41.6181	85.7153	35.8409	0.968803	1.01255	0.491631	1.17576	SLC25A20_C89	14.2614	22.8182	19.5113	91.6815	12.2361
sp|Q6ICG6|K0930_HUMAN	KIAA0930	K0930_HUMAN Uncharacterized protein KIAA0930	19;23	R.EVC#GLGC#FK.D	279.071	273.118	272.703	288.644	280.747	272.066	246.945	259.485	273.213	265.699	258.482	240.964	249.752	224.939	226.896	274.964	280.486	259.881	255.048	233.862	0.980314	1.05804	1.07809	1.17575	KIAA0930_C19;23	1.29583	2.9564	5.05556	4.98724	5.899
sp|Q969S8|HDA10_HUMAN	HDAC10	HDA10_HUMAN Histone deacetylase 10	145	R.AAANGFC#VFNNVAIAAAHAK.Q	22.9717	16.504	16.1232	22.1812	21.2191	25.8271	23.7566	19.0559	21.06	17.9675	39.9372	20.4705	18.0181	13.619	15.6508	18.533	23.0758	21.2908	26.1251	15.7626	0.803134	0.870466	0.709394	1.17575	HDAC10_C145	20.767	10.5338	11.0792	46.0362	13.9678
sp|Q9ULD2|MTUS1_HUMAN	MTUS1	MTUS1_HUMAN Microtubule-associated tumor suppressor 1	975	R.GELVTASTTC#EK.L	27.195	29.0757	36.9699	19.9085	33.1609	34.7028	23.5137	19.5694	25.15	29.5452	26.7826	30.4347	29.9965	23.6027	25.7042	31.0802	29.2574	22.7444	28.9209	26.4345	1.0623	1.3665	1.07466	1.17575	MTUS1_C975	16.6878	27.7982	12.6131	6.58491	12.3281
sp|Q9UPN3|MACF1_HUMAN	MACF1	MACF1_HUMAN Microtubule-actin cross-linking factor 1, isoforms 1/2/3/5	6137	K.LC#TMPPVGTDLNTVK.D	186.912	184.404	183.225	168.905	162.773	183.19	163.588	167.641	163.53	163.602	179.545	158.899	172.752	148.954	149.951	184.847	171.623	164.92	167.349	157.219	1.07705	1.12083	1.10456	1.17573	MACF1_C6137	1.01857	6.1042	1.42902	6.46612	8.56197
sp|Q9Y446|PKP3_HUMAN	PKP3	PKP3_HUMAN Plakophilin-3	129	R.SAVDLSC#SR.R	90.1483	75.9186	72.7181	68.0515	88.4902	73.5173	81.715	81.9999	85.72	77.5778	99.0305	86.2913	69.2801	59.1672	74.6599	79.595	76.6863	83.145	87.6332	67.7024	1.03793	0.957303	0.908274	1.17566	PKP3_C129	11.6571	13.7984	2.68756	12.3117	11.6184
sp|Q9UK97|FBX9_HUMAN	FBXO9	FBX9_HUMAN F-box only protein 9	68	R.AQWMFELAPGVSSSNLENRPC#R.A	68.3083	65.9447	53.4458	63.7901	66.3757	65.294	62.0879	55.184	66.91	52.9665	63.5592	49.8952	59.2476	51.0412	49.3685	62.5663	65.1533	61.3939	55.4736	53.2191	0.960293	1.01909	1.12786	1.17564	FBXO9_C68	12.7648	1.99307	9.59988	12.9227	9.93506
sp|P26374|RAE2_HUMAN	CHML	RAE2_HUMAN Rab proteins geranylgeranyltransferase component A 2	320	R.QC#SFSEYLK.T	27.8366	22.3788	22.837	28.7372	20.5287	25.6916	25.9064	18.4958	17.79	27.3383	27.7424	29.3632	17.3611	23.1884	21.6003	24.3508	24.9859	20.7307	28.1479	20.7166	0.974583	1.17462	0.8651	1.17543	CHML_C320	12.4329	16.6075	21.6882	3.80717	14.5414
sp|Q9HBH0|RHOF_HUMAN	RHOF	RHOF_HUMAN Rho-related GTP-binding protein RhoF	131	R.GIPMVLIGC#K.T	115.827	113.217	107.71	93.9587	103.15	117.465	100.541	96.5282	104.9	112.265	130.343	90.4666	104.975	82.6229	98.9071	112.251	104.858	100.656	111.025	95.5017	1.07051	1.11519	1.01105	1.17538	RHOF_C131	3.69111	11.2971	4.15982	17.9844	12.1031
sp|P53355-3|DAPK1_HUMAN	DAPK1	DAPK1_HUMAN Isoform 3 of Death-associated protein kinase 1	315	R.LISLC#QR.L	127.563	123.965	109.373	129.383	120.055	132.336	114.168	119.902	115.19	107.25	113.081	133.797	111.129	102.123	93.8439	120.3	127.258	116.42	118.043	102.365	0.945328	1.03333	1.01913	1.17521	DAPK1_C315	8.00734	5.0375	2.62702	11.8192	8.44517
sp|Q2TAA5|ALG11_HUMAN	ALG11	ALG11_HUMAN GDP-Man:Man(3)GlcNAc(2)-PP-Dol alpha-1,2-mannosyltransferase	84	R.VLWC#ALR.A	10.955	11.2966	13.4402	8.21688	8.96445	14.4646	6.92294	5.91632	12.88	11.3351	13.3593	11.4176	10.3232	10.8925	9.15492	11.8973	10.5487	8.57309	12.0374	10.1235	1.12785	1.38775	0.988362	1.17521	ALG11_C84	11.3226	32.3442	43.9014	9.51709	8.75032
sp|P62820|RAB1A_HUMAN	RAB1A	RAB1A_HUMAN Ras-related protein Rab-1A	205	K.QSGGGCC#.-	63.4433	75.6326	80.5529	56.8079	71.3272	68.5193	70.2618	68.8487	66.95	66.2427	69.1256	73.568	60.7133	65.1013	61.0854	73.2096	65.5515	68.6868	69.6455	62.3	1.11683	1.06585	1.05118	1.17511	RAB1A_C205	12.0318	11.7483	2.41942	5.29857	3.90549
sp|P49750-4|YLPM1_HUMAN	YLPM1	YLPM1_HUMAN Isoform 4 of YLP motif-containing protein 1	1967	K.GFEVYLAEMSADNQTC#GK.R	121.287	138.133	116.906	122.215	122.654	136.694	114.629	120.24	134.26	121.948	122.806	116.985	104.053	101.134	115.08	125.442	127.188	123.043	120.579	106.755	0.986273	1.0195	1.04033	1.17504	YLPM1_C1967	8.9343	6.47501	8.21748	2.60628	6.89008
sp|Q9H0C8|ILKAP_HUMAN	ILKAP	ILKAP_HUMAN Integrin-linked kinase-associated serine/threonine phosphatase 2C	312	R.C#QLTPNDR.F	52.0683	53.8854	66.3318	54.3603	51.8989	49.7706	60.8247	53.3285	46.85	54.769	50.4302	52.5556	49.8847	48.7825	47.9601	57.4285	52.01	53.6678	52.5849	48.8758	1.10418	1.07007	1.09211	1.17499	ILKAP_C312	13.5191	4.41621	13.0312	4.12579	1.97579
sp|Q12841|FSTL1_HUMAN	FSTL1	FSTL1_HUMAN Follistatin-related protein 1	31;36	K.IC#ANVFC#GAGR.E	149.06	160.3	163.328	159.97	146.22	158.137	136.155	137.138	167.969	139.284	139.587	124.923	125.459	137.091	139.788	157.563	154.776	147.088	134.598	134.113	1.01801	1.07122	1.17061	1.17485	FSTL1_C31;36	4.77088	4.82362	12.2992	6.22599	5.67813
sp|P98155|VLDLR_HUMAN	VLDLR	VLDLR_HUMAN Very low-density lipoprotein receptor	303;312	R.DC#VDGSDEVNC#K.N	83.0222	93.0025	87.7346	83.4244	81.5234	63.169	83.5094	70.4069	84.6491	88.0951	81.8339	79.7559	79.1266	78.1938	67.2265	87.9198	76.0389	79.5218	83.2283	74.849	1.15625	1.10561	1.05637	1.17463	VLDLR_C303;312	5.67874	14.711	9.95233	5.2157	8.84143
sp|Q7L3B6|CD37L_HUMAN	CDC37L1	CD37L_HUMAN Hsp90 co-chaperone Cdc37-like 1	35;54	R.C#PQLPGGGAQMYSHGIELAC#QK.Q	302.979	276.716	241.682	295.291	304.019	292.81	275.982	275.06	297.548	285.93	255.389	242.458	249.283	214.688	235.408	273.793	297.373	282.863	261.259	233.126	0.920703	0.967933	1.04797	1.17444	CDC37L1_C35;54	11.2322	1.97979	4.4988	8.54421	7.46792
sp|Q86YP4-3|P66A_HUMAN	GATAD2A	P66A_HUMAN Isoform 3 of Transcriptional repressor p66-alpha	439;442	K.SGAIMC#ENC#MTTNQK.K	36.3963	42.4493	32.0211	36.9841	41.7611	35.7358	30.4157	37.098	39.855	37.2703	27.6284	33.9086	36.3834	26.7687	31.2559	36.9556	38.1603	35.7896	32.9358	31.4693	0.968429	1.03258	1.12205	1.17434	GATAD2A_C439;442	14.1698	8.33379	13.562	14.8593	15.2877
sp|P11047|LAMC1_HUMAN	LAMC1	LAMC1_HUMAN Laminin subunit gamma-1	842	R.LCQCSDNIDPNAVGNC#NR.L	58.52	69.5076	64.8454	63.3093	60.2808	60.8253	46.6752	67.8101	70.58	68.8541	57.5577	57.6548	53.1952	51.7362	59.3127	64.291	61.4718	61.6884	61.3555	54.748	1.04586	1.04219	1.04784	1.17431	LAMC1_C842	8.57783	2.62634	21.1958	10.5844	7.34247
sp|Q6IPR3|TYW3_HUMAN	TYW3	TYW3_HUMAN tRNA wybutosine-synthesizing protein 3 homolog	70;71	K.QNC#C#WLLVTHK.L	214.266	190.029	184.085	186.299	157.628	175.832	170.087	131.014	155.513	170.444	200.329	153.859	182.397	153.287	165.379	196.127	173.253	152.205	174.878	167.021	1.13202	1.28857	1.12151	1.17426	TYW3_C70;71	8.15169	8.37414	12.9727	13.4667	8.75603
sp|O43257|ZNHI1_HUMAN	ZNHIT1	ZNHI1_HUMAN Zinc finger HIT domain-containing protein 1	140	R.C#LGTHQETR.C	245.595	226.838	232.338	223.604	221.673	241.578	214.332	217.398	196.8	222.693	212.738	208.437	205.187	195.077	199.963	234.924	228.952	209.51	214.623	200.076	1.02608	1.1213	1.09459	1.17417	ZNHIT1_C140	4.10432	4.7945	5.30454	3.40707	2.52707
sp|O00592|PODXL_HUMAN	PODXL	PODXL_HUMAN Podocalyxin	381	K.LISLIC#R.A	819.606	699.485	602.843	699.713	549.172	455.174	577.191	1011.94	936.93	930.634	686.636	864.612	629.497	575.34	602.355	707.311	568.02	842.019	827.294	602.397	1.24522	0.840019	0.85497	1.17416	PODXL_C381	15.353	21.7165	27.5995	15.2554	4.49518
sp|P55199|ELL_HUMAN	ELL	ELL_HUMAN RNA polymerase II elongation factor ELL	411	R.DC#EHGEAAAPAPTVR.L	16.9867	20.5437	15.8587	21.165	15.8469	17.6899	16.2993	21.0047	14.14	25.6282	13.2314	14.7801	16.9315	12.2959	16.2457	17.7963	18.234	17.148	17.8799	15.1577	0.975999	1.03781	0.995326	1.17408	ELL_C411	13.7399	14.8102	20.4698	37.7785	16.5066
sp|O95197-5|RTN3_HUMAN	RTN3	RTN3_HUMAN Isoform 5 of Reticulon-3	42	K.SC#SSSC#AVHDLIFWR.D	53.41	50.6442	65.8657	58.5234	62.8482	63.152	55.7115	55.5224	70.65	59.8299	55.8046	48.6266	46.0688	55.9462	42.7148	56.6399	61.5079	60.6279	54.7537	48.2433	0.920857	0.934222	1.03445	1.17405	RTN3_C42	14.3159	4.20932	14.3166	10.3648	14.2579
sp|Q8WTV0-2|SCRB1_HUMAN	SCARB1	SCRB1_HUMAN Isoform 1 of Scavenger receptor class B member 1	470	K.C#YLFWSSSK.K	145.11	124.859	112.409	128.279	126.301	116.431	117.362	105.829	92.35	95.7417	137.535	115.765	121.995	104.782	98.9314	127.459	123.67	105.18	116.347	108.57	1.03064	1.21182	1.09551	1.17399	SCARB1_C470	12.9492	5.13221	11.9021	17.9656	11.0429
sp|Q86XX4-2|FRAS1_HUMAN	FRAS1	FRAS1_HUMAN Isoform 2 of Extracellular matrix protein FRAS1	1065;1068	R.C#HLC#DHGFFLK.S	84.9268	96.8163	87.4549	79.5416	88.6906	83.7384	70.4736	86.4059	89.4786	87.6041	78.475	71.1549	77.0061	75.1801	77.1402	89.7327	83.9902	82.1194	79.078	76.4421	1.06837	1.09271	1.13474	1.17386	FRAS1_C1065;1068	6.98013	5.45266	12.4233	10.4216	1.43245
sp|P28288|ABCD3_HUMAN	ABCD3	ABCD3_HUMAN ATP-binding cassette sub-family D member 3	472;477	R.SGANVLIC#GPNGC#GK.S	111.18	116.003	109.809	113.115	107.798	113.869	111.39	100.9	99.2155	100.817	113.017	91.2924	98.6	99.1586	89.3533	112.331	111.594	103.835	101.709	95.704	1.0066	1.08182	1.10444	1.17373	ABCD3_C472;477	2.89603	2.96543	6.35295	10.707	5.75414
sp|O15230|LAMA5_HUMAN	LAMA5	LAMA5_HUMAN Laminin subunit alpha-5	758;773	R.C#KPGFWGLSPSNPEGC#TR.C	173.387	194.322	168.275	181.38	194.88	190.368	131.089	168.389	206.778	193.251	152.265	156.257	160.945	134.914	160.831	178.661	188.876	168.752	167.257	152.23	0.945917	1.05872	1.06818	1.17362	LAMA5_C758;773	7.72481	3.63864	22.427	13.5115	9.85091
sp|Q9UK61|F208A_HUMAN	FAM208A	F208A_HUMAN Protein FAM208A	886;889	K.EDPNLISVNNFEDC#SLC#PSVPIEHGFR.R	118.964	113.379	103.994	113.502	119.828	111.257	96.9969	103.956	104.886	117.018	114.342	101.114	105.174	92.4926	88.9168	112.113	114.863	101.946	110.825	95.5278	0.976057	1.09972	1.01162	1.17361	FAM208A_C886;889	6.74742	3.86918	4.22919	7.68359	8.94297
sp|Q8NCN5|PDPR_HUMAN	PDPR	PDPR_HUMAN Pyruvate dehydrogenase phosphatase regulatory subunit, mitochondrial	85	R.FC#AGILSTAR.H	275.986	273.002	283.516	261.727	262.321	287.286	250.368	251.986	262.4	255.646	252.42	241.212	235.967	239.689	233.717	277.501	270.445	254.918	249.759	236.458	1.02609	1.08859	1.11108	1.17358	PDPR_C85	1.95255	5.39411	2.56161	3.03343	1.2755
sp|Q03426|KIME_HUMAN	MVK	KIME_HUMAN Mevalonate kinase	173	K.DGDC#VNR.W	420.921	390.02	355.655	420.11	391.07	408.654	354.358	396.545	383.15	366.247	312.23	374.947	343.115	321.938	329.116	388.865	406.611	378.018	351.141	331.39	0.956357	1.0287	1.10743	1.17344	MVK_C173	8.39588	3.59738	5.70263	9.67648	3.25003
sp|Q13905-3|RPGF1_HUMAN	RAPGEF1	RPGF1_HUMAN Isoform 3 of Rap guanine nucleotide exchange factor 1	835	R.C#ATSSQPLAAR.G	59.01	46.0802	62.6789	59.2992	56.6022	65.1586	40.6025	50.6213	54.2	54.0988	44.4287	46.5697	54.3829	40.122	48.4701	55.923	60.3533	48.4746	48.3657	47.6583	0.926594	1.15366	1.15625	1.17342	RAPGEF1_C835	15.5915	7.24811	14.5403	10.5014	15.0342
sp|Q96S38|KS6C1_HUMAN	RPS6KC1	KS6C1_HUMAN Ribosomal protein S6 kinase delta-1	905	R.FYIPEGC#IQR.W	113.657	112.895	124.627	119.418	110.648	113.981	98.2329	97.4267	110.81	110.497	122.627	110.173	97.0275	95.1326	107.164	117.059	114.682	102.157	114.432	99.7745	1.02073	1.14588	1.02296	1.17324	RPS6KC1_C905	5.60811	3.86014	7.34652	6.20317	6.48341
sp|Q9H814|PHAX_HUMAN	PHAX	PHAX_HUMAN Phosphorylated adapter RNA export protein	87	K.C#FNPPPKPEPFQFGQSSQKPPVAGGK.K	69.72	67.5534	50.4101	67.3741	56.7748	62.1302	58.9665	49.361	55.56	65.1335	56.6364	57.0636	54.7493	48.2345	57.0179	62.5611	62.093	54.6292	59.6112	53.3339	1.00754	1.1452	1.04949	1.17301	PHAX_C87	16.9094	8.53512	8.91452	8.0308	8.54902
sp|Q9UL03|INT6_HUMAN	INTS6	INT6_HUMAN Integrator complex subunit 6	659	R.C#MSPLLR.G	317.123	324.79	280.191	284.499	309.333	305.185	261.967	278.72	312.85	288.589	271.653	278.765	264.081	248.056	273.992	307.368	299.672	284.512	279.669	262.043	1.02568	1.08033	1.09904	1.17297	INTS6_C659	7.75824	4.4393	9.11435	3.04079	4.99444
sp|Q9P2D3|HTR5B_HUMAN	HEATR5B	HTR5B_HUMAN HEAT repeat-containing protein 5B	1896	K.NALNSC#DPWVQAK.C	205.497	221.345	202.107	231.406	197.941	217.376	174.033	198.693	207.31	198.763	185.892	176.191	176.618	173.332	186.267	209.649	215.574	193.345	186.949	178.739	0.972517	1.08433	1.12143	1.17294	HEATR5B_C1896	4.89838	7.79554	8.93267	6.05666	3.76168
sp|O95897|NOE2_HUMAN	OLFM2	NOE2_HUMAN Noelin-2	44;56	K.C#ICTAVIPAQSTC#SR.D	49.2704	50.5295	38.1374	39.033	46.3779	36.654	37.1557	37.9995	38.3477	37.6666	39.9752	39.6456	37.9271	39.9263	39.7529	45.9791	40.6883	37.8343	39.0958	39.2021	1.13003	1.21527	1.17606	1.17287	OLFM2_C44;56	14.8334	12.4579	1.61996	3.19373	2.82534
sp|P42224|STAT1_HUMAN	STAT1	STAT1_HUMAN Signal transducer and activator of transcription 1-alpha/beta	492	R.NLSFFLTPPC#AR.W	775.448	644.206	641.866	738.962	748.58	765.628	600.851	697.834	671.35	618.439	673.047	609.877	608.826	566.238	582.77	687.173	751.057	656.678	633.788	585.945	0.914942	1.04644	1.08423	1.17276	STAT1_C492	11.1263	1.79808	7.63365	5.40685	3.66428
sp|Q86XI2-2|CNDG2_HUMAN	NCAPG2	CNDG2_HUMAN Isoform 2 of Condensin-2 complex subunit G2	401	R.STGILGVC#K.I	199.932	227.72	222.953	195.938	212.622	226.215	172.454	200.828	227.48	197.064	172.686	162.027	194.548	178.45	181.799	216.868	211.592	200.254	177.259	184.932	1.02494	1.08297	1.22345	1.17269	NCAPG2_C401	6.8521	7.16699	13.7412	10.1325	4.59291
sp|Q8IWZ3-6|ANKH1_HUMAN	ANKHD1	ANKH1_HUMAN Isoform 6 of Ankyrin repeat and KH domain-containing protein 1	615	R.AGHLC#TVQFLISK.G	323.236	303.019	289.235	317.53	291.436	316.117	271.634	246.338	274.55	295.337	355.519	263.394	275.111	235.6	269.985	305.163	308.361	264.174	304.75	260.232	0.98963	1.15516	1.00136	1.17266	ANKHD1_C615	5.60421	4.75882	5.87305	15.3498	8.25638
sp|Q6ZRS2|SRCAP_HUMAN	SRCAP	SRCAP_HUMAN Helicase SRCAP	3036	R.DSTSVLESC#GLGR.R	53.8183	64.8007	59.492	54.8521	56.5807	58.1417	49.1408	59.4316	52.49	52.666	51.4027	57.2114	49.0508	48.7023	54.1403	59.3703	56.5248	53.6874	53.76	50.6311	1.05034	1.10585	1.10436	1.17261	SRCAP_C3036	9.25076	2.91115	9.77671	5.68258	6.01212
sp|Q86XK3-2|SFR1_HUMAN	SFR1	SFR1_HUMAN Isoform 2 of Swi5-dependent recombination DNA repair protein 1 homolog	157	K.PASSTEENC#LEFQESFK.H	9.02999	10.3433	14.8258	8.10761	7.37868	7.74319	11.7447	10.619	7.44	6.18173	11.9901	12.6247	9.89355	10.9059	8.3657	11.3997	7.74316	9.93458	10.2655	9.72171	1.47223	1.14748	1.11048	1.1726	SFR1_C157	26.6574	4.70697	22.4719	34.5902	13.1539
sp|Q8IYP9|ZDH23_HUMAN	ZDHHC23	ZDH23_HUMAN Palmitoyltransferase ZDHHC23	212	R.SLSSSQLEC#LSR.K	80.3949	93.2568	89.9875	64.6096	78.6735	81.1004	55.6508	64.0643	85.81	76.7806	55.8302	81.266	75.7621	85.2023	63.8901	87.8797	74.7945	68.5083	71.2923	74.9515	1.17495	1.28276	1.23267	1.17249	ZDHHC23_C212	7.60693	11.9039	22.717	19.0442	14.2481
sp|Q969K3-2|RNF34_HUMAN	RNF34	RNF34_HUMAN Isoform 2 of E3 ubiquitin-protein ligase RNF34	66	K.AC#GLSFSVFR.K	26.355	25.3221	24.3107	23.263	25.1242	22.0724	24.3882	20.7246	18.02	25.7437	46.6425	27.4541	19.269	22.5201	23.0208	25.3293	23.4865	21.0443	33.2801	21.6033	1.07846	1.20362	0.761093	1.17247	RNF34_C66	4.03543	6.54894	15.1875	34.8669	9.42915
sp|Q01081|U2AF1_HUMAN	U2AF1	U2AF1_HUMAN Splicing factor U2AF 35 kDa subunit	169	R.GGFC#NFMHLK.P	306.646	285.967	338.297	296.584	251.069	269.682	250.793	221.623	282.2	277.092	290.642	242.961	263.499	250.087	280.403	310.303	272.445	251.538	270.232	264.663	1.13896	1.23362	1.14829	1.17245	U2AF1_C169	8.49367	8.39897	12.0441	9.0922	5.73982
sp|Q9BYW2|SETD2_HUMAN	SETD2	SETD2_HUMAN Histone-lysine N-methyltransferase SETD2	1529	R.LLM*IEC#SSR.C	105.688	101.026	99.3213	100.209	103.539	92.5736	82.8446	95.968	103.1	87.2144	87.1812	88.8408	91.6448	89.3455	80.0873	102.012	98.7738	93.9709	87.7455	87.0259	1.03278	1.08557	1.16259	1.1722	SETD2_C1529	3.23095	5.69147	10.9335	1.08126	7.03006
sp|O15020|SPTN2_HUMAN	SPTBN2	SPTN2_HUMAN Spectrin beta chain, non-erythrocytic 2	115	R.IHC#LENVDK.A	46.83	49.238	37.2345	34.2443	34.5525	41.0303	41.149	44.2382	38.97	39.9213	36.9685	40.6823	42.1265	35.0031	36.5954	44.4342	36.609	41.4524	39.1907	37.9083	1.21375	1.07193	1.13379	1.17215	SPTBN2_C115	14.2915	10.4675	6.38603	5.00559	9.86275
sp|P28288|ABCD3_HUMAN	ABCD3	ABCD3_HUMAN ATP-binding cassette sub-family D member 3	477	R.SGANVLIC#GPNGC#GK.S	47.2733	46.6045	38.3933	37.0306	35.0271	33.4595	39.4608	49.0226	34.25	29.8919	44.9406	32.5778	37.9948	38.5983	36.2554	44.0904	35.1724	40.9111	35.8034	37.6162	1.25355	1.07771	1.23146	1.17211	ABCD3_C477	11.2159	5.0892	18.3137	22.4173	3.23393
sp|Q6UB35|C1TM_HUMAN	MTHFD1L	C1TM_HUMAN Monofunctional C1-tetrahydrofolate synthase, mitochondrial	302	K.VGC#GSPR.I	1859.93	1524.72	1476.27	1608.22	1581.74	1668.34	1649.66	1494.72	1411.05	1388.57	1399.19	1576.4	1377.94	1448.77	1321.25	1620.31	1619.44	1518.48	1454.72	1382.65	1.00054	1.06706	1.11383	1.17188	MTHFD1L_C302	12.8946	2.74018	7.97305	7.25314	4.62113
sp|Q86Y97|SV422_HUMAN	SUV420H2	SV422_HUMAN Histone-lysine N-methyltransferase SUV420H2	111	R.AFLPESGFTILPC#TR.Y	96.1566	98.7025	102.521	94.4286	93.118	97.0546	81.2049	97.7068	102.61	101.692	110.905	86.2297	92.921	80.4577	80.4394	99.1266	94.8671	93.8406	99.6092	84.606	1.0449	1.05633	0.995155	1.17163	SUV420H2_C111	3.23142	2.11304	11.9501	12.518	8.51116
sp|Q15334|L2GL1_HUMAN	LLGL1	L2GL1_HUMAN Lethal(2) giant larvae protein homolog 1	697	K.LQEANAQLAEQAC#PHDVEMTPVQR.R	247.893	314.554	281.614	272.042	279.246	302.871	201.567	281.218	296.94	282.187	221.363	247.247	248.804	232.566	239.072	281.354	284.72	259.908	250.266	240.147	0.988177	1.08251	1.12422	1.17159	LLGL1_C697	11.8467	5.66409	19.6734	12.1968	3.40315
sp|O95239|KIF4A_HUMAN	KIF4A	KIF4A_HUMAN Chromosome-associated kinesin KIF4A	1224	R.ALASNTSFFSGC#SPIEEEAH.-	147.91	188.206	160.552	156.001	140.799	162.976	147.143	146.391	176.76	152.117	144.662	131.063	140.544	127.984	155.464	165.556	153.259	156.765	142.614	141.33	1.08024	1.05608	1.16087	1.17141	KIF4A_C1224	12.4482	7.39933	11.0488	7.48557	9.7337
sp|P62979|RS27A_HUMAN	RPS27A	RS27A_HUMAN Ubiquitin-40S ribosomal protein S27a	145;149	K.CC#LTYC#FNKPEDK.-	346.48	312.212	321.899	353.511	271.008	282.794	284.632	233.026	273.634	277.059	278.271	227.301	290.877	244.884	301.371	326.864	302.437	263.764	260.877	279.044	1.08077	1.23923	1.25294	1.17137	RPS27A_C145;149	5.40447	14.754	10.3054	11.1485	10.767
sp|P49591|SYSC_HUMAN	SARS	SYSC_HUMAN Serine--tRNA ligase, cytoplasmic	395	R.ELVSC#SNCTDYQAR.R	9.08833	11.6541	9.00631	5.84579	11.3701	8.91268	6.48571	11.7626	12.18	10.0988	9.18774	7.14372	8.38993	8.19279	8.81494	9.91625	8.70951	10.1428	8.81007	8.46589	1.13855	0.977666	1.12556	1.17132	SARS_C395	15.1831	31.7784	31.293	17.1767	3.75574
sp|Q86TB3|ALPK2_HUMAN	ALPK2	ALPK2_HUMAN Alpha-protein kinase 2	1610	R.FPC#TSSPEGNVTDFLISHK.M	151.177	161.001	144.529	153.116	147.563	147.502	133.941	139.938	156.91	148.593	154.707	132.639	132.672	126.661	130.646	152.236	149.394	143.596	145.313	129.993	1.01902	1.06016	1.04764	1.17111	ALPK2_C1610	5.44334	2.15785	8.29661	7.84078	2.35271
sp|Q6IQ49|SDE2_HUMAN	SDE2	SDE2_HUMAN Protein SDE2 homolog	406	K.C#ELMALGLK.C	26.6466	31.1849	30.697	30.8461	28.7164	32.0192	23.5744	23.0118	28.85	28.2395	36.8021	28.7473	23.9315	25.1531	26.5177	29.5095	30.5272	25.1454	31.263	25.2008	0.966662	1.17355	0.943912	1.17098	SDE2_C406	8.44232	5.48458	12.8078	15.3656	5.13376
sp|Q13444|ADA15_HUMAN	ADAM15	ADA15_HUMAN Disintegrin and metalloproteinase domain-containing protein 15	733	K.GPTC#QYR.A	189.187	154.876	161.496	157.924	165.567	167.088	173.79	155.586	152.38	154.231	152.02	158.406	140.228	155.356	136.158	168.52	163.526	160.585	154.886	143.914	1.03053	1.04941	1.08802	1.17097	ADAM15_C733	10.8009	3.00335	7.19082	2.09372	7.02892
sp|Q2NKJ3|CTC1_HUMAN	CTC1	CTC1_HUMAN CST complex subunit CTC1	424	R.RPVLAPC#LR.G	153.86	167.912	150.273	144.473	151.587	160.785	152.038	145.026	166.81	137.05	140.798	137.357	134.833	130.697	137.627	157.348	152.282	154.624	138.401	134.386	1.03327	1.01762	1.1369	1.17087	CTC1_C424	5.92485	5.37053	7.19174	1.50359	2.59452
sp|O75131|CPNE3_HUMAN	CPNE3	CPNE3_HUMAN Copine-3	249	R.SSPVEFEC#INEK.K	15.295	20.5675	29.4752	20.3455	13.1284	16.779	20.5502	18.2157	19.89	23.4906	16.9295	21.542	16.5903	23.6829	15.5294	21.7792	16.751	19.552	20.654	18.6009	1.30018	1.11391	1.05448	1.17087	CPNE3_C249	32.9091	21.5428	6.15484	16.3139	23.8324
sp|Q9NZQ3-2|SPN90_HUMAN	NCKIPSD	SPN90_HUMAN Isoform 2 of NCK-interacting protein with SH3 domain	331	R.NTGLSHELC#R.V	142.742	137.919	139.969	141.359	145.707	155.603	115.395	111.908	137.07	136.495	132.864	123.771	119.594	111.705	127.975	140.21	147.556	121.458	131.043	119.758	0.950214	1.15439	1.06995	1.17078	NCKIPSD_C331	1.7262	4.94703	11.2242	5.00167	6.79358
sp|P30153|2AAA_HUMAN	PPP2R1A	2AAA_HUMAN Serine/threonine-protein phosphatase 2A 65 kDa regulatory subunit A alpha isoform	317	K.EFC#ENLSADC#R.E	32.55	33.1868	32.2086	22.6729	29.1695	29.7171	26.2222	36.6415	22.41	30.458	28.3822	29.6465	25.1572	27.3984	31.1073	32.6485	27.1865	28.4246	29.4956	27.8876	1.20091	1.1486	1.10689	1.17072	PPP2R1A_C317	1.52076	14.4133	25.9175	3.54669	10.7757
sp|Q9ULT8|HECD1_HUMAN	HECTD1	HECD1_HUMAN E3 ubiquitin-protein ligase HECTD1	936	K.QDC#SQLVER.I	103.262	106.388	98.9434	94.2756	102.568	102.065	108.496	107.976	88.3	104.211	92.9267	101.059	92.3145	90.4014	80.8887	102.864	99.6361	101.591	99.399	87.8682	1.0324	1.01254	1.03486	1.17067	HECTD1_C936	3.63428	4.66616	11.3326	5.85777	6.96459
sp|Q9H9E3|COG4_HUMAN	COG4	COG4_HUMAN Conserved oligomeric Golgi complex subunit 4	25	R.C#SEISAELIR.S	116.223	120.986	105.292	106.579	121.274	108.811	95.1237	97.135	109.48	92.7838	90.1115	91.9816	98.5185	82.5962	111.486	114.167	112.221	100.58	91.6256	97.5335	1.01734	1.13509	1.24602	1.17054	COG4_C25	7.04802	7.05623	7.72855	1.49655	14.836
sp|P53350|PLK1_HUMAN	PLK1	PLK1_HUMAN Serine/threonine-protein kinase PLK1	428	K.YGLGYQLC#DNSVGVLFNDSTR.L	115.908	123.667	110.922	117.692	106.624	96.9684	107.864	106.459	111.08	113.351	106.939	109.287	108.488	88.9847	101.967	116.833	107.095	108.468	109.859	99.8131	1.09093	1.07712	1.06348	1.17051	PLK1_C428	5.4971	9.68261	2.18405	2.9531	9.94695
sp|O14628|ZN195_HUMAN	ZNF195	ZN195_HUMAN Zinc finger protein 195	412;415	K.C#EEC#DSIFK.W	27.8734	34.7289	33.3663	28.7644	25.4726	32.0505	23.4785	25.6524	24.5012	27.1483	30.0063	29.1077	24.8736	31.2099	25.9103	31.9895	28.7625	24.544	28.7541	27.3313	1.11219	1.30335	1.11252	1.17044	ZNF195_C412;415	11.3449	11.4349	4.43105	5.08251	12.4354
sp|A8MQ27|NEU1B_HUMAN	NEURL1B	NEU1B_HUMAN E3 ubiquitin-protein ligase NEURL1B	261	R.APGPPPADAAAAAIPC#GPR.E	50.7033	46.2828	44.8552	46.0998	45.5018	54.3747	46.5173	45.0784	41.45	38.3036	40.1292	48.7744	41.7727	39.574	39.8494	47.2804	48.6588	44.3486	42.4024	40.3987	0.971673	1.06611	1.11504	1.17035	NEURL1B_C261	6.44881	10.1917	5.88814	13.191	2.96519
sp|Q7Z6E9|RBBP6_HUMAN	RBBP6	RBBP6_HUMAN E3 ubiquitin-protein ligase RBBP6	161	K.KPLGPPPPSYTC#FR.C	98.8633	107.258	97.7468	80.2566	89.9789	85.9138	80.9863	80.4829	96.71	85.8394	83.3679	82.9657	83.3181	81.9546	94.3782	101.289	85.3831	86.0597	84.0577	86.5503	1.18629	1.17697	1.205	1.1703	RBBP6_C161	5.13309	5.71869	10.7214	1.85121	7.87213
sp|Q5IJ48|CRUM2_HUMAN	CRB2	CRUM2_HUMAN Protein crumbs homolog 2	1098;1103	R.CEAHVDPC#HSAPC#AR.G	31.4496	38.6837	34.5836	29.0331	32.4788	28.4125	41.5022	28.0321	30.0954	32.6484	37.6871	37.0082	32.6482	32.5335	24.306	34.9057	29.9748	33.2099	35.7812	29.8292	1.1645	1.05106	0.97553	1.17018	CRB2_C1098;1103	10.3931	7.30818	21.8462	7.6417	16.0366
sp|Q8IY22|CMIP_HUMAN	CMIP	CMIP_HUMAN C-Maf-inducing protein	363	R.NGCQQPC#DR.K	80.2783	83.1994	78.1596	68.6416	79.0403	84.1534	50.6225	85.6874	84.75	82.0842	54.3715	58.9973	76.7097	60.2898	69.4996	80.5458	77.2784	73.6866	65.151	68.8331	1.04228	1.09309	1.23629	1.17016	CMIP_C363	3.14172	10.2287	27.1143	22.7868	11.9568
sp|Q8IWR1|TRI59_HUMAN	TRIM59	TRI59_HUMAN Tripartite motif-containing protein 59	314	R.MSC#SWPGK.D	29.8083	27.8007	35.0427	29.2289	29.9678	31.5021	33.716	34.7511	22.68	29.9958	31.8628	28.1931	28.7203	23.5894	26.8698	30.8839	30.2329	30.3823	30.0172	26.3932	1.02153	1.01651	1.02887	1.17015	TRIM59_C314	12.1064	3.83542	22.0209	6.11297	9.84531
sp|O60879-2|DIAP2_HUMAN	DIAPH2	DIAP2_HUMAN Isoform 2 of Protein diaphanous homolog 2	655	K.IEPTELSENC#FWLR.V	170.765	197.143	191.173	200.92	171.867	196.781	149.329	176.754	219.27	183.222	182.757	133.526	162.618	152.656	162.53	186.36	189.856	181.784	166.502	159.268	0.981588	1.02517	1.11927	1.1701	DIAPH2_C655	7.42212	8.2777	19.386	17.1521	3.59548
tr|B3V0L1|B3V0L1_HUMAN	ARL6IP4	B3V0L1_HUMAN ADP-ribosylation factor-like protein 6-interacting protein 4	36;48	R.NC#SASTSQASPSPC#ITER.S	54.6714	46.6033	42.2747	47.5306	51.6792	43.6768	38.764	45.8887	57.2419	51.534	35.4134	39.4959	50.8029	38.8043	33.0744	47.8498	47.6289	47.2982	42.1477	40.8939	1.00464	1.01166	1.13529	1.1701	ARL6IP4_C36;48	13.1487	8.40276	19.7032	19.885	22.1233
sp|Q8NFQ8|TOIP2_HUMAN	TOR1AIP2	TOIP2_HUMAN Torsin-1A-interacting protein 2	47	K.DLENDPSVNSQAQETTIIASNAEEAEILHSAC#GLSK.D	50.5516	51.812	47.4752	48.8861	55.1459	47.4071	46.6145	52.255	57.33	51.395	57.3914	54.1691	46.1699	39.8413	42.047	49.9463	50.4797	52.0665	54.3185	42.6861	0.989433	0.959279	0.919507	1.17008	TOR1AIP2_C47	4.4665	8.13828	10.295	5.52475	7.52547
sp|Q8IVL1|NAV2_HUMAN	NAV2	NAV2_HUMAN Neuron navigator 2	1965	K.SESQGSGC#SR.A	112.082	116.553	110.028	102.919	97.6812	123.042	97.6864	107.696	119.55	102.189	89.1646	109.324	85.9083	103.873	99.672	112.888	107.881	108.311	100.226	96.4846	1.04641	1.04226	1.12633	1.17001	NAV2_C1965	2.95543	12.4106	10.105	10.1989	9.73948
sp|O15118|NPC1_HUMAN	NPC1	NPC1_HUMAN Niemann-Pick C1 protein	799;800	R.LDIFC#C#VR.G	423.371	372.448	387.361	378.636	398.575	377.651	311.091	345.281	343.804	361.231	390.628	367.148	344.49	336.228	330.813	394.393	384.954	333.392	373.002	337.177	1.02452	1.18297	1.05735	1.16969	NPC1_C799;800	6.63805	3.06687	5.79718	4.1685	2.04268
sp|O43592|XPOT_HUMAN	XPOT	XPOT_HUMAN Exportin-T	522	K.FFTVEPQHIPC#VLMAFLDHR.G	45.4183	42.4577	45.1071	45.7501	43.97	53.3776	40.5296	43.5847	49.74	48.8877	77.6863	41.0025	38.6013	33.68	41.4157	44.3277	47.6992	44.6181	55.8588	37.899	0.929317	0.993491	0.793567	1.16963	XPOT_C522	3.67026	10.4771	10.5145	34.5691	10.3311
sp|Q9UQ35|SRRM2_HUMAN	SRRM2	SRRM2_HUMAN Serine/arginine repetitive matrix protein 2	956	R.SVSPC#SNVESR.L	100.998	99.1553	61.4822	97.0838	101.176	94.0878	96.8119	89.7366	85.73	97.267	92.9651	102.808	88.208	54.2355	81.3015	87.2119	97.4493	90.7595	97.68	74.5816	0.894947	0.960912	0.892833	1.16935	SRRM2_C956	25.5718	3.65151	6.18262	5.05166	24.075
sp|Q9C000|NALP1_HUMAN	NLRP1	NALP1_HUMAN NACHT, LRR and PYD domains-containing protein 1	264	R.ESLC#STWPWK.N	134.633	129.935	123.015	114.009	118.674	121.392	123.617	103.005	124.63	108.694	122.78	108.683	101.741	114.592	115.129	129.194	118.025	117.084	113.386	110.487	1.09464	1.10343	1.13942	1.16932	NLRP1_C264	4.52382	3.1637	10.4229	7.17532	6.86005
sp|Q07912-3|ACK1_HUMAN	TNK2	ACK1_HUMAN Isoform 3 of Activated CDC42 kinase 1	921	R.AGPC#ILPIVR.D	57.2716	41.5282	36.3401	42.6579	40.367	37.8666	46.3473	39.8272	43.07	35.0914	42.8804	48.8729	41.1662	40.2155	34.1913	45.0467	40.2971	43.0815	42.2816	38.5244	1.11786	1.04561	1.0654	1.1693	TNK2_C921	24.1978	5.94685	7.56719	16.3434	9.81852
sp|Q86UK7|ZN598_HUMAN	ZNF598	ZN598_HUMAN Zinc finger protein 598	32;33	R.GGGSCVLC#C#GDLEATALGR.C	14.7397	15.7699	14.5868	12.6273	14.0501	11.5746	11.8793	10.7945	9.65647	12.6553	18.0418	10.1647	12.1776	12.9185	13.4712	15.0322	12.7507	10.7768	13.6206	12.8558	1.17893	1.39487	1.10363	1.16929	ZNF598_C32;33	4.28074	9.74326	10.3142	29.5605	5.04875
sp|Q9Y546|LRC42_HUMAN	LRRC42	LRC42_HUMAN Leucine-rich repeat-containing protein 42	56	K.GFSVELC#MNR.E	54.39	53.9569	55.0581	56.207	51.9528	59.5081	52.5779	51.7999	45.12	46.0106	45.7851	54.982	49.771	44.372	45.6046	54.4683	55.8893	49.8326	48.9259	46.5825	0.974575	1.09303	1.11328	1.16929	LRRC42_C56	1.01856	6.77708	8.22701	10.7223	6.07353
sp|Q9C0D5|TANC1_HUMAN	TANC1	TANC1_HUMAN Protein TANC1	1808	K.C#QIPVHSQENR.I	36.68	35.2245	32.4101	34.0148	33.5061	36.4878	28.7849	30.7719	30.43	36.478	28.9068	34.8318	29.8196	27.2781	32.1151	34.7715	34.6696	29.9956	33.4055	29.7376	1.00294	1.15922	1.04089	1.16928	TANC1_C1808	6.24268	4.6007	3.54166	11.9202	8.13621
sp|Q9Y219|JAG2_HUMAN	JAG2	JAG2_HUMAN Protein jagged-2	813;824	R.C#ECAPGFAGPDC#R.I	44.2016	61.6339	40.4074	33.8814	29.7754	35.8913	43.4985	41.6723	31.9321	41.0061	28.0664	39.1281	40.503	47.7714	36.7972	48.7476	33.1827	39.0343	36.0669	41.6905	1.46907	1.24884	1.35159	1.16927	JAG2_C813;824	23.2215	9.39427	15.9298	19.3861	13.3907
sp|Q9Y4A5|TRRAP_HUMAN	TRRAP	TRRAP_HUMAN Transformation/transcription domain-associated protein	555	K.TLVC#GVK.T	209.533	207.546	210.055	215.212	207.509	213.424	194.413	190.862	205.79	196.856	182.603	202.562	182.948	178.464	175.145	209.045	212.049	197.022	194.007	178.853	0.985834	1.06102	1.07751	1.16881	TRRAP_C555	0.633348	1.90128	3.95802	5.29865	2.18952
sp|Q8TCY9|URGCP_HUMAN	URGCP	URGCP_HUMAN Up-regulator of cell proliferation	868	R.ALAGLAFC#DPEK.Q	173.472	171.725	165.439	156.776	168.868	185.714	158.341	159.496	164.62	162.863	151.009	149.735	151.448	136.858	148.591	170.212	170.453	160.819	154.536	145.633	0.998588	1.05841	1.10144	1.16878	URGCP_C868	2.48206	8.52644	2.07818	4.68472	5.30917
sp|Q03169|TNAP2_HUMAN	TNFAIP2	TNAP2_HUMAN Tumor necrosis factor alpha-induced protein 2	45	K.GLANVFC#VFTK.G	241.068	184.476	166.069	228.488	204.445	203.674	209.352	148.701	181.62	199.179	270.373	206.737	175.67	152.749	177.804	197.204	212.203	179.891	225.43	168.741	0.92932	1.09624	0.874793	1.16868	TNFAIP2_C45	19.8202	6.64884	16.8782	17.3469	8.23185
sp|Q9HCU5|PREB_HUMAN	PREB	PREB_HUMAN Prolactin regulatory element-binding protein	128	K.C#GAETQHEGLELR.V	47.355	48.3443	46.3038	43.8489	48.3929	46.1022	46.3716	37.0733	45.54	50.0778	40.206	44.4019	41.8486	40.8303	38.8295	47.3343	46.1146	42.9949	44.8952	40.5028	1.02645	1.10093	1.05433	1.16867	PREB_C128	2.15581	4.92696	11.9669	11.0354	3.79224
sp|P48637|GSHB_HUMAN	GSS	GSHB_HUMAN Glutathione synthetase	409	K.IEPEPFENC#LLR.P	6.55666	12.7623	10.7824	11.6697	12.0928	8.97423	12.5585	15.2051	8.61	12.9412	11.3503	10.2845	8.26357	12.0553	5.43953	10.0338	10.9123	12.1245	11.5253	8.58613	0.919497	0.827563	0.870585	1.1686	GSS_C409	31.5916	15.5024	27.3733	11.6003	38.663
sp|Q9P206-2|K1522_HUMAN	KIAA1522	K1522_HUMAN Isoform 2 of Uncharacterized protein KIAA1522	863	K.EPVGC#SK.G	94.0216	109.403	109.6	106.437	104.887	108.639	93.1925	101.838	106.59	108.729	87.0404	86.6731	81.8018	83.2377	102.853	104.342	106.654	100.54	94.1475	89.2975	0.978316	1.03781	1.10828	1.16847	KIAA1522_C863	8.566	1.76748	6.75585	13.4145	13.1711
sp|Q9H7E9-2|CH033_HUMAN	C8orf33	CH033_HUMAN Isoform 2 of UPF0488 protein C8orf33	44;50	R.NPSTVCLC#PEQPTC#SNADSR.A	121.461	117.317	125.098	126.885	112.235	116.697	102.786	120.949	115.822	117.63	95.2734	108.112	106.954	95.81	108.685	121.292	118.606	113.185	107.005	103.816	1.02265	1.07162	1.13351	1.16833	C8orf33_C44;50	3.21019	6.33112	8.27289	10.4849	6.73048
sp|Q3V6T2|GRDN_HUMAN	CCDC88A	GRDN_HUMAN Girdin	1729	K.DKPVSC#GLAR.S	294.723	275.433	258.5	265.3	259.678	290.216	245.679	245.16	268.99	250.447	236.962	253.282	244.218	235.359	229.796	276.219	271.731	253.276	246.897	236.457	1.01651	1.09058	1.11876	1.16815	CCDC88A_C1729	6.56161	5.98132	5.37393	3.53184	3.07603
sp|Q86Y56|HEAT2_HUMAN	HEATR2	HEAT2_HUMAN HEAT repeat-containing protein 2	92	R.C#LSDPAEGC#R.A	53.4216	53.2896	64.1274	49.0172	45.8039	47.0993	44.7684	60.4351	53.23	48.0326	40.6154	52.6665	46.8522	47.4059	51.9912	56.9462	47.3068	52.8112	47.1049	48.7498	1.20376	1.0783	1.20892	1.16813	HEATR2_C92	10.9217	3.41741	14.8487	12.905	5.78622
sp|Q15649|ZNHI3_HUMAN	ZNHIT3	ZNHI3_HUMAN Zinc finger HIT domain-containing protein 3	30;34	R.VPYC#SVVC#FR.K	90.3191	85.4578	85.5044	84.5958	82.5347	75.9088	80.0006	70.6977	80.5286	75.9642	100.846	81.3865	78.2032	74.8234	70.6521	87.0938	81.0131	77.0756	86.0655	74.5596	1.07506	1.12998	1.01195	1.16811	ZNHIT3_C30;34	3.20728	5.60279	7.17444	15.2024	5.07304
sp|Q14699|RFTN1_HUMAN	RFTN1	RFTN1_HUMAN Raftlin	494	K.AGDMGNC#VSGQQQEGGVSEEMK.G	19.985	25.5008	24.0462	18.4115	22.4165	24.6207	22.5056	20.3745	21.74	24.0336	19.3736	18.6353	20.7727	17.7355	21.0175	23.1773	21.8162	21.5401	20.6808	19.8419	1.06239	1.07601	1.12072	1.1681	RFTN1_C494	12.3341	14.4287	5.01173	14.1532	9.21435
sp|Q12931|TRAP1_HUMAN	TRAP1	TRAP1_HUMAN Heat shock protein 75 kDa, mitochondrial	501	R.NIYYLC#APNR.H	12.9617	14.3949	14.0448	10.588	9.07232	10.0575	8.55044	19.4877	8.57	12.5021	9.53324	12.7479	11.1192	11.4539	12.8703	13.8004	9.90594	12.2027	11.5944	11.8145	1.39315	1.13093	1.19027	1.1681	TRAP1_C501	5.41428	7.76417	51.7014	15.432	7.86818
sp|Q6ZN30|BNC2_HUMAN	BNC2	BNC2_HUMAN Zinc finger protein basonuclin-2	863;868	K.EMHVC#TVAGC#NAAFPSR.R	79.5208	77.8626	79.2737	73.9813	78.2166	76.8343	69.45	54.0397	73.6507	69.5198	77.818	65.7591	65.8344	70.8939	65.9126	78.8857	76.3441	65.7135	71.0323	67.547	1.03329	1.20045	1.11056	1.16786	BNC2_C863;868	1.13403	2.82899	15.7131	8.68632	4.29156
sp|P05107|ITB2_HUMAN	ITGB2	ITB2_HUMAN Integrin beta-2	286	R.C#HLEDNLYK.R	11.2233	13.7752	9.90064	7.61591	12.2978	10.4145	11.4168	8.6936	9.95	8.31934	8.91902	10.9496	11.3213	9.18181	9.38561	11.6331	10.1094	10.0201	9.39599	9.96292	1.15072	1.16097	1.23809	1.16764	ITGB2_C286	16.9303	23.3031	13.6021	14.6709	11.8523
sp|Q15149-6|PLEC_HUMAN	PLEC	PLEC_HUMAN Isoform 6 of Plectin	2875	R.C#VEDPETGLCLLPLTDK.A	115.803	125.002	112.925	118.227	113.862	127.633	107.767	118.7	111.56	108.902	120.733	95.7628	102.183	103.071	97.6929	117.91	119.908	112.676	108.466	100.982	0.983341	1.04646	1.08707	1.16763	PLEC_C2875	5.34973	5.86922	4.92656	11.5159	2.85516
sp|P22234|PUR6_HUMAN	PAICS	PUR6_HUMAN Multifunctional protein ADE2	81;91	K.C#GETAFIAPQC#EMIPIEWVCR.R	57.0066	60.1107	89.4094	77.2093	58.8507	80.7534	49.1678	79.0531	72.8921	68.5153	55.6618	48.2706	57.9369	57.2382	61.7065	68.8422	72.2711	67.0377	57.4826	58.9605	0.952555	1.02692	1.19762	1.1676	PAICS_C81;91	25.9712	16.2675	23.5381	17.8219	4.07658
sp|Q8NB46|ANR52_HUMAN	ANKRD52	ANR52_HUMAN Serine/threonine-protein phosphatase 6 regulatory ankyrin repeat subunit C	1049;1058	K.TVGGC#GALPHGASC#PYSQER.P	29.1885	30.9449	25.9029	31.3244	27.4638	30.0936	26.5815	27.8754	32.1485	28.9171	25.6595	20.6448	31.7965	19.9228	21.9757	28.6788	29.6273	28.8685	25.0738	24.565	0.967986	0.993429	1.14377	1.16747	ANKRD52_C1049;1058	8.92419	6.65651	10.0917	16.6194	25.8344
sp|Q12933|TRAF2_HUMAN	TRAF2	TRAF2_HUMAN TNF receptor-associated factor 2	49	R.RPFQAQC#GHR.Y	27.16	27.8245	24.9154	25.6559	20.4208	26.2579	21.364	20.7129	17.81	27.2458	33.7182	26.4687	22.5795	27.2781	18.5891	26.6333	24.1115	19.9623	29.1443	22.8156	1.10459	1.33418	0.913843	1.16733	TRAF2_C49	5.72373	13.3148	9.47865	13.6568	19.0629
sp|Q12841|FSTL1_HUMAN	FSTL1	FSTL1_HUMAN Follistatin-related protein 1	77	K.TYLNHC#ELHR.D	298.806	327.555	300.496	281.483	279.063	266.469	303.346	257.121	305.91	307.584	271.614	301.293	273.077	270.429	250.522	308.952	275.672	288.792	293.497	264.676	1.12073	1.06981	1.05266	1.16729	FSTL1_C77	5.22157	2.92406	9.50803	6.54539	4.65822
sp|Q9NVR2|INT10_HUMAN	INTS10	INT10_HUMAN Integrator complex subunit 10	122	K.VTEQC#FNTLER.S	149.788	169.354	147.426	137.731	156.409	150.297	164.122	159.764	145.46	156.427	150.574	166.19	132.255	140.667	126.785	155.523	148.145	156.449	157.73	133.236	1.0498	0.994082	0.986005	1.16728	INTS10_C122	7.73921	6.42798	6.2403	5.00173	5.24869
sp|Q9Y2T2|AP3M1_HUMAN	AP3M1	AP3M1_HUMAN AP-3 complex subunit mu-1	288	K.HSISFKENSSC#GR.F	62.51	66.886	78.5123	79.6447	64.8331	70.9198	66.6789	69.3271	71.47	63.978	171.982	88.3482	55.5706	59.6617	62.8824	69.3028	71.7992	69.1587	108.103	59.3716	0.96523	1.00208	0.641082	1.16727	AP3M1_C288	11.9337	10.369	3.47028	52.4013	6.17212
sp|Q96C01|F136A_HUMAN	FAM136A	F136A_HUMAN Protein FAM136A	35;40	R.C#SASCC#EDSQASMK.Q	52.9447	62.8849	47.3517	40.2203	55.1777	51.6466	50.9226	48.9997	62.878	46.0254	45.728	53.2257	49.2723	45.4325	45.0928	54.3938	49.0149	54.2667	48.3264	46.5992	1.10974	1.00234	1.12555	1.16727	FAM136A_C35;40	14.4638	15.9508	13.8561	8.78521	4.98124
sp|Q9NS15|LTBP3_HUMAN	LTBP3	LTBP3_HUMAN Latent-transforming growth factor beta-binding protein 3	658;664	R.SC#VDLNEC#AK.P	103.321	118.709	99.5533	106.116	95.5414	118.776	124.593	112.149	110.358	121.266	117.419	115.688	108.212	83.4511	83.8629	107.195	106.811	115.7	118.124	91.842	1.00359	0.926488	0.907472	1.16716	LTBP3_C658;664	9.4671	10.8912	6.70121	2.41684	15.4377
sp|O95782|AP2A1_HUMAN	AP2A1	AP2A1_HUMAN AP-2 complex subunit alpha-1	225	K.TC#VSLAVSR.L	28.2333	36.8451	38.7838	34.3426	33.0422	38.3836	32.2221	39.8972	33.14	38.6272	33.04	31.8019	31.9171	25.3803	31.7022	34.6207	35.2562	35.0864	34.4897	29.6665	0.981977	0.986728	1.0038	1.167	AP2A1_C225	16.2214	7.90045	11.9461	10.543	12.5177
sp|Q9HBH1|DEFM_HUMAN	PDF	DEFM_HUMAN Peptide deformylase, mitochondrial	108	R.C#VGLSAPQLGVPR.Q	50.7966	50.1794	45.5228	44.7449	39.7737	48.8104	37.1896	49.2093	40.23	41.9202	52.8615	41.2735	45.854	38.4513	41.2457	48.8329	44.443	42.2096	45.3517	41.8503	1.09878	1.15692	1.07676	1.16685	PDF_C108	5.9043	10.1837	14.8061	14.3582	8.93229
sp|Q9P273|TEN3_HUMAN	TENM3	TEN3_HUMAN Teneurin-3	564;566	R.C#LC#FSGWK.G	73.7333	58.7807	51.506	48.9595	47.1449	35.7535	70.4708	40.0708	39.6586	75.4717	60.4277	97.8503	59.537	41.4766	56.6969	61.34	43.9526	50.0667	77.9166	52.5702	1.39559	1.22516	0.787252	1.16682	TENM3_C564;566	18.4749	16.2866	35.2962	24.1678	18.4737
sp|Q8TBC4|UBA3_HUMAN	UBA3	UBA3_HUMAN NEDD8-activating enzyme E1 catalytic subunit	28	K.MAVDGGC#GDTGDWEGR.W	23.66	26.7759	22.711	23.1865	23.6894	24.9777	16.4329	21.6932	26.9	24.5305	25.1575	20.8523	19.3069	19.807	23.5794	24.3823	23.9512	21.6753	23.5134	20.8978	1.018	1.12489	1.03695	1.16674	UBA3_C28	8.72154	3.85715	24.1453	9.89158	11.177
sp|Q13085-4|ACACA_HUMAN	ACACA	ACACA_HUMAN Isoform 4 of Acetyl-CoA carboxylase 1	1086	K.NLLVTMLIDQLC#GR.D	104.673	120.843	128.519	103.05	108.048	130.551	98.2086	110.333	113.25	103.426	150.907	108.388	98.329	99.9039	105.221	118.012	113.883	107.264	120.907	101.151	1.03626	1.1002	0.976058	1.16669	ACACA_C1086	10.3147	12.8638	7.43636	21.5861	3.57017
sp|O75691|UTP20_HUMAN	UTP20	UTP20_HUMAN Small subunit processome component 20 homolog	1794	K.C#LASTTK.R	70.5716	65.1939	62.5277	58.5016	60.626	56.9476	54.8734	71.3809	60.43	61.4245	60.6928	61.0912	50.5544	57.1357	62.2753	66.0978	58.6917	62.2281	61.0695	56.6551	1.12619	1.06218	1.08234	1.16667	UTP20_C1794	6.19902	3.14621	13.4977	0.599805	10.3701
sp|P17936-2|IBP3_HUMAN	IGFBP3	IBP3_HUMAN Isoform 2 of Insulin-like growth factor-binding protein 3	40	R.C#EPC#DAR.A	115.08	115.862	99.5228	137.687	112.525	93.6816	81.545	133.053	118.67	94.9214	85.6072	97.6719	111.154	67.9881	104.116	110.155	114.631	111.089	92.7335	94.4193	0.96095	0.991589	1.18787	1.16666	IGFBP3_C40	8.36633	19.2604	23.9245	6.81839	24.5278
sp|Q6AWC2-6|WWC2_HUMAN	WWC2	WWC2_HUMAN Isoform 6 of Protein WWC2	523	K.SPSQPGQSGLC#GVAAAATGHTPPLAEAPK.S	30.1933	37.858	25.9986	28.8028	28.1878	35.3429	31.7848	34.6577	26.6	32.353	24.7608	27.5157	29.4658	21.598	29.5531	31.35	30.7779	31.0142	28.2098	26.8723	1.01859	1.01083	1.11131	1.16663	WWC2_C523	19.1825	12.884	13.1674	13.6243	16.9987
sp|Q96RE7|NACC1_HUMAN	NACC1	NACC1_HUMAN Nucleus accumbens-associated protein 1	178	K.TEQQESDSVQC#MPVAK.R	36.995	38.7279	30.823	27.5681	32.1037	30.4804	40.3353	25.7891	30.75	33.6702	30.2121	31.3339	33.1048	27.1445	31.083	35.5153	30.0507	32.2914	31.7387	30.4441	1.18184	1.09984	1.11899	1.16657	NACC1_C178	11.6992	7.64755	22.8995	5.55874	9.95633
sp|Q9H7F0|AT133_HUMAN	ATP13A3	AT133_HUMAN Probable cation-transporting ATPase 13A3	1220	K.ENGSC#QIITIT.-	58.9633	62.2029	53.3073	53.8249	53.0639	52.8605	54.084	50.7263	58.34	52.123	50.507	60.5985	48.4822	52.9792	48.1179	58.1578	53.2498	54.3834	54.4095	49.8598	1.09217	1.0694	1.06889	1.16643	ATP13A3_C1220	7.74136	0.954677	7.01625	9.96223	5.43045
sp|Q15154|PCM1_HUMAN	PCM1	PCM1_HUMAN Pericentriolar material 1 protein	957	K.NNC#PFSADENYRPLAK.T	105.758	106.925	107.32	98.6791	110.745	101.991	98.9131	93.6225	103.41	97.1861	105.403	101.466	91.9481	80.4444	102.015	106.668	103.805	98.6485	101.352	91.4693	1.02758	1.08129	1.05245	1.16616	PCM1_C957	0.761194	6.00558	4.96622	4.05489	11.8001
sp|Q8TEA7|TBCK_HUMAN	TBCK	TBCK_HUMAN TBC domain-containing protein kinase-like protein	737	R.SSAPYFSAEC#PDPPK.T	22.1083	23.773	25.5452	21.6458	26.6237	29.5571	21.4611	24.0504	27.39	24.1954	20.5125	23.9068	18.8647	20.3015	22.0859	23.8088	25.9422	24.3005	22.8716	20.4174	0.917765	0.979767	1.04098	1.1661	TBCK_C737	7.21876	15.4167	12.2316	8.95495	7.90372
sp|O75820|ZN189_HUMAN	ZNF189	ZN189_HUMAN Zinc finger protein 189	525	K.SFSQLC#NLIR.H	140.268	131.675	129.036	128.815	120.788	145.877	131.852	121.174	121.27	133.213	139.019	120.827	109.094	129.454	105.33	133.66	131.827	124.765	131.02	114.626	1.0139	1.07129	1.02015	1.16605	ZNF189_C525	4.39427	9.71952	4.91913	7.09204	11.3225
sp|Q9UIG8|SO3A1_HUMAN	SLCO3A1	SO3A1_HUMAN Solute carrier organic anion transporter family member 3A1	331	R.HPLEPDSSASC#FQQLR.V	12.2383	15.0622	16.9923	15.6798	19.2126	15.7449	11.1374	15.6485	13.48	13.3687	15.1892	11.43	10.5632	12.5364	14.8858	14.7643	16.8791	13.422	13.3293	12.6618	0.874707	1.10001	1.10766	1.16605	SLCO3A1_C331	16.1942	11.9742	16.8089	14.1038	17.091
sp|P07942|LAMB1_HUMAN	LAMB1	LAMB1_HUMAN Laminin subunit beta-1	1025	R.FGYYGDALQQDC#R.K	43.295	42.7318	52.0476	43.237	49.9571	45.302	39.0964	39.8505	48.01	40.0946	37.4803	36.5931	42.5182	33.5196	42.3749	46.0248	46.1654	42.319	38.056	39.4709	0.996955	1.08757	1.2094	1.16604	LAMB1_C1025	11.3494	7.45635	11.6803	4.78333	13.0589
sp|Q9UMN6|KMT2B_HUMAN	KMT2B	KMT2B_HUMAN Histone-lysine N-methyltransferase 2B	1749	R.IDSLGTLSDLSDC#EGR.L	8.95999	9.60452	8.59063	8.16225	10.0216	6.06899	7.70026	7.72505	8.15	8.49266	7.16593	11.5162	7.29065	10.1976	5.80378	9.05171	8.08429	7.85844	9.05825	7.76399	1.11967	1.15185	0.999278	1.16586	KMT2B_C1749	5.66884	24.4607	3.21699	24.614	28.7842
sp|Q9ULP9|TBC24_HUMAN	TBC1D24	TBC24_HUMAN TBC1 domain family member 24	223	R.WLFGELPLC#YFAR.V	88.2583	97.7134	101.5	98.5698	88.9433	89.4099	76.7718	70.2023	82.69	82.2459	158.853	76.2038	85.8072	75.8735	84.944	95.8241	92.3077	76.5547	105.768	82.2083	1.03809	1.25171	0.905986	1.16563	TBC1D24_C223	7.1175	5.88054	8.15976	43.5602	6.69397
sp|Q9BU23|LMF2_HUMAN	LMF2	LMF2_HUMAN Lipase maturation factor 2	659	R.FVQALLAPC#SLR.S	274.505	275.23	297.737	266	280.843	303.474	259.574	302.467	288.49	286.393	318.935	241.101	234.375	229.091	263.671	282.491	283.439	283.51	282.143	242.379	0.996655	0.996403	1.00123	1.16549	LMF2_C659	4.67584	6.6581	7.7161	13.855	7.68551
sp|Q6P087|RUSD3_HUMAN	RPUSD3	RUSD3_HUMAN RNA pseudouridylate synthase domain-containing protein 3	147	K.ESSGLVLLSSC#PQTASR.L	30.1583	35.7131	26.3891	30.2014	34.272	27.0335	21.2304	29.1965	28.9	26.1944	20.2693	22.9215	17.4495	26.8905	34.8227	30.7535	30.5023	26.4423	23.1284	26.3876	1.00824	1.16304	1.32969	1.16545	RPUSD3_C147	15.2516	11.8963	17.0791	12.8324	32.9605
sp|Q9Y520-7|PRC2C_HUMAN	PRRC2C	PRC2C_HUMAN Isoform 7 of Protein PRRC2C	179	K.ETNDDNYGPGPSLRPPNVAC#WR.D	145.32	122.654	86.2842	128.64	134.629	128.323	128.706	122.994	110.03	136.934	103.304	120.951	119.569	82.262	102.137	118.086	130.53	120.577	120.396	101.323	0.904663	0.979344	0.980811	1.16545	PRRC2C_C179	25.2204	2.72162	7.9367	13.9719	18.4232
sp|Q5C9Z4|NOM1_HUMAN	NOM1	NOM1_HUMAN Nucleolar MIF4G domain-containing protein 1	661	R.NIFC#TIMTSEDFLDAFEK.L	57.33	52.0384	75.1491	60.381	59.4286	61.5393	52.0314	65.1962	62.99	58.0043	60.7696	50.3756	55.4569	53.9815	48.895	61.5058	60.4496	60.0725	56.3832	52.7778	1.01747	1.02386	1.09085	1.16537	NOM1_C661	19.686	1.74865	11.7369	9.54773	6.52277
sp|Q9NS15|LTBP3_HUMAN	LTBP3	LTBP3_HUMAN Latent-transforming growth factor beta-binding protein 3	658	R.SC#VDLNEC#AK.P	9.88166	10.3314	10.14	8.0202	7.74545	10.5869	11.7569	7.09491	9.29	10.5147	8.25361	8.4493	10.2726	9.56939	6.20446	10.1177	8.78418	9.38059	9.07254	8.68215	1.15181	1.07858	1.1152	1.16534	LTBP3_C658	2.23076	17.8414	24.863	13.8086	25.0441
sp|P08574|CY1_HUMAN	CYC1	CY1_HUMAN Cytochrome c1, heme protein, mitochondrial	271	K.DVC#TFLR.W	36.0033	43.6136	41.8825	37.9484	32.4381	36.2785	40.5417	29.85	38.41	43.041	36.8661	33.2922	36.1879	33.3726	34.7013	40.4998	35.555	36.2672	37.7331	34.7539	1.13907	1.1167	1.07332	1.16533	CYC1_C271	9.84967	7.94684	15.603	13.0705	4.05246
sp|Q5FYB1|ARSI_HUMAN	ARSI	ARSI_HUMAN Arylsulfatase I	269	K.YAAMVTC#MDEAVR.N	31.57	25.6438	29.3618	31.5891	28.6193	28.6338	27.6918	29.955	33.67	30.7238	23.5708	26.6658	23.6662	24.3645	26.2627	28.8585	29.6141	30.4389	26.9868	24.7645	0.974487	0.94808	1.06936	1.16532	ARSI_C269	10.3781	5.77572	9.91608	13.2928	5.42582
sp|Q13077|TRAF1_HUMAN	TRAF1	TRAF1_HUMAN TNF receptor-associated factor 1	37	R.ALC#CAGCLSENPR.N	23.1117	31.447	32.9769	26.6174	32.0282	25.0761	19.2628	25.4973	23.76	28.54	20.7684	26.789	24.0326	25.9015	25.1942	29.1785	27.9073	22.84	25.3658	25.0428	1.04555	1.27752	1.15031	1.16515	TRAF1_C37	18.1965	13.083	14.087	16.0712	3.76802
sp|A6NKZ8|YI016_HUMAN		YI016_HUMAN Putative tubulin beta chain-like protein ENSP00000290377	282	K.TAIC#DIPPR.G	58.765	70.8184	65.4122	58.5781	43.5169	45.9668	55.2135	75.7452	87.56	82.3615	75.6261	70.8091	54.2692	63.8182	49.2714	64.9985	49.3539	72.8396	76.2656	55.7863	1.31699	0.892352	0.852266	1.16513	_C282	9.28846	16.375	22.4711	7.60852	13.249
sp|Q9UG56|PISD_HUMAN	PISD	PISD_HUMAN Phosphatidylserine decarboxylase proenzyme	224;236	R.MC#TEDLPFPPAASC#DSFK.N	680.986	659.47	617.784	618.46	633.546	672.78	612.643	604.689	630.342	622.549	601.401	631.249	582.609	545.37	552.904	652.746	641.595	615.891	618.4	560.294	1.01738	1.05984	1.05554	1.16501	PISD_C224;236	4.92274	4.37041	2.13211	2.48232	3.51394
sp|Q14517|FAT1_HUMAN	FAT1	FAT1_HUMAN Protocadherin Fat 1	3738;3743	K.LC#AGLDC#PWK.F	137.917	113.078	106.84	99.5743	120.155	104.165	108.621	94.1932	98.6427	115.446	99.9397	113.909	115.136	98.1595	93.9013	119.279	107.965	100.486	109.765	102.399	1.10479	1.18702	1.08667	1.16484	FAT1_C3738;3743	13.7829	10.007	7.3527	7.78342	10.9709
sp|Q96RT8|GCP5_HUMAN	TUBGCP5	GCP5_HUMAN Gamma-tubulin complex component 5	203	K.LDPC#ISWK.D	65.73	60.5347	64.2282	57.2778	62.9129	71.9046	62.598	59.3149	53.88	52.6198	55.0753	53.0483	49.4045	57.6436	56.4958	63.4976	64.0318	58.5976	53.5811	54.5146	0.991658	1.08362	1.18507	1.16478	TUBGCP5_C203	4.21054	11.5213	7.51401	2.44781	8.18591
sp|Q9NQS1|AVEN_HUMAN	AVEN	AVEN_HUMAN Cell death regulator Aven	169	K.EWDSEASC#PK.Q	116.748	120.974	120.37	107.781	129.148	120.838	136.71	130.661	117.7	126.743	121.13	122.65	96.7874	109.848	100.862	119.364	119.256	128.357	123.508	102.499	1.00091	0.929938	0.96645	1.16454	AVEN_C169	1.91459	9.03204	7.56649	2.35054	6.51927
sp|Q9UGK8|SRGEF_HUMAN	SERGEF	SRGEF_HUMAN Secretion-regulating guanine nucleotide exchange factor	157	K.VVC#IAAGLR.H	13.3817	13.0602	11.5382	8.36985	11.4132	10.5376	9.27917	10.8641	12.48	10.7689	15.6243	14.6077	10.8159	9.59612	12.2025	12.66	10.1069	10.8744	13.667	10.8715	1.25261	1.1642	0.926323	1.16451	SERGEF_C157	7.77855	15.5016	14.7175	18.7366	11.9954
sp|P27448-7|MARK3_HUMAN	MARK3	MARK3_HUMAN Isoform 6 of MAP/microtubule affinity-regulating kinase 3	517	R.NTYVC#SER.T	207.853	239.279	217.159	200.964	216.15	214.692	170.28	192.438	238.85	214.685	180.62	169.097	193.385	175.764	201.311	221.43	210.602	200.523	188.134	190.153	1.05142	1.10427	1.17698	1.16448	MARK3_C517	7.29002	3.97839	17.4507	12.6	6.87682
sp|P31040|DHSA_HUMAN	SDHA	DHSA_HUMAN Succinate dehydrogenase [ubiquinone] flavoprotein subunit, mitochondrial	467	R.AC#ALSIEESC#R.P	38.7683	37.2145	40.3331	36.4078	38.1232	31.933	25.1291	32.1138	32.01	32.457	32.2083	34.5485	32.9027	37.5425	29.4439	38.772	35.488	29.751	33.0713	33.2963	1.09254	1.30322	1.17238	1.16445	SDHA_C467	4.02175	9.00574	13.4551	3.88669	12.2045
sp|Q96DY7|MTBP_HUMAN	MTBP	MTBP_HUMAN Mdm2-binding protein	789;797	R.SLPVTC#PLVPIPSC#ETPK.L	75.4167	69.8846	62.0237	73.2701	70.9169	72.3353	62.1267	70.0616	62.3672	63.4884	59.9034	67.6205	53.4967	62.4128	62.2272	69.1083	72.1741	64.8518	63.6708	59.3789	0.957523	1.06563	1.0854	1.16385	MTBP_C789;797	9.7386	1.64163	6.95947	6.06525	8.58045
sp|Q969J2|ZKSC4_HUMAN	ZKSCAN4	ZKSC4_HUMAN Zinc finger protein with KRAB and SCAN domains 4	202;203	R.VLQVPGLAQGGC#C#R.E	87.0006	88.9323	106.934	83.1716	91.017	91.6802	80.1729	81.2827	81.378	77.1978	86.0888	86.8434	86.3846	79.2732	77.4075	94.2891	88.6229	80.9445	83.3767	81.0217	1.06394	1.16486	1.13088	1.16375	ZKSCAN4_C202;203	11.6595	5.34021	0.827625	6.43389	5.84674
sp|Q92564|DCNL4_HUMAN	DCUN1D4	DCNL4_HUMAN DCN1-like protein 4	219	K.C#M*LGLLLGK.I	192.185	159.201	159.128	183.219	169.343	173.994	182.341	166.637	157.54	143.335	171.918	168.087	138.396	152.562	147.741	170.171	175.519	168.839	161.113	146.233	0.969535	1.00789	1.05622	1.1637	DCUN1D4_C219	11.2029	4.02383	7.4308	9.6299	4.92543
sp|P51530|DNA2_HUMAN	DNA2	DNA2_HUMAN DNA replication ATP-dependent helicase/nuclease DNA2	621	K.DTVAC#ILK.G	52.535	53.5756	45.2457	42.0569	49.3746	44.0217	44.4769	44.915	52.21	50.9213	37.7875	42.887	44.8684	43.9845	41.2214	50.4521	45.1511	47.2006	43.8652	43.3581	1.11741	1.06889	1.15016	1.16361	DNA2_C621	8.99624	8.38808	9.20278	15.0947	4.38784
sp|Q6KB66-2|K2C80_HUMAN	KRT80	K2C80_HUMAN Isoform 2 of Keratin, type II cytoskeletal 80	6;16	R.SC#VVGFSSLSSC#EVTPVGSPR.P	169.725	174.007	143.678	155.809	154.981	165.587	147.378	144.363	162.804	152.688	134.08	144.089	148.486	126.149	144.276	162.47	158.792	151.515	143.619	139.637	1.02316	1.0723	1.13126	1.16352	KRT80_C6;16	10.1031	3.71484	6.52879	6.48453	8.50008
tr|E9PF99|E9PF99_HUMAN	CEP192	E9PF99_HUMAN Centrosomal protein of 192 kDa	396	K.QGAEC#PHQNK.T	81.5383	85.6899	67.7551	64.6424	80.7232	81.6051	75.5087	69.3971	79.64	79.8657	73.2204	84.0742	63.392	68.6029	69.9732	78.3278	75.6569	74.8486	79.0534	67.3227	1.0353	1.04648	0.990821	1.16347	CEP192_C396	11.9862	12.6215	6.88489	6.9223	5.15779
sp|Q5K651|SAMD9_HUMAN	SAMD9	SAMD9_HUMAN Sterile alpha motif domain-containing protein 9	1376	K.C#IVNEYTFLLEQC#TVK.I	112.362	105.888	117.913	104.306	117.563	111.913	96.399	122.761	125.31	105.124	107.374	94.9007	95.7261	99.4762	93.7347	112.054	111.261	114.823	102.466	96.3123	1.00713	0.975886	1.09357	1.16345	SAMD9_C1376	5.37111	5.97893	13.9403	6.48776	3.02696
sp|Q00653|NFKB2_HUMAN	NFKB2	NFKB2_HUMAN Nuclear factor NF-kappa-B p100 subunit	114;120	K.QC#SELGIC#AVSVGPK.D	53.6827	40.7711	53.8994	41.1545	44.5248	47.039	40.7306	36.2317	52.2723	46.0412	46.6067	40.1604	44.7684	43.9155	38.8336	49.4511	44.2395	43.0782	44.2695	42.5058	1.1178	1.14794	1.11705	1.16339	NFKB2_C114;120	15.2027	6.67419	19.2069	8.06372	7.54886
sp|Q69YH5|CDCA2_HUMAN	CDCA2	CDCA2_HUMAN Cell division cycle-associated protein 2	522;532	R.NQLVSVVEESVC#NLLNTEVQPC#K.E	121.039	110.811	112.072	113.543	109.886	117.352	94.8477	99.6876	115.448	117.325	118.907	98.0633	101.365	92.3615	101.896	114.64	113.594	103.328	111.432	98.541	1.00921	1.10948	1.02879	1.16338	CDCA2_C522;532	4.8646	3.28647	10.4246	10.4139	5.43754
sp|O15355|PPM1G_HUMAN	PPM1G	PPM1G_HUMAN Protein phosphatase 1G	13	K.C#SGDGVGAPR.L	480.351	494.061	434.595	445.678	478.6	489.446	326.107	463.013	465.52	450.065	315.39	339.783	397.65	371.562	441.925	469.669	471.242	418.213	368.413	403.712	0.996663	1.12304	1.27485	1.16338	PPM1G_C13	6.62991	4.83678	19.0755	19.4773	8.81095
sp|Q9Y4W2|LAS1L_HUMAN	LAS1L	LAS1L_HUMAN Ribosomal biogenesis protein LAS1L	456	R.LFNC#SASLDWPR.M	221.072	211.192	195.884	225.593	197.822	212.082	194.122	195.857	210.86	185.013	209.91	201.022	171.817	188.701	179.431	209.383	211.832	200.28	198.648	179.983	0.988435	1.04545	1.05404	1.16334	LAS1L_C456	6.06109	6.5557	4.59553	6.35159	4.69818
sp|Q15067|ACOX1_HUMAN	ACOX1	ACOX1_HUMAN Peroxisomal acyl-coenzyme A oxidase 1	449	K.LVC#GMVSYLNDLPSQR.I	100.94	96.0571	91.2093	90.7463	91.0253	100.194	89.5732	95.1045	105.31	98.3531	106.977	80.9827	90.5203	76.4883	80.7551	96.0688	93.9884	96.6626	95.4376	82.5879	1.02213	0.993857	1.00661	1.16323	ACOX1_C449	5.0644	5.71961	8.2589	13.8731	8.70984
sp|P33176|KINH_HUMAN	KIF5B	KINH_HUMAN Kinesin-1 heavy chain	65	R.VFQSSTSQEQVYNDC#AK.K	32.4333	30.8631	37.1589	30.4855	27.5837	29.1878	28.2505	32.0321	33.57	38.1188	25.4134	22.8969	29.3268	30.9401	26.0927	33.4851	29.0857	31.2842	28.8097	28.7866	1.15126	1.07035	1.16229	1.16322	KIF5B_C65	9.78648	4.99756	8.75042	28.322	8.57504
sp|O95757|HS74L_HUMAN	HSPA4L	HS74L_HUMAN Heat shock 70 kDa protein 4L	417;421	K.TSFEDGSGEC#EVFC#K.N	74.4566	63.1586	76.4826	70.4804	75.3407	82.0914	69.0296	56.3758	73.7955	72.8455	86.8292	67.6812	68.3934	57.0174	58.6463	71.3659	75.9708	66.4003	75.7853	61.3524	0.939386	1.07478	0.941686	1.16321	HSPA4L_C417;421	10.0603	7.67542	13.558	13.0721	10.0271
sp|P30876|RPB2_HUMAN	POLR2B	RPB2_HUMAN DNA-directed RNA polymerase II subunit RPB2	172;177	R.DLC#ELNEC#PLDPGGYFIINGSEK.V	366.186	360.652	362.954	387.38	386.683	388.964	374.205	364.085	391.413	358.538	371.169	342.081	311.958	309.436	315.514	363.264	387.676	376.568	357.263	312.303	0.93703	0.964671	1.0168	1.16318	POLR2B_C172;177	0.765252	0.301615	3.66899	4.08271	0.977683
sp|O94761|RECQ4_HUMAN	RECQL4	RECQ4_HUMAN ATP-dependent DNA helicase Q4	77	R.C#WGPHLNR.A	204.47	236.633	192.697	199.991	205.686	182.205	170.839	182.554	200.02	204.205	162.526	164.552	181.167	166.93	196.831	211.267	195.961	184.471	177.094	181.642	1.07811	1.14526	1.19296	1.16309	RECQL4_C77	10.7651	6.25041	7.96046	13.2701	8.23383
sp|Q8N371-3|KDM8_HUMAN	KDM8	KDM8_HUMAN Isoform 3 of Lysine-specific demethylase 8	202	R.GSLPEQPC#TK.K	76.8949	80.9711	76.0561	70.0511	68.8029	61.367	66.7518	71.3576	69.83	72.9213	74.7176	69.7006	70.8848	64.0588	66.1849	77.974	66.7403	69.3131	72.4465	67.0428	1.16832	1.12495	1.0763	1.16305	KDM8_C202	3.37188	7.03492	3.38465	3.50877	5.20999
tr|C9JYP6|C9JYP6_HUMAN		C9JYP6_HUMAN Uncharacterized protein	140	K.DILGSFQEC#QNHLR.R	32.0133	38.144	31.3898	36.7137	29.8815	30.1111	22.0805	26.9443	32.21	28.7826	31.4277	23.3156	31.3738	31.0604	24.8785	33.849	32.2354	27.0783	27.842	29.1043	1.05006	1.25004	1.21576	1.16303	_C140	11.0271	12.0365	18.7089	14.8589	12.5855
sp|O75362|ZN217_HUMAN	ZNF217	ZN217_HUMAN Zinc finger protein 217	756	R.TGC#PPALLGK.D	45.605	51.7285	57.4766	42.2863	43.2904	48.0964	43.2623	40.2473	47.39	43.561	43.8529	40.9902	39.7511	42.3806	50.9834	51.6034	44.5577	43.6332	42.8014	44.3717	1.15812	1.18266	1.20565	1.16298	ZNF217_C756	11.5047	6.96953	8.21798	3.68048	13.2402
sp|P17936-2|IBP3_HUMAN	IGFBP3	IBP3_HUMAN Isoform 2 of Insulin-like growth factor-binding protein 3	270	R.GFC#WC#VDK.Y	29.4116	27.2525	31.478	33.1953	25.9225	23.4142	19.2871	29.3249	36.47	24.6923	22.4959	26.6042	28.5182	25.1932	22.0859	29.3807	27.5107	28.3606	24.5975	25.2658	1.06798	1.03597	1.19446	1.16287	IGFBP3_C270	7.19147	18.4666	30.4363	8.35779	12.7316
sp|P35914|HMGCL_HUMAN	HMGCL	HMGCL_HUMAN Hydroxymethylglutaryl-CoA lyase, mitochondrial	141	K.NINC#SIEESFQR.F	7.19833	8.5678	10.8202	8.1841	6.39701	6.21671	11.1131	7.64337	6.45	6.5977	10.4034	10.149	7.35382	6.02765	9.48274	8.8621	6.93261	8.40217	9.05003	7.6214	1.27832	1.05474	0.979234	1.16279	HMGCL_C141	20.6358	15.6877	28.8308	23.5092	22.8701
sp|P23769|GATA2_HUMAN	GATA2	GATA2_HUMAN Endothelial transcription factor GATA-2	85	R.LTGGQMC#R.P	109.923	120.485	129.615	103.771	119.655	117.736	96.2046	105.093	112.9	115.073	105.8	119.62	97.217	103.512	108.912	120.008	113.721	104.733	113.498	103.214	1.05529	1.14585	1.05736	1.16271	GATA2_C85	8.21168	7.62403	7.97605	6.206	5.67091
sp|Q96EK7|F120B_HUMAN	FAM120B	F120B_HUMAN Constitutive coactivator of peroxisome proliferator-activated receptor gamma	523	K.QEDSMC#THAEINQK.L	39.7133	40.1102	41.9455	32.5616	39.0401	33.8165	46.1773	36.7232	39.5	45.0746	36.4055	38.6377	33.7492	34.4552	36.5468	40.5896	35.1394	40.8001	40.0393	34.9171	1.1551	0.994841	1.01375	1.16246	FAM120B_C523	2.9338	9.77793	11.91	11.2423	4.16661
sp|O95759|TBCD8_HUMAN	TBC1D8	TBCD8_HUMAN TBC1 domain family member 8	543;544	K.C#C#LVTEEIER.D	27.5858	28.2186	30.4301	29.0465	30.3905	23.0543	29.9831	28.8076	29.7548	28.6492	26.6095	33.7781	23.2133	27.6661	23.3091	28.7448	27.4971	29.5152	29.6789	24.7295	1.04538	0.9739	0.968528	1.16237	TBC1D8_C543;544	5.19538	14.2046	2.11179	12.4451	10.2857
sp|Q86Y79|PTH_HUMAN	PTRH1	PTH_HUMAN Probable peptidyl-tRNA hydrolase	20	R.C#VLEPRPPGK.R	34.8366	43.3633	34.4633	41.2811	38.8136	39.3069	31.797	41.5543	37.73	38.5347	31.6068	34.6347	32.233	36.1124	28.5818	37.5544	39.8005	37.0271	34.9254	32.3091	0.943566	1.01424	1.07527	1.16235	PTRH1_C20	13.4049	3.28067	13.2781	9.94425	11.6558
sp|P31350-2|RIR2_HUMAN	RRM2	RIR2_HUMAN Isoform 2 of Ribonucleoside-diphosphate reductase subunit M2	377	K.LIGM*NC#TLM*K.Q	38.3016	44.3762	36.0252	37.2164	46.8827	41.3873	38.5499	38.9053	45.65	41.0767	33.9102	34.7456	35.1897	35.7917	31.1437	39.5677	41.8288	41.0351	36.5775	34.0417	0.945944	0.964241	1.08175	1.16233	RRM2_C377	10.9105	11.5907	9.74922	10.7136	7.42533
sp|P02769|ALBU_BOVIN_contaminant	ALB	ALBU_BOVIN_contaminant Serum albumin	460;461	R.C#C#TKPESER.M	112.846	152.221	168.575	129.35	133.285	153.183	113.217	169.563	144.76	93.7002	108.622	114.866	136.606	116.24	120.259	144.547	138.606	142.513	105.73	124.368	1.04287	1.01427	1.36714	1.16225	ALB_C460;461	19.8177	9.21802	19.816	10.2862	8.67348
sp|Q6PL18|ATAD2_HUMAN	ATAD2	ATAD2_HUMAN ATPase family AAA domain-containing protein 2	1388	K.MEQEVENFSC#SR.-	7.11666	14.0612	11.4626	9.52809	10.1942	9.81133	8.23466	3.88587	7.89	12.0515	12.1693	11.0235	8.66791	11.8281	7.58862	10.8801	9.84455	6.67017	11.7481	9.36154	1.1052	1.63116	0.92612	1.16222	ATAD2_C1388	32.2488	3.39589	36.2424	5.36485	23.5346
sp|Q9P275-2|UBP36_HUMAN	USP36	UBP36_HUMAN Isoform 2 of Ubiquitin carboxyl-terminal hydrolase 36	504	K.SQNGC#IPPK.L	43.4	50.8825	53.2569	46.5805	41.2192	44.5388	45.0599	44.7983	37.43	48.6104	39.8988	44.5497	43.2006	40.5229	43.2248	49.1798	44.1128	42.4294	44.353	42.3161	1.11486	1.1591	1.10883	1.1622	USP36_C504	10.4602	6.13411	10.2089	9.82818	3.66997
sp|Q14667|K0100_HUMAN	KIAA0100	K0100_HUMAN UPF0378 protein KIAA0100	1055	R.LVGTEQSGQPC#SR.R	23.9983	24.6667	23.4164	23.7109	23.5168	29.8156	16.6636	18.6475	25.43	22.1271	29.3547	18.9801	15.2383	17.5751	29.2132	24.0271	25.6811	20.247	23.4873	20.6755	0.935595	1.1867	1.02298	1.16211	KIAA0100_C1055	2.60389	13.9475	22.7039	22.6478	36.2049
sp|Q6ZRI6|CO039_HUMAN	C15orf39	CO039_HUMAN Uncharacterized protein C15orf39	471;479	R.DSPVPC#TPPALPPC#AR.E	188.451	197.239	193.565	197.859	189.995	186.548	196.163	189.984	199.02	191.902	174.13	195.639	168.764	152.06	177.724	193.085	191.468	195.056	187.224	166.183	1.00845	0.989896	1.03131	1.16188	C15orf39_C471;479	2.28565	3.02781	2.36797	6.13824	7.83786
sp|Q9H0K6|PUS7L_HUMAN	PUS7L	PUS7L_HUMAN Pseudouridylate synthase 7 homolog-like protein	142	K.THELLNNFAC#DVR.E	90.1366	109.511	100.946	97.4662	92.6218	102.163	85.4923	84.9289	103.74	89.7218	80.22	91.6244	88.8903	89.8267	80.0023	100.198	97.4171	91.3871	87.1887	86.2397	1.02854	1.09641	1.14921	1.16185	PUS7L_C142	9.68947	4.89747	11.7103	7.00736	6.28717
sp|P10398|ARAF_HUMAN	ARAF	ARAF_HUMAN Serine/threonine-protein kinase A-Raf	192	R.TQHC#DPEHFPFPAPANAPLQR.I	172.025	188.623	186.727	187.338	183.539	175.102	170.292	194.305	183.73	179.432	142.781	155.684	164.438	157.093	149.623	182.458	181.993	182.776	159.299	157.051	1.00255	0.998262	1.14538	1.16177	ARAF_C192	4.97922	3.44129	6.58443	11.6705	4.71641
sp|Q9Y6A5|TACC3_HUMAN	TACC3	TACC3_HUMAN Transforming acidic coiled-coil-containing protein 3	502	R.ALNSASTSLPTSC#PGSEPVPTHQQGQPALELK.E	19.8567	24.0947	17.345	19.1327	21.1328	24.8545	19.2264	12.101	23.17	19.0998	15.9698	17.81	17.5633	15.5169	19.6819	20.4321	21.7067	18.1658	17.6265	17.5873	0.941283	1.12476	1.15917	1.16175	TACC3_C502	16.6965	13.3774	30.8832	8.92443	11.8415
sp|O94855-2|SC24D_HUMAN	SEC24D	SC24D_HUMAN Isoform 2 of Protein transport protein Sec24D	1022;1023	K.GLYGGSSYVDFLC#C#VHK.E	117.042	131.106	153.134	135.729	127.632	142.87	98.9367	159.57	135.175	125.486	133.065	103.35	109.344	112.165	123.938	133.761	135.411	131.227	120.634	115.149	0.987816	1.01931	1.10882	1.16163	SEC24D_C1022;1023	13.6003	5.63051	23.2489	12.7992	6.72296
sp|P51580|TPMT_HUMAN	TPMT	TPMT_HUMAN Thiopurine S-methyltransferase	165	K.C#YADTMFSLLGK.K	97.4866	89.7653	77.492	102.602	104.844	96.0328	92.3424	82.7934	92.17	84.8226	95.7163	85.774	79.1989	70.9819	77.7439	88.248	101.16	89.1019	88.7709	75.9749	0.872364	0.990416	0.994109	1.16154	TPMT_C165	11.4261	4.52675	6.1323	6.79684	5.77143
sp|Q9ULA0|DNPEP_HUMAN	DNPEP	DNPEP_HUMAN Aspartyl aminopeptidase	413	R.NDTPC#GTTIGPILASR.L	219.135	214.004	231.922	220.894	229.926	237.86	170.074	207.223	232.06	220.555	175.975	182.424	188.66	177.087	206.86	221.687	229.56	203.119	192.984	190.869	0.965704	1.09142	1.14873	1.16146	DNPEP_C413	4.16234	3.69788	15.3586	12.4847	7.86337
sp|Q8IWB9-2|TEX2_HUMAN	TEX2	TEX2_HUMAN Isoform 2 of Testis-expressed sequence 2 protein	405	K.C#SLSALVSK.E	135.637	138.956	130.711	136.256	130.378	147.539	105.484	129.949	148.58	119.406	100.963	122.909	118.824	115.18	114.959	135.101	138.058	128.004	114.426	116.321	0.978584	1.05544	1.18069	1.16145	TEX2_C405	3.07049	6.3171	16.8852	10.3038	1.86583
sp|Q93097|WNT2B_HUMAN	WNT2B	WNT2B_HUMAN Protein Wnt-2b	72	R.VIC#DNIPGLVSR.Q	26.5883	25.8821	21.8923	20.1051	22.9451	26.3933	23.5987	22.37	22.62	26.5641	25.4134	21.2834	20.7474	21.1569	22.1224	24.7876	23.1479	22.8629	24.4203	21.3422	1.07084	1.08418	1.01504	1.16143	WNT2B_C72	10.2154	13.6039	2.84038	11.3714	3.30784
sp|Q8IY18|SMC5_HUMAN	SMC5	SMC5_HUMAN Structural maintenance of chromosomes protein 5	393	K.TTENC#ENLQPQIDAITNDLR.R	10.2667	10.4029	11.3114	8.62117	7.97199	8.69109	10.7609	9.68549	9.74	11.6702	11.9261	8.28918	6.45671	12.6835	8.40212	10.6603	8.42808	10.0621	10.6285	9.18076	1.26486	1.05945	1.00299	1.16116	SMC5_C393	5.3278	4.70487	6.02041	19.0991	34.6982
sp|O95232|LC7L3_HUMAN	LUC7L3	LC7L3_HUMAN Luc7-like protein 3	40;43	K.YYLC#GFC#PAELFTNTR.S	98.9252	85.8488	86.7247	100.016	86.832	93.9287	98.5896	74.9657	88.0551	90.5337	113.199	90.2135	82.8586	82.0823	68.8771	90.4996	93.5922	87.2035	97.9822	77.9393	0.966956	1.0378	0.923633	1.16115	LUC7L3_C40;43	8.07731	7.05019	13.5716	13.4508	10.0818
sp|Q96K30|RITA_HUMAN	RITA	RITA_HUMAN RBPJ-interacting and tubulin-associated protein	80	K.GSC#ETTPSR.G	84.9216	72.3437	69.3801	63.2656	64.2614	76.878	73.5775	63.5158	73.72	65.5495	67.1294	65.0448	66.1086	61.7734	67.3263	75.5485	68.135	70.2711	65.9079	65.0694	1.10881	1.0751	1.14627	1.16104	RITA_C80	10.9222	11.1367	8.3259	1.65004	4.48546
sp|P55201-2|BRPF1_HUMAN	BRPF1	BRPF1_HUMAN Isoform 2 of Peregrin	570	R.NC#DQVGR.D	60.9933	60.487	56.6579	59.0042	62.4275	60.7515	44.8898	49.6294	58.08	57.2995	49.4577	51.7181	54.206	46.1763	53.0475	59.3794	60.7277	50.8664	52.8251	51.1433	0.977797	1.16736	1.12408	1.16104	BRPF1_C570	3.99207	2.81877	13.1354	7.64104	8.48662
sp|Q9NZE8|RM35_HUMAN	MRPL35	RM35_HUMAN 39S ribosomal protein L35, mitochondrial	119	R.LHC#GLWVR.R	141.68	154.34	165.88	152.056	143.83	129.123	120.799	122.271	152.7	126.292	128.68	108.757	129.652	124.242	143.965	153.966	141.67	131.923	121.243	132.62	1.0868	1.16709	1.2699	1.16096	MRPL35_C119	7.86163	8.20087	13.6505	8.97272	7.68449
sp|Q9BQ61|CS043_HUMAN	C19orf43	CS043_HUMAN Uncharacterized protein C19orf43	165	K.AHQC#GDDDK.T	87.6399	89.5746	67.3269	87.512	77.077	68.9132	67.4076	75.6518	76.72	73.3026	76.3043	69.405	76.874	56.6145	77.1611	81.5138	77.834	73.2598	73.004	70.2165	1.04728	1.11267	1.11657	1.16089	C19orf43_C165	15.1192	11.9774	6.95637	4.73858	16.7775
sp|P49792|RBP2_HUMAN	RANBP2	RBP2_HUMAN E3 SUMO-protein ligase RanBP2	1485;1488	K.EGQWDC#SAC#LVQNEGSSTK.C	96.9819	114.463	88.1228	99.612	89.3722	84.4649	94.0353	84.6755	91.3577	91.167	92.9756	94.4847	98.2815	81.1113	78.6672	99.856	91.1497	90.0228	92.8758	86.02	1.09552	1.10923	1.07516	1.16085	RANBP2_C1485;1488	13.4227	8.47881	5.35481	1.78857	12.426
sp|P40337|VHL_HUMAN	VHL	VHL_HUMAN Von Hippel-Lindau disease tumor suppressor	77	R.EPSQVIFC#NR.S	74.0366	73.1302	58.3206	75.9515	72.6972	64.4076	66.8003	65.5346	68.02	65.6188	56.9051	65.8331	68.0671	61.1586	47.8387	68.4958	71.0188	66.785	62.7857	59.0214	0.964474	1.02562	1.09095	1.16052	VHL_C77	12.882	8.38111	1.86086	8.11305	17.421
sp|Q8IV32|CCD71_HUMAN	CCDC71	CCD71_HUMAN Coiled-coil domain-containing protein 71	76	R.SGDVYGYSSC#TANPPSQTK.L	79.3216	91.0761	70.8412	67.538	74.8116	76.2871	60.7397	64.7294	73.44	68.0337	62.5099	78.31	71.744	72.7996	63.3438	80.413	72.8789	66.303	69.6179	69.2958	1.10338	1.21281	1.15506	1.16043	CCDC71_C76	12.6366	6.42688	9.79552	11.5176	7.47743
sp|Q9BZE9-2|ASPC1_HUMAN	ASPSCR1	ASPC1_HUMAN Isoform 2 of Tether containing UBX domain for GLUT4	224	R.GDLSRPEDADTSGPC#C#EHTQEK.Q	13.3467	13.382	5.90763	8.8397	13.9483	8.29716	11.3803	5.83463	12.77	10.9769	7.07635	14.8171	10.7654	8.19279	9.16706	10.8788	10.3617	9.99499	10.9568	9.37508	1.0499	1.08842	0.992879	1.16039	ASPSCR1_C224	39.574	30.0904	36.712	35.3242	13.8543
sp|Q8IWA0|WDR75_HUMAN	WDR75	WDR75_HUMAN WD repeat-containing protein 75	397	K.AAFGC#FGNWLATVEQR.Q	23.4383	23.5227	21.3002	24.9347	21.9095	21.9124	27.0602	21.4131	19	19.874	29.3675	21.7021	22.1373	18.2032	18.492	22.7538	22.9189	22.4911	23.6479	19.6108	0.992796	1.01168	0.96219	1.16027	WDR75_C397	5.53534	7.61727	18.3932	21.2999	11.1812
sp|Q96FS4|SIPA1_HUMAN	SIPA1	SIPA1_HUMAN Signal-induced proliferation-associated protein 1	307	K.LLEHVAPQLSPSC#LR.L	207.282	209.393	198.718	201.379	205.557	211.947	180.835	180.477	221.69	185.602	183.269	166.252	176.985	177.288	176.129	205.131	206.294	194.334	178.374	176.8	0.994361	1.05556	1.15	1.16024	SIPA1_C307	2.75577	2.57997	12.1913	5.92181	0.339899
sp|Q9C0C2|TB182_HUMAN	TNKS1BP1	TB182_HUMAN 182 kDa tankyrase-1-binding protein	716	K.DTQSPSTC#SEGLLGWSQK.D	221.888	235.966	180.605	214.054	208.901	228.049	209.109	216.792	221.51	218.914	197.613	202.845	208.371	151.988	189.971	212.82	217.001	215.804	206.457	183.443	0.98073	0.986173	1.03082	1.16014	TNKS1BP1_C716	13.52	4.56605	2.90036	5.37666	15.674
sp|Q9NPB8|GPCP1_HUMAN	GPCPD1	GPCP1_HUMAN Glycerophosphocholine phosphodiesterase GPCPD1	642	K.SC#LC#PTVSR.F	143.15	140.791	133.444	129.121	134.359	143.957	120.933	126.612	138.75	130.094	128.244	120.975	112.759	128.305	118.722	139.128	135.812	128.765	126.438	119.929	1.02442	1.08048	1.10037	1.16009	GPCPD1_C642	3.63819	5.54006	7.06842	3.81231	6.53965
sp|Q8TDB6|DTX3L_HUMAN	DTX3L	DTX3L_HUMAN E3 ubiquitin-protein ligase DTX3L	596;599	K.PIC#PTC#QTSYGIQK.G	71.5461	63.0379	70.9408	72.294	53.7314	67.1899	51.9994	54.2757	64.4639	52.6913	46.956	57.8878	56.9583	58.4124	61.7923	68.5082	64.4051	56.913	52.5117	59.0543	1.06371	1.20374	1.30463	1.16009	DTX3L_C596;599	6.92925	14.8894	11.6627	10.4131	4.19966
sp|Q5T6L9|EMARD_HUMAN	ERMARD	EMARD_HUMAN ER membrane-associated RNA degradation protein	181	K.VFVGSPC#GLNLR.N	35.6066	34.8789	36.9573	34.0476	36.2138	35.7246	34.0803	36.1397	32.16	38.812	31.9012	39.5245	26.1553	34.8695	31.593	35.8143	35.3286	34.1267	36.7459	30.8726	1.01375	1.04945	0.974648	1.16007	ERMARD_C181	2.94479	3.21569	5.83198	11.4591	14.257
sp|Q9NR30|DDX21_HUMAN	DDX21	DDX21_HUMAN Nucleolar RNA helicase 2	291	K.LSVAC#FYGGTPYGGQFER.M	190.132	201.278	210.722	210.273	206.765	217.856	185.802	181.702	213.78	185.094	168.425	159.293	180.636	164.471	173.968	200.711	211.631	193.761	170.937	173.025	0.948397	1.03586	1.17418	1.16001	DDX21_C291	5.13533	2.67864	9.00974	7.65352	4.69524
sp|Q15021|CND1_HUMAN	NCAPD2	CND1_HUMAN Condensin complex subunit 1	767	K.VAC#C#PLER.C	27.58	42.4458	41.1015	30.3653	33.8945	45.7329	38.0398	58.7431	35.85	40.9034	36.2135	39.3151	30.1987	34.9898	30.6216	37.0424	36.6642	44.2109	38.8107	31.9367	1.01032	0.837856	0.954439	1.15987	NCAPD2_C767	22.1968	21.9546	28.5738	6.14598	8.30544
sp|Q32P28-3|P3H1_HUMAN	LEPRE1	P3H1_HUMAN Isoform 3 of Prolyl 3-hydroxylase 1	645	K.TVTAEVQPQC#GR.A	35.7816	34.2235	39.4766	34.6049	35.9117	32.8686	36.0965	34.226	37.25	34.8141	40.1036	32.1098	35.0002	30.3922	29.0068	36.4939	34.4617	35.8575	35.6758	31.4664	1.05897	1.01775	1.02293	1.15978	LEPRE1_C645	7.393	4.4299	4.25608	11.397	9.97183
sp|P49023|PAXI_HUMAN	PXN	PAXI_HUMAN Paxillin	290	R.C#WAAGWPR.D	68.4366	60.5823	55.2471	63.7136	61.5213	62.5611	56.0273	61.6837	59.99	51.0715	45.1581	55.1545	49.7457	52.8589	56.2772	61.422	62.5987	59.2337	50.4614	52.9606	0.981203	1.03694	1.21721	1.15977	PXN_C290	10.8019	1.75182	4.90109	9.96015	6.16864
sp|O00622|CYR61_HUMAN	CYR61	CYR61_HUMAN Protein CYR61	353	K.NVMMIQSC#K.C	86.3333	68.6616	78.0841	70.2806	76.9475	76.7672	67.6019	72.8629	74.54	74.9318	69.5479	68.3827	75.0418	65.8096	60.1262	77.693	74.6651	71.6683	70.9541	66.9925	1.04055	1.08406	1.09497	1.15973	CYR61_C353	11.3811	5.08697	5.05107	4.9239	11.2369
sp|Q6ZTI6|F101A_HUMAN	FAM101A	F101A_HUMAN Protein FAM101A	144	K.VFYAPVPTVTAYSETIVAAPNC#TWR.N	151.655	151.73	146.469	151.947	146.937	154.765	141.35	134.815	143.8	131.7	178.124	135.669	128.035	127.048	132.819	149.951	151.216	139.988	148.498	129.301	0.991634	1.07117	1.00979	1.15971	FAM101A_C144	2.01129	2.62202	3.31786	17.3296	2.38717
sp|O60266|ADCY3_HUMAN	ADCY3	ADCY3_HUMAN Adenylate cyclase type 3	479	R.C#DYLEEK.G	27.125	31.2206	30.3443	24.7818	19.2989	26.8981	27.3396	24.2604	27.82	24.207	26.4883	28.501	24.4875	31.3277	20.6653	29.5633	23.6596	26.4733	26.3988	25.4935	1.24953	1.11672	1.11987	1.15964	ADCY3_C479	7.29497	16.5763	7.2958	8.13831	21.1894
sp|Q9Y6J9|TAF6L_HUMAN	TAF6L	TAF6L_HUMAN TAF6-like RNA polymerase II p300/CBP-associated factor-associated factor 65 kDa subunit 6L	230	R.NPHLC#LGPYVR.C	249.071	278.328	271.827	256.81	261.134	261.434	220.55	248.614	244.56	256.779	240.89	228.513	242.954	226.712	219.56	266.409	259.793	237.908	242.061	229.742	1.02547	1.1198	1.10059	1.1596	TAF6L_C230	5.76651	0.99593	6.37564	5.85357	5.21793
tr|I3L2J0|I3L2J0_HUMAN	CIC	I3L2J0_HUMAN Protein capicua homolog	2338	K.C#EGDIFTFDR.T	46.9816	52.4554	40.648	50.0006	49.6982	48.1211	40.0681	42.7679	52.14	46.8887	33.0272	43.2688	40.8125	37.2351	42.7756	46.695	49.2733	44.992	41.0616	40.2744	0.947675	1.03785	1.1372	1.15942	CIC_C2338	12.6543	2.04826	14.0822	17.5091	6.97503
sp|Q9UPN3|MACF1_HUMAN	MACF1	MACF1_HUMAN Microtubule-actin cross-linking factor 1, isoforms 1/2/3/5	4927	K.YQWHVEDLVPWIEDC#K.A	8.78499	10.2003	8.26313	9.51716	7.0982	7.60778	8.34397	9.37042	11.97	7.52207	9.14935	8.79417	5.73649	10.7722	6.99368	9.08282	8.07438	9.8948	8.48853	7.83414	1.12489	0.917939	1.07001	1.15939	MACF1_C4927	11.0357	15.7931	18.889	10.0796	33.4558
tr|J3KNL6|J3KNL6_HUMAN	SEC16A	J3KNL6_HUMAN Protein transport protein Sec16A	107	R.DSSQGPC#EPLPGPLTQPR.A	139.907	158.915	140.221	147.041	131.317	137.002	123.022	137.021	157.41	136.01	102.012	114.694	135.389	117.679	125.619	146.348	138.453	139.151	117.572	126.229	1.05702	1.05172	1.24475	1.15938	SEC16A_C107	7.4378	5.75054	12.4273	14.6128	7.02719
sp|Q9UBZ4|APEX2_HUMAN	APEX2	APEX2_HUMAN DNA-(apurinic or apyrimidinic site) lyase 2	27	R.RPLQGVANQEPSNC#AAVAVGR.I	84.2566	99.9299	94.6229	78.8252	83.5927	89.5207	77.2212	88.6981	80.73	83.6094	76.573	77.571	72.7675	89.399	78.3146	92.9365	83.9795	82.2164	79.2511	80.1603	1.10666	1.13039	1.17268	1.15938	APEX2_C27	8.57743	6.38038	7.15315	4.80395	10.5638
sp|P40616|ARL1_HUMAN	ARL1	ARL1_HUMAN ADP-ribosylation factor-like protein 1	80	R.C#YYSNTDAVIYVVDSC#DRDR.I	14.3967	17.1713	13.4654	19.6244	15.1565	15.2033	18.4369	20.6079	14.59	18.7532	29.3675	19.0417	16.186	9.30209	13.356	15.0111	16.6614	17.8783	22.3875	12.948	0.900954	0.83963	0.670515	1.15934	ARL1_C80	12.843	15.4017	17.0464	27.0089	26.7225
sp|Q6PJT7-2|ZC3HE_HUMAN	ZC3H14	ZC3HE_HUMAN Isoform 2 of Zinc finger CCCH domain-containing protein 14	681	K.PVAPPAPPSSSQLC#R.Y	87.8849	110.988	104.272	92.877	80.7124	103.037	70.529	82.0816	88.71	107.666	116.677	77.0537	97.3308	76.1676	88.0037	101.048	92.2089	80.4402	100.465	87.1674	1.09586	1.25619	1.0058	1.15924	ZC3H14_C681	11.7608	12.1219	11.4383	20.6735	12.1678
sp|P17987|TCPA_HUMAN	TCP1	TCPA_HUMAN T-complex protein 1 subunit alpha	76	K.VLC#ELADLQDK.E	85.4933	102.969	95.9455	99.1926	47.5623	53.5992	75.12	106.039	124.53	114.252	90.2523	67.3481	78.9462	92.914	73.4943	94.8024	66.7847	101.896	90.6175	81.7848	1.41952	0.930382	1.04618	1.15917	TCP1_C76	9.27563	42.2671	24.4995	25.8827	12.247
sp|P40763|STAT3_HUMAN	STAT3	STAT3_HUMAN Signal transducer and activator of transcription 3	712;718	K.FIC#VTPTTC#SNTIDLPM*SPR.T	334.066	309.429	235.168	320.763	306.633	318.975	304.825	273.095	299.008	277.439	278.417	276.234	252.589	253.172	252.302	292.888	315.457	292.309	277.363	252.688	0.928456	1.00198	1.05597	1.15909	STAT3_C712;718	17.5775	2.4389	5.77879	0.394155	0.175477
sp|Q9BQE3|TBA1C_HUMAN	TUBA1C	TBA1C_HUMAN Tubulin alpha-1C chain	315;316	K.YM*AC#C#LLYR.G	1107.67	1113	999.825	1130.82	841.745	954.112	867.352	961.068	1312.12	1273.43	1201.2	947.151	899.631	1017.26	861.647	1073.5	975.56	1046.85	1140.59	926.178	1.10039	1.02546	0.941176	1.15906	TUBA1C_C315;316	5.94875	14.9378	22.397	15.0251	8.75972
sp|Q8WY36|BBX_HUMAN	BBX	BBX_HUMAN HMG box transcription factor BBX	599	K.PEDSDC#HR.K	73.9666	77.2532	89.7104	83.5893	71.3164	98.4087	66.2416	66.7832	76.51	74.747	57.5705	65.9316	74.9281	61.5996	71.3452	80.3101	84.4382	69.8449	66.083	69.291	0.951111	1.14983	1.21529	1.15903	BBX_C599	10.3413	16.0663	8.27326	12.9976	9.95457
sp|Q9Y2X0-3|MED16_HUMAN	MED16	MED16_HUMAN Isoform 3 of Mediator of RNA polymerase II transcription subunit 16	539	K.LSPC#TVTR.V	1190.54	1073.17	1039.82	986.55	1125.26	1105.57	1086.94	1044.32	1003.89	1014.34	1104.93	1074.98	934.352	998.184	917.981	1101.17	1072.46	1045.05	1064.75	950.172	1.02678	1.05371	1.03421	1.15892	MED16_C539	7.18918	6.9977	3.9739	4.3351	4.45997
sp|Q86XL3|ANKL2_HUMAN	ANKLE2	ANKL2_HUMAN Ankyrin repeat and LEM domain-containing protein 2	176	K.TC#SVPPSDTDTYR.A	11.7483	13.4058	11.1729	12.0522	11.8016	14.797	8.1375	8.47189	9.44	12.8025	10.5441	9.74256	13.0777	8.56701	9.7013	12.109	12.8836	8.68313	11.0297	10.4487	0.939878	1.39454	1.09785	1.1589	ANKLE2_C176	9.57423	12.8987	7.7905	14.3859	22.4561
sp|Q5VV17|OTUD1_HUMAN	OTUD1	OTUD1_HUMAN OTU domain-containing protein 1	244	R.C#DAPGGDAAR.R	86.0416	105.852	90.8062	88.9543	92.1687	94.8757	73.3711	90.1334	91.6	88.2428	75.7797	73.4079	91.6195	75.379	76.9547	94.2334	91.9996	85.0348	79.1435	81.3178	1.02428	1.10817	1.19067	1.15883	OTUD1_C244	10.9732	3.2221	11.9101	10.069	11.014
sp|Q17RN3|FA98C_HUMAN	FAM98C	FA98C_HUMAN Protein FAM98C	301;302	R.GTC#C#AINK.V	27.9519	29.5377	26.3013	28.8664	36.9175	29.2484	18.6365	23.6566	35.145	26.5487	26.5876	23.2723	22.2098	19.8771	30.2217	27.9303	31.6774	25.8127	25.4695	24.1029	0.88171	1.08204	1.09662	1.1588	FAM98C_C301;302	5.79402	14.3384	32.7854	7.47148	22.5117
sp|O43464|HTRA2_HUMAN	HTRA2	HTRA2_HUMAN Serine protease HTRA2, mitochondrial	71	R.AC#LTSGTPGPR.A	40.67	43.4348	42.1722	37.424	42.9668	42.4337	38.3798	38.1702	42.31	33.4622	41.0761	44.094	35.1897	33.974	39.8494	42.0923	40.9415	39.62	39.5441	36.3377	1.02811	1.0624	1.06444	1.15837	HTRA2_C71	3.28837	7.46895	5.88583	13.8553	8.53482
sp|Q8TE82|S3TC1_HUMAN	SH3TC1	S3TC1_HUMAN SH3 domain and tetratricopeptide repeat-containing protein 1	390	K.SFFSEGC#FSEEDAR.Q	25.9466	33.866	30.5837	26.7486	25.642	30.7635	32.7079	26.6293	28.77	30.9664	27.3201	30.7673	25.6878	32.1965	20.1554	30.1321	27.718	29.369	29.6846	26.0132	1.08709	1.02598	1.01508	1.15834	SH3TC1_C390	13.2051	9.72247	10.4983	6.90643	23.1695
sp|O43432-3|IF4G3_HUMAN	EIF4G3	IF4G3_HUMAN Isoform 3 of Eukaryotic translation initiation factor 4 gamma 3	307	R.C#ELSSPR.E	20.545	25.7391	22.2198	26.683	23.3874	24.2021	23.368	18.5891	19.07	31.1398	17.8124	21.0986	20.3178	18.4973	20.3254	22.8346	24.7575	20.3424	23.3503	19.7135	0.922332	1.12252	0.977917	1.15833	EIF4G3_C307	11.61	6.93356	12.9349	29.7346	5.34291
sp|Q9UPZ3|HPS5_HUMAN	HPS5	HPS5_HUMAN Hermansky-Pudlak syndrome 5 protein	431	K.FEPLDSAC#SSR.R	116.305	111.644	99.2457	104.306	109.645	97.8671	101.039	88.7214	90.15	94.8405	87.3347	126.173	97.5582	95.44	89.5336	109.065	103.939	93.3033	102.783	94.1773	1.04931	1.16893	1.06112	1.15808	HPS5_C431	8.08431	5.6738	7.2204	20.0435	4.41576
sp|Q9NVH0|EXD2_HUMAN	EXD2	EXD2_HUMAN Exonuclease 3'-5' domain-containing protein 2	202	R.NNLLC#NGLSLK.S	165.935	181.199	163.26	153.466	169.505	176.715	137.475	164.84	182.78	149.69	158.917	151.977	148.378	136.35	156.01	170.131	166.562	161.698	153.528	146.913	1.02143	1.05215	1.10814	1.15804	EXD2_C202	5.68841	7.14493	14.1098	3.12978	6.74638
##tr|E7EWF8|E7EWF8_HUMAN	##LY6E	##E7EWF8_HUMAN ##Lymphocyte antigen 6E	136	R.SPLVC#AGGCGPIGSTM.-	9.58999	11.3681	13.5913	8.87248	10.9817	7.90323	9.61925	10.1989	9.22	13.3456	7.71617	12.8218	10.2094	8.15269	11.474	11.5165	9.25248	9.6794	11.2945	9.94537	1.24469	1.18979	1.01965	1.15797	##LY6E_C136	17.408	17.012	5.08537	27.5354	16.8553
sp|P21580|TNAP3_HUMAN	TNFAIP3	TNAP3_HUMAN Tumor necrosis factor alpha-induced protein 3	521;524	K.C#QAC#LQDVTR.T	216.63	227.472	221.48	196.606	217.621	223.294	182.942	193.422	221.712	203.011	192.519	172.89	193.219	189.195	192.526	221.86	212.507	199.359	189.473	191.647	1.04401	1.11287	1.17093	1.15765	TNFAIP3_C521;524	2.44802	6.61621	10.0598	8.06984	1.12266
sp|Q8N3C0|ASCC3_HUMAN	ASCC3	ASCC3_HUMAN Activating signal cointegrator 1 complex subunit 3	1906	R.AMLPC#PDYDTDTK.T	23.3683	15.9916	22.7362	18.3569	19.7736	19.1549	23.2465	26.7576	22.09	20.3131	18.0428	24.6951	19.168	17.4548	17.0228	20.6987	19.0951	24.0314	21.017	17.8818	1.08398	0.86132	0.984857	1.15753	ASCC3_C1906	19.7533	3.71948	10.115	16.0897	6.34471
sp|P47974|TISD_HUMAN	ZFP36L2	TISD_HUMAN Zinc finger protein 36, C3H1 type-like 2	206	R.TFHTIGFC#PYGPR.C	219.94	250.969	217.335	216.72	218.383	226.313	193.114	187.14	228.17	208.134	204.958	201.921	191.717	198.578	204.298	229.415	220.472	202.808	205.004	198.198	1.04056	1.13119	1.11907	1.1575	ZFP36L2_C206	8.15627	2.32513	10.9297	1.51538	3.17805
sp|Q8WY36|BBX_HUMAN	BBX	BBX_HUMAN HMG box transcription factor BBX	150	K.WC#PTTNKPVK.S	216.393	205.198	186.185	189.283	195.157	186.329	218.85	186.638	181.82	192.708	193.71	204.828	180.017	180.843	164.218	202.592	190.257	195.769	197.082	175.026	1.06484	1.03485	1.02796	1.1575	BBX_C150	7.53821	2.36203	10.2841	3.41311	5.35302
sp|Q93100|KPBB_HUMAN	PHKB	KPBB_HUMAN Phosphorylase b kinase regulatory subunit beta	280	R.QTLC#SLLPR.E	192.512	211.907	220.925	206.646	187.93	225.931	175.794	208.541	194.47	186.284	175.105	179.899	178.513	164.11	197.632	208.448	206.836	192.935	180.429	180.085	1.0078	1.0804	1.15529	1.1575	PHKB_C280	6.96543	9.18678	8.51451	3.10844	9.33799
sp|P78371|TCPB_HUMAN	CCT2	TCPB_HUMAN T-complex protein 1 subunit beta	289	K.HGINC#FINR.Q	137.095	163.408	164.734	141.588	135.556	140.362	125.415	158.854	151.01	149.621	117.47	130.816	128.288	137.446	136.207	155.079	139.169	145.093	132.636	133.98	1.11432	1.06882	1.16921	1.15748	CCT2_C289	10.052	2.29086	12.0525	12.1781	3.70861
sp|Q02880|TOP2B_HUMAN	TOP2B	TOP2B_HUMAN DNA topoisomerase 2-beta	7	K.SGGC#GAGAGVGGGNGALTWVTLFDQNNAAK.K	119.922	142.042	128.809	125.318	120.367	133.764	113.463	115.199	137.01	132.913	121.207	112.588	111.685	108.377	117.593	130.258	126.483	121.891	122.236	112.552	1.02984	1.06864	1.06563	1.15731	TOP2B_C7	8.54546	5.35553	10.7657	8.34596	4.1481
sp|P50748|KNTC1_HUMAN	KNTC1	KNTC1_HUMAN Kinetochore-associated protein 1	2187;2198	K.HC#GKPVPPDTAPC#EILK.M	134.849	142.706	129.402	137.834	149.879	137.266	120.024	136.413	154.998	117.181	109.689	109.752	124.329	113.491	113.821	135.653	141.66	137.145	112.207	117.214	0.957594	0.989118	1.20894	1.15731	KNTC1_C2187;2198	4.93027	5.02849	12.7589	3.83902	5.25909
sp|O75094|SLIT3_HUMAN	SLIT3	SLIT3_HUMAN Slit homolog 3 protein	1355	K.DSVVCEC#R.P	47.04	50.4297	52.4129	35.9707	39.5148	44.9081	52.6144	52.8034	44.15	43.1912	41.6775	42.2588	46.2457	40.5229	42.7513	49.9609	40.1312	49.8559	42.3759	43.1733	1.24494	1.0021	1.17899	1.15722	SLIT3_C1355	5.43823	11.2144	9.91334	1.80199	6.68154
sp|Q14004|CDK13_HUMAN	CDK13	CDK13_HUMAN Cyclin-dependent kinase 13	995	R.C#TAEQALQC#EFLR.D	26.985	29.0876	35.3324	25.0768	32.9775	30.9358	35.0398	25.6374	31.71	23.0862	27.0258	34.7949	27.3052	23.9368	27.7561	30.4683	29.6634	30.7957	28.3023	26.3327	1.02714	0.989369	1.07653	1.15705	CDK13_C995	14.2497	13.8258	15.4808	21.0506	7.9259
sp|Q9NZB2-6|F120A_HUMAN	FAM120A	F120A_HUMAN Isoform F of Constitutive coactivator of PPAR-gamma-like protein 1	920	R.GFAGVC#GFGGPYGETVATGPYR.A	187.973	207.26	196.174	185.35	203.151	204.573	158.147	177.128	202.85	202.137	173.134	156.485	174.142	170.351	166.683	197.136	197.691	179.375	177.252	170.392	0.997189	1.09901	1.11218	1.15695	FAM120A_C920	4.90991	5.4184	12.508	13.034	2.18887
sp|Q14146|URB2_HUMAN	URB2	URB2_HUMAN Unhealthy ribosome biogenesis protein 2 homolog	120	R.NIC#AVLR.C	48.6033	48.8329	49.2765	48.5801	42.8373	48.5642	41.1004	55.8841	48.28	47.1891	46.8728	56.534	35.5814	51.2818	39.9465	48.9042	46.6606	48.4215	50.1986	42.2699	1.04808	1.00997	0.974214	1.15695	URB2_C120	0.699746	7.09599	15.2677	10.9342	19.172
sp|Q9NZV1|CRIM1_HUMAN	CRIM1	CRIM1_HUMAN Cysteine-rich motor neuron 1 protein	496;498;505	R.TC#QC#INTEELC#SER.K	98.7827	120.517	94.895	107.845	103.136	99.6082	74.802	110.837	114.147	94.1834	94.5285	107.315	95.2995	83.0484	93.2269	104.732	103.53	99.9286	98.6755	90.5249	1.01161	1.04806	1.06137	1.15694	CRIM1_C496;498;505	13.1843	3.99157	21.8387	7.58417	7.24362
tr|J3KNL6|J3KNL6_HUMAN	SEC16A	J3KNL6_HUMAN Protein transport protein Sec16A	1692	R.M*PAASTC#C#GDEK.W	88.2349	85.6899	77.1519	66.9698	80.9605	83.5256	62.6587	83.5403	76.71	69.9287	55.5231	71.3633	73.7657	76.515	66.7435	83.6923	77.1519	74.303	65.605	72.3414	1.08477	1.12636	1.2757	1.15691	SEC16A_C1692	6.93646	11.5497	14.3289	13.3536	6.9657
sp|Q9Y6C9|MTCH2_HUMAN	MTCH2	MTCH2_HUMAN Mitochondrial carrier homolog 2	49	R.QVC#QLPGLFSYAQHIASIDGR.R	126.023	115.933	110.469	128.214	122.449	123.67	106.856	110.59	111.39	116.263	161.873	94.408	103.926	101.147	99.5992	117.475	124.778	109.612	124.181	101.557	0.941477	1.07174	0.945998	1.15674	MTCH2_C49	6.7171	2.4346	2.20764	27.7196	2.15905
sp|Q9NS15|LTBP3_HUMAN	LTBP3	LTBP3_HUMAN Latent-transforming growth factor beta-binding protein 3	394	R.TQC#IADKPEEK.S	60.4333	57.2458	55.1841	60.9382	64.6605	59.5697	55.5657	55.1489	69.03	56.0862	48.4724	54.1322	47.8125	48.2345	53.3996	57.6211	61.7228	59.9149	52.8969	49.8156	0.933546	0.961715	1.08931	1.15669	LTBP3_C394	4.58971	4.26836	13.1798	7.47562	6.24516
sp|O76064|RNF8_HUMAN	RNF8	RNF8_HUMAN E3 ubiquitin-protein ligase RNF8	181	K.VSC#ESGQPVK.S	71.5633	69.3289	66.7726	60.7634	63.3876	57.0091	65.1607	64.7878	56.89	62.1524	64.7493	66.2642	53.2078	64.3796	61.9474	69.2216	60.3867	62.2795	64.3886	59.8449	1.14631	1.11147	1.07506	1.15668	RNF8_C181	3.46297	5.30891	7.50031	3.22958	9.81728
sp|O94880|PHF14_HUMAN	PHF14	PHF14_HUMAN PHD finger protein 14	458;463	R.TGVCISC#DAGMC#R.A	62.503	63.2959	52.5606	60.0984	52.6689	55.2787	57.1115	59.5434	49.4069	58.1262	50.8486	48.4802	46.7829	47.3683	60.0509	59.4532	56.0154	55.3539	52.485	51.4007	1.06137	1.07406	1.13277	1.15666	PHF14_C458;463	10.0622	6.72875	9.56002	9.57775	14.5855
sp|Q8WXG1|RSAD2_HUMAN	RSAD2	RSAD2_HUMAN Radical S-adenosyl methionine domain-containing protein 2	33	R.SLVPLFC#WLR.A	281.05	238.54	294.639	281.8	256.787	253.494	246.433	239.64	252.46	269.963	510.406	263.443	240.465	242.429	221.126	271.409	264.027	246.178	347.937	234.673	1.02796	1.10249	0.780053	1.15654	RSAD2_C33	10.7828	5.86286	2.60535	40.4497	5.01682
sp|Q5QJE6|TDIF2_HUMAN	DNTTIP2	TDIF2_HUMAN Deoxynucleotidyltransferase terminal-interacting protein 2	116	R.QILIAC#SPVSSVR.K	27.1716	27.9079	21.8923	17.2642	21.985	26.5534	26.2465	22.2299	25.84	17.5862	28.7917	28.3778	22.5163	20.0476	23.9922	25.6573	21.9342	24.7721	24.9186	22.1854	1.16974	1.03573	1.02965	1.15649	DNTTIP2_C116	12.789	21.1761	8.92518	25.4967	8.98343
sp|Q00534|CDK6_HUMAN	CDK6	CDK6_HUMAN Cyclin-dependent kinase 6	83	R.LFDVC#TVSR.T	69.6616	66.2783	59.1015	66.6529	65.5343	71.5476	66.6667	73.563	57.43	63.6892	59.4388	57.1867	60.4985	55.2913	52.8654	65.0138	67.9116	65.8866	60.1049	56.2184	0.95733	0.986753	1.08167	1.15645	CDK6_C83	8.29425	4.7093	12.2859	5.49372	6.93736
sp|Q99996-6|AKAP9_HUMAN	AKAP9	AKAP9_HUMAN Isoform 6 of A-kinase anchor protein 9	3512	K.LIEMNGGGTGC#NHELEMIR.Q	96.4599	107.938	106.967	92.4071	100.475	98.2979	96.9334	96.9716	111.35	93.8583	87.3219	78.4208	87.0455	92.3527	89.8614	103.788	97.0601	101.752	86.5337	89.7532	1.06932	1.02002	1.1994	1.15637	AKAP9_C3512	6.13271	4.30046	8.16934	8.95474	2.95837
sp|O75143-5|ATG13_HUMAN	ATG13	ATG13_HUMAN Isoform 5 of Autophagy-related protein 13	364	R.LATC#TPSDR.T	108.955	109.117	92.0659	96.7123	98.2098	109.931	89.7432	93.8909	97.13	96.8972	94.104	96.2063	88.5744	92.6467	86.996	103.379	101.618	93.588	95.7358	89.4057	1.01734	1.10462	1.07984	1.1563	ATG13_C364	9.47782	7.12326	3.95638	1.51964	3.26113
sp|P19013|K2C4_HUMAN_contaminant	KRT4	K2C4_HUMAN_contaminant Keratin, type II cytoskeletal 4	42	R.C#SSGGFGSR.S	343.431	325.767	290.318	316.842	320.746	330.126	237.591	346.04	316.15	293.927	242.336	284.616	277.79	265.764	286.279	319.839	322.571	299.927	273.626	276.611	0.991529	1.06639	1.16889	1.15628	KRT4_C42	8.45689	2.11664	18.6764	10.0484	3.72656
sp|Q5T440|CAF17_HUMAN	IBA57	CAF17_HUMAN Putative transferase CAF17, mitochondrial	170	R.VWAVLPSSPEAC#GAASLQER.A	127.272	126.324	106.967	119.123	120.4	123.891	95.3666	116.378	127.39	116.621	98.3523	105.308	102.562	110.703	98.5793	120.188	121.138	113.045	106.761	103.948	0.992156	1.06319	1.12577	1.15623	IBA57_C170	9.53433	2.03761	14.3923	8.63661	5.94485
sp|Q4LE39|ARI4B_HUMAN	ARID4B	ARI4B_HUMAN AT-rich interactive domain-containing protein 4B	828;833	R.YC#NTEEC#LK.T	190.058	180.859	176.999	190.087	171.901	181.124	157.41	180.659	164.545	168.718	171.833	176.754	161.118	160.196	152.609	182.639	181.037	167.538	172.435	157.974	1.00885	1.09013	1.05917	1.15613	ARID4B_C828;833	3.67333	5.02281	7.10865	2.34977	2.95559
sp|Q03164-3|KMT2A_HUMAN	KMT2A	KMT2A_HUMAN Isoform 3 of Histone-lysine N-methyltransferase 2A	456	R.FSAPSC#GSSEK.S	66.08	59.1405	53.7733	46.8646	53.9916	61.0469	59.6831	51.0997	49.66	62.9266	55.8686	70.5874	52.8667	43.4632	58.4992	59.6646	53.9677	53.4809	63.1275	51.6097	1.10556	1.11562	0.945144	1.15607	KMT2A_C456	10.3412	13.1396	10.133	11.6612	14.7189
sp|Q9NS15|LTBP3_HUMAN	LTBP3	LTBP3_HUMAN Latent-transforming growth factor beta-binding protein 3	71	K.VVFAPVIC#K.R	364.793	298.836	276.286	308.089	354.381	295.435	353.034	306.762	284.38	290.83	272.996	335.201	286.963	244.527	281.665	313.305	319.302	314.725	299.676	271.052	0.981218	0.995488	1.04548	1.15589	LTBP3_C71	14.6801	9.71853	11.1249	10.6888	8.53093
sp|Q93097|WNT2B_HUMAN	WNT2B	WNT2B_HUMAN Protein Wnt-2b	362;363	K.FHWC#C#AVR.C	229.918	214.146	216.277	209.402	215.737	219.243	188.787	208.952	209.368	210.58	229.115	200.174	198.884	194.071	178.477	220.114	214.794	202.369	213.29	190.477	1.02477	1.08769	1.03199	1.15559	WNT2B_C362;363	3.88786	2.32204	5.81308	6.87309	5.60044
sp|Q9NV66|TYW1_HUMAN	TYW1	TYW1_HUMAN tRNA wybutosine-synthesizing protein 1 homolog	407;416	R.C#METTPSLAC#ANK.C	353.081	388.712	392.011	371.594	366.339	402.06	331.408	381.772	399.776	358.335	339.437	335.552	328.172	315.731	337.426	377.935	379.997	370.985	344.441	327.109	0.994572	1.01873	1.09724	1.15538	TYW1_C407;416	5.71184	5.07544	9.55213	3.53844	3.32811
sp|P11047|LAMC1_HUMAN	LAMC1	LAMC1_HUMAN Laminin subunit gamma-1	1028;1031;1034	R.SWPGC#QEC#PAC#YR.L	29.3789	28.9519	24.6947	27.1406	26.721	23.877	26.6737	23.9289	28.3609	24.6346	25.9593	32.6348	21.1979	27.3679	23.2962	27.6752	25.9129	26.3212	27.7429	23.954	1.06801	1.05144	0.997561	1.15535	LAMC1_C1028;1031;1034	9.35847	6.85209	8.49854	15.4561	13.0966
sp|Q9UID3|VPS51_HUMAN	VPS51	VPS51_HUMAN Vacuolar protein sorting-associated protein 51 homolog	190	K.C#VELGAYGQAVR.Y	22.7033	23.8206	18.9195	22.4872	21.2946	26.8242	26.3801	18.134	25.88	25.6397	28.9452	22.2687	23.1608	18.9517	14.5337	21.8145	23.5353	23.4647	25.6179	18.8821	0.926883	0.929673	0.851534	1.1553	VPS51_C190	11.7747	12.3644	19.703	13.0312	22.8467
sp|Q9UQ35|SRRM2_HUMAN	SRRM2	SRRM2_HUMAN Serine/arginine repetitive matrix protein 2	1480	R.SEC#DSSPEPK.A	21.2683	19.066	15.2918	14.1282	18.3172	17.6284	16.6879	16.5003	19.15	18.3025	21.0371	18.352	20.0651	9.99707	18.0913	18.5421	16.6913	17.4461	19.2305	16.0511	1.11088	1.06282	0.964198	1.15519	SRRM2_C1480	16.3008	13.4575	8.47528	8.13666	33.2378
sp|Q8IWK6|GP125_HUMAN	GPR125	GP125_HUMAN Probable G-protein coupled receptor 125	1113	K.NSSQGC#K.L	366.753	381.535	326.142	322.141	330.584	337.955	291.031	315.677	306.65	346.581	300.086	314.989	303.389	329.075	297.632	358.143	330.227	304.453	320.552	310.032	1.08454	1.17635	1.11727	1.15518	GPR125_C1113	8.00877	2.39629	4.09559	7.40651	5.39974
sp|P98164|LRP2_HUMAN	LRP2	LRP2_HUMAN Low-density lipoprotein receptor-related protein 2	4383;4389	R.C#MHGGNC#YFDETDLPK.C	63.2779	74.1612	65.7258	69.0485	76.0372	71.5141	56.3892	65.7615	77.6745	62.8421	59.638	62.0946	61.3492	51.3637	63.1825	67.7216	72.1999	66.6084	61.5249	58.6318	0.937974	1.01671	1.10072	1.15503	LRP2_C4383;4389	8.43094	4.90924	16.0159	2.72455	10.8486
sp|O15379-2|HDAC3_HUMAN	HDAC3	HDAC3_HUMAN Isoform 2 of Histone deacetylase 3	219	R.YYC#LNVPLR.D	13.8017	14.0731	17.0931	12.0959	14.9084	14.2554	9.46136	9.42877	7.46	13.8771	16.3409	9.73024	14.9351	13.8863	10.1141	14.9893	13.7532	8.78337	13.3161	12.9785	1.08988	1.70655	1.12565	1.15493	HDAC3_C219	12.1887	10.7027	13.0496	25.0887	19.5358
sp|Q8IZM8|ZN654_HUMAN	ZNF654	ZN654_HUMAN Zinc finger protein 654	380	K.TC#IESMEK.K	65.3333	61.1424	67.0623	52.623	54.1535	59.6928	55.3471	59.2799	57.63	56.0169	56.8411	49.2178	61.0418	49.8384	56.7022	64.5127	55.4897	57.419	54.0253	55.8608	1.16261	1.12354	1.19412	1.15488	ZNF654_C380	4.7186	6.70303	3.43936	7.74406	10.1125
sp|P10826|RARB_HUMAN	RARB	RARB_HUMAN Retinoic acid receptor beta	203	K.AHQETFPSLC#QLGK.Y	159.413	162.371	150.525	145.467	148.102	149.57	138.058	154.676	151.47	152.637	131.738	140.436	145.56	132.795	130.658	157.436	147.713	148.068	141.603	136.338	1.06582	1.06327	1.11181	1.15475	RARB_C203	3.91619	1.40751	5.95393	7.41386	5.91033
sp|Q9Y2Y0|AR2BP_HUMAN	ARL2BP	AR2BP_HUMAN ADP-ribosylation factor-like protein 2-binding protein	149	R.GLDLSSGLVVTSLC#K.S	52.6983	56.4236	43.8475	60.3919	49.6658	57.243	55.7965	44.7866	52.73	53.8215	57.2762	37.7632	47.3323	41.5787	43.5891	50.9898	55.7669	51.1044	49.6203	44.1667	0.914337	0.997758	1.0276	1.15448	ARL2BP_C149	12.6688	9.88628	11.1186	20.985	6.61125
sp|P29144|TPP2_HUMAN	TPP2	TPP2_HUMAN Tripeptidyl-peptidase 2	150	R.VALAEAC#R.K	93.9166	108.343	105.733	88.6156	93.1396	97.2885	87.6785	92.0122	89.65	93.1073	75.8053	90.7499	83.4444	90.4415	92.909	102.664	93.0146	89.7802	86.5542	88.9316	1.10374	1.1435	1.18613	1.15442	TPP2_C150	7.48761	4.66359	2.41676	10.8408	5.52068
sp|Q9NXR7-1|BRE_HUMAN	BRE	BRE_HUMAN Isoform 1 of BRCA1-A complex subunit BRE	34	K.VGLDATNC#LR.I	186.118	199.026	199.625	186.191	192.439	195.636	164.341	195.285	196.86	196.995	171.47	168.912	182.14	156.091	168.346	194.923	191.422	185.495	179.126	168.859	1.01829	1.05082	1.08819	1.15435	BRE_C34	3.9149	2.50952	9.88551	8.66874	7.71776
sp|Q96FW1|OTUB1_HUMAN	OTUB1	OTUB1_HUMAN Ubiquitin thioesterase OTUB1	23	K.QEPLGSDSEGVNC#LAYDEAIMAQQDR.I	61.7866	45.3176	48.7852	50.9949	45.5666	48.6258	42.983	42.9896	43	52.0536	50.3406	44.8577	49.6194	40.4561	44.9732	51.9631	48.3958	42.9909	49.084	45.0162	1.07371	1.2087	1.05866	1.15432	OTUB1_C23	16.7085	5.62338	0.0199619	7.65827	10.1781
sp|Q5JSZ5|PRC2B_HUMAN	PRRC2B	PRC2B_HUMAN Protein PRRC2B	1245	K.SPGSSWQEYGPSDTC#GSR.R	93.8583	87.7514	102.722	80.6719	78.9756	74.8468	74.9864	91.347	87.52	92.3447	77.2384	85.3305	78.4534	84.4272	83.4627	94.7773	78.1647	84.6178	84.9712	82.1144	1.21253	1.12006	1.11541	1.15421	PRRC2B_C1245	7.94243	3.83292	10.1134	8.89657	3.90552
sp|P18085|ARF4_HUMAN	ARF4	ARF4_HUMAN ADP-ribosylation factor 4	159	R.TWYVQATC#ATQGTGLYEGLDWLSNELSK.R	35.6416	35.2245	33.7453	35.9051	32.8265	31.9576	26.8416	31.6237	37.25	39.0431	35.9576	35.965	35.215	26.2089	29.2132	34.8705	33.5631	31.9051	36.9886	30.2123	1.03895	1.09294	0.942737	1.15418	ARF4_C159	2.85772	6.18029	16.3294	4.81044	15.1773
sp|P40763|STAT3_HUMAN	STAT3	STAT3_HUMAN Signal transducer and activator of transcription 3	718	K.FIC#VTPTTC#SNTIDLPM*SPR.T	86.7999	97.6896	87.8713	98.2201	81.4136	98.815	83.1482	88.0563	91.01	86.8216	80.7446	78.2484	75.9137	84.5341	75.5341	90.787	92.8162	87.4048	81.9382	78.6606	0.978137	1.0387	1.10799	1.15416	STAT3_C718	6.61089	10.6441	4.54343	5.38142	6.47096
sp|Q2M1P5|KIF7_HUMAN	KIF7	KIF7_HUMAN Kinesin-like protein KIF7	1065	K.NEAITC#R.Q	221.702	216.995	219.376	211.585	235.524	227.187	161.28	196.569	219.91	190.455	172.494	168.875	187.143	183.649	199.429	219.358	224.765	192.586	177.275	190.074	0.97594	1.13901	1.23739	1.15406	KIF7_C1065	1.07274	5.40661	15.3266	6.51928	4.36036
sp|O60292|SI1L3_HUMAN	SIPA1L3	SI1L3_HUMAN Signal-induced proliferation-associated 1-like protein 3	1775	K.FAEIFC#R.E	240.1	248.395	216.92	215.595	234.446	221.143	247.89	232.405	232.05	229.752	224.191	223.956	195.066	200.169	216.027	235.138	223.728	237.448	225.966	203.754	1.051	0.99027	1.04059	1.15403	SIPA1L3_C1775	6.93787	4.3301	3.80902	1.45194	5.36467
sp|Q96PM5|ZN363_HUMAN	RCHY1	ZN363_HUMAN RING finger and CHY zinc finger domain-containing protein 1	172	R.TC#YEEMLK.E	12.215	17.8744	17.8867	9.15658	5.55558	9.57743	9.14557	10.584	10.35	13.9927	10.493	16.2951	17.8665	14.1269	9.57988	15.992	8.09653	10.0265	13.5936	13.8578	1.97517	1.59497	1.17644	1.15401	RCHY1_C172	20.454	27.3026	7.69811	21.4923	29.9461
sp|Q8TEQ6|GEMI5_HUMAN	GEMIN5	GEMI5_HUMAN Gem-associated protein 5	806	R.EPVIC#TPVSSGFEK.S	31.7333	36.1421	29.3618	29.7097	35.189	31.6375	27.546	32.2305	24.63	29.8803	28.5101	28.772	27.0904	26.8905	30.2816	32.4124	32.1787	28.1355	29.0541	28.0875	1.00726	1.15201	1.11559	1.15398	GEMIN5_C806	10.6155	8.63747	13.6283	2.50344	6.77453
sp|Q8WYP5-2|ELYS_HUMAN	AHCTF1	ELYS_HUMAN Isoform 2 of Protein ELYS	82;85	K.NGLAC#LAC#GPQLEVVNSITGER.L	107.598	136.108	106.152	122.774	117.696	106.466	84.3408	132.33	132.491	108.285	135.558	92.9222	92.6562	108.953	101.579	116.62	115.645	116.387	112.255	101.063	1.00842	1.002	1.03888	1.15393	AHCTF1_C82;85	14.4859	7.21599	23.8454	19.2359	8.07468
sp|P01130|LDLR_HUMAN	LDLR	LDLR_HUMAN Low-density lipoprotein receptor	313;325	K.EC#GTNECLDNNGGC#SHVCNDLK.I	76.4335	75.5274	84.7973	81.2878	83.2582	63.8066	80.1099	76.8771	57.818	80.2557	74.6136	80.8841	65.7262	62.9321	76.5258	78.9194	76.1175	71.6017	78.5845	68.3947	1.03681	1.1022	1.00426	1.15388	LDLR_C313;325	6.47565	14.0664	16.8236	4.39422	10.4964
sp|Q8TDJ6-3|DMXL2_HUMAN	DMXL2	DMXL2_HUMAN Isoform 3 of DmX-like protein 2	920	K.SVQAC#LAK.A	103.18	106.865	95.9833	90.0688	94.7901	99.1351	99.7754	94.1826	96.72	91.5127	89.8684	80.9335	82.6357	90.8023	91.7798	102.009	94.6647	96.8927	87.4382	88.406	1.07759	1.05281	1.16665	1.15388	DMXL2_C920	5.42551	4.78998	2.89019	6.51082	5.67949
sp|Q9NUJ7|PLCX1_HUMAN	PLCXD1	PLCX1_HUMAN PI-PLC X domain-containing protein 1	28	R.NANEDWMSALC#PR.L	30.1466	31.9475	34.3625	34.6377	36.4187	33.2994	27.7525	31.8454	31.99	35.7385	27.4864	27.3802	29.5416	26.396	27.6833	32.1522	34.7853	30.5293	30.2017	27.8737	0.924306	1.05316	1.06458	1.1535	PLCXD1_C28	6.57927	4.4987	7.88053	15.8776	5.67356
sp|O00141-2|SGK1_HUMAN	SGK1	SGK1_HUMAN Isoform 2 of Serine/threonine-protein kinase Sgk1	144	K.IANNSYAC#K.H	305.141	289.291	261.788	275.178	255.438	270.249	253.853	263.76	254.26	273.591	242.49	257.925	250.422	236.107	255.779	285.407	266.955	257.291	258.002	247.436	1.06912	1.10928	1.10622	1.15346	SGK1_C144	7.68603	3.84854	2.1789	6.02732	4.11017
sp|Q70EL1|UBP54_HUMAN	USP54	UBP54_HUMAN Inactive ubiquitin carboxyl-terminal hydrolase 54	1096	K.TNQC#LQGQSLK.T	218.283	238.063	187.873	202.275	225.848	222.743	190.114	190.722	200.06	201.143	179.046	195.036	187.75	180.789	189.983	214.74	216.955	193.632	191.742	186.174	0.989788	1.10901	1.11994	1.15344	USP54_C1096	11.7734	5.90347	2.8792	5.95129	2.57555
sp|O00159|MYO1C_HUMAN	MYO1C	MYO1C_HUMAN Unconventional myosin-Ic	161	R.LLQFYAETC#PAPER.G	90.8949	92.9231	88.9672	97.6738	97.8861	80.9527	88.9173	89.6433	100.91	93.8352	82.229	76.9551	81.8271	70.7814	83.912	90.9284	92.1709	93.1569	84.3398	78.8402	0.98652	0.976078	1.07812	1.15333	MYO1C_C161	2.17551	10.5411	7.21816	10.2392	8.95037
sp|P78527|PRKDC_HUMAN	PRKDC	PRKDC_HUMAN DNA-dependent protein kinase catalytic subunit	3281	R.DDWLVSWVQSYC#R.L	99.6216	105.471	103.969	103.836	94.7793	102.927	79.3709	94.8711	112.91	89.8604	113.247	81.4877	86.8939	86.5789	94.5117	103.021	100.514	95.7174	94.8651	89.3282	1.02494	1.0763	1.08597	1.15328	PRKDC_C3281	2.9488	4.96177	17.5366	17.3516	5.02848
sp|Q68CQ4|DIEXF_HUMAN	DIEXF	DIEXF_HUMAN Digestive organ expansion factor homolog	642	K.EELNFTHIC#EYTQK.S	93.4499	98.345	104.725	88.2659	82.6973	104.613	101.318	92.3272	90.67	92.726	92.3893	91.5012	86.3506	85.9374	84.8347	98.84	91.8588	94.7717	92.2055	85.7076	1.076	1.04293	1.07195	1.15322	DIEXF_C642	5.72021	12.4007	6.04547	0.686191	0.91429
sp|Q8N9T8|KRI1_HUMAN	KRI1	KRI1_HUMAN Protein KRI1 homolog	667	R.LLGPTVM*LGGC#EFSR.Q	130.608	125.192	106.879	105.836	106.484	107.925	119.026	116.051	115.06	117.661	127.349	115.716	109.638	107.322	97.5836	120.893	106.748	116.712	120.242	104.848	1.13251	1.03582	1.00542	1.15304	KRI1_C667	10.286	1.0015	1.76854	5.18211	6.10076
sp|O15230|LAMA5_HUMAN	LAMA5	LAMA5_HUMAN Laminin subunit alpha-5	2117;2119	R.C#QC#PGGR.C	281.529	280.469	276.609	263.297	285.195	254.297	222.232	266.568	276.626	292.522	241.339	283.155	256.615	226.999	243.693	279.536	267.596	255.142	272.339	242.436	1.04462	1.09561	1.02643	1.15303	LAMA5_C2117;2119	0.92633	5.93864	11.3432	10.0067	6.1244
sp|P13645|K1C10_HUMAN_contaminant	KRT10	K1C10_HUMAN_contaminant Keratin, type I cytoskeletal 10	66	R.GSSGGGC#FGGSSGGYGGLGGFGGGSFR.G	36.8433	38.001	38.9727	36.9869	22.136	49.1551	24.7283	24.5755	46.03	31.6135	26.1556	34.8195	31.3864	35.4442	31.8844	37.939	36.0927	31.7779	30.8629	32.905	1.05116	1.19388	1.22928	1.15299	KRT10_C66	2.80996	37.4916	38.8411	14.1932	6.72558
sp|Q9H7E9-2|CH033_HUMAN	C8orf33	CH033_HUMAN Isoform 2 of UPF0488 protein C8orf33	42;44;50	R.NPSTVC#LC#PEQPTC#SNADSR.A	85.2774	103.605	88.4577	98.3202	90.0527	105.464	81.9333	96.356	105.348	88.8831	88.323	89.2499	79.9057	80.1483	80.5046	92.4466	97.9456	94.5459	88.8187	80.1862	0.943857	0.977797	1.04085	1.1529	C8orf33_C42;44;50	10.5933	7.87421	12.4934	0.525575	0.375699
sp|Q6NXT1|ANR54_HUMAN	ANKRD54	ANR54_HUMAN Ankyrin repeat domain-containing protein 54	152	R.TALHFASC#NGNDQIVQLLLDHGADPNQR.D	129.757	125.431	125.799	127.722	125.308	142.529	119.998	124.453	130.99	133.872	122.064	111.701	112.114	107.308	111.049	126.995	131.853	125.147	122.546	110.157	0.963157	1.01477	1.03631	1.15286	ANKRD54_C152	1.88859	7.07153	4.41795	9.05255	2.29134
sp|P15374|UCHL3_HUMAN	UCHL3	UCHL3_HUMAN Ubiquitin carboxyl-terminal hydrolase isozyme L3	95	K.QTISNAC#GTIGLIHAIANNK.D	154.07	150.205	161.975	155.662	141.651	155.578	147.386	149.868	159.74	152.637	146.774	132.405	140.847	128.719	134.871	155.416	150.964	152.331	143.939	134.812	1.0295	1.02025	1.07974	1.15284	UCHL3_C95	3.86034	5.34229	4.28999	7.23188	4.49832
sp|P58107|EPIPL_HUMAN	EPPK1	EPIPL_HUMAN Epiplakin	1888	R.TGGQALSTLEC#VK.P	42.7	48.9997	45.3716	48.3397	43.2365	49.7706	38.477	41.6359	41.93	42.0011	37.6339	39.7339	41.52	47.6198	29.7838	45.6904	47.1156	40.681	39.7896	39.6412	0.969752	1.12314	1.1483	1.1526	EPPK1_C1888	6.92037	7.29012	4.70579	5.48921	22.8681
sp|P15170-3|ERF3A_HUMAN	GSPT1	ERF3A_HUMAN Isoform 3 of Eukaryotic peptide chain release factor GTP-binding subunit ERF3A	414	K.EQSDFC#PWYIGLPFIPYLDNLPNFNR.S	51.1233	61.5475	60.9028	60.523	53.4091	44.6865	43.8939	59.1282	59.17	54.2952	58.9013	46.2248	53.0056	42.1668	55.4273	57.8579	52.8729	54.064	53.1405	50.1999	1.09428	1.07017	1.08877	1.15255	GSPT1_C414	10.0958	15.0018	16.2911	12.0749	14.0667
sp|Q9BSR8|YIPF4_HUMAN	YIPF4	YIPF4_HUMAN Protein YIPF4	94	R.C#VLM*PMPSLGFNR.Q	176.54	182.951	163.965	169.812	161.382	154.679	112.055	148.246	161.24	165.208	169.986	153.134	139.394	168.948	145.835	174.485	161.958	140.514	162.776	151.392	1.07735	1.24177	1.07193	1.15254	YIPF4_C94	5.53515	4.68194	18.1393	5.3356	10.2653
sp|Q96JP0|FEM1C_HUMAN	FEM1C	FEM1C_HUMAN Protein fem-1 homolog C	496	K.NTTC#VGR.Y	415.426	397.134	351.334	371.093	395.212	386.163	312.237	351.875	364.62	364.976	285.601	336.001	338.288	333.806	337.785	387.965	384.156	342.911	328.859	336.626	1.00991	1.13139	1.17973	1.15251	FEM1C_C496	8.50985	3.17173	7.96647	12.214	0.729435
sp|P42684|ABL2_HUMAN	ABL2	ABL2_HUMAN Abelson tyrosine-protein kinase 2	717	K.C#YGGSFAQR.N	25.9116	41.0873	24.8272	24.6943	30.7876	29.0893	23.623	31.2503	27.94	32.1681	27.5248	32.0482	27.4947	28.3874	23.7979	30.6087	28.1904	27.6044	30.5804	26.56	1.08578	1.10883	1.00093	1.15244	ABL2_C717	29.7004	11.1546	13.8553	8.65545	9.16163
sp|Q92466|DDB2_HUMAN	DDB2	DDB2_HUMAN DNA damage-binding protein 2	48;66	R.C#DSDCLWVGLAGPQILPPC#R.S	81.5613	96.5694	88.2597	84.0473	85.7734	91.3952	94.1234	92.2618	91.8749	106.303	91.4492	94.1951	79.5344	77.5499	74.0757	88.7968	87.072	92.7534	97.3158	77.0533	1.01981	0.957343	0.91246	1.15241	DDB2_C48;66	8.46699	4.41272	1.29602	8.12144	3.58583
sp|O14924|RGS12_HUMAN	RGS12	RGS12_HUMAN Regulator of G-protein signaling 12	683;701	K.DC#VSNNSLSSNASLPSVQSC#R.R	10.9539	16.1582	16.5415	11.5858	16.1321	11.5431	11.7121	11.3797	16.7147	13.4061	11.5881	13.4634	11.0181	16.4489	10.4143	14.5512	13.087	13.2688	12.8192	12.6271	1.11188	1.09665	1.13511	1.15238	RGS12_C683;701	21.4502	20.1513	22.5253	8.32015	26.3205
sp|Q9Y2R9|RT07_HUMAN	MRPS7	RT07_HUMAN 28S ribosomal protein S7, mitochondrial	191	K.WMITEC#R.D	102.223	107.092	109.209	94.5815	97.3252	93.5339	98.6702	91.2537	98.28	85.2617	84.0845	87.2396	91.7712	84.2133	100.437	106.175	95.1469	96.0679	85.5286	92.1405	1.1159	1.1052	1.24139	1.15231	MRPS7_C191	3.37382	2.05773	4.34469	1.86422	8.81058
sp|Q9Y4H2|IRS2_HUMAN	IRS2	IRS2_HUMAN Insulin receptor substrate 2	816	K.APYTC#GGDSDQYVLMSSPVGR.I	35.5833	33.5801	34.224	28.475	36.1275	31.8714	23.4287	39.3604	36.06	32.9307	32.1187	27.8236	33.585	27.8662	28.2782	34.4624	32.158	32.9497	30.9577	29.9098	1.07166	1.04591	1.11321	1.15221	IRS2_C816	2.96757	11.9233	25.5206	8.86502	10.6636
sp|Q04760|LGUL_HUMAN	GLO1	LGUL_HUMAN Lactoylglutathione lyase	61	K.C#DFPIM*K.F	161.385	169.247	171.46	133.841	153.291	142.061	130.589	154.816	142.68	140.816	146.287	131.925	156.616	135.522	143.662	167.364	143.064	142.695	139.676	145.267	1.16985	1.17288	1.19823	1.15212	GLO1_C61	3.16369	6.82463	8.48929	5.18969	7.32334
sp|Q5VY43|PEAR1_HUMAN	PEAR1	PEAR1_HUMAN Platelet endothelial aggregation receptor 1	537;539	R.C#DC#DHSDGCDPVHGR.C	31.7284	34.5474	32.77	32.4427	32.2484	27.8686	38.578	37.1719	38.0802	38.8349	30.8911	47.2741	34.8335	23.8583	27.279	33.0152	30.8532	37.9434	39	28.6569	1.07007	0.870118	0.846544	1.15209	PEAR1_C537;539	4.31748	8.3836	1.87907	21.007	19.5969
sp|Q86VP6|CAND1_HUMAN	CAND1	CAND1_HUMAN Cullin-associated NEDD8-dissociated protein 1	413	K.QTRPVQSWLC#DPDAMEQGETPLTMLQSQVPNIVK.A	49.42	45.0673	47.7019	53.9888	54.0024	52.4543	47.5497	47.4006	40.9	44.2543	52.1577	48.3803	40.2944	40.8169	42.3384	47.3964	53.4819	45.2834	48.2641	41.1499	0.886215	1.04666	0.982023	1.1518	CAND1_C413	4.62553	1.66396	8.38471	8.19035	2.58063
sp|Q9Y4H2|IRS2_HUMAN	IRS2	IRS2_HUMAN Insulin receptor substrate 2	670	R.SSSSNLGADDGYMPMTPGAALAGSGSGSC#R.S	30.8233	37.8699	37.1337	32.2993	32.5784	32.2777	30.5095	39.9322	32.52	36.2585	27.2945	28.1931	33.2565	34.7626	23.8708	35.2756	32.3851	34.3206	30.582	30.6299	1.08925	1.02783	1.15348	1.15167	IRS2_C670	10.9803	0.517847	14.4598	16.1416	19.2682
sp|Q9NP80|PLPL8_HUMAN	PNPLA8	PLPL8_HUMAN Calcium-independent phospholipase A2-gamma	714	R.FNPVMC#ENIPLDESR.N	58.345	75.8828	68.07	61.7031	63.8622	65.3063	59.0758	63.4458	79.65	60.1303	58.1592	55.6595	56.6573	59.4345	59.5798	67.4326	63.6239	67.3905	57.983	58.5572	1.05986	1.00062	1.16297	1.15157	PNPLA8_C714	13.0297	2.85016	16.0846	3.86431	2.81258
sp|Q13045|FLII_HUMAN	FLII	FLII_HUMAN Protein flightless-1 homolog	264	R.LNLSSNQITELSLC#IDQWVHVETLNLSR.N	66.2666	70.9614	65.047	60.5121	60.7986	59.8528	52.0921	58.183	67.27	64.6251	92.0438	52.1369	58.8938	57.5366	59.2398	67.425	60.3878	59.1817	69.6019	58.5567	1.11653	1.13929	0.968723	1.15145	FLII_C264	4.63144	0.803107	12.9061	29.3291	1.53735
sp|Q12805|FBLN3_HUMAN	EFEMP1	FBLN3_HUMAN EGF-containing fibulin-like extracellular matrix protein 1	61	K.C#VNHYGGYLC#LPK.T	150.64	150.908	135.284	140.769	152.59	139.808	127.224	133.018	135.5	132.174	120.196	122.638	131.686	116.517	131.241	145.61	144.389	131.914	125.002	126.481	1.00846	1.10383	1.16486	1.15124	EFEMP1_C61	6.14262	4.92997	3.21941	5.06336	6.82509
sp|Q6PJG6|BRAT1_HUMAN	BRAT1	BRAT1_HUMAN BRCA1-associated ATM activator 1	228	R.C#QSPWTEALWVR.L	159.763	141.935	129.401	139.731	152.514	145.643	122.111	148.468	148.79	137.466	136.6	130.164	116.966	132.515	125.012	143.7	145.963	139.79	134.743	124.831	0.984495	1.02797	1.06647	1.15115	BRAT1_C228	10.6178	4.38315	10.9529	2.96088	6.22908
sp|Q9UHI6|DDX20_HUMAN	DDX20	DDX20_HUMAN Probable ATP-dependent RNA helicase DDX20	181	K.C#HIAVGSPGR.I	161.77	153.922	156.521	159.934	141.986	147.428	147.629	158.842	151.17	137.003	135.014	134.733	138.131	134.105	137.992	157.404	149.783	152.547	135.583	136.742	1.05088	1.03184	1.16094	1.1511	DDX20_C181	2.53971	6.14421	3.75757	0.912875	1.67102
sp|Q12888-2|TP53B_HUMAN	TP53BP1	TP53B_HUMAN Isoform 2 of Tumor suppressor p53-binding protein 1	1043;1045	K.TM*SVLSC#IC#EAR.Q	145.559	133.316	126.376	124.897	128.82	133.378	134.24	133.279	130.937	133.749	129.314	126.923	133.262	103.768	115.032	135.084	129.032	132.819	129.995	117.354	1.0469	1.01705	1.03914	1.15108	TP53BP1_C1043;1045	7.19032	3.28917	1.27898	2.66434	12.6827
sp|Q96RD7|PANX1_HUMAN	PANX1	PANX1_HUMAN Pannexin-1	136	R.FAAAPHIC#SDLK.F	101.127	116.779	116.137	97.3679	92.9347	81.5928	95.8403	85.9208	97.34	92.5642	223.666	118.093	100.186	100.639	89.3879	111.348	90.6318	93.0337	144.775	96.7378	1.22857	1.19685	0.769111	1.15103	PANX1_C136	7.95492	8.97669	6.67008	48.0088	6.58396
sp|Q9NQS1|AVEN_HUMAN	AVEN	AVEN_HUMAN Cell death regulator Aven	193	R.ALQELPLC#LR.L	132.475	125.133	109.121	115.987	114.833	119.718	121.577	120.007	118.24	123.103	115.653	123.143	103.977	105.611	109.033	122.243	116.846	119.941	120.633	106.207	1.04619	1.01919	1.01335	1.15099	AVEN_C193	9.76911	2.185	1.39174	3.57526	2.42956
sp|Q96BM1|ANKR9_HUMAN	ANKRD9	ANKR9_HUMAN Ankyrin repeat domain-containing protein 9	109;110	R.C#C#AAPGPHVALAVR.Y	29.9085	30.3888	23.5224	27.8137	24.5551	25.8044	30.1092	21.8507	24.5035	29.0457	21.0212	25.8955	27.7467	25.7097	19.3704	27.9399	26.0577	25.4878	25.3208	24.2756	1.07223	1.09621	1.10344	1.15095	ANKRD9_C109;110	13.7195	6.30903	16.5425	15.9671	17.9952
sp|O95685|PPR3D_HUMAN	PPP1R3D	PPR3D_HUMAN Protein phosphatase 1 regulatory subunit 3D	26	R.SLSC#LSDLDGGVALEPR.A	9.11166	9.74751	13.478	12.3581	12.3194	10.4515	9.99576	10.689	13.27	8.72375	13.1802	11.3807	9.6282	11.5742	6.89654	10.779	11.7096	11.3183	11.0949	9.3663	0.920527	0.952358	0.971534	1.15083	PPP1R3D_C26	21.8837	9.30675	15.2446	20.2068	25.0876
sp|Q9P215|POGK_HUMAN	POGK	POGK_HUMAN Pogo transposable element with KRAB domain	310	K.ASLGWC#R.R	134.878	136.525	123.922	129.339	125.783	135.057	103.698	108.419	125.45	127.713	112.377	110.839	111.533	112.173	119.852	131.775	130.06	112.523	116.976	114.519	1.01319	1.1711	1.12651	1.15068	POGK_C310	5.19878	3.59734	10.1683	7.97626	4.04221
sp|P31629|ZEP2_HUMAN	HIVEP2	ZEP2_HUMAN Transcription factor HIVEP2	1030;1037	R.C#SSEQMPC#PHPAEVPEVR.S	61.6509	59.8262	48.5494	64.8385	56.4519	61.8358	49.4936	56.5532	67.6856	60.6461	44.9167	46.8127	52.7339	42.1281	52.914	56.6755	61.042	57.9108	50.7918	49.2587	0.928467	0.978669	1.11584	1.15057	HIVEP2_C1030;1037	12.521	6.96123	15.8376	16.9053	12.5376
sp|Q8NB46|ANR52_HUMAN	ANKRD52	ANR52_HUMAN Serine/threonine-protein phosphatase 6 regulatory ankyrin repeat subunit C	1038	K.NC#SIAAAK.T	110.472	106.126	104.461	93.4015	100.81	103.554	101.087	92.0705	95.23	97.6598	94.2575	104.976	81.0058	97.5784	100.461	107.019	99.2552	96.1292	98.9644	93.0151	1.07823	1.11329	1.08139	1.15056	ANKRD52_C1038	2.89989	5.29136	4.7593	5.53425	11.2883
sp|P98164|LRP2_HUMAN	LRP2	LRP2_HUMAN Low-density lipoprotein receptor-related protein 2	3491;3493	K.GFTC#EC#PDDFR.T	18.4466	22.7852	23.0659	19.1536	26.2958	15.1594	22.4173	25.6211	22.9333	20.0228	25.2044	29.7585	16.8025	20.0496	19.0318	21.4326	20.2029	23.6572	24.9952	18.628	1.06087	0.905963	0.857466	1.15056	LRP2_C3491;3493	12.0831	27.926	7.2715	19.4885	8.91556
sp|Q9H0H5|RGAP1_HUMAN	RACGAP1	RGAP1_HUMAN Rac GTPase-activating protein 1	327	R.VVSHPEC#R.D	148.085	123.119	129.338	118.314	120.767	128.458	130.734	124.861	113.29	114.576	130.023	137.837	123.511	112.333	112.312	133.514	122.513	122.962	127.479	116.052	1.08979	1.08582	1.04734	1.15047	RACGAP1_C327	9.73402	4.32009	7.21842	9.28585	5.56637
sp|P13489|RINI_HUMAN	RNH1	RINI_HUMAN Ribonuclease inhibitor	75	R.SNELGDVGVHC#VLQGLQTPSC#K.I	136.302	137.18	154.984	144.069	142.104	144.905	110.84	137.837	144.92	147.021	134.835	104.619	126.14	119.283	127.052	142.822	143.693	131.199	128.825	124.158	0.993941	1.08859	1.10865	1.15032	RNH1_C75	7.38113	1.0005	13.7071	16.9461	3.42013
sp|Q9Y3E5|PTH2_HUMAN	PTRH2	PTH2_HUMAN Peptidyl-tRNA hydrolase 2, mitochondrial	36	R.VC#FGMLPK.S	188.253	162.407	183.452	158.164	165.028	164.515	141.629	174.234	153.45	142.157	185.098	148.713	147.039	166.088	151.19	178.037	162.569	156.438	158.656	154.772	1.09515	1.13807	1.12216	1.15032	PTRH2_C36	7.72171	2.35187	10.5515	14.5808	6.47219
sp|Q92616|GCN1L_HUMAN	GCN1L1	GCN1L_HUMAN Translational activator GCN1	648	R.VLQEALC#VISGVPGLK.G	46.2	45.7347	45.4976	46.9083	39.8923	46.3361	43.2259	47.1788	36.64	47.9749	51.3771	46.7668	38.5381	41.7792	39.1573	45.8107	44.3789	42.3482	48.7062	39.8249	1.03226	1.08176	0.940552	1.15031	GCN1L1_C648	0.779979	8.77898	12.5718	4.90824	4.32043
sp|O00622|CYR61_HUMAN	CYR61	CYR61_HUMAN Protein CYR61	303	R.FTYAGC#LSVK.K	207.375	195.772	190.43	181.919	209.073	178.561	180.555	188.389	186.92	187.474	169.807	174.344	175.645	176.994	163.441	197.859	189.851	185.288	177.208	172.027	1.04218	1.06785	1.11653	1.15017	CYR61_C303	4.3784	8.81289	2.24726	5.17769	4.34004
sp|Q9ULI3|HEG1_HUMAN	HEG1	HEG1_HUMAN Protein HEG homolog 1	1062	K.GIC#NLVR.T	70.875	54.374	64.9588	50.8638	53.6572	58.7572	70.1525	53.6319	52.41	55.7742	55.7535	64.3305	54.1934	55.0641	56.1194	63.4026	54.4261	58.7315	58.6194	55.1256	1.16493	1.07953	1.0816	1.15015	HEG1_C1062	13.1854	7.35394	16.873	8.43739	1.7496
sp|P51784|UBP11_HUMAN	USP11	UBP11_HUMAN Ubiquitin carboxyl-terminal hydrolase 11	694	R.C#PFLLDNC#LGTSQWPPR.R	106.05	125.788	111.779	106.634	115.222	116.074	94.7593	111.687	116.21	109.307	102.178	95.5535	108.93	90.4949	99.3563	114.539	112.643	107.552	102.346	99.5938	1.01683	1.06496	1.11913	1.15006	USP11_C694	8.8655	4.63567	10.5133	6.72056	9.25748
sp|Q9Y4A5|TRRAP_HUMAN	TRRAP	TRRAP_HUMAN Transformation/transcription domain-associated protein	620	R.VANC#QTVR.M	292.238	267.628	244.191	263.825	266.83	274.373	279.456	238.963	220.98	229.001	261.275	257.47	233.907	230.08	235.162	268.019	268.343	246.466	249.249	233.05	0.998793	1.08745	1.07531	1.15005	TRRAP_C620	8.96436	2.02499	12.1523	7.07627	1.13605
sp|Q5T4S7-4|UBR4_HUMAN	UBR4	UBR4_HUMAN Isoform 4 of E3 ubiquitin-protein ligase UBR4	4909;4928	K.C#NGLLPVWGPHVPESAFATC#LAR.H	87.8692	105.712	103.429	89.1038	101.968	104.946	78.6444	107.342	104.097	96.0885	86.0061	83.83	86.4915	79.48	92.2881	99.0032	98.6728	96.6946	88.6415	86.0865	1.00335	1.02387	1.11689	1.15004	UBR4_C4909;4928	9.80741	8.53296	16.2531	7.37845	7.45028
sp|P51617|IRAK1_HUMAN	IRAK1	IRAK1_HUMAN Interleukin-1 receptor-associated kinase 1	620	R.EAGC#PQGDTAGESSWGSGPGSR.P	18.795	22.9865	16.4885	18.4443	19.8167	22.3063	19.6272	17.8656	17.88	27.3036	26.2324	22.9092	12.3575	19.1789	19.1355	19.4233	20.1891	18.4576	25.4817	16.8906	0.962069	1.05232	0.762245	1.14995	IRAK1_C620	16.9604	9.69712	5.48765	8.99221	23.243
sp|Q9NYP9|MS18A_HUMAN	MIS18A	MS18A_HUMAN Protein Mis18-alpha	115	R.C#VSC#NVSVDK.E	65.9633	62.5723	69.8083	55.3984	61.1761	53.1191	64.3712	56.841	54.16	62.9497	60.8976	57.0882	46.6753	63.0965	62.7124	66.1147	56.5645	58.4574	60.3118	57.4947	1.16884	1.13099	1.09621	1.14993	MIS18A_C115	5.47589	7.34241	9.05625	4.93156	16.3004
sp|Q9H6R4|NOL6_HUMAN	NOL6	NOL6_HUMAN Nucleolar protein 6	1034	R.QAVDSPAASFC#R.G	32.6316	31.0181	28.858	33.1079	25.9117	34.6166	38.1491	27.3528	28.34	28.8288	30.1865	31.7157	25.9532	29.4165	25.085	30.8359	31.2121	31.2806	30.2437	26.8182	0.987948	0.985783	1.01958	1.14981	NOL6_C1034	6.14031	14.904	19.0812	4.77546	8.54528
sp|Q9ULM3|YETS2_HUMAN	YEATS2	YETS2_HUMAN YEATS domain-containing protein 2	996;1005	K.TSGQQQVC#VSQATVGTC#K.A	16.207	20.6694	15.8288	12.4028	17.1245	19.2441	13.7367	15.0329	16.8031	12.8084	13.7243	15.0112	17.9407	14.232	13.6666	17.5684	16.2571	15.1909	13.848	15.2798	1.08066	1.15651	1.26866	1.14978	YEATS2_C996;1005	15.3239	21.5423	10.133	7.99125	15.1944
sp|Q9NRN7|ADPPT_HUMAN	AASDHPPT	ADPPT_HUMAN L-aminoadipate-semialdehyde dehydrogenase-phosphopantetheinyl transferase	9	R.FC#LVPSMEGVR.W	57.9133	57.7463	53.2443	55.4639	50.3778	56.689	45.7522	47.809	50.37	57.0568	56.726	46.9146	51.3883	45.4412	50.0728	56.3013	54.1769	47.977	53.5658	48.9674	1.03921	1.1735	1.05107	1.14977	AASDHPPT_C9	4.70461	6.1773	4.82211	10.7578	6.37936
sp|P53992|SC24C_HUMAN	SEC24C	SC24C_HUMAN Protein transport protein Sec24C	832	R.IHNLALNC#C#TQLADLYR.N	120.085	149.537	150.323	142.266	140.109	133.001	101.804	136.81	142.41	146.12	125.89	121.702	127.517	111.705	126.032	139.982	138.458	127.008	131.237	121.751	1.011	1.10215	1.06663	1.14974	SEC24C_C832	12.3129	3.50134	17.3268	9.94974	7.17178
sp|P57772|SELB_HUMAN	EEFSEC	SELB_HUMAN Selenocysteine-specific elongation factor	55	R.GITLDLGFSC#FSVPLPAR.L	103.822	97.6777	118.568	121.483	96.5269	113.747	92.0387	101.569	113.19	88.4161	157.036	89.3581	86.4516	88.998	102.999	106.689	110.586	102.266	111.603	92.8162	0.964764	1.04325	0.955967	1.14947	EEFSEC_C55	10.0633	11.5521	10.3581	35.2576	9.59951
sp|Q9Y490|TLN1_HUMAN	TLN1	TLN1_HUMAN Talin-1	2161	R.QELAVFC#SPEPPAK.T	125.405	152.576	134.805	129.809	126.29	125.713	116.67	128.105	133.66	137.431	126.696	121.308	120.529	120.7	117.897	137.595	127.271	126.145	128.478	119.709	1.08112	1.09077	1.07096	1.14942	TLN1_C2161	10.0285	1.74219	6.86753	6.38858	1.31274
sp|Q7Z4F1|LRP10_HUMAN	LRP10	LRP10_HUMAN Low-density lipoprotein receptor-related protein 10	152	R.C#VSAVQR.C	326.153	274.575	261.51	288.836	308.276	248.484	231.166	299.643	306.62	271.141	225.688	262.692	249.6	233.822	266.743	287.413	281.865	279.143	253.174	250.055	1.01968	1.02963	1.13524	1.1494	LRP10_C152	11.8923	10.8205	14.9371	9.54884	6.58467
sp|Q8IY37|DHX37_HUMAN	DHX37	DHX37_HUMAN Probable ATP-dependent RNA helicase DHX37	1026	K.PLEEPAPTYC#PER.G	31.465	26.7282	24.1218	24.9675	25.8254	26.9227	18.3154	28.9748	24.99	26.2637	22.0224	25.7051	25.6373	24.124	21.8552	27.4383	25.9052	24.0934	24.6637	23.8722	1.05918	1.13883	1.1125	1.14939	DHX37_C1026	13.5677	3.78311	22.3544	9.3434	7.97398
sp|Q9H211|CDT1_HUMAN	CDT1	CDT1_HUMAN DNA replication factor Cdt1	486;487	R.MVGSC#C#TIMSPGEMEK.H	61.568	65.2747	59.5858	62.0818	58.4711	64.2433	53.4726	62.3873	68.3058	73.9929	58.0126	64.7434	50.307	53.3131	58.58	62.1428	61.5987	61.3886	65.583	54.0667	1.00883	1.01229	0.947545	1.14937	CDT1_C486;487	4.64687	4.73431	12.1633	12.2336	7.74538
sp|P50613|CDK7_HUMAN	CDK7	CDK7_HUMAN Cyclin-dependent kinase 7	305	R.PGPTPGC#QLPR.P	291.246	275.802	262.443	279.516	277.876	287.003	263.703	246.397	257.02	277.427	231.114	255.339	244.041	241.654	236.024	276.497	281.465	255.707	254.627	240.573	0.982349	1.08131	1.08589	1.14933	CDK7_C305	5.21327	1.72864	3.41324	9.09752	1.71093
sp|P54687|BCAT1_HUMAN	BCAT1	BCAT1_HUMAN Branched-chain-amino-acid aminotransferase, cytosolic	8	K.DC#SNGC#SAEC#TGEGGSK.E	11.4917	11.8805	9.10708	7.76889	12.1252	10.5499	6.13349	10.6424	9.7	5.7311	8.71428	12.5262	8.5921	8.23289	11.4376	10.8264	10.148	8.82529	8.99051	9.42085	1.06685	1.22675	1.20421	1.1492	BCAT1_C8	13.8701	21.7362	26.9488	37.8837	18.6368
sp|Q12802-2|AKP13_HUMAN	AKAP13	AKP13_HUMAN Isoform 2 of A-kinase anchor protein 13	1681	K.QQGFNYC#TSAISSPLTK.S	45.6633	41.0158	39.1743	40.8987	42.902	39.7254	38.5984	35.8363	44.09	41.562	41.3448	36.1743	41.9117	30.7931	36.8139	41.9511	41.1754	39.5083	39.6937	36.5063	1.01884	1.06183	1.05687	1.14915	AKAP13_C1681	7.9714	3.9011	10.6342	7.68338	15.2458
sp|P28300|LYOX_HUMAN	LOX	LYOX_HUMAN Protein-lysine 6-oxidase	330	K.ASFC#LEDTSC#DYGYHR.R	12.4367	12.4048	5.56754	9.88867	12.2546	7.59547	7.91888	8.85697	8.1	10.7805	8.81665	10.8018	11.1318	9.23527	6.09518	10.1363	9.91293	8.29195	10.133	8.82076	1.02254	1.22243	1.00033	1.14915	LOX_C330	39.0351	23.5015	6.00141	11.2506	28.8385
sp|Q92625|ANS1A_HUMAN	ANKS1A	ANS1A_HUMAN Ankyrin repeat and SAM domain-containing protein 1A	849;866	R.C#QDLLSQTSSPLSQNDSC#TGR.S	157.461	181.69	162.124	173.185	157.022	169.312	130.556	150.279	211.412	173.037	147.023	129.204	139.634	146.506	150.075	167.091	166.506	164.082	149.754	145.405	1.00351	1.01834	1.11577	1.14914	ANKS1A_C849;866	7.69388	5.06826	25.6934	14.72	3.64955
sp|P62979|RS27A_HUMAN	RPS27A	RS27A_HUMAN Ubiquitin-40S ribosomal protein S27a	121;126	R.EC#PSDEC#GAGVFM*ASHFDR.H	130.993	131.2	129.957	143.123	128.549	149.24	122.633	113.425	141.982	139.757	126.351	108.05	136.521	90.1288	114.65	130.717	140.304	126.013	124.719	113.766	0.931667	1.03733	1.04809	1.14899	RPS27A_C121;126	0.509356	7.57644	11.5668	12.7619	20.4003
sp|O95625|ZBT11_HUMAN	ZBTB11	ZBT11_HUMAN Zinc finger and BTB domain-containing protein 11	197	K.HC#QAVLK.Q	28.14	27.5862	28.9587	28.7263	26.3971	22.2201	27.1331	32.7206	24.59	19.8971	22.3423	24.0916	24.955	21.2772	27.4769	28.2283	25.7812	28.1479	22.1103	24.5697	1.09492	1.00286	1.2767	1.14891	ZBTB11_C197	2.44625	12.7866	14.7763	9.52882	12.6894
sp|P17010|ZFX_HUMAN	ZFX	ZFX_HUMAN Zinc finger X-chromosomal protein	247	K.VDGTC#PEVIK.V	11.795	7.92432	12.0798	11.1015	11.931	10.1683	11.5018	8.82196	7.92	13.542	13.0394	10.5801	10.917	8.15269	8.60853	10.5997	11.067	9.41459	12.3872	9.22608	0.957779	1.12588	0.855699	1.14888	ZFX_C247	21.8998	7.96835	19.7883	12.7957	16.0634
sp|Q12805|FBLN3_HUMAN	EFEMP1	FBLN3_HUMAN EGF-containing fibulin-like extracellular matrix protein 1	318;320	K.FSC#M*C#PQGYQVVR.S	371.195	394.331	377.49	377.448	357.63	382.208	309.785	312.122	378.72	359.025	342.89	297.984	327.623	330.405	336.866	381.005	372.429	333.542	333.299	331.631	1.02303	1.1423	1.14313	1.14888	EFEMP1_C318;320	3.13963	3.49996	11.7353	9.49006	1.42979
sp|Q15654|TRIP6_HUMAN	TRIP6	TRIP6_HUMAN Thyroid receptor-interacting protein 6	279;282	K.LVHDMNHPPSGEYFGQC#GGC#GEDVVGDGAGVVALDR.V	35.765	42.6673	39.3114	34.9723	35.8457	39.1511	33.875	30.2986	31.7343	35.6862	37.8293	39.4727	31.0889	36.6353	34.7712	39.2479	36.6564	31.9693	37.6627	34.1651	1.0707	1.22767	1.04209	1.14877	TRIP6_C279;282	8.79434	6.01323	5.62961	5.04153	8.26113
sp|Q13444|ADA15_HUMAN	ADAM15	ADA15_HUMAN Disintegrin and metalloproteinase domain-containing protein 15	571	R.NPSGSYVSC#TPR.D	11.3283	12.8457	10.3919	11.6806	12.3194	8.72802	14.8297	11.0975	9.12	11.5315	11.7214	15.1989	8.83217	12.0419	9.21562	11.522	10.9093	11.6824	12.8173	10.0299	1.05616	0.98627	0.898942	1.14876	ADAM15_C571	10.7476	17.5619	24.8188	16.1089	17.4775
sp|O43286|B4GT5_HUMAN	B4GALT5	B4GT5_HUMAN Beta-1,4-galactosyltransferase 5	248	R.NYYGC#GQMPR.H	186.947	222.167	208.556	191.359	217.628	222.805	175.321	200.455	215.55	184.944	156.627	173.309	179.436	171.166	187.129	205.89	210.597	197.108	171.626	179.244	0.977647	1.04455	1.19964	1.14866	B4GALT5_C248	8.62643	8.00598	10.3103	8.29315	4.4538
sp|Q8TD19|NEK9_HUMAN	NEK9	NEK9_HUMAN Serine/threonine-protein kinase Nek9	878	R.LNPAVTC#AGK.G	80.2666	71.9862	85.6418	87.9053	69.2884	72.6679	81.9336	74.1698	70.05	78.0285	73.2332	78.0883	70.9101	69.9394	66.2942	79.2982	76.6205	75.3845	76.45	69.0479	1.03495	1.05192	1.03726	1.14845	NEK9_C878	8.67499	12.9442	8.00459	3.64419	3.52457
sp|Q9UIQ6|LCAP_HUMAN	LNPEP	LCAP_HUMAN Leucyl-cystinyl aminopeptidase	103	R.QSPDGAC#SVPSAR.T	17.3483	16.9926	10.2659	18.8813	18.3172	19.5611	13.1779	19.3243	11.97	16.292	19.4632	15.5561	14.1264	8.03241	16.6828	14.869	18.9199	14.8241	17.1038	12.9472	0.78589	1.00303	0.869338	1.14843	LNPEP_C103	26.8365	3.29192	26.6043	12.1387	34.325
sp|Q86XI2-2|CNDG2_HUMAN	NCAPG2	CNDG2_HUMAN Isoform 2 of Condensin-2 complex subunit G2	184	K.TGADVC#R.L	136.99	128.982	114.714	127.078	122.849	132.545	108.374	111.873	112.62	114.969	114.642	108.486	113.062	105.932	112.567	126.895	127.49	110.956	112.699	110.52	0.995331	1.14365	1.12597	1.14816	NCAPG2_C184	8.89209	3.81326	2.04277	3.24057	3.60244
sp|Q9UBR2|CATZ_HUMAN	CTSZ	CATZ_HUMAN Cathepsin Z	170;173	K.FNQC#GTC#NEFK.E	117.17	123.949	108.92	135.887	123.259	117.844	100.259	108.301	110.998	120.483	119.445	106.427	107.44	96.7861	100.684	116.68	125.663	106.519	115.452	101.637	0.92851	1.09539	1.01063	1.14801	CTSZ_C170;173	6.4507	7.36815	5.24498	6.78438	5.30377
sp|Q7Z2W4|ZCCHV_HUMAN	ZC3HAV1	ZCCHV_HUMAN Zinc finger CCCH-type antiviral protein 1	150	K.EELAVLLLQSDPFFMPEIC#K.S	47.1216	51.383	46.732	41.8493	47.0553	39.5531	42.2542	35.9297	46.75	44.9129	56.3805	39.4506	39.8269	39.6274	47.0616	48.4122	42.8192	41.6446	46.9147	42.172	1.13062	1.16251	1.03192	1.14797	ZC3HAV1_C150	5.32948	8.97725	13.053	18.4178	10.0439
sp|Q99933|BAG1_HUMAN	BAG1	BAG1_HUMAN BAG family molecular chaperone regulator 1	272	K.DLQAEALC#K.L	94.5699	72.2126	64.6943	75.9624	55.8687	68.31	70.0918	59.1282	60.23	81.5989	67.8716	82.7071	60.41	79.3484	61.8867	77.1589	66.7137	63.15	77.3925	67.2151	1.15657	1.22184	0.996982	1.14794	BAG1_C272	20.1401	15.2016	9.55972	10.678	15.6717
sp|O00468|AGRIN_HUMAN	AGRN	AGRIN_HUMAN Agrin	1112	R.ASCYNSALGC#CSDGK.T	29.9833	33.2822	25.7215	25.9509	26.656	21.9862	26.3072	28.5197	28.48	23.9412	23.1485	28.4271	24.121	23.0815	30.3181	29.6623	24.8644	27.769	25.1723	25.8402	1.19296	1.06818	1.17837	1.14791	AGRN_C1112	12.7789	10.1244	4.55936	11.308	15.1416
sp|Q8WYP3-2|RIN2_HUMAN	RIN2	RIN2_HUMAN Isoform 2 of Ras and Rab interactor 2	851	R.VAFQEVNSGC#TGK.T	156.788	164.742	180.92	150.854	149.817	161.487	150.762	150.067	154.8	147.726	144.035	153.873	146.078	148.793	142.86	167.483	154.053	151.876	148.545	145.911	1.08718	1.10276	1.12749	1.14785	RIN2_C851	7.34223	4.19268	1.68277	3.34577	2.03552
sp|Q9H211|CDT1_HUMAN	CDT1	CDT1_HUMAN DNA replication factor Cdt1	441	R.C#PEQEQR.L	127.925	132.771	127.852	128.859	119.256	132.939	110.755	125.165	122.55	129.204	90.8025	98.9652	118.053	101.321	119.135	129.516	127.018	119.49	106.324	112.836	1.01967	1.08391	1.21813	1.14782	CDT1_C441	2.1768	5.53048	6.4246	19.0274	8.85134
sp|P35556|FBN2_HUMAN	FBN2	FBN2_HUMAN Fibrillin-2	2043	R.CIC#PPGYEVK.S	29.4816	29.171	31.8433	29.3928	29.1803	33.1148	23.5016	28.0996	19.68	23.8372	23.9291	23.1186	25.2456	28.2003	25.4006	30.1653	30.5626	23.7604	23.6283	26.2822	0.987	1.26956	1.27666	1.14775	FBN2_C2043	4.84474	7.24012	17.7428	1.87831	6.3273
sp|Q12888-2|TP53B_HUMAN	TP53BP1	TP53B_HUMAN Isoform 2 of Tumor suppressor p53-binding protein 1	1045	K.TM*SVLSC#IC#EAR.Q	53.5966	52.3244	50.5235	47.4765	59.2991	59.6681	49.8452	49.2326	53.72	59.2984	57.9672	51.5333	46.4984	46.1229	43.6862	52.1482	55.4813	50.9326	56.2663	45.4358	0.939924	1.02387	0.926809	1.14773	TP53BP1_C1045	2.96104	12.4993	4.7775	7.3802	3.36038
sp|P08238|HS90B_HUMAN	HSP90AB1	HS90B_HUMAN Heat shock protein HSP 90-beta	590	R.LVSSPC#C#IVTSTYGWTANM*ER.I	113.563	121.51	141.393	142.058	131.921	149.238	118.237	137.277	117.17	116.471	157.804	106.281	102.398	110.917	114.716	125.489	141.072	124.228	126.852	109.343	0.889535	1.01015	0.989253	1.14766	HSP90AB1_C590	11.4233	6.16748	9.10712	21.5093	5.76898
sp|Q14694-2|UBP10_HUMAN	USP10	UBP10_HUMAN Isoform 2 of Ubiquitin carboxyl-terminal hydrolase 10	88	R.SSVELPPYSGTVLC#GTQAVDK.L	156.427	170.188	156.458	166.763	150.67	170.239	147.908	157.173	160.27	163.267	152.762	144.34	142.123	139.678	139.181	161.024	162.557	155.117	153.456	140.328	0.990568	1.03808	1.04932	1.14749	USP10_C88	4.92863	6.4229	4.14677	6.17929	1.12223
sp|Q9H8W4|PKHF2_HUMAN	PLEKHF2	PKHF2_HUMAN Pleckstrin homology domain-containing family F member 2	178;186	K.C#GFVVCGPC#SEK.R	241.017	272.299	256.706	253.611	269.452	265.483	232.737	247.371	265.934	243.92	234.554	214.824	238.36	198.504	234.298	256.674	262.849	248.681	231.099	223.721	0.976509	1.03214	1.11067	1.1473	PLEKHF2_C178;186	6.09369	3.13575	6.69008	6.42687	9.80351
sp|Q96KR1|ZFR_HUMAN	ZFR	ZFR_HUMAN Zinc finger RNA-binding protein	922	R.ANGLQSC#VIIIR.I	30.1	27.7887	38.4941	38.156	29.4176	29.631	24.0481	22.3466	26.29	25.1082	33.232	27.9591	30.4767	30.9	22.6323	32.1276	32.4015	24.2283	28.7664	28.003	0.991546	1.32604	1.11684	1.14729	ZFR_C922	17.5343	15.3841	8.16336	14.3279	16.6267
sp|Q86W42|THOC6_HUMAN	THOC6	THOC6_HUMAN THO complex subunit 6 homolog	314	K.AQVPGSSPGLLSLSLNQQPAAPEC#K.V	146.067	140.517	141.594	151.958	136.441	136.755	114.727	121.524	146.8	148.616	134.182	124.806	128.212	118.668	126.335	142.726	141.718	127.683	135.868	124.405	1.00711	1.11781	1.05048	1.14727	THOC6_C314	2.06192	6.25837	13.2364	8.82783	4.0641
sp|Q6PI48|SYDM_HUMAN	DARS2	SYDM_HUMAN Aspartate--tRNA ligase, mitochondrial	590	R.LIC#LVTGSPSIR.D	244.661	246.226	254.255	229.909	213.755	245.603	243.384	230.118	213.38	251.429	265.357	234.4	229.978	221.352	198.215	248.381	229.756	228.961	250.395	216.515	1.08106	1.08482	0.991955	1.14718	DARS2_C590	2.07221	6.93112	6.56682	6.19184	7.5859
sp|Q9UL15-2|BAG5_HUMAN	BAG5	BAG5_HUMAN Isoform 2 of BAG family molecular chaperone regulator 5	254	R.GVLIALLMGVNNNETC#R.H	106.423	139.873	133.583	146.549	119.353	141.163	88.7351	129.482	152.21	124.686	149.883	96.4033	113.833	96.8166	120.507	126.627	135.688	123.476	123.657	110.386	0.933216	1.02552	1.02401	1.14713	BAG5_C254	14.0389	10.613	26.0463	21.6361	11.0665
sp|Q7L945|ZN627_HUMAN	ZNF627	ZN627_HUMAN Zinc finger protein 627	101;106	K.PC#ESSVC#GEVGMGPSSLNR.H	115.947	115.607	99.8557	107.555	104.885	112.093	119.525	104.57	101.312	116.001	100.229	107.301	101.308	87.9569	99.6436	110.47	108.178	108.469	107.844	96.3029	1.02119	1.01845	1.02435	1.14711	ZNF627_C101;106	8.3224	3.36845	8.95427	7.32569	7.55493
sp|Q9NU22|MDN1_HUMAN	MDN1	MDN1_HUMAN Midasin	449	R.LLSC#GGNWYR.P	79.8583	78.1946	84.4703	83.0976	80.173	79.8448	80.1968	73.7031	83.21	80.351	95.9082	74.7504	71.883	73.1738	66.3792	80.8411	81.0385	79.0366	83.6699	70.4787	0.997564	1.02283	0.966191	1.14703	MDN1_C449	4.02179	2.20981	6.14714	13.102	5.11987
sp|O60353|FZD6_HUMAN	FZD6	FZD6_HUMAN Frizzled-6	317	K.WSC#EAIEQK.A	55.7433	52.5865	48.4325	56.196	45.8686	50.8293	48.7035	43.8064	49.6	42.3246	41.3832	51.9767	44.6536	45.9892	46.0417	52.2541	50.9647	47.37	45.2282	45.5615	1.0253	1.10311	1.15534	1.14689	FZD6_C317	7.01707	10.1345	6.58331	12.9639	1.72666
sp|P48553|TPC10_HUMAN	TRAPPC10	TPC10_HUMAN Trafficking protein particle complex subunit 10	916	R.C#MVTTDHK.V	45.7333	46.962	50.6872	44.6356	41.7154	39.0484	41.5498	41.2392	42.63	48.9108	40.6922	49.1932	47.1554	36.2327	41.6342	47.7942	41.7998	41.8063	46.2654	41.6741	1.14341	1.14323	1.03304	1.14686	TRAPPC10_C916	5.39748	6.68561	1.74622	10.4367	13.1052
sp|Q9C0D7|ZC12C_HUMAN	ZC3H12C	ZC12C_HUMAN Probable ribonuclease ZC3H12C	333	R.VVC#YDDR.F	32.7133	38.2274	42.739	33.5996	31.888	36.9556	32.8536	34.6927	32.02	32.7227	34.4604	38.0834	30.325	38.9191	29.881	37.8932	34.1477	33.1888	35.0889	33.0417	1.10969	1.14175	1.07992	1.14683	ZC3H12C_C333	13.2509	7.54924	4.12043	7.79463	15.4193
sp|Q5JXC2|MIIP_HUMAN	MIIP	MIIP_HUMAN Migration and invasion-inhibitory protein	213;215	K.EEC#IC#SHPEPQLPGLR.E	81.9671	87.6671	81.9141	72.4999	85.3167	69.7197	66.9491	68.4481	86.4565	96.9875	78.749	70.5494	80.5417	67.3358	71.466	83.8494	75.8454	73.9512	82.0953	73.1145	1.10553	1.13385	1.02137	1.14682	MIIP_C213;215	3.94315	10.9687	14.6797	16.4845	9.23966
sp|Q14393-2|GAS6_HUMAN	GAS6	GAS6_HUMAN Isoform 2 of Growth arrest-specific protein 6	167;171	K.DVNECSQENGGC#LQIC#HNK.P	72.597	78.4863	78.0087	64.6077	68.8117	78.1587	53.9764	57.7297	72.0871	60.7661	65.5669	65.0639	64.5962	66.2219	68.9443	76.364	70.5261	61.2644	63.7989	66.5874	1.08278	1.24647	1.19695	1.14682	GAS6_C167;171	4.28348	9.83506	15.6024	4.13574	3.29936
sp|Q99575|POP1_HUMAN	POP1	POP1_HUMAN Ribonucleases P/MRP protein subunit POP1	358	K.SAVC#IADPLPTPSQEK.S	162.587	177.874	155.841	168.992	150.885	173.785	151.783	154.303	170.69	157.478	154.682	141.138	145.522	147.23	140.019	165.434	164.554	158.925	151.099	144.257	1.00535	1.04095	1.09487	1.1468	POP1_C358	6.8241	7.33964	6.45987	5.78388	2.61204
sp|Q8TD26|CHD6_HUMAN	CHD6	CHD6_HUMAN Chromodomain-helicase-DNA-binding protein 6	1936;1938;1940	R.AFPAPAAC#QC#HC#K.H	57.3242	53.3807	48.095	53.5933	53.761	58.7453	60.8943	47.4898	49.8902	48.7902	45.0913	55.8637	49.5618	40.3165	48.6013	52.9333	55.3665	52.7581	49.9151	46.1599	0.956052	1.00332	1.06047	1.14674	CHD6_C1936;1938;1940	8.74845	5.28719	13.5479	10.9658	11.0123
sp|Q96EM0|T3HPD_HUMAN	L3HYPDH	T3HPD_HUMAN Trans-L-3-hydroxyproline dehydratase	205	K.LGLDIC#SAK.T	98.0816	101.276	100.984	89.2493	95.6963	93.0661	95.2087	99.5738	89.28	96.1115	87.1172	114.521	97.1539	84.8281	79.9295	100.114	92.6705	94.6875	99.25	87.3038	1.08032	1.05731	1.00871	1.14673	L3HYPDH_C205	1.76416	3.49801	5.45655	14.0746	10.1657
sp|Q69YH5|CDCA2_HUMAN	CDCA2	CDCA2_HUMAN Cell division cycle-associated protein 2	925	R.TIC#TFDSSGFESMSPIK.E	188.417	199.181	168.059	195.654	185.966	186.723	148.212	176.894	200.47	187.428	186.263	152.642	172.158	161.61	150.801	185.219	189.448	175.192	175.444	161.523	0.977677	1.05723	1.05571	1.1467	CDCA2_C925	8.53332	2.84393	14.9383	11.2606	6.61119
sp|O14967|CLGN_HUMAN	CLGN	CLGN_HUMAN Calmegin	185	K.C#GEDYKLHFIFR.H	101.103	95.8307	102.684	121.221	104.251	101.068	87.0591	86.1659	104.95	96.9665	340.062	102.389	89.5094	87.4343	84.3612	99.8728	108.846	92.725	179.806	87.1016	0.917557	1.07709	0.555448	1.14662	CLGN_C185	3.59334	9.95352	11.428	77.2011	2.97374
sp|Q96JN8|NEUL4_HUMAN	NEURL4	NEUL4_HUMAN Neuralized-like protein 4	1208	R.LNFPASAC#ALK.R	126.047	145.176	142.438	138.234	132.654	136.558	117.605	122.201	134.13	128.222	130.266	123.66	123.739	118.241	118.844	137.887	135.816	124.645	127.383	120.275	1.01525	1.10624	1.08246	1.14644	NEURL4_C1208	7.50252	2.10793	6.84295	2.65496	2.50701
sp|Q5EBL4|RIPL1_HUMAN	RILPL1	RIPL1_HUMAN RILP-like protein 1	47	R.VIDQHGC#EAIAR.L	104.627	112.728	105.985	109.966	117.271	112.836	104.124	120.217	107.1	109.191	103.637	104.754	94.0455	100.198	87.7973	107.78	113.358	110.48	105.861	94.0136	0.95079	0.975558	1.01813	1.14643	RILPL1_C47	4.02555	3.24664	7.7503	2.77518	6.59519
sp|P51878-5|CASP5_HUMAN	CASP5	CASP5_HUMAN Isoform 5 of Caspase-5	328	K.VIIVQAC#R.G	184.17	218.139	194.347	192.146	195.923	218.841	169.77	187.432	191.61	187.878	193.953	187.079	171.513	173.866	175.073	198.885	202.303	182.937	189.637	173.484	0.983105	1.08718	1.04877	1.14642	CASP5_C328	8.76559	7.14062	6.33712	1.98241	1.04339
sp|P78527|PRKDC_HUMAN	PRKDC	PRKDC_HUMAN DNA-dependent protein kinase catalytic subunit	2248	K.DC#LSIPYR.L	17.64	29.6	23.7691	23.2302	23.1069	24.5837	15.3884	14.4699	23.47	20.8908	19.911	20.9016	16.704	21.0767	24.1622	23.6697	23.6403	17.7761	20.5678	20.6476	1.00125	1.33155	1.15081	1.14636	PRKDC_C2248	25.2671	3.46601	27.86	2.76545	18.1499
sp|Q5SNT2|TM201_HUMAN	TMEM201	TM201_HUMAN Transmembrane protein 201	626	R.GC#SEEAATWR.G	37.87	39.9314	37.6627	29.4584	35.5018	36.8448	39.1936	33.7825	27.31	37.1713	43.2643	37.1227	31.7908	36.2461	32.6857	38.488	33.935	33.4287	39.1861	33.5742	1.13417	1.15135	0.982186	1.14636	TMEM201_C626	3.25892	11.5945	17.7981	9.01313	7.01968
sp|P01137|TGFB1_HUMAN	TGFB1	TGFB1_HUMAN Transforming growth factor beta-1	285	R.ALDTNYC#FSSTEK.N	216.335	216.745	208.732	208.547	195.114	199.403	197.025	196.032	218.04	214.997	213.071	191.723	184.591	176.499	198.81	213.937	201.021	203.699	206.597	186.633	1.06425	1.05026	1.03553	1.1463	TGFB1_C285	2.10926	3.41314	6.10201	6.25247	6.05179
sp|Q9H0D6|XRN2_HUMAN	XRN2	XRN2_HUMAN 5'-3' exoribonuclease 2	263	K.PC#GLC#NQFGHEVK.D	178.558	197.691	200.469	169.604	177.196	205.669	153.155	156.672	199.03	169.091	155.155	183.594	163.654	176.633	162.894	192.239	184.156	169.619	169.28	167.727	1.04389	1.13336	1.13563	1.14614	XRN2_C263	6.2055	10.3243	15.0522	8.40044	4.60386
sp|O60934|NBN_HUMAN	NBN	NBN_HUMAN Nibrin	116;119	R.IEYEPLVAC#SSC#LDVSGK.T	134.531	149.049	131.608	156.936	143.153	141.966	119.526	126.23	143.93	126.238	137.112	108.674	118.988	117.582	125.705	138.396	147.352	129.895	124.008	120.758	0.939221	1.06544	1.11602	1.14606	NBN_C116;119	6.74917	5.64716	9.70612	11.5715	3.59486
sp|O60934|NBN_HUMAN	NBN	NBN_HUMAN Nibrin	487	R.IETSC#SLLEQTQPATPSLWK.N	161.093	137.871	117.838	142.965	146.441	148.709	138.884	144.897	141.46	142.665	142.052	145.178	121.224	114.739	127.744	138.934	146.038	141.747	143.298	121.236	0.951354	0.980155	0.969545	1.14598	NBN_C487	15.581	1.98097	2.12837	1.1559	5.36339
sp|Q14592|ZN460_HUMAN	ZNF460	ZN460_HUMAN Zinc finger protein 460	181	K.FEEMFNENC#FLVQHEQILPR.V	107.007	102.575	101.79	102.307	104.24	109.254	80.0632	104.673	106.99	90.0569	109.063	90.0848	85.5924	88.2095	97.9357	103.791	105.267	97.2422	96.4015	90.5792	0.985976	1.06734	1.07665	1.14586	ZNF460_C181	2.70987	3.40634	15.3456	11.3743	7.18037
sp|P51617|IRAK1_HUMAN	IRAK1	IRAK1_HUMAN Interleukin-1 receptor-associated kinase 1	302;307	R.LHC#QTQAC#PPLSWPQR.L	53.1236	57.9423	52.6036	56.2024	48.7343	55.6035	43.8288	40.7333	50.3846	65.4067	45.1518	52.2908	44.7275	50.7691	47.3463	54.5565	53.5134	44.9822	54.2831	47.6143	1.01949	1.21285	1.00504	1.1458	IRAK1_C302;307	5.39572	7.75444	10.9553	18.9255	6.36296
sp|Q969G3-2|SMCE1_HUMAN	SMARCE1	SMCE1_HUMAN Isoform 2 of SWI/SNF-related matrix-associated actin-dependent regulator of chromatin subfamily E member 1	346;349	K.NC#QLC#PR.K	62.4398	73.8599	56.7096	57.8282	55.1225	59.649	61.8937	62.275	56.1255	55.8078	65.181	70.8675	61.3796	59.834	47.2701	64.3365	57.5332	60.0981	63.9521	56.1612	1.11825	1.07052	1.00601	1.14557	SMARCE1_C346;349	13.5709	3.95875	5.73329	11.8913	13.7793
sp|O43365|HXA3_HUMAN	HOXA3	HXA3_HUMAN Homeobox protein Hox-A3	179	K.TSSSSSGESC#AGDK.S	18.025	21.342	14.9391	20.1161	19.1371	18.6009	12.9714	9.4521	22.03	20.6828	19.5655	19.8054	14.5307	14.8486	18.0306	18.1021	19.2847	14.8178	20.0179	15.8033	0.938675	1.22164	0.904293	1.14546	HOXA3_C179	17.6894	3.98392	43.7922	2.93826	12.2468
sp|P18084|ITB5_HUMAN	ITGB5	ITB5_HUMAN Integrin beta-5	498;513	R.C#ECQDGENQSVYQNLC#R.E	8.49479	9.7624	6.39628	9.60078	6.74279	6.51531	6.2289	10.9364	9.98525	7.31681	8.8039	12.2036	7.1126	6.00312	8.40736	8.21782	7.61963	9.05017	9.44145	7.17436	1.07851	0.90803	0.870399	1.14544	ITGB5_C498;513	20.6875	22.5666	27.5038	26.5321	16.7723
sp|Q96PD2-2|DCBD2_HUMAN	DCBLD2	DCBD2_HUMAN Isoform 2 of Discoidin, CUB and LCCL domain-containing protein 2	739	R.TDSC#SSAQAQYDTPK.A	52.7333	58.7115	41.8069	47.8153	44.1642	47.8502	41.5012	46.5604	37.5	51.395	39.5917	43.6876	55.7602	35.5244	42.5084	51.0839	46.6099	41.8539	44.8914	44.5977	1.09599	1.22053	1.13794	1.14544	DCBLD2_C739	16.7805	4.54434	10.8484	13.3501	23.047
sp|Q9H4P4|RNF41_HUMAN	RNF41	RNF41_HUMAN E3 ubiquitin-protein ligase NRDP1	134	K.DELPNHNC#IK.H	38.9316	35.7369	26.83	25.1642	31.4349	26.8488	29.1614	24.4588	23.79	32.9769	31.9523	31.0998	26.1933	36.353	26.0684	33.8328	27.816	25.8034	32.0097	29.5382	1.21631	1.31118	1.05696	1.14539	RNF41_C134	18.5367	11.667	11.3445	2.9362	19.9812
sp|Q96I59|SYNM_HUMAN	NARS2	SYNM_HUMAN Probable asparagine--tRNA ligase, mitochondrial	359	K.HC#GNIPVFVINYPLTLK.P	113.902	112.025	123.645	102.372	113.183	119.607	140.159	99.2938	103.06	109.815	148.283	102.451	110.825	105.905	88.4773	116.524	111.721	114.171	120.183	101.736	1.04299	1.02061	0.969551	1.14536	NARS2_C359	5.35332	7.79618	19.7818	20.4792	11.5425
sp|Q9BY89|K1671_HUMAN	KIAA1671	K1671_HUMAN Uncharacterized protein KIAA1671	1454	K.MGPC#WWESGTGDSHK.V	260.621	266.031	236.91	244.07	269.635	269.202	239.279	237.259	256.94	224.38	229.386	222.022	222.927	218.158	225.582	254.521	260.969	244.493	225.263	222.223	0.975292	1.04102	1.12988	1.14534	KIAA1671_C1454	6.08569	5.60857	4.42827	1.66951	1.69289
sp|Q86Y91-4|KI18B_HUMAN	KIF18B	KI18B_HUMAN Isoform 4 of Kinesin-like protein KIF18B	534	K.VLC#VAQR.Q	61.5883	62.4532	52.6649	50.1426	53.1718	50.2384	50.5739	47.809	53.58	57.9927	48.306	54.6618	51.0219	51.509	51.7605	58.9021	51.1843	50.6543	53.6535	51.4305	1.15078	1.16283	1.09782	1.14528	KIF18B_C534	9.19985	3.3641	5.69813	9.17264	0.730131
[truncated: 11,346 more rows]
