# Supplementary material for: Covalent disruptor of YAP-TEAD association suppresses defective Hippo signaling
Source: eLife. 2022 Oct 27;11:e78810. doi: 10.7554/eLife.78810 (PMC9728995; doi:10.7554/eLife.78810)
Supplement: Supplementary file 3. [file elife-78810-supp3.xlsx]

## Sheet: 2uM Treatment
ADM
DDX20
ABL2
DDIT4
NPPB
FAM212B
ANKRD1
MSX1
ADAMTS1
JPH1
INHBA
PPME1
CYR61
PLK2
CAVIN2
CNKSR2
CDC42EP3
RND3
ZNF714
LATS2
GADD45B
RAB7B
C1ORF198
SAA2
RUBCNL
AMOTL2
KCND3
WWC2
RRAD
RIN2
SYNPO2L
PRAG1
SKP2
TUFT1
STXBP6
KIAA1217
PKP2
SH2D4A
CDV3
STARD13
NABP1
MID1
RAPGEF2
FAM83A
LIFR
ZNF431
CYP1B1
TRIM16L
TRIM58
STX11
TNFSF18
AP4E1
PHLPP1
ADAMTS15
OTUD1
TMCC3
SYDE2
SEMA4B
RASAL2
RGS3
ZNF92
GDF15
CDC42EP4
ARHGAP28
IRF2BPL
FBXO32
BCL3
ZNF804A
FRY
TPPP
BMP4
GRB7
THBD
FAT1
PAWR
FAM174B
GREB1L
PLCB4
SMTNL2
ROR1
NUAK2
ARHGAP29
NUAK1
GCNT4
ASPM
ZBTB7C
GDF6
BDNF
GJA1
PLEKHA7
SCAF11
BAMBI
CITED2
PTGES
BDKRB1
EXPH5
THBS1
ID4
NOCT
TNFRSF1A
CLIC5
IRS1
CD274
LHX1
PTPRH
DAAM2
GPRC5C
C6ORF132
FGF2
PXDC1
CALHM2
HTR7P1
CEBPD
BDKRB2
TRANK1
DAB2
ZNF788
SLC2A3
ADAMTS5
KLF2
FMN2
RASAL2-AS1
ZNF367
IL22RA1
SLC25A17
NADK2
KCNB1
ZBED2
BTBD3
IL6
ELF3
CHML
CTGF
OXTR
HMOX1
TRIM47
TNFRSF9
CYP1A1
MTCL1
ZNF780A
MINDY2
GNAZ
FJX1
CD3EAP
CRABP2
SPSB1
C4ORF46
RAB30
TNFAIP8L3
MTSS1
ZNF780B
IRF1
CSF1
FAT4
FAM110B
PLLP
DLX2
ITGA5
ZFPM1
JUNB
EPHB3
MALAT1
GPER1
CYP2S1
NRP1
KIAA0513
LMBRD2
ZNF708
RPP25
ARL5B
KSR1
FGF9
P2RY2
FANCB
AQP1
DKK1
RRS1
ZNF460
COPG2IT1
SLC25A25
ABCG1
FRMD4B
MR1
ZNF738
JCAD
USP43
CSPG4
SLC7A8
SAMD11
NDRG4
TUBB3
LINC00968
KLF16
EVA1C
RAC2
PTCH1
GRAMD2A
TMC3
HOXA5
KIAA0040
ADGRF4
CAPN5
EFR3B
LOC100288175
ASIC2
SEC14L2
TSPAN18
AHRR
LINC02581
AMPD3
CRIPAK
FGD3
TNFRSF1B
TMEM170B
VDR
FRMD4A
MSC
CDKN1C
SMIM5
F3
LINC00346
ERBB3
CBR3
SHISAL1
FAM234B
SOX6
ADGRE5
TRPS1
B3GNT7
RGS7
LHX4
FRMPD3
MTRNR2L2
FAM212B-AS1
OSGIN1
LBH
RSPO1
NPR3
KCNA4
ADAT2
PER2
GUCY1A2
EPGN
MLKL
CCDC148
RIMS2
ABHD6
LYPD3
TBX3
CORO1A
ANKRD20A5P
C1QL4
TNFSF4
LINC01750
IRAK2
FOXA2
RNF144B
HES2
KLF17
ALMS1-IT1
RND1
P2RX7
PCDH1
IKZF2
FGFBP1
GSEC
MYCL
SLC26A9
PAG1
TNS4
GATA3
ZXDA
GJB2
ZNF493
LOC642361
CHST1
RTN4RL2
NOS1AP
CCDC144B
SERTAD4
TUBB2B
KANTR
PGF
GATA5
CD248
SPX
UBALD2
SNAI1
RTKN2
PLEKHH3
ADAMTS9
TUBB2A
ABCB1
MBOAT1
IRF7
EDN2
CCNJL
ACTG1P20
BLACAT1
GEM
LINC01119
S100A4
THSD4-AS2
IL1A
NFE2
TMOD2
LRIG3
PPP2R2B
SNORA73A
SLC19A3
TRIM69
FAM43A
CYP3A5
PCDH9
PLCH2
DGKH
GDF5OS
ANKHD1
LINC00472
TTLL1
CAMKK1
KCNQ1OT1
GMPR
IVL
IGFL2
AARD
LRIG1
SNORA73B
SMG1P6
SMG1P1
RGS2
FGF1
ARHGAP30
RTN4RL1
KCND2
LIPG
FAM89A
KBTBD8
PPP1R3C

## Sheet: 0.5 uM Treatment
CTGF
ADM
MSX1
PPME1
DDX20
ABL2
CYR61
DDIT4
FAM212B
ERBB3
F3
TUFT1
NPPB
CAVIN2
ANKRD1
GADD45B
TRIM58
INHBA
C1ORF198
JPH1
ADAMTS1
SYNPO2L
THBS1
FBXO32
CDC42EP3
STXBP6
SMTNL2
RAB7B
CYP1B1
FAM174B
SLC2A3
MID1
C6ORF132
RRAD
CNKSR2
ELF3
ZNF714
RRS1
OTUD1
THBD
PRAG1
RUBCNL
STX11
ZNF92
NOCT
CD3EAP
ZNF431
KLF16
TMCC3
GDF15
SYDE2
RASAL2-AS1
PTPRH
RHOU
TPPP
SAMD11
BCL3
IL6
HTR7P1
FRMD4B
BDKRB2
ZNF804A
GDF6
GNAZ
TNFSF18
LHX1
IL22RA1
AQP1
PPP1R3C
LINC02581
IRS1
TRPS1
PTX3
MTRNR2L2
SENP3
CDKN1C
SEMA6D
DLX2
RNF144B
GPER1
ABCG1
FAM212B-AS1
P2RY2
TNFSF4
RORC
KCNA4
ADGRF4
PRR5L
EPHB3
FRMPD3
PCDH9
DBP
PAG1
SERPINB9P1
CH17-340M24.3
MBOAT1
SERTAD4
MYCL
IKZF2

## Sheet: 0.1 uM Treatment
CTGF
