# Supplementary material for: Covalent disruptor of YAP-TEAD association suppresses defective Hippo signaling
Source: eLife. 2022 Oct 27;11:e78810. doi: 10.7554/eLife.78810 (PMC9728995; doi:10.7554/eLife.78810)
Supplement: Supplementary file 4. [file elife-78810-supp4.xlsx]

## Sheet: Sheet1
Depmap_ID	Disease	Disease subtype	Cell line	AUC	YAP1 CRISPR (Avana) Public 21Q1	TEAD1 CRISPR (Avana) Public 21Q1	TEAD2 CRISPR (Avana) Public 21Q1	TEAD3 CRISPR (Avana) Public 21Q1	TEAD4 CRISPR (Avana) Public 21Q1
ACH-000335	mesothelioma	mesothelioma	MSTO-211H	0.611038	-1.04039	-0.365321	0.116668	-0.670284	-0.864181
ACH-000160	soft_tissue	ATRT	BT-12	0.639814	#N/A	0.0736281	0.0807408	-0.525443	-0.307323
ACH-000283	central_nervous_system	glioma	A1207	0.690658	#N/A	#N/A	#N/A	#N/A	#N/A
ACH-001795	soft_tissue	liposarcoma	94T778	0.691103	-1.02828	-1.33469	0.0368228	-0.603678	-0.644906
ACH-000976	bile_duct	cholangiocarcinoma	HuCCT1	0.71163	-0.543296	-0.58386	-0.00640985	-0.591013	-0.376226
ACH-000437	central_nervous_system	glioma	SW 1088	0.721317	-0.578936	-0.656435	0.0374481	-0.497236	-0.466241
ACH-000680	colorectal	colorectal_adenocarcinoma	SW948	0.731031	-0.206064	0.129878	-0.277716	-0.675978	-1.12647
ACH-000787	lung	NSCLC	LXF-289	0.731122	-0.347051	-0.840232	-0.0994972	-0.58061	-0.437233
ACH-000856	breast	breast_carcinoma	CAL-51	0.733021	-0.679563	-0.325948	-0.0148861	-0.394439	-0.475518
ACH-000093	pancreas	exocrine	Panc 05.04	0.737708	#N/A	#N/A	#N/A	#N/A	#N/A
ACH-000051	soft_tissue	rhabdomyosarcoma	TE 617.T	0.749334	#N/A	#N/A	#N/A	#N/A	#N/A
ACH-001537	bile_duct	cholangiocarcinoma	KKU-055	0.751075	#N/A	#N/A	#N/A	#N/A	#N/A
ACH-000836	upper_aerodigestive	upper_aerodigestive_squamous	YD-15	0.751249	#N/A	-0.676599	-0.110122	-0.640253	-0.354687
ACH-001687	kidney	NA	UM-RC-3	0.752202	#N/A	#N/A	#N/A	#N/A	#N/A
ACH-000153	mesothelioma	mesothelioma	NCI-H2052	0.752849	-1.24257	-0.79869	-0.241377	-0.168307	-0.483018
ACH-001796	soft_tissue	liposarcoma	95T1000	0.75683	-0.87085	-0.970084	-0.0772615	-0.523405	-0.67645
ACH-000853	lung	NSCLC	NCI-H661	0.764403	-1.01373	-0.657927	-0.0306137	-0.653116	-0.513807
ACH-000361	liver	hepatocellular_carcinoma	SK-HEP-1	0.764582	-1.34924	-1.06864	-0.0766042	-0.762707	-0.566525
ACH-000231	central_nervous_system	glioma	KALS-1	0.767141	-0.208764	-0.0828041	0.105531	-0.730433	-0.365167
ACH-000888	lung	NSCLC	NCI-H1793	0.7684	-0.107857	-0.0432395	-0.0211045	-0.368985	-0.336931
ACH-001407	urinary_tract	bladder_carcinoma	UM-UC-13	0.769498	-0.167382	-1.00571	-0.147649	-0.933936	-0.865247
ACH-001834	bile_duct	cholangiocarcinoma	ICC10	0.771429	#N/A	#N/A	#N/A	#N/A	#N/A
ACH-000826	lung	NSCLC	CAL-12T	0.77467	-0.725952	-0.339719	0.24847	-0.567804	-0.465325
ACH-000935	colorectal	colorectal_adenocarcinoma	MDST8	0.777034	-0.698608	-0.423883	0.0218698	-0.443048	-0.555265
ACH-000493	liver	hepatocellular_carcinoma	SNU-423	0.777472	-0.331895	-0.379185	0.0151125	-0.450411	-0.546704
ACH-000869	lung	NSCLC	NCI-H1568	0.782031	-0.464598	-0.663747	-0.112888	-0.470682	-0.155894
ACH-000411	kidney	renal_cell_carcinoma	769-P	0.782172	-0.0242694	-0.161521	-0.0257352	-0.377596	-0.489401
ACH-000181	upper_aerodigestive	upper_aerodigestive_squamous	SCC-9	0.785525	#N/A	#N/A	#N/A	#N/A	#N/A
ACH-000751	blood	AML	OCI-M1	0.789936	#N/A	#N/A	#N/A	#N/A	#N/A
ACH-001848	bile_duct	cholangiocarcinoma	ICC8	0.792527	-0.109355	-0.723461	-0.0430454	-0.557727	-0.461593
ACH-002015	eye	uveal_melanoma	Mel285	0.793082	-0.404849	-1.06781	0.118691	-0.356092	-0.353499
ACH-000066	lung	NSCLC	HCC4006	0.793282	#N/A	#N/A	#N/A	#N/A	#N/A
ACH-000543	central_nervous_system	glioma	SNU-489	0.794506	#N/A	#N/A	#N/A	#N/A	#N/A
ACH-001369	ovary	ovary_adenocarcinoma	OCI-C5x	0.800292	-0.531787	-0.36262	0.1138	-0.470224	-0.424914
ACH-000213	pancreas	exocrine	HUP-T4	0.800699	#N/A	#N/A	#N/A	#N/A	#N/A
ACH-000764	gastric	gastric_adenocarcinoma	SH-10-TC	0.802056	-0.284542	-0.211124	-0.321547	-0.829064	-0.294067
ACH-001373	ovary	ovary_adenocarcinoma	OV17R	0.802183	#N/A	#N/A	#N/A	#N/A	#N/A
ACH-000515	lung	SCLC	HCC-33	0.802813	#N/A	#N/A	#N/A	#N/A	#N/A
ACH-000186	lung	NSCLC	NCI-H2444	0.803244	#N/A	#N/A	#N/A	#N/A	#N/A
ACH-000144	gastric	gastric_adenocarcinoma	RERF-GC-1B	0.808392	#N/A	#N/A	#N/A	#N/A	#N/A
ACH-000992	upper_aerodigestive	upper_aerodigestive_squamous	BICR 18	0.810086	#N/A	#N/A	#N/A	#N/A	#N/A
ACH-000496	lung	NSCLC	NCI-H1792	0.810255	-0.2025	-0.307386	-0.0560594	-0.350392	-0.522449
ACH-001379	pancreas	exocrine	PACADD-161	0.811498	-0.286599	-0.660461	-0.0357081	-0.487912	-0.541001
ACH-000483	liver	hepatocellular_carcinoma	SNU-182	0.812087	-1.38378	0.0800135	-0.00873528	-0.33095	-0.412418
ACH-001232	central_nervous_system	medulloblastoma	UW228	0.812528	-0.153856	0.182547	-0.0254694	-0.475951	-0.313003
ACH-000738	central_nervous_system	glioma	GB-1	0.812968	-0.600585	-0.816416	-0.0177496	-0.444493	-0.381525
ACH-000757	lung	NSCLC	A427	0.813217	-0.702088	-0.156607	-0.192006	-0.338319	-0.501957
ACH-000237	ovary	ovary_adenocarcinoma	JHOM-1	0.814555	-0.285301	-0.439018	-0.13371	-0.390165	-0.557866
ACH-000367	lung	NSCLC	NCI-H226	0.814634	#N/A	#N/A	#N/A	#N/A	#N/A
ACH-000607	soft_tissue	malignant_rhabdoid_tumor	KYM1	0.815278	-0.234239	-0.255427	-0.234764	-0.205797	-0.339586
ACH-000548	upper_aerodigestive	upper_aerodigestive_squamous	BHY	0.815941	-1.13812	-0.372427	-0.0276674	-0.673348	-0.198631
ACH-000544	esophagus	esophagus_squamous	OE21	0.81684	-0.459232	-0.228087	-0.0349996	-0.528729	-0.350208
ACH-000614	skin	melanoma	RVH-421	0.817772	-0.57225	-0.515539	0.331117	-0.281602	-0.599909
ACH-000476	liver	hepatocellular_carcinoma	JHH-4	0.819431	-0.243923	-0.61478	-0.404602	-0.668921	-0.489613
ACH-000863	central_nervous_system	glioma	DBTRG-05MG	0.819859	#N/A	#N/A	#N/A	#N/A	#N/A
ACH-001673	bile_duct	cholangiocarcinoma	TFK-1	0.823093	-0.139632	-0.521649	0.0858354	-0.315453	-0.359406
ACH-001529	uterus	choriocarcinoma	JAR	0.82379	-0.601249	0.193864	-0.111788	-0.289467	-0.175804
ACH-001619	bile_duct	gallbladder_adenocarcinoma	OCUG-1	0.824135	-0.146325	-0.468568	0.298917	-0.370875	-0.151573
ACH-001356	thyroid	thyroid_carcinoma	MB-1	0.824478	-0.555083	0.108982	-0.00140477	-0.263048	-0.244264
ACH-000346	blood	CLL	JVM-3	0.824578	#N/A	#N/A	#N/A	#N/A	#N/A
ACH-001399	colorectal	colorectal_adenocarcinoma	SW 626	0.825988	#N/A	#N/A	#N/A	#N/A	#N/A
ACH-000834	urinary_tract	bladder_carcinoma	UM-UC-1	0.827122	-0.315696	-0.502827	-0.117453	-0.598775	-0.42622
ACH-000344	gastric	gastric_adenocarcinoma	SNU-668	0.828731	-0.141094	-0.642847	0.181133	-0.504291	-0.217269
ACH-001390	breast	breast_ductal_carcinoma	SUM-149PT	0.829781	-0.71087	-0.292432	0.124652	-0.545118	-0.1053
ACH-000558	central_nervous_system	glioma	A172	0.830173	#N/A	#N/A	#N/A	#N/A	#N/A
ACH-000875	lung	NSCLC	NCI-H2347	0.830719	#N/A	#N/A	#N/A	#N/A	#N/A
ACH-000360	colorectal	caecum_adenocarcinoma	NCI-H508	0.832691	#N/A	#N/A	#N/A	#N/A	#N/A
ACH-001415	urinary_tract	bladder_carcinoma	UM-UC-7	0.832836	-0.782726	-0.367765	-0.0030371	-0.499882	-0.630823
ACH-000218	blood	AML	PL-21	0.833397	#N/A	#N/A	#N/A	#N/A	#N/A
ACH-001421	eye	retinoblastoma	WERI-Rb1	0.833829	#N/A	#N/A	#N/A	#N/A	#N/A
ACH-000682	upper_aerodigestive	upper_aerodigestive_squamous	SNU-1066	0.83599	-0.331783	-0.0442937	0.0318401	-0.775912	-0.605992
ACH-000793	gastric	gastric_adenocarcinoma	KATO III	0.836658	-0.500578	0.0285975	-0.161264	-0.487386	-0.561126
ACH-000158	lymphocyte	non_hodgkin_lymphoma	OCI-LY3	0.837308	#N/A	#N/A	#N/A	#N/A	#N/A
ACH-000420	liver	hepatocellular_carcinoma	SNU-449	0.837362	-0.505715	-0.307264	0.0307097	-0.627261	-0.589507
ACH-000118	pancreas	exocrine	HUP-T3	0.837894	-0.0293343	-0.648538	0.0141518	-0.320304	-0.242378
ACH-001075	lung	NSCLC	NCI-H292	0.837966	-0.707669	-0.325906	0.299638	-0.473547	-0.360858
ACH-000129	lung	SCLC	NCI-H1341	0.838148	#N/A	#N/A	#N/A	#N/A	#N/A
ACH-000433	kidney	renal_cell_carcinoma	Caki-1	0.838524	-0.704904	-0.853577	-0.0280141	-0.664304	-0.463168
ACH-000776	central_nervous_system	medulloblastoma	ONS-76	0.838911	-0.0685066	-0.352124	-0.0978078	-0.339567	-0.497777
ACH-001997	bile_duct	cholangiocarcinoma	ECC2	0.83909	-0.893557	-0.67448	0.0527781	-0.47477	-0.366165
ACH-001400	cervix	cervical_squamous	SW 954	0.839794	#N/A	#N/A	#N/A	#N/A	#N/A
ACH-000054	soft_tissue	fibrosarcoma	HT-1080	0.840402	-0.179751	-0.104411	-0.126169	-0.448606	-0.509062
ACH-001528	thyroid	thyroid_carcinoma	IHH-4	0.84331	#N/A	#N/A	#N/A	#N/A	#N/A
ACH-001353	pancreas	exocrine	JOPACA-1	0.844279	-0.366528	-0.668174	-0.0193244	-0.569418	-0.423893
ACH-000447	lung	NSCLC	NCI-H2228	0.8445	#N/A	#N/A	#N/A	#N/A	#N/A
ACH-000456	thyroid	thyroid_carcinoma	B-CPAP	0.845134	#N/A	#N/A	#N/A	#N/A	#N/A
ACH-000212	breast	breast_carcinoma	CAL-120	0.845242	-0.747822	-0.571734	-0.194549	-0.554865	-0.640677
ACH-001033	bone	Ewing_sarcoma	CHLA57	0.845502	-0.179436	-0.161845	-0.0252943	-0.267865	-0.356434
ACH-000778	upper_aerodigestive	upper_aerodigestive_squamous	HSC-3	0.845853	-0.855587	-0.258733	-0.0722868	-0.506922	-0.259146
ACH-000880	gastric	gastric_adenocarcinoma	AGS	0.845915	-0.748999	-0.197873	0.0575347	-0.550254	-0.560474
ACH-000053	lymphocyte	non_hodgkin_lymphoma	KARPAS-299	0.845929	-0.122061	0.102415	0.0201076	-0.0970936	-0.29014
ACH-000563	lung	NSCLC	EBC-1	0.846013	-0.00692849	-0.974264	-0.0560816	-0.422599	-0.564997
ACH-001509	upper_aerodigestive	upper_aerodigestive_squamous	H357	0.84745	-0.694207	-0.193192	-0.136093	-0.623295	-0.397828
ACH-000724	urinary_tract	bladder_carcinoma	HT-1376	0.849059	-0.956984	-0.482172	-0.13961	-1.20249	-0.524842
ACH-000313	kidney	renal_cell_carcinoma	KMRC-3	0.849106	#N/A	#N/A	#N/A	#N/A	#N/A
ACH-001688	kidney	NA	UM-RC-7	0.850418	#N/A	#N/A	#N/A	#N/A	#N/A
ACH-001513	cervix	cervical_adenocarcinoma	HCA-1	0.850546	0.095292	0.0799274	0.117459	-0.24908	-0.25508
ACH-001332	upper_aerodigestive	upper_aerodigestive_squamous	BICR 78	0.851431	-0.347961	-0.289288	0.311408	-0.701252	-0.312644
ACH-000133	fibroblast	fibroblast_soft_tissue	HS 729	0.851945	-0.325148	-0.0168903	-0.0400541	-0.877814	-0.36838
ACH-001211	soft_tissue	malignant_rhabdoid_tumor	TTC-549	0.852444	#N/A	-0.278399	-0.150531	-0.495142	-0.573223
ACH-000946	uterus	endometrial_adenocarcinoma	HEC-265	0.85255	-0.288764	-0.2066	-0.0748663	-0.685274	-0.301655
ACH-000292	lung	SCLC	NCI-H841	0.852654	-0.885174	-0.0296321	-0.302994	-0.475255	-0.530906
ACH-001210	soft_tissue	malignant_rhabdoid_tumor	TTC-1240	0.852968	#N/A	#N/A	#N/A	#N/A	#N/A
ACH-000217	liver	hepatocellular_carcinoma	JHH-6	0.854068	-0.547074	-0.0871801	0.0113807	-0.586532	-0.299695
ACH-002042	thyroid	thyroid_squamous	T3M-5	0.854148	#N/A	#N/A	#N/A	#N/A	#N/A
ACH-001344	peripheral_nervous_system	neuroblastoma	GI-ME-N	0.856567	-0.672587	-1.0144	-0.360528	-0.610067	-0.404711
ACH-000383	esophagus	esophagus_adenocarcinoma	OE33	0.858423	-0.0730151	-0.772632	-0.0507651	-0.724796	-0.545185
ACH-001437	embryo	embryo_carcinoma	1618-K	0.85889	#N/A	#N/A	#N/A	#N/A	#N/A
ACH-000897	thyroid	thyroid_carcinoma	FTC-238	0.859284	#N/A	#N/A	#N/A	#N/A	#N/A
ACH-000663	ovary	ovary_adenocarcinoma	OVTOKO	0.859954	-0.488114	-0.339115	-0.184618	-0.338753	-0.527866
ACH-000643	breast	breast_ductal_carcinoma	HDQ-P1	0.860083	#N/A	#N/A	#N/A	#N/A	#N/A
ACH-000748	bone	osteosarcoma	SJSA-1	0.860579	-0.25153	-0.365408	-0.0777863	-0.450691	-0.336936
ACH-000449	soft_tissue	uterine_sarcoma	MES-SA	0.862313	#N/A	#N/A	#N/A	#N/A	#N/A
ACH-001626	upper_aerodigestive	upper_aerodigestive_squamous	OSC-20	0.862518	#N/A	#N/A	#N/A	#N/A	#N/A
ACH-000941	uterus	endometrial_adenocarcinoma	HEC-1-B	0.862746	-0.276735	0.261777	-0.221077	-0.473831	-0.252299
ACH-000528	lung	NSCLC	ABC-1	0.862784	-0.930003	-0.248676	-0.0228431	-1.09161	-0.29034
ACH-001099	soft_tissue	malignant_rhabdoid_tumor	KD	0.862859	-0.284594	-0.400056	-0.0093027	-0.438192	-0.598539
ACH-000371	lymphocyte	non_hodgkin_lymphoma	RL	0.862966	#N/A	#N/A	#N/A	#N/A	#N/A
ACH-000511	lung	NSCLC	Calu-1	0.863051	-0.532418	-0.479541	0.0190186	-0.242789	-0.575961
ACH-000740	upper_aerodigestive	upper_aerodigestive_squamous	A-253	0.863364	-0.246909	-0.205563	-0.128018	-0.272366	-0.455768
ACH-000454	lung	NSCLC	HCC-95	0.863705	-0.268344	-0.301907	0.238096	-0.804867	-0.642831
ACH-000431	lung	SCLC	NCI-H1694	0.86378	-0.043684	0.0713623	0.334023	-0.512834	-0.405317
ACH-000365	lymphocyte	non_hodgkin_lymphoma	SU-DHL-4	0.865171	-0.176224	-0.0876468	0.00224524	-0.482064	-0.197065
ACH-000553	lung	NSCLC	Sq-1	0.865348	#N/A	#N/A	#N/A	#N/A	#N/A
ACH-000040	central_nervous_system	glioma	U-118 MG	0.865547	-0.346947	-0.0114796	0.29053	-0.444042	-0.457785
ACH-000406	blood	AML	U-937	0.866084	-0.134044	0.0152799	0.129604	-0.152644	-0.332554
ACH-001310	engineered_kidney	NA	HA1E	0.866351	#N/A	#N/A	#N/A	#N/A	#N/A
ACH-000883	central_nervous_system	glioma	SW 1783	0.866594	#N/A	#N/A	#N/A	#N/A	#N/A
ACH-000802	urinary_tract	bladder_carcinoma	BFTC-905	0.866792	-0.160686	-0.194934	0.0577156	-0.689244	-0.606742
ACH-001536	bile_duct	cholangiocarcinoma	KKU-100	0.867562	-0.409214	-0.850732	0.0297636	-0.427044	-0.449077
ACH-001959	bile_duct	cholangiocarcinoma	CC-LP-1	0.867567	-0.564224	-0.800211	0.0844905	-0.421184	-0.630094
ACH-000788	skin	melanoma	A2058	0.86787	-0.133963	-0.146507	-0.0347494	-0.342324	-0.344395
ACH-001862	bile_duct	cholangiocarcinoma	TGBC52TKB	0.869387	-0.140278	-0.858406	-0.0626095	-0.432841	-0.720535
ACH-000973	urinary_tract	bladder_carcinoma	639-V	0.869445	-0.615356	-0.0118056	0.00984661	-0.455481	-0.568917
ACH-000631	central_nervous_system	glioma	KS-1	0.869967	#N/A	#N/A	#N/A	#N/A	#N/A
ACH-001858	bile_duct	cholangiocarcinoma	SSP-25	0.870678	-0.874074	-0.483629	0.0457783	-0.811182	-0.379854
ACH-000384	urinary_tract	bladder_carcinoma	SW 780	0.870975	#N/A	#N/A	#N/A	#N/A	#N/A
ACH-000911	gastric	gastric_adenocarcinoma	NUGC-3	0.870988	-0.262023	-0.307971	0.102968	-0.464375	-0.288478
ACH-000145	soft_tissue	leiomyosarcoma	SK-LMS-1	0.871963	#N/A	#N/A	#N/A	#N/A	#N/A
ACH-001715	bone	osteosarcoma	CAL-72	0.872422	-0.477798	-0.393163	0.209484	-0.412171	-0.302489
ACH-000293	uterus	endometrial_adenocarcinoma	KLE	0.872863	-0.298546	-0.385847	-0.0589203	-0.475225	-0.697199
ACH-001854	engineered_bile_duct	NA	MMNK-1	0.872866	#N/A	#N/A	#N/A	#N/A	#N/A
ACH-000388	lymphocyte	non_hodgkin_lymphoma	NU-DHL-1	0.873063	#N/A	#N/A	#N/A	#N/A	#N/A
ACH-000407	uterus	MMMT	SNU-685	0.873342	-0.496155	-0.0396508	0.0597049	-0.330291	-0.365178
ACH-001542	upper_aerodigestive	upper_aerodigestive_squamous	KON	0.874484	-0.486483	-0.5766	0.0878307	-0.670981	-0.361838
ACH-000364	bone	osteosarcoma	U-2 OS	0.874557	-0.927078	-0.366146	-0.1647	-0.698475	-0.339304
ACH-000630	upper_aerodigestive	upper_aerodigestive_squamous	YD-8	0.874617	-0.531673	-0.56258	-0.0609582	-0.73289	-0.55374
ACH-000410	bone	osteosarcoma	Saos-2	0.874971	-0.159676	0.0503352	-0.0879255	-0.269473	-0.357176
ACH-000872	lung	NSCLC	HCC515	0.875078	-0.844215	-0.609528	0.020698	-0.352153	-0.240418
ACH-000307	pancreas	exocrine	PK-1	0.875858	-0.45253	-0.264977	0.0666518	-0.407305	-0.552002
ACH-000981	blood	ALL	DND-41	0.875996	#N/A	#N/A	#N/A	#N/A	#N/A
ACH-000076	blood	CML	NCO2	0.876063	-0.257557	-0.0270974	0.238673	-0.437203	-0.266837
ACH-001656	blood	AML	SKNO1	0.87715	#N/A	#N/A	#N/A	#N/A	#N/A
ACH-000301	blood	CML	LAMA-84	0.877313	#N/A	#N/A	#N/A	#N/A	#N/A
ACH-000289	central_nervous_system	glioma	SNU-466	0.878082	#N/A	#N/A	#N/A	#N/A	#N/A
ACH-000113	blood	AML	OCI-AML2	0.879166	-0.261218	-0.191073	0.053299	-0.468365	-0.348552
ACH-001096	soft_tissue	rhabdomyosarcoma	JR-1	0.879271	-0.162416	-0.400304	0.0515766	-0.530893	-0.47696
ACH-000862	urinary_tract	bladder_carcinoma	KMBC-2	0.879369	-0.0046983	0.0909827	-0.201798	-0.547493	-0.459048
ACH-000082	bone	osteosarcoma	G-292, clone A141B1	0.879851	-0.365631	-0.606894	0.196155	-0.464605	-0.208798
ACH-001654	esophagus	esophagus_adenocarcinoma	SK-GT-4	0.879859	-0.117493	-0.100308	0.0449925	-0.511157	-0.553116
ACH-000174	thyroid	thyroid_carcinoma	CAL-62	0.880183	-0.520296	-0.333559	0.0298868	-0.475911	-0.434632
ACH-000500	upper_aerodigestive	upper_aerodigestive_squamous	SNU-46	0.880622	-0.314439	-0.05791	0.284221	-0.80399	-0.528919
ACH-000091	ovary	ovary_adenocarcinoma	OV56	0.880688	#N/A	#N/A	#N/A	#N/A	#N/A
ACH-000138	pancreas	exocrine	CFPAC-1	0.88114	0.0355955	-0.708992	-0.295634	-0.692071	-0.581807
ACH-000281	pancreas	exocrine	KP-2	0.881662	-0.602363	-0.461899	-0.00460705	-0.549206	-0.519023
ACH-001686	lymphocyte	lymphoma_unspecified	ULA	0.881867	#N/A	#N/A	#N/A	#N/A	#N/A
ACH-001696	upper_aerodigestive	upper_aerodigestive_squamous	UPCI-SCC-111	0.882747	#N/A	#N/A	#N/A	#N/A	#N/A
ACH-000191	thyroid	thyroid_carcinoma	BHT-101	0.882907	#N/A	#N/A	#N/A	#N/A	#N/A
ACH-000389	central_nervous_system	glioma	H4	0.883385	-0.434988	-0.263256	0.00349452	-0.6221	-0.463001
ACH-000920	blood	CML	CML-T1	0.88394	#N/A	#N/A	#N/A	#N/A	#N/A
ACH-000326	blood	CML	JURL-MK1	0.884244	-0.247409	0.000597266	-0.0514519	-0.346917	-0.0756058
ACH-000445	central_nervous_system	glioma	KNS-60	0.88445	-0.228713	-0.06015	-0.04746	-0.612153	-0.549924
ACH-001707	blood	CLL	WA-OSEL	0.88464	#N/A	#N/A	#N/A	#N/A	#N/A
ACH-000167	#N/A	#N/A	#N/A	0.884918	-0.403427	-0.102839	0.0180569	-0.452248	-0.351485
ACH-000746	gastric	gastric_adenocarcinoma	GSS	0.884938	-0.287287	-0.151543	0.0998473	-0.303195	-0.0957214
ACH-001653	gastric	gastric_adenocarcinoma	SK-GT-2	0.886252	-0.244638	-0.449433	-0.0974335	-0.650736	-0.337099
ACH-000711	breast	breast_ductal_carcinoma	JIMT-1	0.886543	-0.0513393	-0.676363	0.0700647	-0.490673	-0.35654
ACH-000316	liver	hepatocellular_carcinoma	SNU-886	0.886593	-0.599197	-0.548127	-0.046595	-0.579726	-0.608093
ACH-000401	skin	melanoma	COLO-800	0.887613	-0.0627035	-0.369315	0.029859	-0.348738	-0.493515
ACH-000418	bone	chondrosarcoma	SW 1353	0.888608	#N/A	#N/A	#N/A	#N/A	#N/A
ACH-000838	plasma_cell	multiple_myeloma	AMO-1	0.888821	-0.232471	-0.00235549	0.0118781	-0.33688	-0.203982
ACH-001548	peripheral_nervous_system	neuroblastoma	LS	0.888908	-0.43895	0.364931	-0.224409	-0.389799	-0.572511
ACH-000956	prostate	prostate_adenocarcinoma	22Rv1	0.889608	#N/A	#N/A	#N/A	#N/A	#N/A
ACH-000208	central_nervous_system	glioma	U-178	0.889918	#N/A	#N/A	#N/A	#N/A	#N/A
ACH-000172	soft_tissue	malignant_rhabdoid_tumor	TM-87	0.88998	-0.432933	-0.443463	-0.0992116	-0.284894	-0.203732
ACH-001999	pancreas	exocrine	950-5-BIK	0.890035	-0.694283	-0.44412	0.176274	-0.980781	-0.301744
ACH-000080	blood	AML	BDCM	0.89028	#N/A	#N/A	#N/A	#N/A	#N/A
ACH-000781	lung	NSCLC	NCI-H2023	0.891112	-0.106508	-0.277341	-0.0847187	-0.513464	-0.576127
ACH-000593	urinary_tract	bladder_carcinoma	BC-3C	0.891203	-0.27308	-0.0139684	-0.0714807	-0.581203	-0.561255
ACH-000163	thyroid	thyroid_squamous	SW579	0.89178	-0.154896	-0.452429	-0.0655761	-0.209693	-0.309058
ACH-000730	skin	melanoma	SK-MEL-5	0.891923	#N/A	#N/A	#N/A	#N/A	#N/A
ACH-000105	blood	ALL	ALL-SIL	0.891976	#N/A	#N/A	#N/A	#N/A	#N/A
ACH-000684	kidney	renal_cell_carcinoma	KMRC-1	0.892135	-0.325894	-0.563659	-0.0707813	-0.489301	-0.572429
ACH-000647	esophagus	esophagus_squamous	TE-1	0.892136	-0.149832	0.180761	0.143307	-0.5849	-0.719588
ACH-000201	soft_tissue	malignant_rhabdoid_tumor	A-204	0.892152	#N/A	#N/A	#N/A	#N/A	#N/A
ACH-000314	lung	NSCLC	HCC-2108	0.892786	#N/A	#N/A	#N/A	#N/A	#N/A
ACH-000547	urinary_tract	bladder_carcinoma	HT-1197	0.893032	-1.35048	-0.728317	-0.210715	-0.78572	-0.501026
ACH-001624	central_nervous_system	glioma	Onda 9	0.893173	-0.0175326	-0.338567	-0.256535	-0.519151	-0.738831
ACH-000509	lymphocyte	non_hodgkin_lymphoma	HuT 78	0.89369	#N/A	#N/A	#N/A	#N/A	#N/A
ACH-000256	ovary	ovary_adenocarcinoma	COV318	0.89378	-0.744015	-0.384687	-0.11781	-0.650878	-0.755446
ACH-000732	upper_aerodigestive	upper_aerodigestive_squamous	PE/CA-PJ41 (clone D2)	0.893793	-0.935734	-0.41367	0.18673	-0.556167	0.0250334
ACH-000914	lymphocyte	non_hodgkin_lymphoma	HT	0.893858	-0.0294885	-0.0293934	-0.101568	-0.314776	-0.331018
ACH-000692	upper_aerodigestive	upper_aerodigestive_squamous	SNU-899	0.8939	#N/A	#N/A	#N/A	#N/A	#N/A
ACH-000974	uterus	endometrial_adenocarcinoma	SNG-M	0.894123	-0.178158	-0.288273	-0.0914728	-0.359476	-0.464011
ACH-001510	upper_aerodigestive	upper_aerodigestive_squamous	H376	0.894372	-0.412249	-0.0312155	0.00372114	-0.524081	-0.334189
ACH-000667	lung	NSCLC	HCC-44	0.894682	-0.316881	-0.086387	0.168262	-0.461165	-0.634971
ACH-000833	soft_tissue	rhabdomyosarcoma	RH-30	0.895364	-0.1398	0.0314695	-0.0891393	-0.395841	-0.0283958
ACH-000545	urinary_tract	bladder_carcinoma	VM-CUB1	0.895369	-0.140489	-0.353995	0.0249624	-0.582546	-0.432206
ACH-001849	bile_duct	cholangiocarcinoma	ICC9	0.895611	-0.460207	-0.255143	-0.136056	-0.778939	-0.451439
ACH-001628	ovary	ovary_adenocarcinoma	PEA1	0.89659	-0.246615	-0.28166	-0.0039952	-0.555047	-0.68789
ACH-001494	bile_duct	cholangiocarcinoma	EGI-1	0.896946	-0.474857	-0.784403	-0.0566279	-0.451104	-0.464521
ACH-000792	kidney	renal_cell_carcinoma	BFTC-909	0.897094	-0.255505	-0.0854169	-0.17999	-0.428378	-0.586759
ACH-000728	blood	ALL	KASUMI-2	0.898397	#N/A	#N/A	#N/A	#N/A	#N/A
ACH-000453	plasma_cell	multiple_myeloma	MOLP-2	0.898704	#N/A	#N/A	#N/A	#N/A	#N/A
ACH-000372	blood	ALL	P12-ICHIKAWA	0.899897	#N/A	#N/A	#N/A	#N/A	#N/A
ACH-000122	blood	ALL	SUP-T11	0.900284	#N/A	#N/A	#N/A	#N/A	#N/A
ACH-000566	urinary_tract	bladder_carcinoma	SW-1710	0.900451	#N/A	#N/A	#N/A	#N/A	#N/A
ACH-000618	upper_aerodigestive	upper_aerodigestive_squamous	SNU-1041	0.900715	-0.163693	-0.188532	-0.0560143	-0.495687	-0.306029
ACH-000905	urinary_tract	bladder_carcinoma	5637	0.90092	-0.863883	-0.302866	-0.0737846	-0.526887	-0.26207
ACH-000637	esophagus	esophagus_squamous	KYSE-520	0.901277	-0.296791	0.104138	-0.0316909	-0.34146	-0.260418
ACH-000152	central_nervous_system	glioma	M059K	0.901338	-0.612011	-0.132265	-0.0890337	-0.529892	-0.472813
ACH-001838	bile_duct	cholangiocarcinoma	ICC12	0.901393	-0.131695	-0.619178	-0.383019	-0.667983	-0.552082
ACH-000211	central_nervous_system	medulloblastoma	Daoy	0.901818	-0.136391	0.0743768	0.0965295	-0.455738	-0.435082
ACH-001525	cervix	cervical_carcinoma	HT-3	0.902924	-0.599643	-0.0613145	-0.183498	-0.606944	-0.487703
ACH-001702	soft_tissue	epithelioid_sarcoma	VA-ES-BJ	0.902925	-0.143252	0.0783623	-0.00602601	-0.442686	-0.372636
ACH-000065	blood	AML	OCI-AML5	0.903265	#N/A	#N/A	#N/A	#N/A	#N/A
ACH-000569	mesothelioma	mesothelioma	IST-MES1	0.903913	#N/A	#N/A	#N/A	#N/A	#N/A
ACH-000014	skin	melanoma	Hs 294T	0.904171	0.0521932	-0.0908879	0.162898	-0.462183	-0.354347
ACH-000753	urinary_tract	bladder_carcinoma	JMSU-1	0.904248	-0.442281	-0.393475	0.0524129	-0.479384	-0.749374
ACH-000266	pancreas	exocrine	SNU-213	0.905278	-0.636049	-0.806541	-0.0624381	-0.76504	-0.407638
ACH-000845	lung	NSCLC	NCI-H1373	0.905339	0.0887049	-0.682539	-0.156747	-0.547678	-0.197937
ACH-001374	ovary	mixed_germ_cell	PA-1	0.905531	-1.06039	-0.346439	0.0811701	-0.0862286	-0.641707
ACH-000832	upper_aerodigestive	upper_aerodigestive_squamous	Cal 27	0.905599	-0.299303	-0.545835	0.201431	-0.587059	-0.357683
ACH-000995	blood	ALL	JURKAT	0.905666	-0.0752763	-0.24625	0.0423465	-0.278646	-0.469528
ACH-000242	urinary_tract	bladder_carcinoma	RT4	0.905711	#N/A	#N/A	#N/A	#N/A	#N/A
ACH-000972	uterus	endometrial_adenocarcinoma	HEC-151	0.905896	#N/A	#N/A	#N/A	#N/A	#N/A
ACH-000244	central_nervous_system	glioma	DK-MG	0.905935	-0.550738	-0.480991	0.0597019	-0.261415	-0.257659
ACH-001638	lymphocyte	lymphoma_unspecified	RC-K8	0.906317	#N/A	#N/A	#N/A	#N/A	#N/A
ACH-000774	lung	NSCLC	RERF-LC-Ad2	0.90641	-0.842809	-0.634262	0.18445	-0.394401	-0.30877
ACH-000193	plasma_cell	multiple_myeloma	KARPAS-620	0.906991	#N/A	#N/A	#N/A	#N/A	#N/A
ACH-000517	pancreas	exocrine	SNU-410	0.906994	-0.405693	-0.727771	-0.0200355	-0.559237	-0.535241
ACH-000248	breast	breast_adenocarcinoma	AU565	0.907205	-0.608557	-0.245801	0.0471387	-0.750132	-0.86174
ACH-000075	central_nervous_system	glioma	U-87 MG	0.907214	-0.102345	-0.07034	-0.210733	-0.462977	-0.217217
ACH-000635	ovary	ovary_adenocarcinoma	SNU-119	0.9077	#N/A	#N/A	#N/A	#N/A	#N/A
ACH-000096	kidney	malignant_rhabdoid_tumor	G-401	0.907743	-0.861978	-0.308197	-0.204798	-0.598636	-0.634007
ACH-000796	ovary	ovary_adenocarcinoma	MCAS	0.907916	-0.157288	-0.603169	-0.000236273	-0.439909	-0.395942
ACH-000534	lymphocyte	non_hodgkin_lymphoma	WSU-DLCL2	0.908477	#N/A	#N/A	#N/A	#N/A	#N/A
ACH-000280	ovary	brenner_tumor	SNU-840	0.908666	-0.439676	-0.640712	-0.092069	-0.560171	-0.301193
ACH-001608	central_nervous_system	glioma	NP 2	0.908705	-0.329374	-0.119103	0.0346584	-0.469116	-0.357699
ACH-001750	soft_tissue	rhabdomyosarcoma	TTC-442	0.909295	-0.579202	-0.171818	0.0117684	-0.746632	-0.428408
ACH-000486	urinary_tract	bladder_carcinoma	KU-19-19	0.909762	-0.235761	-0.533309	-0.307414	-0.659196	-0.335768
ACH-000466	gastric	gastric_adenocarcinoma	SNU-216	0.909986	-0.367904	-1.08579	-0.320569	-0.76505	-0.652736
ACH-000467	colorectal	colorectal_adenocarcinoma	HCC-56	0.91045	-0.436627	0.34318	-0.0544355	-0.251785	-0.4296
ACH-000249	colorectal	colorectal_adenocarcinoma	CL-11	0.910802	-1.05561	-0.0668782	0.132504	-0.554691	-0.256459
ACH-000537	liver	hepatocellular_carcinoma	SNU-761	0.910978	-0.497859	-0.962956	-0.0353751	-0.502203	-0.373475
ACH-000624	breast	breast_ductal_carcinoma	HCC1806	0.911159	-0.16718	-0.249966	-0.048035	-0.507862	-0.333433
ACH-000881	skin	melanoma	MEL-JUSO	0.911367	-0.225661	-0.795415	0.0454251	-0.443124	-0.408992
ACH-000329	central_nervous_system	glioma	CCF-STTG1	0.911472	-0.129428	0.186075	0.0731132	-0.25718	-0.393241
ACH-000586	lung	SCLC	NCI-H1876	0.911633	#N/A	#N/A	#N/A	#N/A	#N/A
ACH-000052	bone	Ewing_sarcoma	A-673	0.912097	-0.242938	-0.11153	-0.0468213	-0.479204	-0.522279
ACH-000318	esophagus	esophagus_squamous	TE-10	0.91225	-0.234051	-0.0965126	-0.023937	-0.533068	-0.286065
ACH-001765	soft_tissue	rhabdomyosarcoma	RH4	0.912563	-0.119663	-0.231056	-0.0772566	-0.741851	-0.397951
ACH-001163	#N/A	#N/A	#N/A	0.913028	-0.145666	-0.0222764	0.0157623	-0.452258	-0.517523
ACH-000843	lung	NSCLC	HARA	0.913344	-0.145866	-0.297808	-0.0682954	-0.525931	-0.369516
ACH-000997	colorectal	colorectal_adenocarcinoma	HCT-15	0.913973	#N/A	#N/A	#N/A	#N/A	#N/A
ACH-000620	liver	hepatocellular_carcinoma	JHH-1	0.914262	-0.0316569	0.130616	-0.0787549	-0.356869	-0.458814
ACH-000308	ovary	ovary_adenocarcinoma	EFO-21	0.914265	-0.328918	-0.394358	-0.0869688	-0.385644	-0.478379
ACH-000638	lung	NSCLC	NCI-H441	0.915199	-0.0508889	-0.127064	0.125568	-0.438014	-0.0498039
ACH-001306	thyroid	thyroid_carcinoma	8305C	0.915392	-0.680458	-0.316053	-0.171684	-0.285818	-0.410051
ACH-001431	bone	Ewing_sarcoma	TC205	0.915455	-0.0739511	-0.0480698	-0.0804191	-0.435928	-0.449388
ACH-000006	blood	AML	MONO-MAC-6	0.915541	#N/A	#N/A	#N/A	#N/A	#N/A
ACH-000475	liver	hepatocellular_carcinoma	huH-1	0.915673	-0.169998	0.0992243	-0.0651686	-0.429119	-0.440057
ACH-000580	skin	melanoma	C32	0.915743	-0.271576	0.0646656	0.0853222	-0.410054	-0.476864
ACH-000929	lung	NSCLC	NCI-H2110	0.91595	-0.422119	0.0250339	0.14561	-0.51241	-0.636125
ACH-001318	liver	hepatocellular_carcinoma	PLC/PRF/5	0.916099	-0.269293	0.248215	0.18901	-0.393448	-0.294979
ACH-000892	lung	NSCLC	NCI-H1563	0.916436	#N/A	#N/A	#N/A	#N/A	#N/A
ACH-000062	lung	NSCLC	RERF-LC-MS	0.916442	#N/A	#N/A	#N/A	#N/A	#N/A
ACH-000146	blood	AML	THP-1	0.916464	-0.0201036	0.0780067	0.185749	-0.306681	-0.244337
ACH-000704	ovary	ovary_carcinoma	OAW42	0.916612	#N/A	#N/A	#N/A	#N/A	#N/A
ACH-000514	lung	SCLC	NCI-H1092	0.916625	-0.311803	-0.286693	-0.136098	-0.415797	-0.291831
ACH-000741	urinary_tract	bladder_carcinoma	U-BLC1	0.91666	#N/A	#N/A	#N/A	#N/A	#N/A
ACH-000823	esophagus	esophagus_squamous	KYSE-140	0.916903	0.0171421	0.051909	0.0348058	-0.311494	-0.405196
ACH-000932	gastric	gastric_adenocarcinoma	SNU-1	0.917683	-0.929436	-0.221903	-0.0481955	-0.429895	-0.403376
ACH-001384	thyroid	thyroid_carcinoma	RO82-W-1	0.917818	#N/A	#N/A	#N/A	#N/A	#N/A
ACH-000073	lymphocyte	non_hodgkin_lymphoma	GRANTA-519	0.91787	#N/A	#N/A	#N/A	#N/A	#N/A
ACH-000375	soft_tissue	malignant_rhabdoid_tumor	G-402	0.918164	-0.416193	-0.136334	-0.11451	-0.377481	-0.470855
ACH-001655	uterus	endometrial_squamous	SKN	0.918212	-0.197335	-0.18898	0.425769	-0.506314	-0.266742
ACH-001459	colorectal	colorectal_adenocarcinoma	C80	0.918221	-0.945912	-0.0233453	0.0942146	-0.25263	-0.317529
ACH-000428	kidney	renal_cell_carcinoma	UO-31	0.918241	#N/A	#N/A	#N/A	#N/A	#N/A
ACH-000279	bone	Ewing_sarcoma	EWS502	0.918536	-0.206233	-0.0304799	-0.0503948	-0.413462	-0.519192
ACH-000060	pancreas	exocrine	Panc 10.05	0.91858	-0.138381	-0.605734	0.179583	-0.560852	-0.533805
ACH-001543	upper_aerodigestive	upper_aerodigestive_squamous	KOSC-2 cl3-43	0.918759	#N/A	#N/A	#N/A	#N/A	#N/A
ACH-000469	central_nervous_system	glioma	YH-13	0.918968	-0.610657	-0.0437031	0.128851	-0.715006	-0.469024
ACH-000604	blood	CML	KYO-1	0.918999	-0.0710755	-0.00394904	0.0395534	-0.179422	-0.366191
ACH-001346	upper_aerodigestive	upper_aerodigestive_squamous	H103	0.919404	-0.349131	-0.0226568	0.0513771	-0.627176	-0.330607
ACH-000001	ovary	ovary_adenocarcinoma	NIH:OVCAR-3	0.919489	#N/A	#N/A	#N/A	#N/A	#N/A
ACH-001398	kidney	renal_cell_carcinoma	SW 156	0.919775	#N/A	#N/A	#N/A	#N/A	#N/A
ACH-000816	lung	SCLC	NCI-H524	0.919931	#N/A	#N/A	#N/A	#N/A	#N/A
ACH-000485	gastric	gastric_adenocarcinoma	GSU	0.91999	-0.722438	0.066393	-0.1962	-0.425252	-0.322825
ACH-000311	lung	NSCLC	NCI-H2122	0.920069	-0.573138	-0.638425	-0.0756922	-0.579322	-0.390401
ACH-000998	colorectal	colorectal_adenocarcinoma	CW-2	0.920293	#N/A	#N/A	#N/A	#N/A	#N/A
ACH-000363	plasma_cell	multiple_myeloma	SK-MM-2	0.920398	-0.142107	0.22157	0.0625497	-0.22106	-0.413078
ACH-001413	urinary_tract	bladder_carcinoma	UM-UC-11	0.920532	-0.233106	-0.382353	-0.11345	-0.448029	-0.338006
ACH-001861	bile_duct	gallbladder_adenocarcinoma	TGBC1TKB	0.920604	#N/A	#N/A	#N/A	#N/A	#N/A
ACH-001669	blood	ALL	TANOUE	0.920937	#N/A	#N/A	#N/A	#N/A	#N/A
ACH-000067	central_nervous_system	glioma	Hs 683	0.921912	-0.539545	-0.648319	0.139024	-0.390104	-0.39592
ACH-000938	blood	ALL	NALM-6	0.922246	-0.383121	0.174309	-0.030262	-0.400739	-0.304869
ACH-000048	ovary	ovary_adenocarcinoma	TOV-112D	0.922569	-0.09105	-0.015928	-0.0546076	-0.40451	-0.492388
ACH-001719	ovary	ovary_adenocarcinoma	OCI-C4p	0.923024	#N/A	#N/A	#N/A	#N/A	#N/A
ACH-000803	lung	SCLC	COLO 668	0.923432	#N/A	#N/A	#N/A	#N/A	#N/A
ACH-000885	ovary	ovary_adenocarcinoma	TOV-21G	0.923601	-0.559615	-0.551536	0.0402162	-0.520536	-0.413839
ACH-000758	gastric	gastric_adenocarcinoma	MKN74	0.923828	-0.542715	-0.0456075	0.0196626	-0.696527	-0.356952
ACH-000847	gastric	gastric_adenocarcinoma	HGC-27	0.92426	-0.307114	0.0168844	-0.129368	-0.510799	-0.562044
ACH-000350	colorectal	colorectal_adenocarcinoma	COLO-678	0.924306	-0.783628	-0.498316	0.106058	-0.130682	-0.303393
ACH-000896	urinary_tract	bladder_carcinoma	647-V	0.924518	-0.388494	-0.212527	-0.0131904	-0.409454	-0.472998
ACH-000452	esophagus	esophagus_squamous	TE-8	0.924554	-0.162871	-0.0498906	0.040706	-0.532185	-0.479185
ACH-001368	esophagus	esophagus_adenocarcinoma	OAC-M5.1	0.925061	-0.193042	0.216803	0.0771852	-0.514313	-0.425212
ACH-000010	lung	NSCLC	NCI-H2077	0.925141	#N/A	#N/A	#N/A	#N/A	#N/A
ACH-000479	central_nervous_system	glioma	KNS-81	0.925418	#N/A	#N/A	#N/A	#N/A	#N/A
ACH-000078	peripheral_nervous_system	neuroblastoma	MHH-NB-11	0.926039	-0.154035	-0.441433	-0.0261044	-0.366321	-0.32238
ACH-000576	plasma_cell	multiple_myeloma	KMS-27	0.926089	-0.0974972	0.093939	-0.0902548	-0.170034	-0.466566
ACH-001839	bile_duct	cholangiocarcinoma	ICC13-7	0.926414	#N/A	#N/A	#N/A	#N/A	#N/A
ACH-001616	lymphocyte	non_hodgkin_lymphoma	OCI-LY18	0.926546	#N/A	#N/A	#N/A	#N/A	#N/A
ACH-000424	bone	Ewing_sarcoma	TC-71	0.926676	0.0578811	-0.140749	-0.0384351	-0.232948	-0.0977441
ACH-001349	central_nervous_system	medulloblastoma	HD-MB03	0.926827	#N/A	#N/A	#N/A	#N/A	#N/A
ACH-001020	soft_tissue	ATRT	BT-16	0.927127	#N/A	-0.284276	-0.433088	-0.729885	-0.582052
ACH-001375	pancreas	exocrine	PACADD-119	0.927248	-0.318482	-0.325615	-0.291185	-0.259813	-0.38286
ACH-000674	gastric	gastric_adenocarcinoma	NUGC-4	0.927348	#N/A	#N/A	#N/A	#N/A	#N/A
ACH-001411	urinary_tract	bladder_carcinoma	UM-UC-5	0.927541	-0.386937	-0.315205	0.187428	-0.668371	-0.753803
ACH-000666	lung	NSCLC	NCI-H1355	0.928004	#N/A	#N/A	#N/A	#N/A	#N/A
ACH-000893	lung	NSCLC	NCI-H1651	0.929098	#N/A	#N/A	#N/A	#N/A	#N/A
ACH-000362	blood	AML	MOLM-13	0.929506	-0.0780137	-0.181445	-0.0622488	-0.600054	-0.130196
ACH-000235	pancreas	exocrine	Panc 04.03	0.92956	-0.548391	-0.571347	-0.0553037	-0.520211	-0.491175
ACH-000005	blood	AML	HEL 92.1.7	0.929736	-0.26876	-0.283288	0.143905	-0.638218	-0.345012
ACH-000215	central_nervous_system	glioma	LN382	0.929918	-0.29773	-0.342695	0.0365873	-0.616324	-0.585805
ACH-000719	ovary	ovary_adenocarcinoma	RMG-I	0.930189	#N/A	#N/A	#N/A	#N/A	#N/A
ACH-000408	esophagus	esophagus_squamous	TE-5	0.930661	-0.506343	-0.354053	0.0938769	-0.818238	-0.682945
ACH-000504	central_nervous_system	glioma	SNB75	0.931166	-0.389726	0.211729	-0.00861071	-0.304371	-0.228774
ACH-001414	urinary_tract	bladder_carcinoma	UM-UC-6	0.931491	-0.58211	-0.879668	0.183156	-0.594295	-0.598366
ACH-000197	blood	ALL	TALL-1	0.931599	#N/A	#N/A	#N/A	#N/A	#N/A
ACH-001128	soft_tissue	malignant_rhabdoid_tumor	MON	0.931634	#N/A	#N/A	#N/A	#N/A	#N/A
ACH-001129	blood	AML	MONO-MAC-1	0.931848	-0.308119	-0.0502231	-0.00299564	-0.333231	-0.398381
ACH-001001	bone	osteosarcoma	143B	0.932033	-0.102553	-0.116883	0.139572	-0.503907	-0.378924
ACH-000808	bile_duct	cholangiocarcinoma	HuH28	0.932175	#N/A	#N/A	#N/A	#N/A	#N/A
ACH-000430	ovary	ovary_adenocarcinoma	TYK-nu	0.932211	#N/A	#N/A	#N/A	#N/A	#N/A
ACH-000219	skin	melanoma	A-375	0.932424	-0.205801	-0.67486	0.0290378	-0.769852	-0.701142
ACH-000827	skin	melanoma	WM-793	0.933086	-0.212552	-0.0267113	0.0179954	-0.497598	-0.385943
ACH-001205	bone	Ewing_sarcoma	TC-32	0.933176	-0.473765	-0.181005	-0.277088	-0.644563	-0.419522
ACH-001333	cervix	cervical_carcinoma	C-33 A	0.933528	-0.53535	-0.0895009	0.163523	-0.355433	-0.420521
ACH-001329	central_nervous_system	glioma	ANGM-CSS	0.933841	-0.383072	-0.20252	-0.0647941	-0.537076	-0.336506
ACH-000331	mesothelioma	mesothelioma	IST-MES2	0.933861	-0.516931	-0.636229	0.152415	-0.31174	-0.444139
ACH-000209	bile_duct	cholangiocarcinoma	SNU-1079	0.934185	-0.415928	-0.580801	0.0116589	-0.364195	-0.699586
ACH-000988	uterus	endometrial_adenocarcinoma	MFE-319	0.934392	-0.732603	-0.347353	-0.142377	-0.45682	-0.429509
ACH-000982	colorectal	colorectal_adenocarcinoma	GP2d	0.93462	#N/A	#N/A	#N/A	#N/A	#N/A
ACH-001059	soft_tissue	malignant_rhabdoid_tumor	DL	0.934703	#N/A	#N/A	#N/A	#N/A	#N/A
ACH-001145	ovary	ovary_adenocarcinoma	OC 316	0.935909	-0.430559	-0.400341	0.000462594	-0.415229	-0.455852
ACH-000398	lymphocyte	non_hodgkin_lymphoma	RI-1	0.93609	#N/A	#N/A	#N/A	#N/A	#N/A
ACH-000183	plasma_cell	multiple_myeloma	L-363	0.936266	-0.275592	-0.0714273	-0.0508123	-0.405014	-0.279656
ACH-000499	bone	Ewing_sarcoma	EW8	0.936399	-0.307099	-0.0798246	-0.284607	-0.333931	-0.341947
ACH-001341	cervix	cervical_adenocarcinoma	DoTc2 4510	0.936439	-0.152641	0.14044	0.0960807	-0.41883	-0.374803
ACH-000107	pancreas	exocrine	Capan-2	0.93648	#N/A	#N/A	#N/A	#N/A	#N/A
ACH-000492	blood	ALL	MUTZ-5	0.936517	#N/A	#N/A	#N/A	#N/A	#N/A
ACH-000965	uterus	endometrial_adenosquamous	RL95-2	0.936914	-1.02499	-0.530319	0.00496752	-0.793426	-0.586944
ACH-002038	ovary	krukenberg_tumor	HSKTC	0.937386	#N/A	#N/A	#N/A	#N/A	#N/A
ACH-000288	breast	breast_ductal_carcinoma	BT-549	0.937502	-0.364891	0.10258	0.0722837	-0.303017	-0.487649
ACH-001196	soft_tissue	rhabdomyosarcoma	SMSCTR	0.937769	-0.164074	0.0157277	-0.0802483	-0.548498	-0.612074
ACH-000239	gastric	gastric_adenocarcinoma	HuG1-N	0.938273	#N/A	#N/A	#N/A	#N/A	#N/A
ACH-000261	lung	NSCLC	RERF-LC-AI	0.938855	-0.755621	-0.403587	0.100286	-0.315388	-0.413483
ACH-000800	lung	SCLC	NCI-H446	0.938984	0.0992683	-0.0641024	-0.0845818	-0.314452	-0.150478
ACH-001111	lymphocyte	lymphoma_unspecified	L82	0.938997	#N/A	#N/A	#N/A	#N/A	#N/A
ACH-000532	colorectal	colorectal_adenocarcinoma	SNU-61	0.939003	#N/A	#N/A	#N/A	#N/A	#N/A
ACH-001677	lymphocyte	lymphoma_unspecified	U-2904	0.939216	-0.0575772	-0.35252	0.22103	-0.377345	-0.402278
ACH-001532	kidney	malignant_rhabdoid_tumor	JMU-RTK-2	0.939226	-0.128652	-0.0561986	0.0420103	-0.483463	-0.375905
ACH-000735	upper_aerodigestive	upper_aerodigestive_squamous	PE/CA-PJ49	0.939299	-0.122213	-0.668177	-0.0500982	-0.690738	-0.45794
ACH-001442	cervix	cervical_squamous	A388	0.939387	0.15737	0.0753515	0.0983051	-0.452864	-0.306926
ACH-000551	blood	CML	K562	0.939754	-0.225337	0.107982	-0.101242	-0.544705	-0.331355
ACH-000004	blood	AML	HEL	0.93978	-0.130231	-0.040009	-0.00567584	-0.249578	-0.395529
ACH-001551	skin	merkel_cell_carcinoma	MCC14/2	0.93983	-0.598305	-0.210455	-0.200105	-0.468614	-0.451752
ACH-001650	cervix	cervical_adenocarcinoma	SISO	0.939849	-0.665023	-0.290539	-0.0116493	-0.491806	-0.623748
ACH-000809	esophagus	esophagus_squamous	KYSE-410	0.939914	-0.370467	-0.434046	0.0973936	-0.593632	-0.500543
ACH-000962	ovary	ovary_adenocarcinoma	OC 314	0.940218	#N/A	#N/A	#N/A	#N/A	#N/A
ACH-000252	colorectal	colorectal_adenocarcinoma	LS1034	0.940286	#N/A	#N/A	#N/A	#N/A	#N/A
ACH-000852	lung	NSCLC	NCI-H1435	0.94044	#N/A	#N/A	#N/A	#N/A	#N/A
ACH-000867	lung	NSCLC	ChaGo-K-1	0.940665	-0.15279	0.0572558	0.050856	-0.382099	-0.390856
ACH-001855	bile_duct	cholangiocarcinoma	OZ	0.940699	#N/A	#N/A	#N/A	#N/A	#N/A
ACH-001649	prostate	prostate_adenocarcinoma	Shmac 5	0.940723	#N/A	#N/A	#N/A	#N/A	#N/A
ACH-000189	kidney	renal_cell_carcinoma	RCC10RGB	0.940826	-0.194414	-0.578883	-0.727615	-0.462505	0.0153613
ACH-000495	kidney	renal_cell_carcinoma	TUHR4TKB	0.940891	-0.193861	-0.151327	0.0912009	-0.213247	-0.241278
ACH-000782	blood	ALL	SEM	0.940932	-0.131206	-0.142776	-0.109446	-0.35589	-0.309869
ACH-000549	upper_aerodigestive	upper_aerodigestive_squamous	SNU-1076	0.941065	-0.635724	-0.287979	-0.0532608	-0.539542	-0.111593
ACH-000489	colorectal	colorectal_adenocarcinoma	SW1116	0.941139	#N/A	#N/A	#N/A	#N/A	#N/A
ACH-002048	soft_tissue	rhabdomyosarcoma	RMS-YM	0.941181	#N/A	#N/A	#N/A	#N/A	#N/A
ACH-000756	central_nervous_system	glioma	GI-1	0.941224	-0.0631677	-0.0546437	-0.224015	-0.674573	-0.446292
ACH-000366	peripheral_nervous_system	neuroblastoma	SK-N-DZ	0.941269	-0.0773754	-0.0766075	-0.0385902	-0.499752	-0.498067
ACH-000605	esophagus	esophagus_squamous	TE-6	0.94144	-0.0908561	-0.0221083	0.120289	-0.449205	-0.705098
ACH-000985	colorectal	colorectal_adenocarcinoma	LS411N	0.941493	#N/A	#N/A	#N/A	#N/A	#N/A
ACH-000527	ovary	ovary_adenocarcinoma	OVISE	0.941713	-0.196753	-0.348894	-0.0560223	-0.450418	-0.53087
ACH-001530	uterus	choriocarcinoma	JEG-3	0.942105	-1.001	-0.0969112	-0.303197	-0.593314	-0.498777
ACH-000784	esophagus	esophagus_squamous	KYSE-70	0.942132	-0.160872	-0.0823963	-0.0947306	-0.350269	-0.323185
ACH-000341	peripheral_nervous_system	neuroblastoma	SK-N-FI	0.942238	-0.107576	-0.223618	-0.163306	-0.315967	-0.489897
ACH-000190	lymphocyte	hodgkin_lymphoma	HD-MY-Z	0.942356	#N/A	-0.124854	-0.199446	-0.575512	-0.139791
ACH-000940	uterus	endometrial_adenocarcinoma	AN3 CA	0.942795	#N/A	#N/A	#N/A	#N/A	#N/A
ACH-000094	pancreas	exocrine	HPAF-II	0.943058	#N/A	#N/A	#N/A	#N/A	#N/A
ACH-000688	ovary	ovary_adenocarcinoma	OV7	0.94311	-0.342893	-1.21188	-0.0473538	-0.507001	-0.571636
ACH-000019	breast	breast_carcinoma	MCF7	0.943245	-0.377467	-0.113633	-0.361512	-0.328426	-0.115696
ACH-001347	upper_aerodigestive	upper_aerodigestive_squamous	H157	0.943345	#N/A	#N/A	#N/A	#N/A	#N/A
ACH-000373	blood	AML	SKM-1	0.943505	#N/A	#N/A	#N/A	#N/A	#N/A
ACH-000516	bone	chondrosarcoma	CAL-78	0.943631	-0.580225	-0.270427	-0.0479612	-0.502136	-0.370234
ACH-000036	central_nervous_system	glioma	U343	0.943703	-0.130031	-0.575893	-0.0202635	-0.537087	-0.362303
ACH-000023	pancreas	exocrine	PA-TU-8988T	0.943937	#N/A	#N/A	#N/A	#N/A	#N/A
ACH-002016	eye	uveal_melanoma	Mel290	0.94409	-0.548985	-0.906064	-0.061138	-0.420028	-0.48128
ACH-001844	bile_duct	cholangiocarcinoma	ICC4	0.94415	#N/A	#N/A	#N/A	#N/A	#N/A
ACH-000706	lung	NSCLC	EKVX	0.944373	-0.367797	-0.298798	0.00302309	-0.425638	-0.504355
ACH-001524	skin	skin_squamous	HSC-5	0.944614	-0.511621	-0.295422	-0.0320228	-0.926419	-0.272532
ACH-000979	prostate	prostate_adenocarcinoma	DU 145	0.944727	#N/A	#N/A	#N/A	#N/A	#N/A
ACH-000260	peripheral_nervous_system	neuroblastoma	SK-N-AS	0.944818	-0.192262	-0.0896182	-0.0465526	-0.434029	-0.297439
ACH-000703	lung	SCLC	DMS 79	0.945837	#N/A	#N/A	#N/A	#N/A	#N/A
ACH-001495	uterus	uterine_carcinosarcoma	EMTOKA	0.945859	0.217726	0.178402	-0.104135	-0.445322	-0.65311
ACH-001552	skin	merkel_cell_carcinoma	MCC26	0.946227	-1.01724	-0.321856	0.0719341	-0.419812	-0.413334
ACH-000233	lymphocyte	non_hodgkin_lymphoma	DEL	0.946348	-0.550022	-0.0738154	-0.225295	-0.538364	-0.390366
ACH-000450	skin	melanoma	MEL-HO	0.946501	-0.354728	-0.720097	0.0503127	-0.368245	-0.534614
ACH-000626	plasma_cell	multiple_myeloma	U266B1	0.94652	#N/A	#N/A	#N/A	#N/A	#N/A
ACH-000368	central_nervous_system	glioma	SNU-1105	0.947296	-0.51614	-0.535762	0.178101	-0.353699	-0.415918
ACH-000697	lymphocyte	non_hodgkin_lymphoma	A3/KAW	0.948016	-0.479056	-0.187261	-0.107366	-0.555986	-0.488583
ACH-000047	gastric	gastric_adenocarcinoma	GCIY	0.948301	-0.2428	-0.267127	-0.201057	-0.620403	-0.591035
ACH-000117	breast	breast_adenocarcinoma	EFM-192A	0.948701	#N/A	#N/A	#N/A	#N/A	#N/A
ACH-000909	uterus	endometrial_adenocarcinoma	JHUEM-2	0.948914	#N/A	#N/A	#N/A	#N/A	#N/A
ACH-000636	blood	ALL	RPMI-8402	0.948922	#N/A	#N/A	#N/A	#N/A	#N/A
ACH-000619	upper_aerodigestive	upper_aerodigestive_squamous	PE/CA-PJ15	0.949016	-0.370229	-0.537662	0.218683	-0.603764	-0.430174
ACH-000013	ovary	ovary_adenocarcinoma	ONCO-DG-1	0.949047	-0.198185	-0.132594	0.00924722	-0.454646	-0.205291
ACH-000676	central_nervous_system	glioma	LN-464	0.949049	0.0629704	-0.201136	-0.000229777	-0.16276	-0.465319
ACH-000937	blood	ALL	PF-382	0.949561	-0.0881494	0.13064	-0.149774	-0.571855	-0.501509
ACH-000665	lung	NSCLC	SK-MES-1	0.949932	0.0625368	0.0535589	-0.103812	-0.360159	-0.287349
ACH-000039	bone	Ewing_sarcoma	SK-N-MC	0.950025	0.0551078	-0.0273489	-0.162171	-0.200773	-0.260921
ACH-000139	pancreas	exocrine	Panc 03.27	0.950086	#N/A	#N/A	#N/A	#N/A	#N/A
ACH-000749	lung	SCLC	DMS 273	0.95036	#N/A	#N/A	#N/A	#N/A	#N/A
ACH-000223	breast	breast_ductal_carcinoma	HCC1937	0.950572	-0.239393	-0.0904631	0.151542	-0.741069	-0.702603
ACH-000877	lymphocyte	non_hodgkin_lymphoma	EB1	0.950659	#N/A	#N/A	#N/A	#N/A	#N/A
ACH-000958	colorectal	colorectal_adenocarcinoma	SW48	0.950836	-0.573483	-0.0511573	0.149754	-0.324391	-0.50339
ACH-001960	bile_duct	cholangiocarcinoma	CC-SW-1	0.95091	-0.138528	0.083282	-0.00047513	-0.508495	-0.33723
ACH-000257	lung	SCLC	COR-L279	0.951135	-0.0757836	-0.562174	0.0147765	-0.551536	-0.252032
ACH-000848	liver	hepatocellular_carcinoma	JHH-7	0.951274	-0.208605	0.101866	0.151648	-0.294527	-0.443028
ACH-000390	lung	NSCLC	LUDLU-1	0.95128	-0.0188773	-0.050497	0.0692437	-0.576733	-0.347217
ACH-000176	lung	NSCLC	LOU-NH91	0.951411	#N/A	#N/A	#N/A	#N/A	#N/A
ACH-000750	skin	melanoma	LOX IMVI	0.951515	#N/A	#N/A	#N/A	#N/A	#N/A
ACH-000542	ovary	ovary_adenocarcinoma	Hey-A8	0.951538	-0.125189	-0.253918	-0.0471588	-0.426453	-0.569126
ACH-000664	lymphocyte	non_hodgkin_lymphoma	SU-DHL-1	0.951541	#N/A	#N/A	#N/A	#N/A	#N/A
ACH-000628	lung	NSCLC	NCI-H596	0.951637	#N/A	#N/A	#N/A	#N/A	#N/A
ACH-000482	lung	NSCLC	RERF-LC-KJ	0.951673	#N/A	#N/A	#N/A	#N/A	#N/A
ACH-000701	ovary	ovary_adenocarcinoma	RMUG-S	0.951831	-0.522077	-0.746927	-0.0314934	-0.770794	-0.559536
ACH-000812	skin	melanoma	COLO-783	0.951909	#N/A	#N/A	#N/A	#N/A	#N/A
ACH-000671	liver	hepatoblastoma	HuH-6	0.952055	-0.617264	0.0651314	0.144614	-0.261438	-0.17912
ACH-001991	ovary	ovary_adenocarcinoma	NZOV9	0.95217	#N/A	#N/A	#N/A	#N/A	#N/A
ACH-000623	central_nervous_system	glioma	SNU-201	0.952179	-0.306114	0.138467	-0.1318	-0.367157	-0.433393
ACH-000622	central_nervous_system	glioma	KNS-42	0.952232	-0.0734053	-0.272226	0.0569623	-0.262703	-0.222189
ACH-000505	soft_tissue	leiomyosarcoma	RKN	0.952752	-0.475687	-0.162797	-0.181267	-0.358776	-0.430651
ACH-001449	lymphocyte	non_hodgkin_lymphoma	BL-2	0.953018	#N/A	#N/A	#N/A	#N/A	#N/A
ACH-001458	colorectal	colorectal_adenocarcinoma	C75	0.953107	-0.308042	-0.176757	-0.157094	-0.287494	-0.543204
ACH-000910	breast	breast_carcinoma	MDA-MB-453	0.953108	-0.0664291	0.020034	0.103266	-0.463613	-0.384001
ACH-001698	upper_aerodigestive	upper_aerodigestive_squamous	UPCI-SCC-116	0.953741	#N/A	#N/A	#N/A	#N/A	#N/A
ACH-000432	blood	CML	BV-173	0.953758	#N/A	#N/A	#N/A	#N/A	#N/A
ACH-000059	blood	ALL	SUP-B15	0.954893	#N/A	#N/A	#N/A	#N/A	#N/A
ACH-001438	embryo	embryo_carcinoma	1777N Rpmet	0.955048	#N/A	#N/A	#N/A	#N/A	#N/A
ACH-000780	lung	SCLC	NCI-H1105	0.955054	#N/A	#N/A	#N/A	#N/A	#N/A
ACH-000993	uterus	endometrial_adenocarcinoma	JHUEM-7	0.955166	-0.229528	-0.184194	-0.0922301	-0.435811	-0.411545
ACH-001642	lymphocyte	non_hodgkin_lymphoma	SCC-3	0.955243	#N/A	#N/A	#N/A	#N/A	#N/A
ACH-000025	central_nervous_system	meningioma	CH-157MN	0.955385	-0.198427	-0.615181	0.132123	-0.456599	-0.428005
ACH-001526	bone	osteosarcoma	HuO9	0.955435	-0.0921495	-0.316054	-0.0778282	-0.56542	-0.419395
ACH-000669	lung	NSCLC	SW 900	0.955647	#N/A	#N/A	#N/A	#N/A	#N/A
ACH-000991	colorectal	colorectal_adenocarcinoma	SNU-81	0.956007	#N/A	#N/A	#N/A	#N/A	#N/A
ACH-000026	urinary_tract	bladder_carcinoma	253J-BV	0.956057	#N/A	#N/A	#N/A	#N/A	#N/A
ACH-000142	urinary_tract	bladder_carcinoma	CAL-29	0.956289	-0.577907	-0.106473	-0.205724	-1.00812	-0.582062
ACH-001452	blood	hairy_cell_leukemia	BONNA-12	0.957225	#N/A	#N/A	#N/A	#N/A	#N/A
ACH-000488	esophagus	esophagus_squamous	TE-11	0.957529	-0.110674	-0.251131	0.0680884	-0.603935	-0.421825
ACH-000202	colorectal	colorectal_adenocarcinoma	COLO-320	0.957541	-0.152171	0.13955	0.235526	-0.356962	-0.360853
ACH-000791	lung	NSCLC	RERF-LC-Ad1	0.957896	-0.0234423	-0.546922	0.0118143	-0.390982	-0.234638
ACH-000351	gastric	gastric_adenocarcinoma	MKN1	0.958633	#N/A	#N/A	#N/A	#N/A	#N/A
ACH-000919	gastric	gastric_adenocarcinoma	IM95	0.958892	#N/A	#N/A	#N/A	#N/A	#N/A
ACH-001678	lymphocyte	non_hodgkin_lymphoma	U-2940	0.958961	#N/A	#N/A	#N/A	#N/A	#N/A
ACH-000101	blood	ALL	KE-37	0.959348	#N/A	#N/A	#N/A	#N/A	#N/A
ACH-000348	skin	melanoma	RPMI-7951	0.959399	-0.309021	-0.261894	0.124729	-0.507574	-0.297308
ACH-000396	urinary_tract	bladder_carcinoma	J82	0.959846	#N/A	#N/A	#N/A	#N/A	#N/A
ACH-000884	skin	melanoma	MDA-MB-435S	0.959916	-0.075034	-0.007915	0.157786	-0.346076	-0.380752
ACH-000996	uterus	endometrial_adenocarcinoma	HEC-251	0.959939	-0.385231	-0.0761083	0.0482573	-0.639443	-0.404575
ACH-000831	uterus	endometrial_adenocarcinoma	HEC-50B	0.960041	-0.166064	-0.143844	-0.056667	-0.492641	-0.32131
ACH-000925	lung	NSCLC	DV-90	0.9606	#N/A	#N/A	#N/A	#N/A	#N/A
ACH-000147	breast	breast_ductal_carcinoma	T-47D	0.960705	#N/A	#N/A	#N/A	#N/A	#N/A
ACH-000734	liver	hepatocellular_carcinoma	JHH-5	0.960935	-0.434771	-0.131981	-0.176861	-0.563851	-0.369598
ACH-000159	kidney	renal_cell_carcinoma	OS-RC-2	0.961353	-0.106252	0.0897346	-0.0856372	-0.35755	-0.5574
ACH-001106	blood	ALL	KOPN-8	0.961705	#N/A	#N/A	#N/A	#N/A	#N/A
ACH-000269	central_nervous_system	glioma	AM-38	0.961768	#N/A	#N/A	#N/A	#N/A	#N/A
ACH-000804	peripheral_nervous_system	neuroblastoma	NB-1	0.961956	-0.416826	-0.313991	-0.213289	-0.274702	-0.364034
ACH-002046	uterus	MMMT	HTMMT	0.962175	#N/A	#N/A	#N/A	#N/A	#N/A
ACH-000936	ovary	ovary_adenocarcinoma	EFO-27	0.962292	-0.254718	-0.68397	-0.182578	-0.391842	-0.314694
ACH-001751	soft_tissue	rhabdomyosarcoma	Rh36	0.962362	#N/A	#N/A	#N/A	#N/A	#N/A
ACH-000811	ovary	ovary_adenocarcinoma	SK-OV-3	0.962785	-0.188959	-0.117818	-0.120665	-0.430893	-0.410495
ACH-000533	soft_tissue	malignant_rhabdoid_tumor	NCI-H2004 RT	0.963058	-0.244883	-0.183108	-0.149173	-0.406959	-0.297534
ACH-000228	upper_aerodigestive	upper_aerodigestive_squamous	BICR 31	0.963385	-0.878159	0.217322	0.0904164	-0.316037	-0.361259
ACH-000182	bile_duct	cholangiocarcinoma	SNU-869	0.963429	-0.272268	0.142648	0.196682	-0.569828	-0.283596
ACH-000336	blood	AML	OCI-AML3	0.963462	-0.05678	-0.152602	0.25666	-0.438756	-0.264937
ACH-001651	uterus	endometrial_squamous	SKG-I	0.963836	-0.157641	0.319057	-0.181541	-0.444653	-0.62163
ACH-000873	esophagus	esophagus_squamous	KYSE-270	0.964007	-0.0105492	-0.367019	0.0410083	-0.693189	-0.604682
ACH-000285	lymphocyte	non_hodgkin_lymphoma	Toledo	0.964088	#N/A	#N/A	#N/A	#N/A	#N/A
ACH-000966	ovary	ovary_adenocarcinoma	IGROV1	0.964433	#N/A	#N/A	#N/A	#N/A	#N/A
ACH-000942	blood	ALL	HPB-ALL	0.964509	#N/A	#N/A	#N/A	#N/A	#N/A
ACH-000964	blood	ALL	MOLT-3	0.964718	#N/A	#N/A	#N/A	#N/A	#N/A
ACH-000693	esophagus	esophagus_squamous	KYSE-180	0.964774	-0.0763081	0.0584014	0.0303483	-0.316245	-0.286321
ACH-000752	lung	SCLC	NCI-H196	0.964956	#N/A	#N/A	#N/A	#N/A	#N/A
ACH-000178	pancreas	exocrine	Hs 766T	0.96532	-0.33147	0.156669	0.0146753	-0.523675	-0.369185
ACH-002023	colorectal	colorectal_adenocarcinoma	TGBC18TKB	0.965651	#N/A	#N/A	#N/A	#N/A	#N/A
ACH-000521	lung	NSCLC	NCI-H2030	0.966354	-0.511072	-0.785379	-0.00481704	-0.417267	-0.468545
ACH-000810	skin	melanoma	SK-MEL-30	0.966476	-0.527434	-0.258331	0.7806	-0.424538	-0.384092
ACH-000560	gastric	gastric_small_cell	ECC10	0.966762	#N/A	#N/A	#N/A	#N/A	#N/A
ACH-000595	central_nervous_system	glioma	LN-229	0.9668	#N/A	#N/A	#N/A	#N/A	#N/A
ACH-000198	blood	AML	EOL-1	0.966924	-0.267039	-0.159239	0.0274628	-0.460374	-0.386654
ACH-000736	gastric	gastric_adenocarcinoma	SNU-601	0.967162	-0.700435	0.00191329	-0.0166381	-0.388328	-0.345533
ACH-000913	uterus	endometrial_stromal_sarcoma	ESS-1	0.967361	-0.384667	-0.221118	0.0315186	-0.519747	-0.333468
ACH-001652	uterus	endometrial_squamous	SKG-II	0.968167	-0.66915	-0.658131	0.0759915	-0.432217	-0.644745
ACH-000713	ovary	ovary_adenocarcinoma	Caov-3	0.96825	-0.51954	-0.285285	-0.22592	-0.5374	-0.202623
ACH-002041	thyroid	thyroid_carcinoma	HOTHC	0.968552	#N/A	#N/A	#N/A	#N/A	#N/A
ACH-000899	skin	melanoma	WM-88	0.968847	-0.206175	0.00275093	-0.0466344	-0.341549	-0.531755
ACH-000268	bile_duct	cholangiocarcinoma	SNU-245	0.968875	#N/A	#N/A	#N/A	#N/A	#N/A
ACH-000613	bone	osteosarcoma	HOS	0.969008	#N/A	#N/A	#N/A	#N/A	#N/A
ACH-001679	lymphocyte	lymphoma_unspecified	U-2973	0.969014	#N/A	#N/A	#N/A	#N/A	#N/A
ACH-000627	lung	NSCLC	LCLC-103H	0.969112	-0.400705	-0.124589	-0.00701637	-0.978128	-0.480298
ACH-000423	skin	melanoma	SK-MEL-3	0.969851	#N/A	#N/A	#N/A	#N/A	#N/A
ACH-000419	plasma_cell	multiple_myeloma	KMS-28BM	0.970032	#N/A	#N/A	#N/A	#N/A	#N/A
ACH-001740	soft_tissue	rhabdomyosarcoma	Rh28	0.970152	-0.161352	0.0867384	0.0260867	-0.545694	-0.0542412
ACH-000468	pancreas	exocrine	PK-45H	0.970189	-0.190218	-0.179222	-0.257856	-0.473479	-0.732098
ACH-000968	skin	melanoma	COLO 792	0.970221	-0.335106	-0.310174	-0.0577642	-0.194229	-0.40113
ACH-000632	skin	melanoma	Hs 944.T	0.970548	-0.0709787	-0.351963	-0.0826285	-0.368003	-0.364698
ACH-000343	lung	NSCLC	NCI-H522	0.970891	-0.535285	0.021165	-0.279755	-0.549916	-0.487918
ACH-000507	gastric	gastric_adenocarcinoma	KE-39	0.971516	-0.867128	-0.370651	-0.0483669	-0.569591	-0.273786
ACH-000090	prostate	prostate_adenocarcinoma	PC-3	0.971619	#N/A	#N/A	#N/A	#N/A	#N/A
ACH-001512	ovary	ovary_adenocarcinoma	HAC-2	0.971914	#N/A	#N/A	#N/A	#N/A	#N/A
ACH-000155	pancreas	exocrine	SW 1990	0.971948	#N/A	#N/A	#N/A	#N/A	#N/A
ACH-000480	liver	hepatocellular_carcinoma	HuH-7	0.972142	-0.464013	-0.0206939	-0.146464	-0.295206	-0.309682
ACH-000901	lung	NSCLC	HCC-1359	0.972336	-0.122819	0.519037	-0.022722	-0.40398	-0.366468
ACH-001852	bile_duct	cholangiocarcinoma	HKGZ-CC	0.972682	-0.282788	-0.428335	0.0430172	-0.596815	-0.254843
ACH-000694	esophagus	esophagus_squamous	TE-9	0.972702	-0.0925327	-0.149571	0.00291515	-0.468527	-0.467964
ACH-000258	breast	breast_carcinoma	DU4475	0.973129	0.0261102	0.0965413	0.303241	-0.324845	-0.560196
ACH-000124	lymphocyte	non_hodgkin_lymphoma	OCI-LY-19	0.973209	#N/A	#N/A	#N/A	#N/A	#N/A
ACH-000819	central_nervous_system	glioma	LN-18	0.973628	-0.340964	-0.155931	-0.085983	-0.530143	-0.30142
ACH-000463	lung	NSCLC	NCI-H460	0.973812	-0.195922	-0.0908478	-0.197154	-0.449731	-0.420969
ACH-000518	upper_aerodigestive	upper_aerodigestive_squamous	CAL-33	0.973934	-0.320349	-0.251697	0.0507834	-0.781026	-0.535018
ACH-000846	upper_aerodigestive	upper_aerodigestive_squamous	FaDu	0.974266	0.016093	0.0348302	0.271314	-0.33395	-0.280069
ACH-000922	blood	ALL	RCH-ACV	0.974313	#N/A	#N/A	#N/A	#N/A	#N/A
ACH-000898	gastric	gastric_adenocarcinoma	SNU-719	0.974444	-0.283105	0.0813564	-0.288643	-0.332075	-0.377042
ACH-000677	lung	NSCLC	SW 1573	0.974708	-0.926004	-0.024775	-0.0944613	-0.283407	-0.499731
ACH-000074	blood	CML	KU812	0.975035	-0.415505	-0.0609978	-0.0452631	-0.361076	-0.362802
ACH-000164	pancreas	exocrine	PANC-1	0.975179	-0.057752	0.10822	0.0295534	-0.342148	-0.548548
ACH-000399	lung	SCLC	NCI-H2196	0.975393	#N/A	#N/A	#N/A	#N/A	#N/A
ACH-000206	lymphocyte	ATL	C8166	0.975647	-0.0841834	-0.159787	0.0841233	-0.385702	-0.347126
ACH-001451	cervix	cervical_squamous	BOKU	0.975722	-0.817316	-0.285088	0.0214487	-0.18167	-0.420268
ACH-001300	peripheral_nervous_system	neuroblastoma	CHLA15	0.975942	-0.210078	-0.648048	-0.248216	-0.634505	-0.401412
ACH-000971	colorectal	colorectal_adenocarcinoma	HCT 116	0.976276	#N/A	#N/A	#N/A	#N/A	#N/A
ACH-000943	colorectal	colorectal_adenocarcinoma	RKO	0.97635	-0.379786	-0.290322	-0.014245	-0.46258	-0.356109
ACH-001518	uterus	endometrial_adenocarcinoma	HEC-116	0.976374	#N/A	#N/A	#N/A	#N/A	#N/A
ACH-000760	central_nervous_system	glioma	LNZ308	0.976448	-0.138968	-0.654778	-0.0875237	-0.280777	-0.472056
ACH-000535	pancreas	exocrine	BxPC-3	0.976624	0.0343283	-0.0513279	0.0299016	-0.628177	-0.211342
ACH-000658	plasma_cell	multiple_myeloma	KMS-18	0.976692	-0.0486891	0.166476	0.119683	-0.377889	-0.598902
ACH-001038	bone	Ewing_sarcoma	COGE352	0.976799	0.0278822	0.175285	0.00726648	-0.483686	-0.365485
ACH-000461	bile_duct	cholangiocarcinoma	SNU-1196	0.977014	-0.27064	-0.285764	-0.0192752	-0.314225	-0.496408
ACH-000404	skin	melanoma	K029AX	0.977239	-0.20413	-0.604589	0.313732	-0.474143	-0.505056
ACH-000021	lung	NSCLC	NCI-H1693	0.97733	-1.24339	-0.193525	-0.0101785	-0.902643	-0.41853
ACH-001563	skin	melanoma	MM127	0.977481	0.00288005	-0.989571	0.0918902	-0.298173	-0.431628
ACH-000274	skin	melanoma	Hs 852.T	0.978345	-0.0938393	-0.963561	0.0515098	-0.541358	-0.452347
ACH-001799	soft_tissue	liposarcoma	LPS141	0.978416	-0.274686	0.109374	-0.16828	-0.587746	-0.448848
ACH-000470	colorectal	colorectal_adenocarcinoma	SW1463	0.978523	-0.340255	-0.518331	0.102688	-0.34946	-0.494712
ACH-000835	soft_tissue	pleomorphic_sarcoma	GCT	0.978889	-0.445579	-0.647854	-0.0915627	-0.483616	-0.487719
ACH-000961	uterus	endometrial_adenocarcinoma	Ishikawa (Heraklio) 02 ER-	0.978934	-0.358335	-0.196211	-0.252334	-0.611967	-0.55853
ACH-000570	central_nervous_system	glioma	YKG1	0.979354	-0.25522	-0.732665	0.0326869	-0.329843	-0.575657
ACH-000137	central_nervous_system	glioma	8-MG-BA	0.979573	-0.168973	-0.172217	-0.213508	-0.587147	-0.30396
ACH-000714	plasma_cell	multiple_myeloma	KMS-11	0.979672	-0.167186	0.083513	0.129829	-0.586875	-0.40964
ACH-000030	lung	NSCLC	PC-14	0.980249	-0.175434	-0.77867	-0.0513374	-0.84768	-0.553467
ACH-000503	upper_aerodigestive	upper_aerodigestive_squamous	BICR 16	0.980477	-0.188666	0.0551054	-0.187997	-0.529132	-0.613914
ACH-000921	lung	SCLC	NCI-H1339	0.980764	-0.351881	-0.00308912	0.0549903	-0.40348	-0.255325
ACH-000955	colorectal	colorectal_adenocarcinoma	SNU-407	0.980852	#N/A	#N/A	#N/A	#N/A	#N/A
ACH-000305	esophagus	esophagus_squamous	EC-GI-10	0.981292	-0.170846	-0.105545	0.120309	-0.376835	-0.285424
ACH-000441	skin	melanoma	SH-4	0.981364	#N/A	#N/A	#N/A	#N/A	#N/A
ACH-000994	uterus	endometrial_adenocarcinoma	HEC-59	0.981725	-0.0853724	-0.306627	0.0458368	-0.687706	-0.489624
ACH-000277	breast	breast_ductal_carcinoma	HCC1419	0.981952	-0.251107	0.168558	0.0638086	-0.269325	-0.368399
ACH-000378	lung	NSCLC	NCI-H647	0.98218	-0.162665	-0.241975	-0.130366	-0.393884	-0.108636
ACH-000855	esophagus	esophagus_squamous	KYSE-150	0.982192	0.00644154	-0.0298511	0.0776661	-0.0512799	-0.355972
ACH-000099	peripheral_nervous_system	neuroblastoma	SIMA	0.982336	-0.113605	-0.403351	-6.05413e-05	-0.388571	-0.263736
ACH-000639	lung	SCLC	NCI-H211	0.982472	-0.171409	0.0229904	-0.0427937	-0.432768	-0.354884
ACH-001401	adrenal_cortex	adrenal_carcinoma	SW-13	0.982651	#N/A	#N/A	#N/A	#N/A	#N/A
ACH-000302	uterus	mullerian_carcinoma	SNU-1077	0.983434	-0.332458	-0.0591935	-0.228404	-0.602442	-0.43879
ACH-000120	peripheral_nervous_system	neuroblastoma	CHP-212	0.98378	-0.200048	-0.358867	-0.062984	-0.179574	-0.297239
ACH-000592	central_nervous_system	glioma	TM-31	0.983846	-0.261035	-0.411531	-0.347554	-0.444241	-0.339553
ACH-001857	bile_duct	cholangiocarcinoma	SG231	0.984155	-0.180847	0.0582032	0.395683	-0.427342	-0.17688
ACH-000188	upper_aerodigestive	upper_aerodigestive_squamous	SCC-25	0.984229	-0.627915	-0.16877	0.0980414	-0.482896	-0.302298
ACH-000347	pancreas	endocrine	QGP-1	0.9845	#N/A	#N/A	#N/A	#N/A	#N/A
ACH-000815	lymphocyte	hodgkin_lymphoma	KM-H2	0.984741	#N/A	#N/A	#N/A	#N/A	#N/A
ACH-000376	central_nervous_system	glioma	SF-295	0.985292	-0.2748	-0.610774	0.0282725	-0.26516	-0.382449
ACH-000100	soft_tissue	rhabdomyosarcoma	RH-41	0.985302	#N/A	#N/A	#N/A	#N/A	#N/A
ACH-000924	lung	NSCLC	NCI-H2172	0.985365	-0.397384	-0.830146	-0.0133041	-0.398164	-0.351135
ACH-000171	kidney	renal_cell_carcinoma	VMRC-RCZ	0.985382	#N/A	#N/A	#N/A	#N/A	#N/A
ACH-000721	breast	breast_carcinoma	HMC-1-8	0.985406	-0.0662651	0.128831	0.0111152	-0.422636	-0.410417
ACH-000046	kidney	renal_cell_carcinoma	ACHN	0.985907	#N/A	#N/A	#N/A	#N/A	#N/A
ACH-000849	breast	breast_carcinoma	MDA-MB-468	0.986232	-0.315886	-0.0773733	0.146186	-0.821703	-0.518578
ACH-000322	skin	melanoma	HT-144	0.986583	-0.0292099	-0.139741	0.120021	-0.380202	-0.448567
ACH-000678	gastric	gastric_adenocarcinoma	MKN7	0.986742	#N/A	#N/A	#N/A	#N/A	#N/A
ACH-000648	mesothelioma	mesothelioma	NCI-H28	0.9873	-0.144207	-0.28867	0.120283	-0.178045	-0.502152
ACH-000768	breast	breast_carcinoma	MDA-MB-231	0.987762	-0.451116	-0.238302	0.122956	-0.721794	-0.340223
ACH-000903	thyroid	thyroid_carcinoma	FTC-133	0.988595	-0.295793	-0.287185	0.14805	-0.454616	-0.489
ACH-000387	blood	AML	TF-1	0.988787	-0.010767	-0.015587	0.148187	-0.482148	-0.319352
ACH-000002	blood	AML	HL-60	0.988854	#N/A	#N/A	#N/A	#N/A	#N/A
ACH-000270	pancreas	exocrine	HPAC	0.988916	#N/A	#N/A	#N/A	#N/A	#N/A
ACH-001533	lymphocyte	non_hodgkin_lymphoma	KARPAS 1718	0.989004	#N/A	#N/A	#N/A	#N/A	#N/A
ACH-000022	pancreas	exocrine	PA-TU-8988S	0.989413	-0.433575	0.0356094	-0.162048	-0.301893	-0.303982
ACH-000824	esophagus	esophagus_squamous	KYSE-510	0.989467	-0.634246	-0.0408722	-0.255113	-0.65477	-0.412706
ACH-000391	bone	Ewing_sarcoma	MHH-ES-1	0.989471	-0.390266	0.000674555	0.0542729	-0.245636	-0.48895
ACH-000502	pancreas	exocrine	TCC-PAN2	0.989534	-0.154009	-0.42636	0.0627078	-0.756155	-0.323335
ACH-000775	lung	lung_carcinoid	NCI-H727	0.989728	-0.0391199	-0.0502342	0.0444747	-0.338275	-0.353028
ACH-001500	esophagus	esophagus_adenocarcinoma	FLO-1	0.989767	#N/A	-0.143845	-0.0770065	-0.477291	-0.481439
ACH-000983	blood	CML	KCL-22	0.989829	-0.0367885	-0.0292493	0.0313212	-0.412675	-0.622096
ACH-000886	lung	NSCLC	NCI-H2009	0.99005	-0.0460827	0.0639105	0.0783186	-0.365873	-0.404412
ACH-000657	ovary	ovary_adenocarcinoma	A2780	0.990058	-0.423113	-0.254102	-0.0674322	-0.635928	-0.407662
ACH-000192	uterus	endometrial_adenocarcinoma	MFE-280	0.990074	#N/A	#N/A	#N/A	#N/A	#N/A
ACH-000464	central_nervous_system	glioma	CAS-1	0.990283	-0.0853	-0.154976	-0.0823546	-0.567473	-0.603735
ACH-000374	breast	breast_ductal_carcinoma	HCC1143	0.990491	-0.336957	0.20998	0.0169042	-0.69206	-0.32091
ACH-000415	upper_aerodigestive	upper_aerodigestive_squamous	BICR 6	0.990537	-0.571332	-0.152929	0.088492	-0.462832	-0.12873
ACH-000403	colorectal	colorectal_adenocarcinoma	NCI-H747	0.990851	-1.12874	-0.756103	0.00896134	-0.476722	-0.490256
ACH-000458	skin	melanoma	CJM	0.991121	-0.317868	-0.531013	-0.335679	-0.53719	-0.416742
ACH-000319	mesothelioma	mesothelioma	MPP 89	0.99131	-0.539164	-0.0600301	-0.177186	-0.732765	-0.412186
ACH-001184	soft_tissue	rhabdomyosarcoma	SCMC-RM2	0.991485	0.111559	0.164434	0.00872806	-0.144848	-0.0875597
ACH-000012	lung	NSCLC	HCC827	0.991553	0.0129125	-0.170408	-0.0951914	-0.368451	-0.0943743
ACH-000035	lung	NSCLC	NCI-H1650	0.991905	-0.205793	-0.139321	0.0721566	-0.971436	-0.352389
ACH-000565	colorectal	colorectal_adenocarcinoma	RCM-1	0.991914	#N/A	#N/A	#N/A	#N/A	#N/A
ACH-001391	breast	breast_carcinoma	SUM-159PT	0.992017	-0.380819	-0.0138604	0.0860585	-0.614377	-0.403535
ACH-000108	pancreas	exocrine	KP-3	0.992163	-0.371705	-0.701511	-0.27014	-0.449769	-0.581039
ACH-000324	ovary	ovary_adenocarcinoma	JHOC-5	0.992325	-0.0920324	-0.26677	-0.0156928	-0.491476	-0.469181
ACH-000805	skin	melanoma	COLO-679	0.992377	-0.156577	0.126322	-0.133967	-0.513897	-0.480547
ACH-000947	ovary	ovary_adenocarcinoma	OVK18	0.992717	-0.153319	0.0624717	-0.00630233	-0.372541	-0.371767
ACH-000471	liver	NA	Li-7	0.992728	-0.568272	-0.147205	-0.250459	-0.508374	-0.588169
ACH-001192	bone	Ewing_sarcoma	SK-NEP-1	0.992836	-0.240237	0.150108	-0.0428068	-0.309525	-0.40529
ACH-000294	blood	AML	NB-4	0.992965	-0.257646	0.0550914	0.0141879	-0.286739	-0.140003
ACH-000769	lung	NSCLC	LK-2	0.993061	-0.132469	-0.322104	0.0442368	-0.501592	-0.361558
ACH-000243	pancreas	exocrine	DAN-G	0.993313	-0.0127022	-0.0809218	-0.0871521	-0.446898	-0.316385
ACH-000777	esophagus	esophagus_squamous	KYSE-30	0.993823	-0.0913683	-0.608982	-0.314602	-0.803937	-0.396163
ACH-000839	urinary_tract	bladder_carcinoma	SCaBER	0.993898	-1.11564	-0.532938	0.135927	-0.828586	-0.494258
ACH-000589	lung	NSCLC	NCI-H1437	0.994705	-0.459203	-0.319905	-0.100812	-0.35744	-0.264092
ACH-000210	bone	Ewing_sarcoma	CADO-ES1	0.994747	#N/A	#N/A	#N/A	#N/A	#N/A
ACH-000783	breast	breast_carcinoma	CAMA-1	0.994946	-0.544888	0.129333	-0.0598315	-0.430764	-0.420567
ACH-001377	pancreas	exocrine	PACADD-137	0.994957	-0.357697	-0.00909576	-0.19349	-0.57111	-0.266175
ACH-000696	ovary	ovary_adenocarcinoma	OVCAR-8	0.995097	-0.709337	-0.375859	-0.0605549	-0.548283	-0.5822
ACH-000723	upper_aerodigestive	upper_aerodigestive_squamous	YD-10B	0.995125	#N/A	#N/A	#N/A	#N/A	#N/A
ACH-000609	central_nervous_system	glioma	SF126	0.995396	#N/A	#N/A	#N/A	#N/A	#N/A
ACH-000015	lung	NSCLC	NCI-H1581	0.995466	-0.485246	-0.235869	-0.194956	-0.446453	-0.330279
ACH-001670	peripheral_nervous_system	PNET	TASK1	0.995503	#N/A	#N/A	#N/A	#N/A	#N/A
ACH-000762	upper_aerodigestive	upper_aerodigestive_squamous	YD-38	0.995515	-0.495163	0.106084	-0.153426	-1.4043	-0.33232
ACH-000481	lung	NSCLC	NCI-H2170	0.995581	-0.133575	-0.0371696	-0.0657004	-0.446845	-0.470181
ACH-000939	soft_tissue	leiomyosarcoma	SK-UT-1	0.9956	#N/A	-0.0905602	-0.253829	-0.325816	-0.317616
ACH-000763	plasma_cell	multiple_myeloma	MM1-S	0.995626	0.0979422	0.0132627	0.121979	-0.305053	-0.228705
ACH-000425	skin	melanoma	UACC-62	0.99581	-0.0893472	0.273879	-0.0409134	-0.372766	-0.323967
ACH-001200	soft_tissue	malignant_rhabdoid_tumor	STM91-01	0.995916	#N/A	#N/A	#N/A	#N/A	#N/A
ACH-000027	central_nervous_system	glioma	GOS-3	0.995997	#N/A	#N/A	#N/A	#N/A	#N/A
ACH-000813	lung	NSCLC	T3M-10	0.996024	#N/A	#N/A	#N/A	#N/A	#N/A
ACH-000739	liver	hepatocellular_carcinoma	Hep G2	0.996068	-0.122	0.218722	-0.169369	-0.295363	-0.319767
ACH-000679	esophagus	esophagus_squamous	OE19	0.996192	#N/A	#N/A	#N/A	#N/A	#N/A
ACH-000952	prostate	prostate_adenocarcinoma	MDA PCa 2b	0.996218	#N/A	#N/A	#N/A	#N/A	#N/A
ACH-000837	lung	NSCLC	NCI-H322	0.996349	-0.151736	-0.328242	0.0252676	-0.390143	-0.321835
ACH-000278	ovary	ovary_adenocarcinoma	COV362	0.996369	0.0305008	0.0207858	-0.107009	-0.213597	-0.365312
ACH-000273	central_nervous_system	glioma	SF539	0.996376	-0.477704	-0.166396	0.0301333	-0.518135	-0.557422
ACH-000916	lung	NSCLC	NCI-H1573	0.996404	-0.267261	-0.408555	-0.0325038	-0.620834	-0.916628
ACH-001864	bile_duct	cholangiocarcinoma	YSCCC	0.996448	-0.124747	-0.119979	0.0720147	-0.539942	-0.337695
ACH-000927	breast	breast_ductal_carcinoma	BT-474	0.996477	#N/A	#N/A	#N/A	#N/A	#N/A
ACH-000715	upper_aerodigestive	upper_aerodigestive_squamous	SNU-1214	0.996555	#N/A	#N/A	#N/A	#N/A	#N/A
ACH-002025	colorectal	colorectal_adenocarcinoma	TT1TKB	0.996672	#N/A	#N/A	#N/A	#N/A	#N/A
ACH-000473	urinary_tract	bladder_carcinoma	RT-112	0.996937	-0.260785	-0.294396	-0.100581	-0.601431	-0.0823536
ACH-000250	kidney	renal_cell_carcinoma	KMRC-20	0.996959	-0.0543103	-0.338685	-0.0259813	-0.541589	-0.568968
ACH-000443	ovary	ovary_adenocarcinoma	OVKATE	0.997026	#N/A	#N/A	#N/A	#N/A	#N/A
ACH-000484	kidney	renal_cell_carcinoma	VMRC-RCW	0.997164	-0.233146	-0.328831	0.104262	-0.219521	-0.363169
ACH-000959	colorectal	colorectal_adenocarcinoma	SNU-C4	0.997231	-0.578228	-0.0298804	0.247308	-0.230096	-0.40077
ACH-000037	#N/A	#N/A	#N/A	0.997279	-0.104545	0.491773	-0.168231	-0.302939	-0.456914
ACH-000232	central_nervous_system	glioma	U-251 MG	0.997367	-0.173065	-0.848649	-0.138733	-0.581889	-0.442396
ACH-000221	liver	hepatocellular_carcinoma	SNU-398	0.99741	-0.229551	-0.00212799	0.0643918	-0.354656	-0.289723
ACH-000397	uterus	clear_cell_carcinoma	TEN	0.997449	-0.608297	-0.637036	-0.119884	-0.3396	-0.284851
ACH-000204	plasma_cell	multiple_myeloma	LP-1	0.997516	-0.212675	0.380644	0.210702	-0.732053	-0.156471
ACH-000007	colorectal	colorectal_adenocarcinoma	LS513	0.997557	-0.71279	-0.247477	0.0777778	-0.635733	-0.300512
ACH-000651	colorectal	colorectal_adenocarcinoma	SW620	0.997584	-0.302073	-0.0510109	0.0485129	-0.268298	-0.174382
ACH-000615	skin	melanoma	SK-MEL-28	0.997676	#N/A	#N/A	#N/A	#N/A	#N/A
ACH-000599	pancreas	exocrine	PA-TU-8902	0.99768	-0.110778	0.0124001	0.162628	-0.534093	-0.596697
ACH-000510	lung	NSCLC	NCI-H1299	0.997721	-0.136364	-0.150548	0.0120805	-0.447894	-0.519203
ACH-000018	urinary_tract	bladder_carcinoma	T24	0.997784	-0.478211	-0.712179	-0.247077	-0.561171	-0.528624
ACH-000265	pancreas	exocrine	KP4	0.997925	-0.17055	-0.0592477	-0.156297	-0.338506	-0.201886
ACH-000990	uterus	endometrial_adenocarcinoma	HEC-108	0.998201	#N/A	#N/A	#N/A	#N/A	#N/A
ACH-000945	lung	NSCLC	NCI-H650	0.998356	#N/A	#N/A	#N/A	#N/A	#N/A
ACH-000571	central_nervous_system	glioma	T98G	0.998357	-0.43597	-0.550982	-0.10467	-0.427619	-0.444404
ACH-000900	lung	NSCLC	NCI-H23	0.998381	-0.0946384	-0.107917	-0.108365	-0.540928	-0.384957
ACH-000716	thyroid	thyroid_carcinoma	TT2609-C02	0.998414	#N/A	#N/A	#N/A	#N/A	#N/A
ACH-000650	skin	melanoma	IGR-37	0.998564	#N/A	#N/A	#N/A	#N/A	#N/A
ACH-000434	lung	NSCLC	NCI-H1915	0.998651	-0.0230447	-0.400346	0.0863039	-0.37512	-0.366024
ACH-000132	ovary	ovary_adenocarcinoma	JHOS-2	0.998739	-1.23594	0.224324	0.0290135	-0.484091	-0.703374
ACH-000087	bone	Ewing_sarcoma	SK-ES-1	0.998798	-0.343811	-0.0454561	-0.0769953	-0.41942	-0.683709
ACH-000858	lung	NSCLC	KNS-62	0.998877	-0.0774803	0.000349448	0.0288453	-0.338732	-0.359416
ACH-000795	blood	ALL	MOLT-13	0.999027	#N/A	#N/A	#N/A	#N/A	#N/A
ACH-000957	colorectal	colorectal_adenocarcinoma	LS 180	0.999044	-0.452267	-0.173027	0.0937997	-0.429714	-0.502975
ACH-000699	breast	breast_ductal_carcinoma	HCC1395	0.999066	-0.15955	-0.0825376	0.103047	-0.331259	-0.463421
ACH-000123	ovary	ovary_adenocarcinoma	COV434	0.999092	-0.21595	-0.233036	0.0546873	-0.673375	-0.457775
ACH-000860	lung	NSCLC	NCI-H358	0.999232	#N/A	#N/A	#N/A	#N/A	#N/A
ACH-001293	central_nervous_system	glioma	CHLA-200	0.999293	#N/A	#N/A	#N/A	#N/A	#N/A
ACH-000720	urinary_tract	bladder_carcinoma	TCCSUP	0.999568	-0.247582	-0.00696361	-0.00188662	-0.409516	-0.310953
ACH-000429	kidney	renal_cell_carcinoma	A-704	0.999668	#N/A	#N/A	#N/A	#N/A	#N/A
ACH-000726	esophagus	esophagus_squamous	TE-14	1	#N/A	#N/A	#N/A	#N/A	#N/A
ACH-000687	lymphocyte	non_hodgkin_lymphoma	CI-1	1	#N/A	#N/A	#N/A	#N/A	#N/A
ACH-001193	bone	Ewing_sarcoma	SK-PN-DW	1	-0.398496	-0.391088	0.109487	-0.478782	-0.303049
ACH-000296	colorectal	colorectal_adenocarcinoma	OUMS-23	1	-0.500789	-0.281402	-0.0568263	-0.703592	-0.404177
ACH-001283	bone	Ewing_sarcoma	TC-106	1	-0.119677	-0.00724981	0.0873905	-0.415934	-0.276378
ACH-000579	skin	melanoma	UACC-257	1	-0.0243467	-0.0685116	0.302436	-0.455517	-0.606468
ACH-000357	lymphocyte	non_hodgkin_lymphoma	JeKo-1	1	#N/A	#N/A	#N/A	#N/A	#N/A
ACH-001024	skin	melanoma	CHL-1	1	#N/A	#N/A	#N/A	#N/A	#N/A
ACH-000601	pancreas	exocrine	MIA PaCa-2	1	-0.241701	0.0173391	-0.0969186	-0.343016	-0.346421
ACH-000890	lung	SCLC	SW 1271	1	-0.572049	-0.406539	0.0645211	-0.312865	-0.457786
ACH-000977	prostate	prostate_adenocarcinoma	LNCaP clone FGC	1	#N/A	#N/A	#N/A	#N/A	#N/A
ACH-000670	lung	SCLC	SBC-5	1	#N/A	#N/A	#N/A	#N/A	#N/A
ACH-000841	lung	NSCLC	NCI-H2087	1	-0.180001	-0.316543	0.192034	-0.399388	-0.217321
ACH-000661	skin	melanoma	WM1799	1	-0.21122	-0.448915	-0.19388	-0.671877	-0.400984
ACH-000790	lung	SCLC	SHP-77	1	-0.213576	-0.127822	0.00919677	-0.43026	-0.164271
ACH-000381	colorectal	colorectal_adenocarcinoma	T84	1	-0.34669	0.0109921	-0.0893881	-0.439371	-0.491016
ACH-001516	cervix	cervical_carcinoma	HCSC-1	1	#N/A	#N/A	#N/A	#N/A	#N/A
ACH-001853	bile_duct	cholangiocarcinoma	KMCH-1	1	-0.634971	0.0523193	-0.165142	-0.194562	-0.587213
ACH-000472	upper_aerodigestive	upper_aerodigestive_squamous	HSC-2	1	-0.467595	-0.386536	0.00827492	-0.571605	-0.38389
ACH-001016	central_nervous_system	glioma	Becker	1	#N/A	#N/A	#N/A	#N/A	#N/A
ACH-001521	skin	skin_squamous	HKA-1	1	-0.37764	0.094034	0.0739004	-0.566549	-0.539245
ACH-000149	peripheral_nervous_system	neuroblastoma	SK-N-SH	1	#N/A	#N/A	#N/A	#N/A	#N/A
ACH-000662	lung	NSCLC	COR-L23	1	-0.106959	0.0234199	0.180269	-0.60448	-0.610747
ACH-001148	lymphocyte	lymphoma_unspecified	OCILY132	1	#N/A	#N/A	#N/A	#N/A	#N/A
ACH-000652	pancreas	exocrine	SUIT-2	1	-0.234264	-0.311859	-0.0322125	-0.708538	-0.489433
ACH-000649	kidney	renal_cell_carcinoma	786-O	1	-0.106527	-0.312899	0.132335	-0.339713	-0.373416
ACH-000555	kidney	renal_cell_carcinoma	A-498	1	#N/A	#N/A	#N/A	#N/A	#N/A
ACH-000323	central_nervous_system	glioma	42-MG-BA	1	-0.341259	-0.498181	-0.0851454	-0.410701	-0.175355
ACH-001190	skin	melanoma	SK-MEL-2	1	-0.010535	-0.398869	0.076148	-0.492155	-0.341402
ACH-000645	mesothelioma	mesothelioma	JL-1	1	-0.433216	-0.171718	-0.0445328	-0.368905	-0.481892
ACH-001164	#N/A	#N/A	#N/A	1	-0.0144125	-0.0318504	0.134807	-0.518584	-0.0799192
ACH-000477	skin	melanoma	Malme-3M	1	-0.134686	-0.0177585	0.0682021	-0.293279	-0.71906
ACH-000259	peripheral_nervous_system	neuroblastoma	KELLY	1	-0.223039	-0.19173	-0.128385	-0.354693	-0.382374
ACH-000359	bone	osteosarcoma	MG-63	1	#N/A	#N/A	#N/A	#N/A	#N/A
ACH-000917	esophagus	esophagus_squamous	TE-4	1	-0.294164	0.0010116	-0.116142	-0.511196	-0.260885
ACH-000508	lung	SCLC	COR-L88	1	#N/A	#N/A	#N/A	#N/A	#N/A
ACH-001301	peripheral_nervous_system	neuroblastoma	COG-N-278	1	-0.124454	-0.033489	-0.180224	-0.514556	-0.408109
ACH-000525	lung	SCLC	NCI-H2171	1	#N/A	#N/A	#N/A	#N/A	#N/A
ACH-000950	colorectal	colorectal_adenocarcinoma	LoVo	1	-0.655356	-0.376258	-0.180761	-0.387322	-0.307592
ACH-000315	lymphocyte	non_hodgkin_lymphoma	KARPAS-422	1	-0.370737	-0.171833	-0.0638019	-0.281888	-0.355794
ACH-000766	lung	NSCLC	NCI-H1648	1	-0.171175	-0.487396	-0.133514	-0.525748	-0.422007
ACH-001664	gastric	gastric_adenocarcinoma	SNU-638	1	-0.204714	-0.292467	0.0502363	-0.404267	-0.392666
ACH-000227	peripheral_nervous_system	neuroblastoma	KP-N-YN	1	-0.0588773	-0.517432	0.0299037	-0.63961	-0.610756
ACH-001289	soft_tissue	ATRT	COG-AR-359	1	-0.326425	-0.0868528	-0.121002	-0.583342	-0.455227
ACH-000011	urinary_tract	bladder_carcinoma	253J	1	-0.114051	-0.504668	0.00206614	-0.503427	-0.482648
ACH-000426	plasma_cell	multiple_myeloma	KMS-20	1	-0.194156	-0.0144135	0.05682	-0.301419	-0.175403
ACH-000444	lung	NSCLC	LU99	1	-0.342716	-0.188565	0.100834	-0.5319	-0.394055
ACH-000822	skin	melanoma	SK-MEL-24	1	0.00760271	-0.547328	-0.121	-0.424728	-0.265281
ACH-000356	gastric	gastric_adenocarcinoma	MKN-45	1	-0.132027	-0.111777	0.0398344	-0.656883	-0.0673737
ACH-000427	gastric	gastric_adenocarcinoma	NCI-N87	1	-0.570644	-0.0851785	-0.206581	-0.747353	-0.26605
ACH-000785	lung	NSCLC	NCI-H2126	1	-0.394182	-0.577797	-0.0898992	-0.573876	-0.423755
ACH-000878	lung	NSCLC	HCC-15	1	-0.32876	-0.261617	-0.246682	-0.568137	-0.579656
ACH-000572	skin	melanoma	G-361	1	#N/A	#N/A	#N/A	#N/A	#N/A
ACH-000870	lung	SCLC	NCI-H1930	1	#N/A	#N/A	#N/A	#N/A	#N/A
ACH-000759	breast	breast_ductal_carcinoma	MDA-MB-175-VII	1	#N/A	#N/A	#N/A	#N/A	#N/A
ACH-001711	central_nervous_system	PNET	PFSK-1	1	#N/A	#N/A	#N/A	#N/A	#N/A
ACH-001412	urinary_tract	bladder_carcinoma	UM-UC-10	1	-0.139675	0.0342197	-0.0638095	-0.859502	-0.323065
ACH-000653	plasma_cell	multiple_myeloma	JJN-3	1	-0.0117841	0.0687195	0.167919	-0.219517	-0.3834
ACH-000417	pancreas	exocrine	Panc 08.13	1	#N/A	#N/A	#N/A	#N/A	#N/A
ACH-000377	bile_duct	cholangiocarcinoma	SNU-478	NA	-0.727657	-0.0853642	-0.00562572	-0.579576	-0.35836
ACH-000918	blood	ALL	MOLT-16	NA	#N/A	#N/A	#N/A	#N/A	#N/A
ACH-000656	lymphocyte	non_hodgkin_lymphoma	SU-DHL-8	NA	#N/A	#N/A	#N/A	#N/A	#N/A
ACH-001502	embryo	teratoma	GCT-27	NA	#N/A	#N/A	#N/A	#N/A	#N/A
ACH-001028	soft_tissue	ATRT	CHLA-06-ATRT	NA	0.0331292	0.303723	0.0801827	-0.414761	-0.368454
ACH-000061	lymphocyte	non_hodgkin_lymphoma	HH	NA	#N/A	#N/A	#N/A	#N/A	#N/A
ACH-000747	lung	NSCLC	NCI-H1703	NA	-0.211528	0.0926936	-0.0539365	-0.421808	-0.533805
ACH-001693	upper_aerodigestive	upper_aerodigestive_squamous	UPCI-SCC-072	NA	#N/A	#N/A	#N/A	#N/A	#N/A
ACH-001607	bile_duct	gallbladder_adenocarcinoma	NOZ	NA	-0.130075	-0.995033	-0.0908603	-0.46127	-0.528122
ACH-000865	esophagus	esophagus_squamous	KYSE-450	NA	-0.0208279	0.161949	-0.11274	-0.269154	-0.374454
ACH-000355	lung	SCLC	NCI-H82	NA	-0.399534	-0.0102817	0.228152	-0.450497	-0.313526
ACH-001402	cervix	cervical_squamous	SW756	NA	-0.405166	-0.192935	-0.198901	-0.581652	-0.439812
ACH-000541	plasma_cell	multiple_myeloma	KMS-34	NA	0.0634994	0.225905	-0.0749441	-0.133728	-0.509362
ACH-001336	cervix	cervical_squamous	Ca Ski	NA	-0.548505	-0.341672	0.214697	-0.647971	-0.217693
ACH-000008	#N/A	#N/A	#N/A	NA	#N/A	#N/A	#N/A	#N/A	#N/A
ACH-002010	eye	uveal_melanoma	MP41	NA	#N/A	#N/A	#N/A	#N/A	#N/A
ACH-000686	liver	hepatocellular_carcinoma	SNU-878	NA	#N/A	#N/A	#N/A	#N/A	#N/A
ACH-000070	blood	ALL	697	NA	-0.181069	0.123594	-0.110937	-0.576981	-0.369114
ACH-000151	blood	ALL	JM1	NA	-0.117128	-0.152019	0.496667	-0.148156	-0.268549
ACH-001050	soft_tissue	rhabdomyosarcoma	CW9019	NA	-0.619722	-0.343922	0.108354	-1.1273	-0.339325
ACH-000092	mesothelioma	mesothelioma	NCI-H2452	NA	-0.370684	-0.255239	-0.00783756	-0.365528	-0.389738
ACH-001703	lymphocyte	non_hodgkin_lymphoma	VAL	NA	#N/A	#N/A	#N/A	#N/A	#N/A
ACH-000338	lymphocyte	non_hodgkin_lymphoma	SR-786	NA	#N/A	#N/A	#N/A	#N/A	#N/A
ACH-001334	cervix	cervical_carcinoma	C-4 I	NA	#N/A	#N/A	#N/A	#N/A	#N/A
ACH-000169	soft_tissue	rhabdomyosarcoma	RD	NA	-0.23146	0.0314606	-0.121861	-0.574638	-0.324692
ACH-000264	lung	NSCLC	Calu-6	NA	-0.142027	0.236289	0.0831128	-0.395888	-0.41739
ACH-001668	embryo	teratoma	SUSA	NA	-0.635035	0.266577	0.125407	-0.381943	0.17787
ACH-001022	bone	Ewing_sarcoma	CBAGPN	NA	#N/A	#N/A	#N/A	#N/A	#N/A
ACH-001610	central_nervous_system	glioma	NP 5	NA	0.0493433	0.287198	0.0402361	-0.428943	-0.301472
ACH-001538	bile_duct	cholangiocarcinoma	KKU-213	NA	-0.238681	-0.48307	0.0235379	-0.557915	-0.424432
ACH-000879	uterus	endometrial_adenocarcinoma	MFE-296	NA	#N/A	#N/A	#N/A	#N/A	#N/A
ACH-000207	upper_aerodigestive	upper_aerodigestive_squamous	Detroit 562	NA	-0.459676	-0.0967812	-0.0336991	-0.930324	-0.723254
ACH-001961	bile_duct	gallbladder_adenocarcinoma	GB2	NA	#N/A	#N/A	#N/A	#N/A	#N/A
ACH-000393	liver	hepatocellular_carcinoma	HLF	NA	-0.391192	-0.427233	0.136765	-0.714335	-0.345823
ACH-001674	peripheral_nervous_system	neuroblastoma	TGW	NA	0.00578147	0.130199	0.0604251	-0.377322	-0.292427
ACH-000987	skin	melanoma	MeWo	NA	#N/A	#N/A	#N/A	#N/A	#N/A
ACH-000353	esophagus	esophagus_squamous	TE-15	NA	#N/A	#N/A	#N/A	#N/A	#N/A
ACH-000794	upper_aerodigestive	upper_aerodigestive_squamous	BICR 22	NA	-0.338052	-0.330795	0.0134535	-0.471328	-0.263785
ACH-000042	pancreas	exocrine	Panc 02.03	NA	-0.281786	-0.489572	-0.0907769	-0.387546	-0.175117
ACH-001517	uterus	endometrial_adenocarcinoma	HEC-1	NA	-0.36035	0.231623	-0.111743	-0.469496	-0.117241
ACH-001450	lymphocyte	non_hodgkin_lymphoma	BLUE-1	NA	-0.3221	-0.133984	0.0629242	-0.343877	-0.339416
ACH-000056	lymphocyte	non_hodgkin_lymphoma	DOHH-2	NA	#N/A	#N/A	#N/A	#N/A	#N/A
ACH-001360	cervix	cervical_squamous	MS751	NA	#N/A	#N/A	#N/A	#N/A	#N/A
ACH-000550	skin	melanoma	IGR-39	NA	-0.349253	-0.854532	-0.0494729	-0.34474	-0.615353
ACH-000041	bone	Ewing_sarcoma	RD-ES	NA	0.00174331	0.283216	0.0374257	-0.430032	-0.557007
ACH-000069	lymphocyte	hodgkin_lymphoma	Hs 611.T	NA	#N/A	#N/A	#N/A	#N/A	#N/A
ACH-000587	lung	NSCLC	NCI-H1975	NA	-0.179094	-0.130531	0.042673	-0.260011	-0.301247
ACH-001662	breast	breast_ductal_carcinoma	SNU-2372	NA	#N/A	#N/A	#N/A	#N/A	#N/A
ACH-000380	plasma_cell	multiple_myeloma	KMS-12-BM	NA	#N/A	#N/A	#N/A	#N/A	#N/A
ACH-001609	central_nervous_system	glioma	NP 3	NA	-0.22589	-0.125619	-0.0175908	-0.36065	-0.437071
ACH-000435	uterus	endometrial_adenocarcinoma	EFE-184	NA	0.0690284	-0.206521	-0.577273	-0.732988	-0.491083
ACH-000902	breast	breast_ductal_carcinoma	CAL-148	NA	#N/A	#N/A	#N/A	#N/A	#N/A
ACH-000608	ovary	ovary_adenocarcinoma	COV644	NA	-0.508461	-0.48344	0.0941137	-0.578171	-0.359413
ACH-000582	skin	melanoma	COLO 741	NA	#N/A	#N/A	#N/A	#N/A	#N/A
ACH-000765	skin	melanoma	WM983B	NA	-0.144104	-0.46926	0.106827	-0.4861	-0.247264
ACH-001574	blood	AML	MOLM-14	NA	-0.262442	-0.0533911	0.0247892	-0.503155	-0.314467
ACH-000395	lung	NSCLC	NCI-H520	NA	-0.610517	-0.59988	-0.394207	-0.43665	-0.533416
ACH-000934	breast	breast_carcinoma	MDA-MB-361	NA	#N/A	#N/A	#N/A	#N/A	#N/A
ACH-001841	bile_duct	cholangiocarcinoma	ICC15	NA	0.0647436	-0.0821827	-0.047552	-0.652699	-0.512192
ACH-000954	uterus	endometrial_adenocarcinoma	HEC-1-A	NA	#N/A	#N/A	#N/A	#N/A	#N/A
ACH-000309	lung	NSCLC	SK-LU-1	NA	#N/A	#N/A	#N/A	#N/A	#N/A
ACH-000161	lung	NSCLC	COR-L105	NA	-0.205876	-0.166181	0.0131495	-0.446211	-0.404922
ACH-000312	peripheral_nervous_system	neuroblastoma	SK-N-BE(2)	NA	-0.242559	-0.106707	0.0560551	-0.362778	-0.429467
ACH-000733	lung	NSCLC	NCI-H1838	NA	#N/A	#N/A	#N/A	#N/A	#N/A
ACH-000352	breast	breast_carcinoma	HCC1428	NA	-0.579245	0.0120379	-0.031087	-0.780557	-0.50906
ACH-000583	lymphocyte	non_hodgkin_lymphoma	MC116	NA	-0.142268	-0.311755	0.068108	-0.566381	-0.557787
ACH-000330	breast	breast_ductal_carcinoma	EFM-19	NA	0.153067	0.175007	0.205979	-0.0636789	-0.483311
ACH-000866	lung	SCLC	NCI-H1048	NA	-0.0674165	0.197942	-0.100176	-0.358068	-0.223545
ACH-000926	colorectal	colorectal_adenocarcinoma	HT55	NA	-0.561887	-0.308132	0.125105	-0.464293	-0.416746
ACH-001212	soft_tissue	malignant_rhabdoid_tumor	TTC-642	NA	-0.0818287	-0.173067	0.0362888	-0.362484	-0.294077
ACH-000597	soft_tissue	malignant_rhabdoid_tumor	TTC-709	NA	#N/A	#N/A	#N/A	#N/A	#N/A
ACH-000984	uterus	endometrial_adenocarcinoma	HEC-6	NA	-0.223252	0.0669093	0.114666	-0.594393	-0.398974
ACH-001345	colorectal	colorectal_adenocarcinoma	GP5d	NA	-0.491515	-0.304767	-0.171916	-0.525753	-0.350939
ACH-001029	bone	Ewing_sarcoma	CHLA-10	NA	#N/A	#N/A	#N/A	#N/A	#N/A
ACH-000717	esophagus	esophagus_squamous	COLO-680N	NA	#N/A	#N/A	#N/A	#N/A	#N/A
ACH-001856	bile_duct	cholangiocarcinoma	RBE	NA	-0.147436	-0.732136	-0.223542	-0.573515	-0.397705
ACH-000963	colorectal	colorectal_adenocarcinoma	CCK-81	NA	-0.272332	-0.475183	0.13571	-0.692853	-0.294282
ACH-000744	lung	NSCLC	NCI-H1623	NA	#N/A	#N/A	#N/A	#N/A	#N/A
ACH-001441	eye	uveal_melanoma	92-1	NA	#N/A	#N/A	#N/A	#N/A	#N/A
ACH-002039	pancreas	exocrine	PK-8	NA	#N/A	#N/A	#N/A	#N/A	#N/A
ACH-000814	skin	melanoma	Hs 939.T	NA	-0.03406	-0.377144	-0.101158	-0.476222	-0.601545
ACH-000672	lung	NSCLC	IA-LM	NA	#N/A	#N/A	#N/A	#N/A	#N/A
ACH-000891	lung	NSCLC	HCC-1438	NA	#N/A	#N/A	#N/A	#N/A	#N/A
ACH-000097	breast	breast_ductal_carcinoma	ZR-75-1	NA	-0.734988	-0.0327555	-0.025917	-0.405629	-0.448191
ACH-000295	blood	CML	EM-2	NA	-0.27014	-0.000726575	0.0184534	-0.489825	-0.591254
ACH-000681	lung	NSCLC	A549	NA	-0.220611	-0.536809	-0.158127	-0.460045	-0.585241
ACH-001307	thyroid	thyroid_carcinoma	8505C	NA	#N/A	#N/A	#N/A	#N/A	#N/A
ACH-000915	skin	melanoma	IPC-298	NA	-0.0645874	-0.485885	0.0733831	-0.348111	-0.355828
ACH-000222	pancreas	exocrine	AsPC-1	NA	-0.418587	-0.488007	-0.147567	-0.529208	-0.502658
ACH-000698	lung	SCLC	DMS 53	NA	-0.218978	0.188836	-0.177184	-0.315391	-0.407262
ACH-000320	pancreas	exocrine	PSN1	NA	-0.169683	-0.25726	0.0988522	-0.217188	-0.449643
ACH-000986	colorectal	colorectal_adenocarcinoma	HT115	NA	-0.693	-0.301747	0.173809	-0.426285	-0.562297
ACH-000561	esophagus	esophagus_squamous	T.T	NA	#N/A	#N/A	#N/A	#N/A	#N/A
ACH-000868	lung	NSCLC	HCC-1195	NA	#N/A	#N/A	#N/A	#N/A	#N/A
ACH-000369	blood	AML	MOLM-16	NA	#N/A	#N/A	#N/A	#N/A	#N/A
ACH-000859	breast	breast_ductal_carcinoma	HCC1954	NA	-0.477083	-0.425964	-0.175344	-0.491409	-0.540759
ACH-000685	pancreas	exocrine	L3.3	NA	-0.10207	-0.208268	-0.230136	-0.445185	-0.491471
ACH-000086	mesothelioma	mesothelioma	ACC-MESO-1	NA	-0.569416	-0.779539	-0.237049	-0.47771	-0.779297
ACH-002022	colorectal	colorectal_adenocarcinoma	PMF-ko14	NA	#N/A	#N/A	#N/A	#N/A	#N/A
ACH-001745	soft_tissue	rhabdomyosarcoma	RhJT	NA	0.0684556	0.0788024	-0.0143576	-0.271071	-0.417655
ACH-000573	breast	breast_carcinoma	MDA-MB-436	NA	0.0235067	-0.00200857	-0.0597928	-0.129166	-0.310062
ACH-000659	lung	SCLC	SCLC-21H	NA	#N/A	#N/A	#N/A	#N/A	#N/A
ACH-001113	lung	NSCLC	LC-1/sq-SF	NA	#N/A	#N/A	#N/A	#N/A	#N/A
ACH-000564	plasma_cell	multiple_myeloma	KHM-1B	NA	#N/A	#N/A	#N/A	#N/A	#N/A
ACH-001321	thyroid	thyroid_squamous	TT	NA	#N/A	#N/A	#N/A	#N/A	#N/A
ACH-000416	lung	NSCLC	NCI-H838	NA	-0.405019	-0.15831	-0.0300527	-0.412503	-0.356429
ACH-000948	gastric	gastric_adenocarcinoma	23132/87	NA	-0.486367	-0.112007	0.0567736	-0.425623	-0.363924
ACH-001550	skin	merkel_cell_carcinoma	MCC13	NA	#N/A	0.0775932	-0.0993512	-0.427191	-0.432483
ACH-001511	upper_aerodigestive	upper_aerodigestive_squamous	H413	NA	-0.579913	-0.0602447	0.083182	-1.06133	-0.384766
ACH-000882	skin	melanoma	IGR-1	NA	-0.240109	-0.457974	0.0696204	-0.311692	-0.249977
ACH-000098	central_nervous_system	glioma	GAMG	NA	-0.309463	-0.353093	-0.25247	-0.528094	-0.417031
ACH-001239	skin	melanoma	WM-266-4	NA	0.0393793	-0.185071	-0.0340855	-0.366605	-0.531156
ACH-001786	colorectal	colorectal_adenocarcinoma	SNU-1544	NA	-0.672631	0.00378097	0.256617	-0.127644	-0.476951
ACH-000978	uterus	endometrial_adenocarcinoma	EN	NA	-0.129069	-0.00960877	-0.445597	-0.338612	-0.208472
ACH-000625	liver	hepatocellular_carcinoma	HEP 3B2.1-7	NA	#N/A	#N/A	#N/A	#N/A	#N/A
ACH-000603	lung	NSCLC	BEN	NA	#N/A	#N/A	#N/A	#N/A	#N/A
ACH-000906	ovary	ovary_adenocarcinoma	ES-2	NA	-0.658898	-0.107932	0.0080485	-0.294772	-0.350733
ACH-001794	soft_tissue	liposarcoma	93T449	NA	-0.42694	-0.406848	-0.0709139	-0.486849	-0.24073
ACH-000421	colorectal	colorectal_adenocarcinoma	SW837	NA	-0.783684	-0.0140325	0.0735805	-0.382332	-0.477342
ACH-000562	lung	NSCLC	HCC-78	NA	#N/A	#N/A	#N/A	#N/A	#N/A
ACH-000842	colorectal	colorectal_adenocarcinoma	SW480	NA	#N/A	#N/A	#N/A	#N/A	#N/A
ACH-000072	blood	CML	MEG-01	NA	#N/A	#N/A	#N/A	#N/A	#N/A
ACH-000967	colorectal	colorectal_adenocarcinoma	SNU-C2A	NA	#N/A	#N/A	#N/A	#N/A	#N/A
ACH-000524	ovary	ovary_adenocarcinoma	KURAMOCHI	NA	-0.451694	0.142548	0.0215674	-0.494099	-0.443634
ACH-000414	lung	NSCLC	NCI-H1944	NA	-0.38173	-0.0678941	-0.133328	-0.385743	-0.449524
ACH-000598	plasma_cell	multiple_myeloma	KMS-21BM	NA	#N/A	#N/A	#N/A	#N/A	#N/A
ACH-000457	kidney	renal_cell_carcinoma	CAL-54	NA	#N/A	#N/A	#N/A	#N/A	#N/A
ACH-000552	colorectal	colorectal_adenocarcinoma	HT-29	NA	-0.595864	-0.269463	-0.221478	-0.41389	-0.516633
ACH-000141	bile_duct	gallbladder_adenocarcinoma	SNU-308	NA	-0.734885	-0.373188	0.156092	-0.660597	-0.401248
ACH-000168	blood	AML	NOMO-1	NA	-0.156035	-0.00158969	0.0592525	-0.260795	-0.439606
ACH-000276	breast	breast_ductal_carcinoma	HCC38	NA	-0.0465665	0.0467767	0.269518	-0.332401	-0.266241
ACH-001578	embryo	embryo_carcinoma	NCCIT	NA	#N/A	#N/A	#N/A	#N/A	#N/A
ACH-000332	pancreas	exocrine	YAPC	NA	-0.179699	-0.79977	-0.0716007	-0.498957	-0.564049
ACH-000895	colorectal	colorectal_adenocarcinoma	CL-34	NA	#N/A	#N/A	#N/A	#N/A	#N/A
ACH-000205	pancreas	exocrine	PK-59	NA	#N/A	#N/A	#N/A	#N/A	#N/A
ACH-001523	skin	skin_squamous	HSC-1	NA	-0.300454	-0.269309	0.019214	-0.475828	-0.335029
ACH-001370	ovary	ovary_adenocarcinoma	OCI-P5x	NA	#N/A	#N/A	#N/A	#N/A	#N/A
ACH-000771	upper_aerodigestive	upper_aerodigestive_squamous	BICR 56	NA	-0.590786	-0.358581	0.0230819	-0.928017	-0.267899
ACH-001850	bile_duct	gallbladder_adenocarcinoma	G415	NA	0.0939278	0.0923363	0.120094	-0.486581	-0.511281
