# Supplementary material for: Covalent disruptor of YAP-TEAD association suppresses defective Hippo signaling
Source: eLife. 2022 Oct 27;11:e78810. doi: 10.7554/eLife.78810 (PMC9728995; doi:10.7554/eLife.78810)
Supplement: Supplementary file 5. [file elife-78810-supp5.xlsx]

## Sheet: Correlation analysis
Gene	Pearson correlation coefficient	minus log q value	q value (FDR)
TEAD1	0.27788	5.6363	2.31045e-06		rank 1st
YAP1	0.270477	5.31692	4.82035e-06		rank 2nd
TP53BP2	0.224171	2.80428	0.00156937		rank 3rd
ACTR3	0.210324	2.19729	0.00634908
FOSL1	0.206674	2.15336	0.00702495
NQO1	0.205976	2.15336	0.00702495
JUN	0.203548	2.0995	0.00795245
AGL	0.193961	1.79144	0.0161646
ARPC4	0.191177	1.70255	0.0198359
PKN2	0.189583	1.70135	0.0198909
VCL	0.187326	1.63014	0.0234346
ALG6	0.18344	1.49633	0.0318912
MARK2	0.182512	1.49633	0.0318912
FGFR1	0.182473	1.49633	0.0318912
RPF2	0.179825	1.40447	0.0394032
RAD54L	0.178735	1.34917	0.0447535
PPT2	0.177384	1.34917	0.0447535
HMGXB3	0.177363	1.33332	0.0464172
TAX1BP3	0.17701	1.34917	0.0447535
PLA2G12B	0.175414	1.32023	0.0478381
RAPH1	0.174802	1.3197	0.0478963
ZNF394	0.174552	1.3197	0.0478963
HP	0.17372	1.30819	0.0491827
NCKAP1	0.173491	1.30819	0.0491827
TEAD4	0.171125	1.2331	0.0584655		rank 25th
TAPBPL	0.170962	1.2331	0.0584655
WWTR1	0.170791	1.21944	0.060334		rank 27th
PHACTR4	0.169603	1.21944	0.060334
BCAR3	0.168296	1.19189	0.0642843
B3GAT3	0.166169	1.11772	0.076257
B3GALT6	0.165562	1.10537	0.0784567
TXNDC9	0.16487	1.08936	0.0814025
FAM234B	0.164	1.08885	0.0814986
ABCD3	0.163746	1.08885	0.0814986
CENPF	0.162621	1.05447	0.0882127
ATG5	0.16096	1.00518	0.0988141
NUP205	0.160316	1.00518	0.0988141
CES1	0.160245	1.00518	0.0988141
ZBTB25	0.16016	1.00518	0.0988141
MRAS	0.159935	1.00518	0.0988141
ZC2HC1C	0.159755	1.00518	0.0988141
LEFTY1	0.159671	1.00518	0.0988141
DSC2	-0.163769	1.08885	0.0814986
CRYBB3	-0.164102	1.08885	0.0814986
TAS2R16	-0.169224	1.21713	0.0606552
PLPP4	-0.170449	1.22644	0.059369
DOK7	-0.200495	2.05879	0.00873386
RGMA	-0.201161	2.05879	0.00873386
